# Supplementary material for: Orphan Nuclear Receptor Family 4A (NR4A) Members NR4A2 and NR4A3 Selectively Modulate Elements of the Monocyte Response to Buffered Hypercapnia
Source: MDPI journal article supplement (doi:10.3390/ijms25052852), 2024-03-01
Supplement: s1 [file s1]

## Supplemental

**Supplemental  
Figure 1**

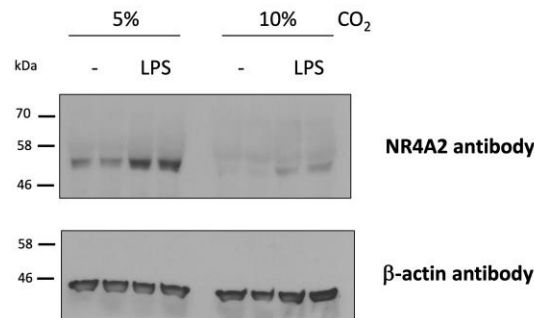

**Figure S1.** NR4A2 protein is reduced in hypercapnia. Western blot analysis of whole cell lysates from THP-1 monocytes exposed to 5% or 10% CO<sub>2</sub> for 90 mins +/- LPS 2.5μg/ml for an additional 4h. Primary antibodies for NR4A2 and β-actin were used followed by species specific HRP-conjugated secondary antibodies and visualisation using enhanced chemiluminescence. NR4A2 data is representative of  $n=3$  separate experiments.

**Supplemental  
Figure 2**

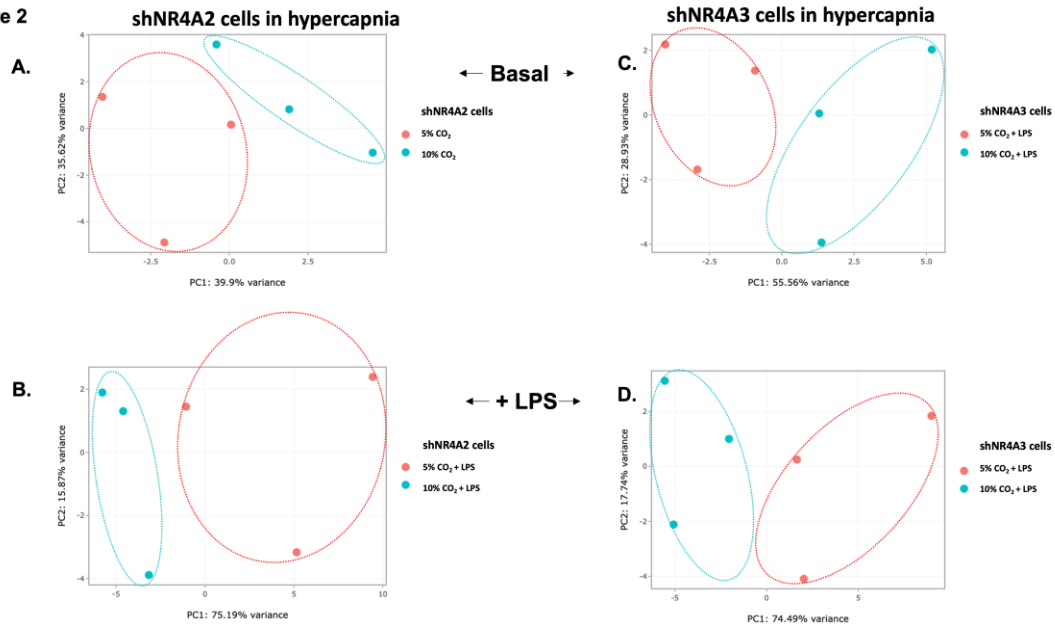

**Figure S2.** RNA-seq analysis of shNR4A2 and shNR4A3 monocytes exposed to buffered hypercapnia for 4h in the presence of LPS. Principal component analysis of shNR4A2 and shNR4A3 cells exposed to 5% CO<sub>2</sub> (red) or 10% CO<sub>2</sub> (blue) (4h) in the basal (A, C) and LPS stimulated state (2.5μg/ml for 2h) (B, D). The x-axis (PC1) is the vector that displays the most variance between samples and the y-axis (PC2) displays the second most. The percentage of total variance per principal component is shown on the axis label. Data is representative of  $n = 3$  individual experiments.

Supplemental  
Figure 3

| Significant DEGs                          |              |            | Significant DEGs                                     |              |            |
|-------------------------------------------|--------------|------------|------------------------------------------------------|--------------|------------|
| shNR4A2 cells                             |              |            | shNR4A2 cells                                        |              |            |
| 5% CO <sub>2</sub> Vs 10% CO <sub>2</sub> |              |            | 5% CO <sub>2</sub> +LPS Vs 10% CO <sub>2</sub> + LPS |              |            |
| Upregulated genes                         | LOG2FC       | p-adj      | Upregulated genes                                    | LOG2FC       | p-adj      |
| AL158166.1                                | 1.513133682  | 0.01789332 | IGF2                                                 | 1.886242783  | 0.00506764 |
| LINC00638                                 | 1.289175828  | 0.01289527 | GPR141                                               | 1.73612091   | 0.0046409  |
| MT-ND4                                    | 0.901831302  | 9.21E-06   | ANO5                                                 | 1.608909746  | 2.61E-06   |
| MTCO1P12                                  | 0.876481578  | 0.04456635 | FGF2                                                 | 1.571824613  | 0.02591089 |
| MANEAL                                    | 0.866500856  | 0.04456635 | SLC16A9                                              | 1.536446884  | 8.76E-06   |
| SERPINB2                                  | 0.82893373   | 0.01789332 | LINC00452                                            | 1.534786415  | 0.00312442 |
| MT-ND4L                                   | 0.792455979  | 0.00295093 | PI15                                                 | 1.534361143  | 0.032785   |
| ZNF74                                     | 0.758192403  | 0.01789332 | CD80                                                 | 1.512017558  | 0.00411919 |
| ALKBH2                                    | 0.757463503  | 0.01789332 | NR5A2                                                | 1.500300244  | 0.04000766 |
| MT-CO1                                    | 0.750010367  | 0.00427708 | AL133330.1                                           | 1.500081302  | 0.01510462 |
| Downregulated genes                       | LOG2FC       | p-adj      | Downregulated genes                                  | LOG2FC       | p-adj      |
| RHBDL3                                    | -1.23736269  | 0.02645631 | KCNK13                                               | -1.816902654 | 0.01039153 |
| PBX4                                      | -1.230849402 | 0.04079731 | B3GNT7                                               | -1.662201722 | 1.94E-05   |
| TNF                                       | -1.111081376 | 0.00186637 | TMEM37                                               | -1.514588968 | 0.00033047 |
| RFX8                                      | -1.056672607 | 0.04079731 | PDK4                                                 | -1.462895076 | 0.02544185 |
| ATP2A1                                    | -1.029901667 | 0.01289527 | SMIM3                                                | -1.448126654 | 3.66E-05   |
| MIR22HG                                   | -0.917155435 | 0.0230187  | RHBDL3                                               | -1.419928648 | 0.00428612 |
| CXCL8                                     | -0.869862187 | 0.01904809 | WNT7B                                                | -1.407503797 | 3.56E-05   |
| REC8                                      | -0.868430727 | 0.0354228  | F2RL3                                                | -1.26111394  | 0.0021081  |
| A4GALT                                    | -0.840387807 | 0.04456635 | ST7-AS1                                              | -1.243265224 | 0.04401988 |
| AL034397.3                                | -0.820840095 | 9.21E-06   | GPRC5C                                               | -1.242618146 | 0.00013872 |
| Basal                                     |              |            | + LPS                                                |              |            |

**Figure S3.** Top 10 differentially regulated genes in response to buffered hypercapnia in shNR4A2 cells. List of the 10 most differentially expressed genes cells (up (green) and down (red)) in shNR4A2 in hypercapnia in the basal (A) and LPS stimulated state (2.5µg/ml for 2h) (B). Genes are ranked by Log2 fold change. All genes have a *p*-adj<0.05. Data is representative of *n* = 3 individual experiments.

Supplemental  
Figure 4

| Significant DEGs                          |            |             | Significant DEGs                                     |            |            |
|-------------------------------------------|------------|-------------|------------------------------------------------------|------------|------------|
| shNR4A3 cells                             |            |             | shNR4A3 cells                                        |            |            |
| 5% CO <sub>2</sub> Vs 10% CO <sub>2</sub> |            |             | 5% CO <sub>2</sub> +LPS Vs 10% CO <sub>2</sub> + LPS |            |            |
| Upregulated genes                         | LOG2FC     | p-adj       | Upregulated genes                                    | LOG2FC     | p-adj      |
| RN7SL2                                    | 1.93945221 | 0.011400512 | SLAMF1                                               | 1.8364275  | 0.00215068 |
| SLC16A9                                   | 1.51550278 | 0.000224193 | SPATA31C1                                            | 1.77899834 | 0.00014948 |
| THNSL1                                    | 1.15787347 | 0.024101935 | CRIM1                                                | 1.767316   | 0.03020285 |
| LINC00638                                 | 1.09600166 | 0.005308471 | IGKC                                                 | 1.76586563 | 0.00023239 |
| SLC46A1                                   | 0.99804242 | 0.014229174 | C6orf58                                              | 1.64356511 | 0.00070974 |
| HSPH1                                     | 0.9498798  | 3.26257E-07 | EVA1A                                                | 1.59751902 | 6.47E-05   |
| RIOX2                                     | 0.87844398 | 4.30557E-06 | HSPA1A                                               | 1.5590445  | 0.01313429 |
| SERPINB2                                  | 0.84603628 | 6.61351E-06 | RPA4                                                 | 1.48803857 | 0.0010438  |
| TBC1D9                                    | 0.83792635 | 0.003106565 | PSTPIP2                                              | 1.43967736 | 0.00963072 |
| HSPA4L                                    | 0.80506854 | 0.000224193 | TP63                                                 | 1.43036218 | 0.00322725 |
| Downregulated genes                       | LOG2FC     | p-adj       | Downregulated genes                                  | LOG2FC     | p-adj      |
| C2orf48                                   | -1.2339701 | 0.003001251 | AC116351.2                                           | -1.7062145 | 0.00023526 |
| ATP2A1                                    | -1.2063019 | 0.000154311 | B3GNT7                                               | -1.5215211 | 0.03358237 |
| MIR22HG                                   | -1.1571433 | 0.000734399 | F2RL3                                                | -1.4876489 | 0.00011359 |
| AP001347.1                                | -1.1266397 | 0.040724478 | AC132872.3                                           | -1.4788048 | 0.00160728 |
| AC114490.1                                | -1.1070416 | 0.041340928 | AC132872.4                                           | -1.4588767 | 6.47E-05   |
| RFX8                                      | -1.092369  | 0.00102008  | C2orf48                                              | -1.4494994 | 0.00084597 |
| ARTN                                      | -1.0088844 | 0.00060915  | OCLN                                                 | -1.3251797 | 0.04307551 |
| MAFF                                      | -1.0008972 | 0.010459013 | FAM241B                                              | -1.2868822 | 0.0097268  |
| OSM                                       | -0.952871  | 0.00533492  | ADAMTS15                                             | -1.277873  | 0.00363948 |
| RAB43                                     | -0.9289324 | 0.017810107 | SLC6A6                                               | -1.2532132 | 2.52E-10   |
| Basal                                     |            |             | + LPS                                                |            |            |

**Figure S4.** Top 10 differentially regulated genes in response to buffered hypercapnia in shNR4A3 cells. List of the 10 most differentially expressed genes cells (up (green) and down (red)) in shNR4A3 in hypercapnia in the basal (A) and LPS stimulated state (2.5µg/ml for 2h) (B). Genes are ranked by Log2 fold change. All genes have a  $p\text{-adj}<0.05$ . Data is representative of  $n = 3$  individual experiments.

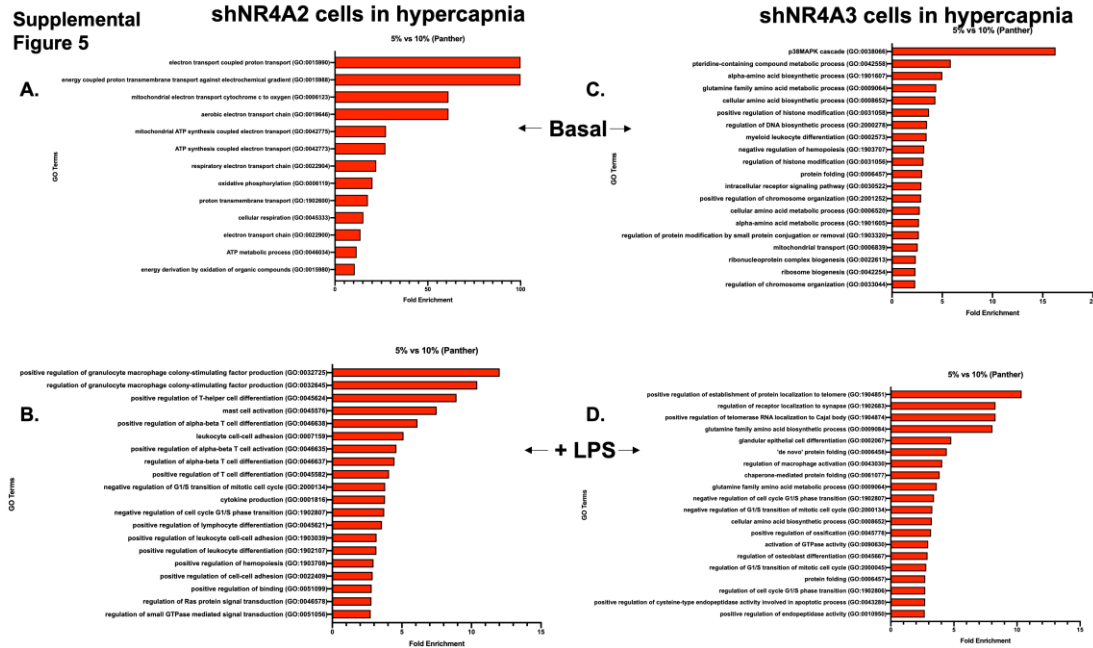

**Figure S5.** GO analysis of shNR4A2 and shNR4A3 cells exposed to hypercapnia in the basal and LPS-stimulated state. List of the top gene ontology terms associated with significantly differentially expressed genes in hypercapnia in the basal (A, C) and LPS stimulated state (2.5µg/ml for 2h) (B, D) in shNR4A2 and shNR4A3 cells, using a cut off value for significance of  $p\text{-adj}<0.05$ . Terms are ranked by fold enrichment. Data is representative of  $n = 3$  individual experiments.

**Supplemental  
Figure 6**

**A.**

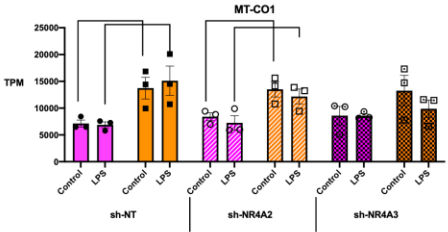

**B.**

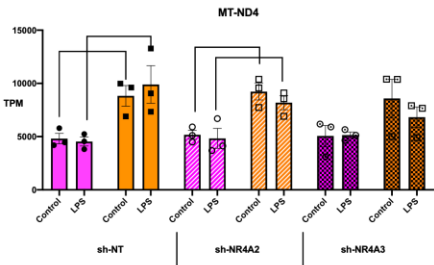

**C.**

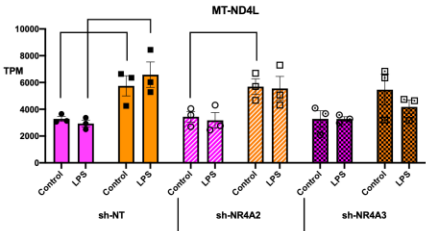

**Figure S6.** RNA-seq analysis of mitochondrial genes in shNT, shNR4A2 and shNR4A3 cells exposed to hypercapnia in the basal and LPS-stimulated state. Raw TPM values extracted from RNA-seq data for (A) *MT-CO1*, (B) *MT-ND4*, and (C) *MT-ND4L* in shNT, shNR4A2 and shNR4A3 THP-1 cells in the basal (unstimulated) and LPS stimulated (2.5µg/ml for 2h) state in both 5% (pink) and 10% (orange) CO<sub>2</sub> conditions (4h). CO<sub>2</sub> comparisons that had a  $p\text{-adj} < 0.05$  are indicated by the brackets. Data shown as mean  $\pm$  SEM for  $n=3$  independent experiments.

## Supplemental Figure 7

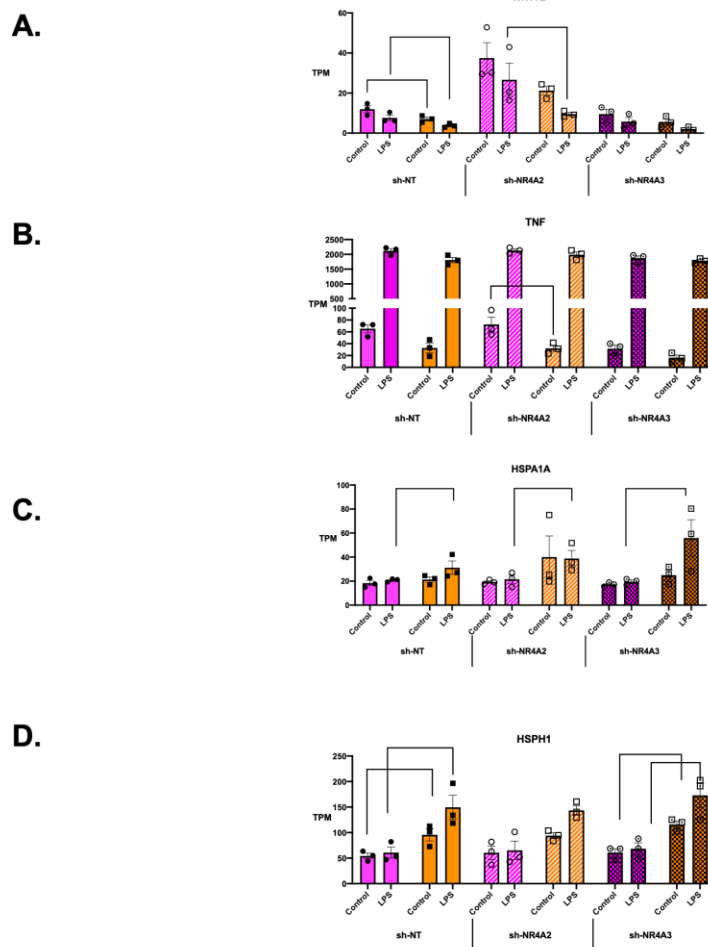

**Figure S7.** RNA-seq analysis of inflammation and heat-shock associated genes in shNT, shNR4A2 and shNR4A3 cells exposed to hypercapnia in the basal and LPS-stimulated state. Raw TPM values extracted from RNA-seq data for (A) *WNT7B*, (B) *TNF*, (C) *HSPA1A* and (D) *HSPH1* in shNT, shNR4A2 and shNR4A3 THP-1 cells in the basal (unstimulated) and LPS stimulated (2.5 $\mu$ g/ml for 2h) state in both 5% (pink) and 10% (orange) CO<sub>2</sub> conditions (4h). CO<sub>2</sub> comparisons that had a  $p\text{-adj} < 0.05$  are indicated by the brackets. Data shown as mean  $\pm$  SEM for  $n=3$  independent experiments.

Supplemental  
Figure 8

|       | GO Term                                                                               | shNT | shNR4A2 | shNR4A3 |                            |
|-------|---------------------------------------------------------------------------------------|------|---------|---------|----------------------------|
| Basal | electron transport coupled proton transport (GO:0015990)                              | ✓    | ✓       |         | Lost in shNR4A3 cells      |
|       | ATP synthesis coupled electron transport (GO:0042773)                                 | ✓    | ✓       |         | Lost in shNR4A3 cells      |
|       | cellular respiration (GO:0045333)                                                     | ✓    | ✓       |         | Lost in shNR4A3 cells      |
|       | alpha-amino acid biosynthetic process (GO:1901607)                                    | ✓    |         | ✓       | Lost in shNR4A2 cells      |
|       | protein folding (GO:0006457)*                                                         | ✓    |         | ✓       | Lost in shNR4A2 cells      |
|       | ribosome biogenesis (GO:0042254)                                                      | ✓    |         | ✓       | Lost in shNR4A2 cells      |
|       | ribonucleoprotein complex biogenesis (GO:0022613)                                     | ✓    |         | ✓       | Lost in shNR4A2 cells      |
| + LPS |                                                                                       |      |         |         |                            |
|       | positive regulation of establishment of protein localization to telomere (GO:1904851) | ✓    |         | ✓       | Lost in shNR4A2 cell       |
|       | positive regulation of telomerase RNA localization to Cajal body (GO:1904874)         | ✓    |         | ✓       | Lost in shNR4A2 cells      |
|       | 'de novo' protein folding (GO:0006458)                                                | ✓    |         | ✓       | Lost in shNR4A2 cells      |
|       | negative regulation of G1/S transition of mitotic cell cycle (GO:2000134)             |      | ✓       | ✓       | Gained in shNR4A2/A3 cells |
|       | negative regulation of cell cycle G1/S phase transition (GO:1902807)                  |      | ✓       | ✓       | Gained in shNR4A2/A3 cells |

**Figure S8.** Comparison of common CO<sub>2</sub>-responsive GO terms between shNT, shNR4A2 and shNR4A3 cells exposed to hypercapnia in the basal and LPS-stimulated state. Analysis reveals enriched GO terms that are lost in shNR4A3 cells (green text), lost in shNR4A2 cells (orange text) and gained in shNR4A2/3 cells (black text).

Supplemental  
Figure 9

A.

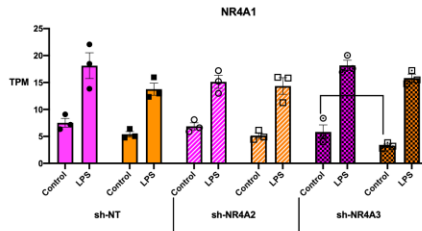

B.

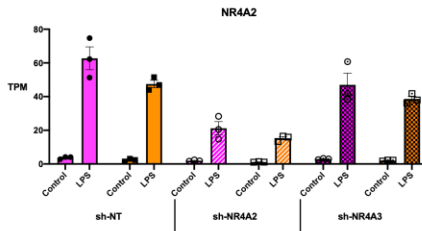

C.

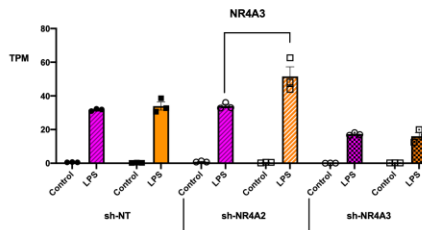

**Figure S9.** RNA-seq analysis of orphan nuclear receptor family 4A genes in shNT, shNR4A2 and shNR4A3 cells exposed to hypercapnia in the basal and LPS-stimulated state. Raw TPM values extracted from RNA-seq data for (A) *NR4A1*, (B) *NR4A2*, and (C) *NR4A3* in shNT, shNR4A2 and shNR4A3 THP-1 cells in the basal (unstimulated) and LPS stimulated (2.5µg/ml for 2h) state in both 5% (pink) and 10% (orange) CO<sub>2</sub> conditions (4h). CO<sub>2</sub> comparisons that

had a  $p\text{-adj}<0.05$  are indicated by the brackets. Data shown as mean  $\pm$  SEM for  $n=3$  independent experiments.

**Supplemental  
Figure 10**

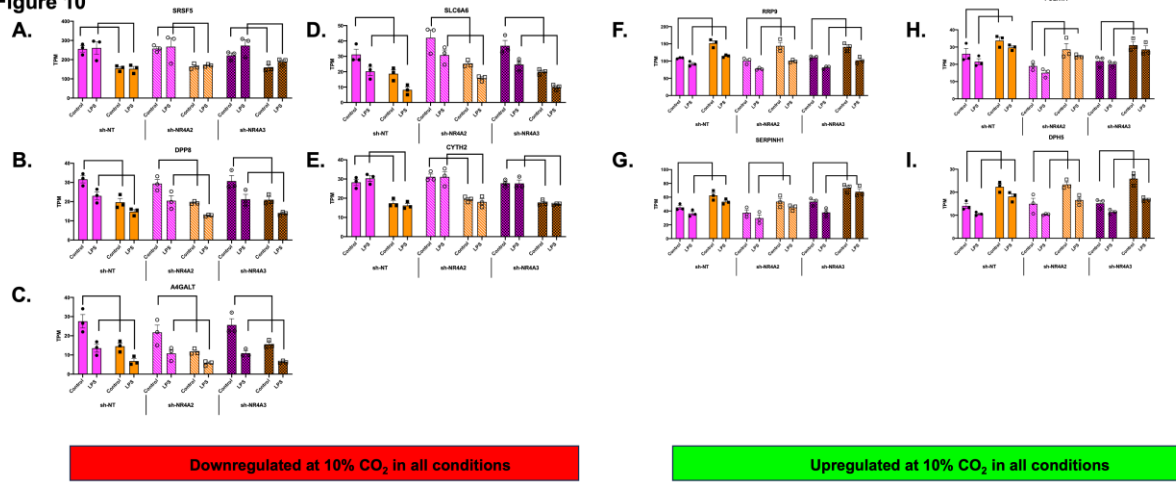

**Figure S10.** Hypercapnia consistently regulates genes in shNT, shNR4A2 and shNR4A3 THP-1 monocytes in the presence and absence of LPS. Raw TPM values extracted from RNA-seq data for (A) *SRSF5*, (B) *DPP8*, (C) *A4GALT*, (D) *SLC6A6*, (E) *CYTH2* (F) *RRP9*, (G) *SERPINH1*, (H) *POLR1A* and (I) *DPH5* in shNT/shNR4A2/shNR4A3 THP-1 cells in the basal and LPS stimulated (2.5 $\mu$ g/ml for 2h) state in both 5% and 10% CO<sub>2</sub> conditions (4h). All CO<sub>2</sub> comparisons had a  $p\text{-adj}<0.05$  as indicated by the brackets. Data shown as mean  $\pm$  SEM for  $n=3$  independent experiments.
