# Supplementary material for: Orphan Nuclear Receptor Family 4A (NR4A) Members NR4A2 and NR4A3 Selectively Modulate Elements of the Monocyte Response to Buffered Hypercapnia
Source: Int J Mol Sci. 2024 Mar 1;25(5):2852. doi: 10.3390/ijms25052852 (PMC10931687; doi:10.3390/ijms25052852)
Supplement: Supplementary file 1 [file ijms-25-02852-s001.zip › IJMS_Supplementary Data Sheets.xlsx]

## Sheet: Table 1 shNR4A2 basal
ID	log2FoldChange	pvalue	padj	A4	A10	B4	B10	C4	C10	Gene.name	shNR4A2 Cells	Differential gene expression analysis
ENSG00000000003	-0.0482113	0.851535	0.987792	90.7125	109.716	74.7509	68.0057	111.229	108.012	TSPAN6
ENSG00000000419	-0.0545505	0.695241	0.971306	1265	1175.53	972.815	1065.06	1134.88	1259.24	DPM1
ENSG00000000457	-0.0493497	0.792255	0.982669	177.697	191.567	160.03	157.949	158.153	162.018	SCYL3
ENSG00000000460	0.235324	0.255565	0.872547	216.219	224.656	256.89	154.658	288.499	267.329	C1orf112
ENSG00000000938	-0.149413	0.334825	0.905245	827.596	978.734	693.815	728.319	688.227	739.881	FGR
ENSG00000001036	-0.0819022	0.520976	0.953226	1918.63	2146.42	1677.16	1778.02	1934.34	1927.11	FUCA2
ENSG00000001084	0.0224166	0.885636	0.991763	743.097	828.963	724.347	628.504	889.829	863.194	GCLC
ENSG00000001167	0.00140369	0.990704	0.998903	2097.57	2292.71	2285.69	1983.13	2214.14	2314.15	NFYA
ENSG00000001460	0.0163667	0.933648	0.995869	146.631	166.315	187.404	184.273	218.112	198.022	STPG1
ENSG00000001461	0.0510353	0.69883	0.972338	581.554	535.517	568.528	559.401	589.164	584.164	NIPAL3
ENSG00000001497	-0.0410679	0.735248	0.976633	1466.31	1428.92	1529.76	1660.65	1572.84	1613.88	LAS1L
ENSG00000001561	0.00731042	0.966263	0.998855	444.864	430.155	316.902	330.156	417.976	411.345	ENPP4
ENSG00000001617	0.10059	0.58403	0.966005	257.226	245.554	348.487	258.86	231.147	275.43	SEMA3F
ENSG00000001629	0.163615	0.295236	0.890093	1057.48	1018.79	957.022	686.638	905.47	897.398	ANKIB1
ENSG00000001630	-0.0548249	0.795942	0.982669	129.234	173.281	129.498	150.271	188.567	143.116	CYP51A1
ENSG00000001631	0.153091	0.282509	0.886617	811.442	730.567	883.324	689.928	888.96	902.798	KRIT1
ENSG00000002016	0.526835	0.0362718	0.5376	79.5288	62.6947	94.7547	52.6495	89.5043	67.5073	RAD52
ENSG00000002330	0.121815	0.502436	0.949967	504.511	454.536	645.385	594.501	437.094	410.445	BAD
ENSG00000002549	0.0267956	0.82594	0.986326	2157.22	2141.2	1951.95	1861.38	2165.48	2154.83	LAP3
ENSG00000002586	-0.0991661	0.418631	0.927659	4330.59	4228.41	3800.72	4787.82	4628.15	4653.51	CD99
ENSG00000002726	-0.0276094	0.877747	0.988923	472.202	455.407	388.494	402.55	315.437	337.537	AOC1
ENSG00000002822	-0.118382	0.398781	0.921543	1491.16	1439.37	1336.04	1719.89	1273.05	1291.64	MAD1L1
ENSG00000002834	-0.0660998	0.56055	0.963078	6602.13	6514.15	5864.26	7029.81	6622.45	6441.1	LASP1
ENSG00000002919	0.0216724	0.857672	0.988319	1471.28	1404.53	1358.15	1377.66	1303.46	1287.14	SNX11
ENSG00000002933	0.437821	0.354955	NA	41.007	18.2859	10.5283	24.131	30.4141	18.002	TMEM176A
ENSG00000003056	0.0945555	0.430681	0.931649	3788.8	3467.36	3301.67	3100.84	3269.95	3131.44	M6PR
ENSG00000003096	0.250918	0.297962	0.890986	82.014	67.9192	102.124	88.8461	107.753	90.0098	KLHL13
ENSG00000003137	0.102465	0.803666	0.983746	21.1248	17.4152	29.4792	39.4872	42.5797	31.5034	CYP26B1
ENSG00000003147	-0.275886	0.124857	0.762797	205.035	282.997	226.358	321.382	258.954	234.926	ICA1
ENSG00000003249	-0.0466774	0.825024	0.986218	151.602	136.709	155.819	194.145	136.429	128.714	DBNDD1
ENSG00000003393	-0.0656919	0.648326	0.967532	559.187	720.989	724.347	631.794	642.171	663.372	ALS2
ENSG00000003400	-0.147317	0.380624	0.917608	237.344	287.351	296.898	286.282	292.844	343.837	CASP10
ENSG00000003402	-0.234063	0.0618884	0.628899	1384.3	1684.05	1429.74	1685.88	1280.87	1445.56	CFLAR
ENSG00000003436	-0.578603	0.0103537	0.339523	106.867	199.404	94.7547	177.692	168.581	179.119	TFPI
ENSG00000003509	0.0162036	0.920596	0.994292	278.351	277.772	250.574	235.826	259.823	264.629	NDUFAF7
ENSG00000003756	-0.166505	0.129428	0.765931	2368.47	2762.92	2418.35	2626.99	2467.88	2752.5	RBM5
ENSG00000003987	0.0974363	0.692206	0.971196	93.1978	78.3683	70.5396	69.1025	80.8145	80.1087	MTMR7
ENSG00000003989	0.309586	0.138247	0.780454	183.91	199.404	269.524	152.464	179.009	157.517	SLC7A2
ENSG00000004059	0.110473	0.414361	0.924765	1943.48	1706.69	1965.63	2011.65	1749.24	1523.87	ARF5
ENSG00000004139	-0.684037	0.0285172	0.500704	37.2791	59.2116	30.5321	50.4558	33.89	53.1058	SARM1
ENSG00000004142	0.189423	0.12258	0.761981	2646.82	2099.4	2326.75	2274.9	2276.71	1982.92	POLDIP2
ENSG00000004399	0.0510564	0.744704	0.976633	953.102	966.543	1127.58	1293.2	1227.86	938.802	PLXND1
ENSG00000004455	0.0359045	0.749276	0.976867	11216	10394.3	9871.33	10230.5	9949.75	9647.25	AK2
ENSG00000227076	1.51313	3.02993e-05	0.0178933	45.9776	15.6737	65.2755	17.5498	50.4005	23.4025	AL158166.1	Basal	shNR4A2 5% CO2 Vs shNR4A2 10% CO2 (4h)
ENSG00000258701	1.28918	1.23291e-05	0.0128953	106.867	39.1842	115.811	26.3248	96.4561	63.907	LINC00638		Ranked by fold change
ENSG00000004487	0.00719512	0.948942	0.997043	2475.33	2457.28	2539.43	2399.94	2535.66	2655.29	KDM1A
ENSG00000004534	-0.131914	0.29886	0.890986	2027.98	2124.65	1805.6	2039.07	1663.22	1856	RBM6
ENSG00000004660	-0.134161	0.426285	0.930121	205.035	217.69	217.936	222.664	202.471	245.727	CAMKK1
ENSG00000004700	0.00950919	0.945538	0.997043	807.714	850.732	882.271	757.934	911.553	975.706	RECQL
ENSG00000004766	0.0771889	0.621941	0.966504	334.269	319.569	325.324	272.023	321.52	336.637	VPS50
ENSG00000004777	-0.283339	0.171403	0.814472	318.115	377.039	496.936	632.891	360.624	423.946	ARHGAP33
ENSG00000004779	0.120412	0.347734	0.907505	1340.81	1098.03	1194.96	1229.59	1156.6	1068.42	NDUFAB1
ENSG00000004799	-0.756317	0.00160459	0.154734	202.55	379.651	112.653	216.082	189.436	254.728	PDK4
ENSG00000004809	0.204132	0.0955801	0.709061	1087.31	889.045	984.396	878.589	994.975	892.897	SLC22A16
ENSG00000004838	-0.218363	0.515572	0.95179	32.3086	36.5719	36.849	41.6809	31.283	38.7042	ZMYND10
ENSG00000004848	0.135729	0.581326	0.966005	75.8008	71.4023	112.653	95.4273	99.063	96.3105	ARX
ENSG00000004864	-0.0197285	0.897563	0.99267	412.555	357.882	373.755	383.903	392.776	452.749	SLC25A13
ENSG00000004866	0.08143	0.581917	0.966005	428.71	360.494	405.339	398.162	364.969	373.541	ST7
ENSG00000004897	-0.0943371	0.459506	0.939682	1932.3	2131.62	2093.03	2018.23	2191.55	2487.87	CDC27
ENSG00000004961	0.163262	0.202804	0.843341	800.258	680.063	714.871	662.507	737.759	667.873	HCCS
ENSG00000004975	0.177141	0.253434	0.872547	489.599	444.087	652.755	539.658	552.667	517.556	DVL2
ENSG00000005007	0.0839778	0.523256	0.954183	5624.17	5382.16	6733.9	5891.26	5102.61	5199.87	UPF1
ENSG00000005020	0.121031	0.399815	0.921543	2390.83	2187.35	1834.03	1754.98	2367.95	2117.93	SKAP2
ENSG00000005022	-0.0233052	0.846438	0.987024	8449.93	8138.12	7083.44	8031.25	7432.33	7168.38	SLC25A5
ENSG00000005059	0.197463	0.675859	NA	24.8527	24.3813	11.5811	15.3561	40.8418	27.903	MCUB
ENSG00000005073	0.015307	0.912954	0.99377	728.185	663.519	806.468	833.618	708.213	723.679	HOXA11
ENSG00000005075	0.0702477	0.635553	0.967532	1149.44	978.734	1206.54	1196.68	927.195	951.404	POLR2J
ENSG00000005100	0.256347	0.0770667	0.667656	586.525	584.28	720.136	495.783	610.019	523.857	DHX33
ENSG00000005108	0.204694	0.13932	0.780454	1640.28	1509.9	2184.62	1617.88	1797.04	1751.59	THSD7A
ENSG00000005156	0.222414	0.167903	0.811361	567.885	517.231	821.207	620.826	673.454	631.869	LIG3
ENSG00000005175	0.147622	0.276007	0.881781	986.654	813.289	898.064	768.903	935.015	961.305	RPAP3
ENSG00000005187	-0.0509764	0.886113	0.991944	45.9776	43.538	23.1623	32.906	40.8418	36.904	ACSM3
ENSG00000005189	-0.339545	0.0527437	0.601022	292.02	367.46	406.392	510.042	364.969	471.651	REXO5
ENSG00000005194	0.0718774	0.548564	0.959433	1554.54	1387.99	1464.49	1419.34	1354.73	1351.95	CIAPIN1
ENSG00000005206	-0.0515164	0.772161	0.979994	1306.01	1446.33	2069.86	2006.17	1428.59	1529.27	SPPL2B
ENSG00000005238	-0.548247	0.000715038	0.0992078	462.261	667.872	449.558	779.871	434.487	522.057	FAM214B
ENSG00000005243	0.0376274	0.824879	0.986218	238.586	207.241	203.196	229.245	224.195	212.423	COPZ2
ENSG00000005249	0.240856	0.205112	0.843341	360.365	336.113	280.053	220.47	384.955	309.634	PRKAR2B
ENSG00000005302	0.0726513	0.658903	0.96914	446.107	390.971	387.441	363.062	480.542	495.054	MSL3
ENSG00000005339	-0.141419	0.283627	0.887455	2584.68	3101.64	2788.95	3024.06	2400.97	2449.17	CREBBP
ENSG00000005379	-0.336063	0.490836	0.945198	172.727	284.738	432.713	589.017	385.824	378.941	TSPOAP1
ENSG00000005381	0.002749	0.992899	0.999293	57.1613	50.504	83.1736	118.461	98.194	72.0078	MPO
ENSG00000005436	0.0195529	0.890744	0.991944	436.166	481.53	475.879	422.293	487.494	477.052	GCFC2
ENSG00000005448	-0.121024	0.530374	0.956004	159.058	186.343	189.509	221.567	232.885	227.725	WDR54
ENSG00000005469	0.304392	0.17106	0.814472	101.896	91.4297	111.6	78.9743	109.491	90.9099	CROT
ENSG00000005471	-0.605259	0.00646219	0.30021	126.749	158.478	87.3849	177.692	145.119	211.523	ABCB4
ENSG00000005483	-0.0749719	0.552447	0.959969	1455.13	1625.71	1347.62	1337.08	1375.59	1435.66	KMT2E
ENSG00000005486	-0.0985053	0.468755	0.939682	936.948	960.448	789.622	938.917	811.621	816.389	RHBDD2
ENSG00000005700	0.00870442	0.945863	0.997043	1747.15	1835.56	1690.84	1478.57	1738.82	1829	IBTK
ENSG00000005801	0.00425079	0.974307	0.998855	1001.57	882.079	861.215	880.783	925.457	1015.31	ZNF195
ENSG00000005810	0.240734	0.115872	0.75311	2083.9	2171.67	2740.52	2159.73	2196.77	1612.08	MYCBP2
ENSG00000005812	-0.361526	0.0137401	0.386	1063.7	1441.98	871.743	1099.06	1089.69	1343.85	FBXL3
ENSG00000005844	-0.0456501	0.742467	0.976633	2108.75	2219.57	2615.23	2849.66	2599.97	2495.07	ITGAL
ENSG00000005882	-0.0941654	0.58142	0.966005	321.843	271.677	281.106	380.612	294.582	306.933	PDK2
ENSG00000005884	0.513954	0.0747559	0.664692	50.9481	53.9871	78.9622	43.8746	86.0284	54.0059	ITGA3
ENSG00000005889	-0.274998	0.070602	0.657123	771.677	1078	740.139	752.45	822.918	992.808	ZFX
ENSG00000005893	-0.124307	0.287031	0.887832	5398.01	5841.92	4796.69	5213.4	5382.42	5921.74	LAMP2
ENSG00000005961	-0.323961	0.240845	0.864153	62.1318	61.8239	57.9056	91.0398	52.1384	63.0069	ITGA2B
ENSG00000006007	0.0576108	0.661776	0.96914	1614.19	1522.96	1306.56	1298.69	1490.29	1414.05	GDE1
ENSG00000006015	0.0493425	0.797994	0.982669	707.06	670.485	1055.99	1032.15	711.689	691.275	REX1BD
ENSG00000006016	-0.39426	0.143494	0.787683	58.4039	79.2391	51.5887	68.0057	51.2694	63.907	CRLF1
ENSG00000006025	-0.00900754	0.95636	0.998335	381.49	399.679	536.943	473.846	431.011	486.053	OSBPL7
ENSG00000006062	-0.0652286	0.808886	0.984032	84.4993	60.0824	75.8038	95.4273	59.0902	73.808	MAP3K14
ENSG00000006118	-0.193898	0.736263	NA	22.3675	15.6737	9.47547	25.2279	10.4277	7.20078	TMEM132A
ENSG00000006125	-0.00181702	0.987005	0.998855	3785.07	3783.45	3689.12	3715.08	4042.46	4033.34	AP2B1
ENSG00000006194	0.022914	0.866816	0.988729	1697.44	1485.52	1443.43	1496.12	1274.78	1360.95	ZNF263
ENSG00000006282	-0.188873	0.190101	0.832119	801.501	904.719	917.015	1081.51	760.352	840.691	SPATA20
ENSG00000006327	-0.867286	0.00060299	0.089118	58.4039	102.75	66.3283	150.271	66.042	97.2106	TNFRSF12A
ENSG00000006432	0.315248	0.455288	NA	21.1248	19.1567	27.3736	19.7436	24.3313	19.8022	MAP3K9
ENSG00000006451	0.0985982	0.429593	0.931649	1046.3	959.577	946.494	868.717	971.512	937.902	RALA
ENSG00000006453	-0.20111	0.568182	0.96546	27.338	39.1842	28.4264	46.0683	51.2694	39.6043	BAIAP2L1
ENSG00000006459	-0.182846	0.372765	0.914544	289.534	374.427	202.143	232.535	298.058	288.031	KDM7A
ENSG00000006468	-0.0737061	0.861391	NA	17.3969	23.5105	21.0566	20.8404	31.283	29.7032	ETV1
ENSG00000006530	0.237212	0.0938592	0.705865	483.386	414.481	475.879	375.128	441.439	396.943	AGK
ENSG00000006534	-0.178109	0.195025	0.836471	1238.91	1367.09	1420.27	1704.53	1245.24	1348.35	ALDH3B1
ENSG00000006576	-0.143791	0.343497	0.907505	330.541	380.522	359.015	344.416	347.589	420.346	PHTF2
ENSG00000006607	-0.0466215	0.737495	0.976633	1089.79	1313.11	1301.3	1165.97	1048.85	1072.92	FARP2
ENSG00000006611	-0.219085	0.314617	0.896408	135.447	147.158	124.234	159.045	101.67	113.412	USH1C
ENSG00000006625	0.239901	0.0628958	0.630803	895.941	713.152	785.411	678.96	799.456	706.577	GGCT
ENSG00000006634	-0.0529543	0.730535	0.976633	782.861	823.738	670.653	741.481	935.884	914.5	DBF4
ENSG00000006638	-0.480351	0.0871137	0.690544	83.2567	85.3344	65.2755	170.014	119.918	122.413	TBXA2R
ENSG00000006652	0.0880036	0.575544	0.965769	1149.44	1185.1	1015.98	805.099	1169.64	1144.92	IFRD1
ENSG00000006695	0.111844	0.533616	0.956004	316.872	287.351	268.472	207.308	266.775	290.732	COX10
ENSG00000006704	-0.313977	0.0963536	0.709714	344.21	356.141	256.89	482.621	321.52	309.634	GTF2IRD1
ENSG00000006712	-0.0903712	0.434423	0.934381	1571.94	1691.01	1575.03	1757.18	1720.57	1736.29	PAF1
ENSG00000006715	0.040548	0.788935	0.982669	1686.26	1637.9	1268.66	1224.1	1571.1	1535.57	VPS41
ENSG00000006740	-0.0265131	0.896477	0.99267	139.175	134.097	138.974	167.82	136.429	121.513	ARHGAP44
ENSG00000006744	0.160908	0.222663	0.853882	1117.13	1010.95	1281.29	1146.22	1097.51	971.206	ELAC2
ENSG00000006747	-0.142871	0.496643	0.946971	108.109	138.451	124.234	120.655	142.512	155.717	SCIN
ENSG00000006756	-0.0648896	0.59716	0.966212	944.404	986.57	980.185	943.304	903.732	1027.01	ARSD
ENSG00000006757	0.0386971	0.842267	0.987024	160.3	134.968	172.664	187.564	165.974	164.718	PNPLA4
ENSG00000006831	-0.366018	0.00623047	0.297466	2363.5	2922.27	1954.05	3052.58	2199.37	2423.96	ADIPOR2
ENSG00000006837	0.410626	0.336038	0.905821	37.2791	23.5105	21.0566	13.1624	28.6761	27.903	CDKL3
ENSG00000007047	-0.146888	0.232347	0.860298	1190.45	1300.04	1205.49	1398.5	1128.8	1204.33	MARK4
ENSG00000007080	0.194479	0.158805	0.800619	1289.86	1085.84	1445.54	1310.75	1204.4	1047.71	CCDC124
ENSG00000007129	0.180838	0.326468	0.901639	200.065	181.989	196.879	155.755	169.45	160.217	CEACAM21
ENSG00000007168	-0.0791506	0.541864	0.958249	1803.07	1897.38	1471.86	1658.46	1776.18	1778.59	PAFAH1B1
ENSG00000007171	0.447063	0.463031	NA	12.4264	11.3199	10.5283	8.77492	13.0346	6.30069	NOS2
ENSG00000007202	0.23041	0.0548839	0.608195	5729.8	4927.63	6097.99	5109.2	5165.18	4447.38	KIAA0100
ENSG00000007237	-0.323424	0.0559688	0.610974	2921.44	3584.05	2235.16	3058.06	2040.35	2359.16	GAS7
ENSG00000007255	0.18723	0.257406	0.873242	915.823	711.41	767.513	798.518	673.454	558.961	TRAPPC6A
ENSG00000007264	0.293811	0.0498722	0.589484	503.268	381.393	408.498	352.094	430.142	359.139	MATK
ENSG00000007312	0.46655	0.0873527	0.690544	69.5877	47.021	77.9094	64.7151	70.3869	46.8051	CD79B
ENSG00000007314	0.332309	0.472457	NA	19.8822	19.1567	23.1623	9.87179	27.8072	27.0029	SCN4A
ENSG00000007341	0.0944329	0.558	0.96179	438.651	406.645	360.068	312.607	388.431	389.742	ST7L
ENSG00000007350	-0.0666626	0.671623	0.969428	1059.97	1010.95	1281.29	1506	1276.52	1276.34	TKTL1
ENSG00000007372	-0.657241	0.0708325	0.657123	41.007	53.9871	24.2151	31.8091	24.3313	53.1058	PAX6
ENSG00000007376	0.203803	0.234611	0.861347	1609.21	1345.32	1736.12	1576.2	1213.96	1036.91	RPUSD1
ENSG00000007384	-0.125544	0.438129	0.934958	551.731	588.633	709.607	827.037	622.185	642.67	RHBDF1
ENSG00000007392	-0.0169475	0.906815	0.99377	506.996	581.667	592.743	494.686	564.833	607.566	LUC7L
ENSG00000007402	-0.999916	0.126867	NA	13.669	16.5444	3.15849	9.87179	5.21384	16.2018	CACNA2D2
ENSG00000007516	-0.337789	0.327058	0.902212	21.1248	45.2795	46.3245	59.2307	50.4005	46.8051	BAIAP3
ENSG00000007520	0.121017	0.372688	0.914544	904.64	760.173	893.853	868.717	775.993	738.08	TSR3
ENSG00000007541	0.062552	0.703911	0.973067	719.487	709.669	1000.19	934.529	752.531	725.479	PIGQ
ENSG00000007545	0.0108099	0.942434	0.997043	494.569	555.544	659.071	609.857	557.881	535.558	CRAMP1
ENSG00000007866	-0.354461	0.103577	0.725197	223.675	258.616	151.608	312.607	212.899	181.82	TEAD3
ENSG00000007923	-0.0737848	0.566484	0.965224	1350.75	1405.41	1251.81	1346.95	1153.13	1198.03	DNAJC11
ENSG00000007944	-0.115552	0.45758	0.939178	511.966	626.947	621.17	541.852	452.735	547.26	MYLIP
ENSG00000007968	-0.259591	0.076169	0.664771	564.157	735.792	683.287	800.712	570.916	641.77	E2F2
ENSG00000008018	-0.0437073	0.685873	0.971196	3567.61	3604.94	3377.48	3681.08	3576.69	3559.89	PSMB1
ENSG00000008056	-0.274089	0.650663	NA	4.97055	9.57835	11.5811	19.7436	15.6415	10.8012	SYN1
ENSG00000008083	-0.316469	0.0459727	0.570364	936.948	1138.08	968.603	1329.4	795.111	895.597	JARID2
ENSG00000008086	0.359033	0.285042	0.887832	45.9776	55.7286	63.1698	24.131	52.1384	45.0049	CDKL5
ENSG00000008128	-0.197224	0.202459	0.843341	272.137	332.63	294.792	335.641	325.865	357.339	CDK11A
ENSG00000008130	0.198489	0.123625	0.761981	1939.76	1880.84	2236.21	1705.63	1818.76	1636.38	NADK
ENSG00000008226	0.227066	0.629215	NA	17.3969	20.0275	30.5321	20.8404	15.6415	13.5015	DLEC1
ENSG00000008256	-0.128488	0.435938	0.934958	779.133	869.889	721.188	835.811	610.888	600.365	CYTH3
ENSG00000008277	0.372347	0.127444	0.76501	79.5288	74.8853	92.649	61.4245	97.325	72.0078	ADAM22
ENSG00000008282	-0.066804	0.659335	0.96914	1790.64	1816.4	1387.63	1600.33	1989.95	1996.42	SYPL1
ENSG00000008283	0.045494	0.790364	0.982669	221.189	211.595	267.419	240.214	225.064	240.326	CYB561
ENSG00000008294	-0.158042	0.202288	0.843341	2332.43	2699.35	2055.12	2243.09	2261.94	2474.37	SPAG9
ENSG00000008300	-0.0593599	0.805847	0.984032	111.837	124.519	150.555	168.917	109.491	95.4104	CELSR3
ENSG00000008311	0.00376402	0.994401	NA	9.94109	15.6737	12.634	10.9687	19.1174	15.3017	AASS
ENSG00000008324	0.182461	0.270991	0.880876	536.819	394.454	394.811	358.675	457.08	468.051	SS18L2
ENSG00000008382	-0.0592882	0.685824	0.971196	372.791	416.223	365.332	382.806	372.79	358.239	MPND
ENSG00000008394	0.0537083	0.696056	0.971317	1530.93	1526.44	1353.94	1240.55	1620.64	1572.47	MGST1
ENSG00000008405	0.014077	0.938217	0.996967	218.704	250.779	210.566	178.789	231.147	223.224	CRY1
ENSG00000008441	0.0550423	0.745582	0.976633	502.025	477.176	654.86	652.635	510.956	477.952	NFIX
ENSG00000008513	-0.118477	0.43828	0.934958	2941.32	2841.29	2314.12	3192.98	2361.87	2234.04	ST3GAL1
ENSG00000008516	0.0962449	0.742267	0.976633	50.9481	40.9257	51.5887	52.6495	55.6143	54.906	MMP25
ENSG00000008710	0.446779	0.00872507	0.328628	3905.61	2708.93	4540.86	3580.17	3217.81	2270.05	PKD1
ENSG00000008735	-0.291448	0.59414	NA	6.21318	21.769	13.6868	15.3561	19.9864	12.6014	MAPK8IP2
ENSG00000008838	-0.0111058	0.927842	0.99557	2042.89	2064.57	2276.22	2330.84	2022.97	1997.32	MED24
ENSG00000008853	0.166919	0.240586	0.864153	1197.9	992.666	1400.26	1187.91	1059.28	1077.42	RHOBTB2
ENSG00000008869	-0.0476219	0.74183	0.976633	719.487	863.793	783.305	644.957	715.165	781.285	HEATR5B
ENSG00000008952	0.0770518	0.619047	0.966212	3591.22	3228.78	2575.22	2378	3043.15	3119.74	SEC62
ENSG00000008988	0.0409446	0.74587	0.976633	23785.3	20971.4	19286.8	20768.1	19047	18638.3	RPS20
ENSG00000009307	-0.141339	0.312881	0.895252	24933.5	27471.6	19006.7	21111.4	22911.4	25146	CSDE1
ENSG00000009335	0.065328	0.593369	0.966212	3947.86	4140.46	3752.29	3394.8	3785.25	3439.27	UBE3C
ENSG00000009413	0.101595	0.463022	0.939682	974.227	1113.7	1219.18	915.883	1092.3	1032.41	REV3L
ENSG00000009724	-0.357813	0.326882	0.902212	27.338	40.0549	22.1094	32.906	33.89	34.2037	MASP2
ENSG00000009780	0.0875625	0.67365	0.969428	212.491	188.084	162.136	131.624	189.436	208.823	FAM76A
ENSG00000009790	-0.0364673	0.821493	0.985967	284.564	280.385	324.272	295.057	289.368	345.638	TRAF3IP3
ENSG00000009830	0.226311	0.181582	0.82872	382.732	338.725	408.498	296.154	295.451	291.632	POMT2
ENSG00000009844	0.0649122	0.651563	0.968989	2600.84	2489.5	2040.38	1878.93	2383.59	2343.86	VTA1
ENSG00000009950	-0.671547	0.000699451	0.0984401	222.432	377.039	190.562	334.544	180.746	232.225	MLXIPL
ENSG00000009954	0.00277469	0.982715	0.998855	5543.4	5632.07	4903.03	4494.95	4706.36	4991.94	BAZ1B
ENSG00000010017	-0.242952	0.0770036	0.667656	1284.89	1497.71	1030.72	1446.77	1387.75	1439.26	RANBP9
ENSG00000010030	-0.461329	0.398319	NA	9.94109	16.5444	12.634	21.9373	12.1656	9.90108	ETV7
ENSG00000010072	-0.129551	0.377066	0.914819	703.332	835.058	656.966	614.245	669.979	768.684	SPRTN
ENSG00000010165	0.291965	0.0190095	0.439908	1325.89	1115.44	1403.42	998.148	1283.47	1162.03	METTL13
ENSG00000010219	0.195825	0.587638	0.966195	34.7938	20.8982	41.0604	41.6809	38.2348	37.8041	DYRK4
ENSG00000010244	-0.0537398	0.688705	0.971196	7084.27	7752.37	6146.42	5824.36	6151.46	6536.51	ZNF207
ENSG00000010256	0.0443205	0.686439	0.971196	3799.98	3415.99	3677.53	3741.41	3630.57	3614.79	UQCRC1
ENSG00000010270	0.113451	0.358791	0.91158	1099.73	997.89	1043.35	964.145	1146.18	1078.32	STARD3NL
ENSG00000010278	-0.0330401	0.877265	0.988923	157.815	172.41	117.917	131.624	182.484	164.718	CD9
ENSG00000010292	-0.00274383	0.986464	0.998855	1993.19	1990.56	2757.36	2729	2710.33	2759.7	NCAPD2
ENSG00000010295	-0.156908	0.284275	0.887832	623.804	673.097	765.407	825.94	616.102	738.08	IFFO1
ENSG00000010310	-0.343565	0.165968	0.811164	69.5877	113.199	112.653	161.239	122.525	116.113	GIPR
ENSG00000010318	-0.230996	0.356442	0.909642	94.4404	102.75	128.445	195.242	145.988	138.615	PHF7
ENSG00000010319	0.213996	0.39227	0.921543	105.624	97.525	193.721	137.108	114.705	123.313	SEMA3G
ENSG00000010322	-0.0193064	0.876402	0.988923	2301.36	2407.65	2616.28	2584.21	2210.67	2233.14	NISCH
ENSG00000010327	0.410953	0.358101	NA	23.6101	15.6737	25.2679	15.3561	19.1174	19.8022	STAB1
ENSG00000010361	0.13281	0.646654	0.967532	53.4334	41.7964	66.3283	71.2963	68.6489	60.3066	FUZ
ENSG00000010404	-0.366551	0.00975263	0.335579	1388.03	1908.7	1202.33	1417.15	1213.09	1573.37	IDS
ENSG00000010539	-0.0193807	0.885873	0.991944	700.847	638.267	583.268	649.344	654.337	675.974	ZNF200
ENSG00000010610	-0.0765726	0.52917	0.956004	4763.03	4742.16	4288.18	5107.01	4277.09	4205.26	CD4
ENSG00000010626	-0.055106	0.858635	0.988319	43.4923	43.538	44.2189	39.4872	47.7935	57.6063	LRRC23
ENSG00000010671	0.0108466	0.924993	0.99542	1769.51	1798.99	1762.44	1768.15	1931.73	1856.9	BTK
ENSG00000010803	-0.0447347	0.691865	0.971196	3845.96	3947.15	4001.81	4424.76	4131.1	3987.43	SCMH1
ENSG00000010810	0.377975	0.0131083	0.379086	743.097	472.822	584.321	454.102	580.474	538.259	FYN
ENSG00000010818	-0.243023	0.155802	0.799933	268.41	385.746	389.547	437.649	336.293	356.439	HIVEP2
ENSG00000011007	0.125508	0.284285	0.887832	1693.71	1546.47	1655.05	1414.96	1591.96	1565.27	ELOA
ENSG00000011009	0.209048	0.114588	0.749503	1625.37	1267.83	1664.52	1525.74	1417.3	1279.04	LYPLA2
ENSG00000011021	-0.387463	0.0108551	0.348927	418.769	583.409	507.464	659.216	422.321	522.957	CLCN6
ENSG00000011028	-0.175141	0.25341	0.872547	11361.4	11811.9	12908.7	16844.6	11141.1	11328.6	MRC2
ENSG00000011052	0.160264	0.607863	0.966212	88.2272	72.273	42.1132	42.7778	71.2558	63.907	NME1-NME2
ENSG00000011105	-0.268352	0.439369	0.934958	26.0954	47.021	55.8	41.6809	31.283	47.7052	TSPAN9
ENSG00000011114	-0.307673	0.0241379	0.465908	1778.21	2611.41	1943.52	2197.02	1737.08	1946.91	BTBD7
ENSG00000011132	0.412452	0.0402544	0.558692	279.593	188.084	399.023	312.607	325.865	256.528	APBA3
ENSG00000011143	0.335771	0.0585979	0.622878	288.292	223.785	375.86	265.441	345.851	312.334	MKS1
ENSG00000011198	0.00221386	0.991067	0.998903	195.094	202.016	174.77	144.786	200.733	221.424	ABHD5
ENSG00000011201	-0.0215011	0.883035	0.990728	1047.54	1131.99	869.637	861.039	1065.36	1032.41	ANOS1
ENSG00000011243	-0.105673	0.371898	0.914544	1603	1720.62	1667.68	1804.34	1512.01	1621.08	AKAP8L
ENSG00000011258	-0.295566	0.0315996	0.515792	531.849	723.601	588.532	653.732	620.447	760.583	MBTD1
ENSG00000011260	0.243928	0.0609854	0.628899	1473.77	1233.87	1314.98	1048.6	1439.02	1285.34	UTP18
ENSG00000011275	-0.0106877	0.929984	0.99557	2292.66	2335.38	2284.64	2257.35	2011.67	2043.22	RNF216
ENSG00000011295	-0.121895	0.425288	0.929151	433.68	415.352	337.958	427.778	418.845	451.849	TTC19
ENSG00000011304	-0.104688	0.429279	0.93152	11693.2	12946.5	14386.9	15079.7	11509.6	12394.3	PTBP1
ENSG00000011332	-0.201085	0.568131	0.96546	24.8527	53.1163	45.2717	59.2307	54.7453	33.3036	DPF1
ENSG00000011376	0.30479	0.0196548	0.439908	929.492	783.683	930.702	709.672	835.084	686.775	LARS2
ENSG00000011405	-0.00647064	0.971194	0.998855	682.208	861.181	761.196	499.074	671.717	761.483	PIK3C2A
ENSG00000011422	-0.239468	0.163013	0.806273	1781.94	1984.46	1140.21	1778.02	1454.66	1402.35	PLAUR
ENSG00000011426	-0.0478665	0.708249	0.9749	2031.71	2168.19	2360.44	2265.03	2398.37	2588.68	ANLN
ENSG00000011451	0.000335848	0.998263	0.999594	1555.78	1573.46	2004.59	1972.16	1479.86	1495.06	WIZ
ENSG00000011454	0.0923654	0.515014	0.95179	589.01	613.015	615.905	488.105	601.33	591.364	RABGAP1
ENSG00000011478	-0.0932746	0.542254	0.958249	319.358	372.685	305.321	332.35	355.41	341.137	QPCTL
ENSG00000011485	0.130168	0.309113	0.893069	1842.83	1619.61	2010.91	1937.06	1789.22	1601.27	PPP5C
ENSG00000011523	0.456058	0.0253229	0.473974	173.969	145.417	273.736	162.336	192.043	159.317	CEP68
ENSG00000011566	-0.079474	0.603581	0.966212	331.784	354.399	295.845	318.091	341.507	351.038	MAP4K3
ENSG00000011600	0.0701217	0.663292	0.96914	3401.1	3002.38	2415.19	2776.17	2522.63	2162.04	TYROBP
ENSG00000011638	0.170276	0.34248	0.907505	231.13	197.662	238.992	175.498	219.85	238.526	TMEM159
ENSG00000012048	0.0808717	0.518965	0.952539	1877.62	1976.62	2184.62	1773.63	2121.16	2096.33	BRCA1
ENSG00000012061	0.0435092	0.747459	0.976753	1225.24	1062.33	1171.8	1240.55	1029.73	1021.61	ERCC1
ENSG00000012171	-0.672341	0.0334589	0.526307	43.4923	57.4701	56.8528	76.7806	26.9382	67.5073	SEMA3B
ENSG00000012174	0.26179	0.0813164	0.679569	500.783	468.469	472.721	360.869	508.35	405.044	MBTPS2
ENSG00000012211	0.0261881	0.860417	0.988341	457.29	473.693	465.351	405.84	396.252	413.145	PRICKLE3
ENSG00000012232	0.286548	0.0196027	0.439908	1386.78	1045.78	1396.05	1110.03	1239.16	1140.42	EXTL3
ENSG00000012660	-0.0256071	0.858502	0.988319	3183.64	3379.42	2554.17	2562.28	3229.97	3184.55	ELOVL5
ENSG00000012779	-0.324622	0.00847434	0.328278	1148.2	1536.02	1316.04	1672.72	1317.36	1531.07	ALOX5
ENSG00000012817	0.0359911	0.793751	0.982669	1369.39	1477.68	1806.66	1510.38	1637.15	1708.39	KDM5D
ENSG00000012822	-0.211719	0.171057	0.814472	566.642	584.28	589.585	779.871	683.013	769.584	CALCOCO1
ENSG00000012963	-0.0514996	0.650382	0.968072	1673.83	1677.08	1655.05	1712.21	1565.02	1681.38	UBR7
ENSG00000012983	0.0615126	0.683148	0.971077	572.856	565.994	488.513	448.618	577.867	554.46	MAP4K5
ENSG00000013275	0.132717	0.266164	0.880394	1778.21	1523.83	1619.25	1455.54	1545.9	1526.57	PSMC4
ENSG00000013288	-0.119373	0.344579	0.907505	2389.59	2447.7	2465.73	2902.31	2229.79	2347.46	MAN2B2
ENSG00000013306	0.0628608	0.614073	0.966212	3420.98	3050.27	3346.95	3434.29	2970.15	2838.01	SLC25A39
ENSG00000013364	-0.103981	0.401239	0.921773	2272.78	2399.81	2038.28	2335.23	1995.16	2040.52	MVP
ENSG00000013374	-0.101688	0.401031	0.921773	1073.64	1123.28	1039.14	1119.9	1116.63	1222.33	NUB1
ENSG00000013375	-0.136242	0.337702	0.906788	710.788	790.65	626.434	652.635	720.379	816.389	PGM3
ENSG00000013392	-0.0244028	0.912541	0.99377	89.4699	105.362	115.811	125.043	128.608	111.612	RWDD2A
ENSG00000013441	-0.290192	0.110438	0.739189	730.67	851.603	780.147	637.279	596.985	1084.62	CLK1
ENSG00000013503	0.132643	0.378683	0.916183	464.746	471.081	475.879	368.547	494.446	468.051	POLR3B
ENSG00000013523	0.078747	0.590411	0.966195	534.334	506.782	549.577	476.04	443.176	460.85	ANGEL1
ENSG00000013561	0.0364936	0.78089	0.981463	1005.29	1010.95	974.92	892.848	1086.22	1085.52	RNF14
ENSG00000013563	0.0417418	0.771443	0.979994	475.93	408.386	431.66	481.524	459.687	439.248	DNASE1L1
ENSG00000013573	-0.191692	0.204568	0.843341	817.655	1016.18	1141.27	1237.26	935.015	1054.91	DDX11
ENSG00000013583	0.0864046	0.589711	0.966195	284.564	276.031	261.102	266.538	318.044	271.83	HEBP1
ENSG00000013725	0.0509783	0.854638	0.988043	60.8892	60.9532	58.9585	62.5213	56.4833	46.8051	CD6
ENSG00000013810	-0.134556	0.364086	0.91311	3391.16	3624.1	4305.02	5108.1	4136.31	4261.96	TACC3
ENSG00000014123	0.0584793	0.667649	0.96914	1067.43	1089.32	992.819	892.848	1152.26	1101.72	UFL1
ENSG00000014138	-0.123079	0.366639	0.914544	849.964	913.427	993.871	1072.73	831.608	928.901	POLA2
ENSG00000014164	-0.122199	0.349028	0.907505	1118.37	1242.57	1243.39	1375.47	1087.09	1136.82	ZC3H3
ENSG00000014216	-0.0820036	0.538927	0.957544	4126.8	4295.46	4801.96	5549.04	4546.47	4423.08	CAPN1
ENSG00000014257	-0.353136	0.0320465	0.517502	504.511	640.879	392.706	540.755	399.728	471.651	ACPP
ENSG00000014641	0.00500562	0.968226	0.998855	3998.81	3593.62	3943.9	4476.31	4423.08	4256.56	MDH1
ENSG00000014824	-0.0323445	0.81055	0.984111	1722.29	1645.74	1342.36	1497.22	1671.91	1699.38	SLC30A9
ENSG00000014914	-0.0804481	0.577126	0.966005	520.665	541.612	441.136	472.749	458.818	485.153	MTMR11
ENSG00000014919	0.20002	0.157482	0.799933	688.421	626.947	760.143	605.47	815.966	739.881	COX15
ENSG00000015133	0.367035	0.0396055	0.555168	287.049	244.683	416.921	265.441	301.534	270.029	CCDC88C
ENSG00000015153	-0.0412746	0.814775	0.98514	196.337	220.302	217.936	228.148	259.823	247.527	YAF2
ENSG00000015171	0.0474142	0.710006	0.975149	1416.61	1414.11	1270.77	1196.68	1436.41	1378.05	ZMYND11
ENSG00000015285	-0.0200075	0.863797	0.988729	2527.52	2356.27	2389.92	2626.99	2307.12	2342.05	WAS
ENSG00000015413	-1.17386	0.0835276	NA	4.97055	6.09532	5.26415	16.453	7.82076	18.9021	DPEP1
ENSG00000015475	0.00992868	0.944765	0.997043	2223.08	2090.69	1872.98	2091.72	1762.28	1633.68	BID
ENSG00000015479	-0.151232	0.452109	0.93829	175.212	217.69	155.819	141.496	167.712	192.621	MATR3
ENSG00000015520	0.109667	0.849439	NA	12.4264	19.1567	12.634	7.67806	13.9036	9.00098	NPC1L1
ENSG00000198886	0.901831	7.46114e-10	9.21266e-06	81083.3	39814.6	59587	35617.4	83469.3	44527.8	MT-ND4		Padj </=0.05
ENSG00000015676	0.293684	0.0211294	0.45034	1494.89	1266.08	1643.47	1269.07	1367.76	1140.42	NUDCD3
ENSG00000016391	-0.240883	0.641736	NA	8.69846	15.6737	25.2679	25.2279	13.0346	15.3017	CHDH
ENSG00000016864	0.0434205	0.735423	0.976633	642.443	663.519	695.921	646.054	700.393	669.673	GLT8D1
ENSG00000017260	0.158261	0.284534	0.887832	1388.03	1169.43	1163.38	922.464	1216.56	1280.84	ATP2C1
ENSG00000017483	0.0969721	0.494498	0.946067	503.268	459.761	550.63	471.652	527.467	547.26	SLC38A5
ENSG00000017797	-0.00561011	0.962043	0.998855	2035.44	2119.43	2208.84	2143.28	2316.68	2325.85	RALBP1
ENSG00000018189	0.0186842	0.933397	0.995869	103.139	106.233	95.8075	88.8461	116.442	116.113	RUFY3
ENSG00000018236	-0.180262	0.612951	0.966212	23.6101	48.7625	44.2189	29.6154	39.9728	44.1048	CNTN1
ENSG00000018280	-0.182822	0.372676	0.914544	146.631	181.989	120.023	132.721	149.463	156.617	SLC11A1
ENSG00000018408	0.281281	0.284481	0.887832	73.3156	55.7286	70.5396	55.9401	82.5525	74.7081	WWTR1
ENSG00000018510	0.074339	0.617825	0.966212	2006.86	2058.48	1748.75	1434.7	1984.74	1955.91	AGPS
ENSG00000018610	0.0772637	0.605505	0.966212	678.48	578.184	523.256	506.752	543.977	566.162	CXorf56
ENSG00000018625	0.237427	0.703664	NA	23.6101	13.9321	5.26415	8.77492	10.4277	9.90108	ATP1A2
ENSG00000018699	0.143607	0.347312	0.907505	591.495	592.116	526.415	433.262	576.129	505.855	TTC27
ENSG00000018869	0.0350872	0.909835	0.99377	50.9481	42.6672	43.166	40.584	39.9728	46.8051	ZNF582
ENSG00000019102	-0.25209	0.23168	0.860298	120.536	156.737	107.389	130.527	112.967	117.913	VSIG2
ENSG00000019144	-0.202061	0.263062	0.879671	534.334	585.15	707.502	936.723	739.496	762.383	PHLDB1
ENSG00000019169	0.0639823	0.86438	0.988729	42.2497	26.1228	23.1623	29.6154	35.6279	40.5044	MARCO
ENSG00000019485	0.20293	0.468642	0.939682	54.676	56.5994	84.2264	63.6182	59.9592	53.1058	PRDM11
ENSG00000019549	-0.548478	0.284275	NA	9.94109	16.5444	10.5283	16.453	19.9864	27.0029	SNAI2
ENSG00000019582	-0.18042	0.240209	0.863574	2393.32	2392.85	1723.48	2371.42	1771.84	1905.51	CD74
ENSG00000019991	-0.133729	0.606201	0.966212	70.8303	72.273	70.5396	86.6524	60.8281	63.0069	HGF
ENSG00000019995	-0.079811	0.632789	0.967532	331.784	381.393	290.581	297.251	371.052	370.84	ZRANB1
ENSG00000020129	0.399905	0.00389452	0.241786	893.456	655.682	992.819	689.928	771.648	667.873	NCDN
ENSG00000020181	0.106424	0.4814	0.94489	6243.01	5445.73	6069.56	6078.83	4761.11	4333.97	ADGRA2
ENSG00000020256	0.143629	0.299144	0.890986	560.429	474.564	528.521	456.296	493.577	499.554	ZFP64
ENSG00000020426	0.0887085	0.531922	0.956004	490.842	453.666	443.241	421.196	502.267	475.252	MNAT1
ENSG00000020577	-0.811331	0.122284	NA	6.21318	14.8029	18.9509	20.8404	19.1174	43.2047	SAMD4A
ENSG00000020633	-0.675064	0.0414417	0.559148	4104.43	5502.33	2716.3	6500.02	2794.62	3349.26	RUNX3
ENSG00000020922	-0.0796755	0.552284	0.959969	811.442	842.024	741.192	753.547	823.787	914.5	MRE11
ENSG00000021300	-0.0597649	0.844208	0.987024	38.5217	53.9871	45.2717	50.4558	64.304	51.3056	PLEKHB1
ENSG00000021355	-0.274652	0.0526625	0.601022	908.368	990.924	675.917	982.791	800.325	909.099	SERPINB1
ENSG00000021574	-0.189275	0.231274	0.860129	545.518	686.158	487.46	487.008	561.357	642.67	SPAST
ENSG00000021762	-0.35816	0.0467579	0.57767	3005.94	3624.1	3799.66	5795.84	3193.48	3400.57	OSBPL5
ENSG00000021776	-0.0472908	0.700629	0.972358	1571.94	1664.02	1482.38	1424.83	1414.69	1525.67	AQR
ENSG00000021826	0.292719	0.56666	NA	14.9116	14.8029	18.9509	13.1624	14.7725	11.7013	CPS1
ENSG00000022267	-0.126537	0.428942	0.931432	295.748	274.289	256.89	321.382	268.513	300.633	FHL1
ENSG00000022277	0.000648725	0.995586	0.999429	2978.6	2784.69	2792.1	2885.85	2559.13	2653.49	RTF2
ENSG00000022556	-0.00509985	0.980313	0.998855	155.33	128.872	129.498	163.433	177.271	172.819	NLRP2
ENSG00000022567	0.147002	0.300725	0.890986	1031.39	918.651	1201.28	1044.22	920.243	884.796	SLC45A4
ENSG00000022840	0.0740999	0.50548	0.949967	3239.55	3000.64	2943.71	2936.31	3230.84	3005.43	RNF10
ENSG00000022976	0.0420291	0.794295	0.982669	272.137	253.391	299.004	265.441	253.74	281.731	ZNF839
ENSG00000023041	0.396371	0.0103627	0.339523	1506.08	1084.97	1343.41	841.296	1374.72	1279.94	ZDHHC6
ENSG00000023171	0.0565562	0.69095	0.971196	708.303	782.813	884.377	802.905	756.876	675.073	GRAMD1B
ENSG00000023191	0.0957488	0.451851	0.93829	8155.43	7299.58	8972.22	8871.45	7765.15	7125.18	RNH1
ENSG00000023228	-0.0786329	0.487395	0.94489	2233.02	2328.41	2029.86	2215.67	2161.14	2238.54	NDUFS1
ENSG00000023287	-0.282944	0.0586826	0.622878	1299.8	1658.8	1070.73	1288.82	1415.56	1657.98	RB1CC1
ENSG00000023318	-0.0882472	0.520906	0.953226	2339.89	2382.4	1749.8	2061.01	2178.52	2217.84	ERP44
ENSG00000023330	-0.188816	0.113374	0.74615	1750.88	1850.36	1695.06	2133.4	1686.68	1867.7	ALAS1
ENSG00000023445	0.570077	0.0886948	0.694971	41.007	26.1228	54.7472	31.8091	43.4487	36.0039	BIRC3
ENSG00000023516	0.217053	0.174141	0.818457	1184.23	1307.01	1278.14	822.649	1256.54	1067.52	AKAP11
ENSG00000023572	0.335248	0.0316799	0.515792	346.696	267.323	340.064	243.504	324.127	288.931	GLRX2
ENSG00000023608	-0.0876838	0.60647	0.966212	203.792	230.751	207.407	202.92	219.85	236.726	SNAPC1
ENSG00000023697	-0.216462	0.163245	0.806273	309.417	342.208	280.053	352.094	338.031	384.342	DERA
ENSG00000023734	0.0601215	0.636898	0.967532	1491.16	1422.82	1269.71	1238.36	1449.45	1375.35	STRAP
ENSG00000023839	-0.774619	0.125034	NA	7.45582	22.6397	15.7924	16.453	13.0346	23.4025	ABCC2
ENSG00000023892	0.0181517	0.890968	0.991944	2375.92	2381.53	2791.05	2947.28	2621.69	2366.36	DEF6
ENSG00000023902	-0.417611	0.340613	0.907505	689.663	789.779	322.166	708.575	405.811	394.243	PLEKHO1
ENSG00000023909	-0.064234	0.737164	0.976633	3483.11	3742.52	3335.37	2954.96	4738.51	5386.19	GCLM
ENSG00000024048	0.152157	0.291309	0.887832	1704.9	1661.41	1655.05	1192.29	1636.28	1639.08	UBR2
ENSG00000024422	0.249973	0.105395	0.728552	570.37	469.339	485.355	443.134	651.73	523.857	EHD2
ENSG00000024526	-0.115536	0.536487	0.957369	456.048	509.394	505.358	489.202	649.123	747.981	DEPDC1
ENSG00000024862	-0.23014	0.122327	0.761981	431.195	467.598	391.653	540.755	486.625	530.158	CCDC28A
ENSG00000025039	0.0873575	0.5939	0.966212	712.031	626.076	492.724	521.011	680.406	625.568	RRAGD
ENSG00000025156	-0.0912544	0.505371	0.949967	483.386	538.129	540.102	580.242	557.881	568.862	HSF2
ENSG00000025293	0.143166	0.303748	0.892023	1082.34	1166.82	1124.42	865.427	1142.7	999.109	PHF20
ENSG00000025423	0.346464	0.383934	0.917623	19.8822	21.769	35.7962	31.8091	41.7107	24.3026	HSD17B6
ENSG00000025434	0.166262	0.303171	0.89146	331.784	296.058	364.279	371.837	375.397	289.832	NR1H3
ENSG00000025708	0.0174534	0.902047	0.993741	1046.3	929.1	1202.33	1243.85	1089.69	1127.82	TYMP
ENSG00000025770	-0.0493227	0.7207	0.975935	1902.48	1820.76	2094.08	2428.46	1938.68	1895.61	NCAPH2
ENSG00000025772	0.182716	0.266656	0.880394	535.576	443.217	666.441	643.86	656.944	554.46	TOMM34
ENSG00000025796	-0.0704089	0.595009	0.966212	6142.35	6313.01	4967.25	5292.38	6081.08	6442.9	SEC63
ENSG00000025800	-0.136563	0.235304	0.861347	2076.45	2279.65	1928.78	2081.85	2041.22	2283.55	KPNA6
ENSG00000026025	-0.370341	0.0264896	0.485687	5212.86	6848.52	4121.83	6872.96	7115.16	7546.42	VIM
ENSG00000026036	0.130991	0.592559	0.966212	108.109	94.9128	158.977	148.077	106.884	99.9109	RTEL1-TNFRSF6B
ENSG00000026103	-0.0719099	0.877409	NA	13.669	20.8982	25.2679	13.1624	21.7243	29.7032	FAS
ENSG00000026297	-0.062911	0.620671	0.966212	6579.76	6385.28	5952.7	7339.13	6037.63	5674.22	RNASET2
ENSG00000026508	-0.458578	0.00299523	0.21528	3256.95	4202.28	2131.98	3610.88	2923.23	3606.69	CD44
ENSG00000026559	0.398274	0.0202112	0.44319	595.223	397.066	485.355	425.584	424.059	317.735	KCNG1
ENSG00000026652	-0.291105	0.115625	0.752867	181.425	247.296	171.611	221.567	178.14	180.92	AGPAT4
ENSG00000026751	0.15096	0.636626	0.967532	45.9776	40.0549	45.2717	38.3903	37.3659	36.904	SLAMF7
ENSG00000026950	0.149494	0.583154	0.966005	60.8892	53.9871	86.332	73.49	89.5043	87.3095	BTN3A1
ENSG00000027001	-0.174276	0.374646	0.914554	146.631	147.158	155.819	206.211	157.284	167.418	MIPEP
ENSG00000027075	0.100628	0.488845	0.94489	392.673	412.74	470.615	390.484	434.487	407.744	PRKCH
ENSG00000027644	0.266056	0.522969	NA	27.338	21.769	23.1623	16.453	25.2002	24.3026	INSRR
ENSG00000027697	-0.180697	0.155476	0.799933	2604.57	2926.62	2129.87	2787.14	2567.82	2562.58	IFNGR1
ENSG00000027847	0.162887	0.396423	0.921543	304.446	323.922	470.615	425.584	384.086	288.931	B4GALT7
ENSG00000027869	-0.293723	0.164018	0.807441	187.638	200.275	181.087	293.96	273.727	297.032	SH2D2A
ENSG00000028116	-0.167849	0.264976	0.880253	631.26	755.819	583.268	595.598	694.31	792.086	VRK2
ENSG00000028137	-0.0472834	0.763417	0.97836	4047.27	4040.32	3229.03	3890.58	3119.61	2809.21	TNFRSF1B
ENSG00000028203	0.129981	0.366712	0.914544	487.114	410.128	481.143	429.971	413.631	421.246	VEZT
ENSG00000028277	-0.414809	0.0159513	0.407707	453.562	538.129	497.989	839.102	531.812	604.866	POU2F2
ENSG00000028310	-0.0807331	0.498006	0.948374	4367.87	4516.63	4508.22	5051.07	4130.23	4188.16	BRD9
ENSG00000028528	0.130597	0.275401	0.881208	1892.54	1767.64	2100.4	1690.27	1846.57	1874.9	SNX1
ENSG00000028839	0.142583	0.392816	0.921543	391.431	348.304	347.434	269.829	368.445	382.542	TBPL1
ENSG00000029153	0.298913	0.0710337	0.657123	386.46	322.181	384.283	259.957	406.68	373.541	ARNTL2
ENSG00000029363	-0.37981	0.00610251	0.293201	7355.17	9820.42	5686.33	7649.54	6878.79	8446.52	BCLAF1
ENSG00000029364	-0.202087	0.138965	0.780454	2214.38	2648.85	1962.47	2037.98	1849.18	2240.34	SLC39A9
ENSG00000029534	-0.124684	0.606006	0.966212	68.345	81.8514	76.8566	92.1367	91.2422	85.5093	ANK1
ENSG00000029639	0.534212	0.0176084	0.42711	152.844	123.648	268.472	144.786	227.671	180.92	TFB1M
ENSG00000029725	0.213026	0.149076	0.798692	1027.66	920.393	893.853	683.347	992.368	907.299	RABEP1
ENSG00000029993	-0.245864	0.0518344	0.595767	2603.32	2979.74	2631.02	3263.17	3050.97	3585.09	HMGB3
ENSG00000030066	-0.0737176	0.550919	0.959494	2023.01	2444.22	2369.92	2146.57	2294.96	2448.27	NUP160
ENSG00000030110	0.206108	0.103138	0.723244	1732.24	1428.05	1669.79	1519.16	1492.9	1295.24	BAK1
ENSG00000030582	-0.115029	0.443676	0.935442	12534.5	12841.1	10503	13030.8	9580.43	9451.03	GRN
ENSG00000031003	-0.307932	0.022795	0.459857	1554.54	2088.95	1353.94	1642.01	1473.78	1691.28	FAM13B
ENSG00000031081	-0.311114	0.148129	0.797981	395.159	485.884	212.672	423.39	425.797	373.541	ARHGAP31
ENSG00000031691	-0.15288	0.369052	0.914544	449.835	431.026	302.162	372.934	365.838	435.647	CENPQ
ENSG00000031698	0.199342	0.149791	0.798692	3435.89	2890.92	2674.19	2289.16	2957.99	2713.8	SARS
ENSG00000031823	-0.0875915	0.493841	0.945986	1665.13	1759.8	1711.9	1812.02	1446.84	1552.67	RANBP3
ENSG00000032219	-0.179278	0.182083	0.82872	823.868	868.147	710.66	804.002	788.159	955.904	ARID4A
ENSG00000032389	0.071243	0.594236	0.966212	883.515	835.929	884.377	963.048	929.802	771.384	EIPR1
ENSG00000032444	0.121454	0.312188	0.894907	2369.71	2122.91	2629.97	2412.01	2310.6	2186.34	PNPLA6
ENSG00000032742	-0.0892273	0.6078	0.966212	207.52	248.166	216.883	232.535	269.382	259.228	IFT88
ENSG00000033011	0.149828	0.316271	0.897784	500.783	431.026	576.951	516.624	470.984	449.149	ALG1
ENSG00000033030	0.226009	0.127745	0.76501	630.017	518.102	552.736	446.424	627.399	581.463	ZCCHC8
ENSG00000033050	0.234277	0.0726818	0.66008	2378.41	1965.3	2197.26	1708.92	1884.8	1813.7	ABCF2
ENSG00000033100	0.0485415	0.688195	0.971196	2088.87	2021.9	2270.95	2200.31	1989.95	1918.11	CHPF2
ENSG00000033170	0.117502	0.376139	0.914749	1281.16	1145.92	1111.79	1014.6	1291.29	1234.03	FUT8
ENSG00000033178	-0.0208394	0.884731	0.991372	929.492	1080.61	964.392	853.361	1102.73	1106.22	UBA6
ENSG00000033327	0.00337216	0.981451	0.998855	1000.32	1031.85	862.268	839.102	826.394	808.288	GAB2
ENSG00000033627	0.0145015	0.911487	0.99377	1187.96	1282.63	1145.48	1031.05	1120.11	1102.62	ATP6V0A1
ENSG00000033800	-0.0907788	0.517291	0.95179	1878.87	2068.05	1659.26	1535.61	1600.65	1864.1	PIAS1
ENSG00000033867	0.819064	0.000432996	0.0763122	190.123	111.457	297.951	109.687	225.064	182.72	SLC4A7
ENSG00000034053	-0.150591	0.333928	0.905245	872.331	879.467	878.06	1190.1	836.821	804.688	APBA2
ENSG00000034152	0.0808768	0.560132	0.963078	837.537	768.01	904.381	888.461	769.911	719.178	MAP2K3
ENSG00000034510	0.00455197	0.968601	0.998855	8384.07	7516.39	7349.81	8279.14	7500.11	7364.6	TMSB10
ENSG00000034533	-0.049984	0.748803	0.976753	333.027	323.052	311.638	295.057	294.582	351.938	ASTE1
ENSG00000034677	-0.132556	0.254248	0.872547	1317.2	1546.47	1376.05	1479.67	1436.41	1502.26	RNF19A
ENSG00000034693	0.141846	0.406391	0.923518	223.675	222.044	229.517	230.342	271.12	206.122	PEX3
ENSG00000034713	0.130487	0.331611	0.905222	1412.88	1192.94	1143.37	1113.32	1388.62	1296.14	GABARAPL2
ENSG00000035115	0.107544	0.504021	0.949967	318.115	308.249	300.057	261.054	345.851	324.935	SH3YL1
ENSG00000035141	0.0162664	0.892241	0.992112	1378.08	1439.37	1389.74	1253.72	1346.04	1372.65	FAM136A
ENSG00000035403	0.0709233	0.528354	0.956004	2967.42	2766.4	2775.26	2779.46	3109.19	2882.11	VCL
ENSG00000035499	-0.0074403	0.962005	0.998855	535.576	556.415	629.592	561.595	668.241	726.379	DEPDC1B
ENSG00000035664	-0.104016	0.760765	0.97836	32.3086	29.6058	42.1132	46.0683	34.7589	42.3046	DAPK2
ENSG00000035681	-0.0105853	0.9434	0.997043	5410.44	5390	3896.52	4061.69	4618.59	4572.5	NSMAF
ENSG00000035687	0.207056	0.117643	0.75774	1269.97	1132.86	1168.64	952.079	1322.58	1171.93	ADSS
ENSG00000035720	-0.55575	0.325406	NA	4.97055	20.8982	8.42264	20.8404	33.89	29.7032	STAP1
ENSG00000035862	-0.232147	0.0671651	0.647791	1952.18	2378.04	1661.37	2086.24	1923.91	2038.72	TIMP2
ENSG00000035928	-0.154699	0.210481	0.847363	2037.92	2336.25	1859.3	1942.55	1849.18	2114.33	RFC1
ENSG00000036054	-0.241784	0.129528	0.766069	770.435	962.189	673.811	705.284	828.132	1018.01	TBC1D23
ENSG00000036257	-0.121783	0.435532	0.934958	2255.39	2448.58	1579.24	1884.41	2184.6	2214.24	CUL3
ENSG00000036530	0.464752	0.295065	0.889849	38.5217	33.0889	24.2151	10.9687	26.9382	19.8022	CYP46A1
ENSG00000036549	0.00177374	0.990259	0.998903	1502.35	1559.53	1341.31	1153.9	1469.43	1591.37	AC118549.1
ENSG00000036672	0.0502293	0.784714	0.981751	255.983	205.499	283.211	306.025	294.582	296.132	USP2
ENSG00000037042	-0.0877532	0.649549	0.967813	154.087	162.832	202.143	216.082	190.305	204.322	TUBG2
ENSG00000037241	0.204806	0.167945	0.811361	570.37	439.733	583.268	499.074	464.901	464.451	RPL26L1
ENSG00000037280	0.151421	0.782668	NA	12.4264	14.8029	14.7396	14.2593	13.9036	8.10088	FLT4
ENSG00000037474	0.0194098	0.863927	0.988729	6850.66	6798.02	6303.29	6175.35	6168.84	6088.26	NSUN2
ENSG00000037637	0.0477774	0.710605	0.975149	810.199	843.766	844.37	798.518	795.98	728.179	FBXO42
ENSG00000037749	-0.168038	0.34969	0.907738	323.086	436.25	402.181	301.638	309.355	422.146	MFAP3
ENSG00000037757	0.152935	0.2931	0.888137	574.098	540.742	678.022	597.792	563.964	495.954	MRI1
ENSG00000037897	0.110991	0.506071	0.949967	545.518	461.502	544.313	508.946	395.383	403.244	METTL1
ENSG00000038002	0.052658	0.698364	0.972338	540.547	506.782	494.83	496.88	551.798	526.557	AGA
ENSG00000038210	-0.10634	0.50401	0.949967	328.056	343.079	293.74	367.45	384.955	375.341	PI4K2B
ENSG00000038219	-0.231867	0.104702	0.728131	2231.78	2783.82	1880.35	2017.14	2146.36	2545.48	BOD1L1
ENSG00000038274	0.0778934	0.551492	0.959574	1347.02	1266.95	1283.4	1123.19	1393.83	1421.25	MAT2B
ENSG00000038358	-0.0300507	0.832724	0.987024	2368.47	2471.22	2958.45	2952.76	2283.66	2348.36	EDC4
ENSG00000038382	0.0995025	0.615656	0.966212	136.69	139.321	166.347	126.14	138.167	145.816	TRIO
ENSG00000038427	-0.0263629	0.870572	0.988903	2032.95	2410.26	1717.17	1568.52	2221.97	2101.73	VCAN
ENSG00000038532	0.219502	0.130607	0.768107	775.405	785.425	921.226	733.803	785.552	612.967	CLEC16A
ENSG00000038945	-0.0604474	0.872799	0.988916	27.338	40.0549	26.3207	25.2279	35.6279	27.903	MSR1
ENSG00000039123	0.11615	0.468144	0.939682	3004.7	2795.14	2328.86	1948.03	2904.98	2855.11	MTREX
ENSG00000039319	-0.087007	0.674706	0.969428	497.055	597.341	401.128	310.413	494.446	568.862	ZFYVE16
ENSG00000039523	-0.0449101	0.819069	0.985693	155.33	146.288	144.238	156.852	126.87	135.915	RIPOR1
ENSG00000039560	0.149282	0.354199	0.909137	494.569	530.292	468.509	392.678	591.771	478.852	RAI14
ENSG00000039650	-0.154829	0.257062	0.873207	769.192	882.079	918.068	1000.34	775.124	860.494	PNKP
ENSG00000040199	-0.00578932	0.97964	0.998855	84.4993	92.3005	110.547	96.5242	93.8491	101.711	PHLPP2
ENSG00000040275	0.081315	0.588259	0.966195	1164.35	1056.23	1112.84	961.951	1297.38	1360.05	SPDL1
ENSG00000040341	0.14016	0.299717	0.890986	1458.86	1304.4	1479.23	1187.91	1541.56	1571.57	STAU2
ENSG00000040487	-0.126451	0.438719	0.934958	738.126	747.112	912.803	1097.96	775.993	807.388	PQLC2
ENSG00000040531	-0.22554	0.20759	0.844382	214.976	286.48	238.992	262.151	198.995	214.223	CTNS
ENSG00000040608	-0.154255	0.661056	0.96914	34.7938	30.4766	55.8	77.8774	49.5315	49.5054	RTN4R
ENSG00000040633	0.0406972	0.7921	0.982669	525.635	412.74	486.407	559.401	467.508	467.151	PHF23
ENSG00000040933	-0.0288204	0.824402	0.986071	915.823	1055.36	1050.72	935.626	915.898	948.703	INPP4A
ENSG00000041353	-0.248788	0.296513	0.890587	129.234	171.54	114.758	104.202	153.808	196.221	RAB27B
ENSG00000041357	0.0316431	0.782076	0.981637	3473.17	3271.44	3240.61	3191.88	3551.49	3578.79	PSMA4
ENSG00000041802	-0.00566527	0.966778	0.998855	1676.32	1723.23	1449.75	1361.21	1417.3	1472.56	LSG1
ENSG00000041880	0.0944727	0.64693	0.967532	120.536	117.553	147.396	150.271	152.07	127.814	PARP3
ENSG00000041982	0.336129	0.5013	NA	24.8527	27.8643	23.1623	7.67806	17.3795	15.3017	TNC
ENSG00000041988	0.0623662	0.713489	0.975149	287.049	257.745	315.849	258.86	236.361	285.331	THAP3
ENSG00000042062	-1.16748	0.0725197	NA	4.97055	13.9321	5.26415	9.87179	7.82076	17.1019	RIPOR3
ENSG00000042088	-0.1072	0.428479	0.931432	673.509	660.036	701.185	812.777	694.31	757.882	TDP1
ENSG00000042286	-0.178329	0.25611	0.872547	484.628	631.301	661.177	682.25	674.323	749.782	AIFM2
ENSG00000042317	0.0252453	0.902963	0.993741	141.661	117.553	131.604	120.655	128.608	155.717	SPATA7
ENSG00000042429	-0.0474892	0.727005	0.976633	709.546	675.709	715.924	671.282	632.613	777.685	MED17
ENSG00000042445	0.0877538	0.604358	0.966212	226.16	202.887	229.517	223.761	252.871	241.226	RETSAT
ENSG00000042493	0.0477112	0.754432	0.978248	13154.6	11556.7	12660.3	13883	10251.3	9452.83	CAPG
ENSG00000042753	-0.0462517	0.724042	0.976633	2373.44	2223.92	2380.45	2878.17	2401.84	2289.85	AP2S1
ENSG00000042832	0.437186	0.155317	0.799933	59.6466	53.9871	53.6943	29.6154	64.304	46.8051	TG
ENSG00000042980	0.1241	0.667916	0.96914	219.947	205.499	133.709	74.5868	161.629	189.921	ADAM28
ENSG00000043093	-0.106636	0.507215	0.949967	724.457	835.929	646.438	623.02	815.097	893.797	DCUN1D1
ENSG00000043143	0.129285	0.376537	0.914819	642.443	572.089	776.988	730.512	693.441	631.869	JADE2
ENSG00000043355	-0.0596078	0.658698	0.96914	1153.17	1080.61	1265.5	1397.41	1154	1247.54	ZIC2
ENSG00000043462	-0.216569	0.0683546	0.650509	2098.81	2305.77	1801.39	2345.1	1969.96	2169.24	LCP2
ENSG00000043514	0.111538	0.337675	0.906788	1904.96	1778.09	1769.81	1719.89	1837.88	1603.97	TRIT1
ENSG00000043591	-0.0287141	0.836306	0.987024	1860.23	1847.75	1406.58	1708.92	1767.49	1577.87	ADRB1
ENSG00000044090	0.0475133	0.707761	0.974586	811.442	789.779	889.641	852.264	809.883	788.486	CUL7
ENSG00000044115	-0.0935449	0.394717	0.921543	4676.04	4976.39	4272.38	4748.33	4499.54	4622.9	CTNNA1
ENSG00000044446	-0.152872	0.267292	0.880876	668.539	727.084	776.988	805.099	626.53	771.384	PHKA2
ENSG00000044459	0.0105834	0.938706	0.996967	735.641	760.173	658.019	653.732	784.683	747.981	CNTLN
ENSG00000044574	-0.137448	0.25385	0.872547	13838	14845.6	11288.4	13252.3	12825.2	13644.6	HSPA5
ENSG00000046604	-0.126021	0.369586	0.914544	577.826	720.118	714.871	777.678	721.248	703.877	DSG2
ENSG00000046647	0.301469	0.11022	0.738987	187.638	141.934	214.777	151.367	178.14	177.319	GEMIN8
ENSG00000046651	-0.160325	0.245449	0.868653	551.731	616.498	583.268	723.931	619.578	623.768	OFD1
ENSG00000046653	0.104938	0.716906	0.975219	44.7349	49.6333	58.9585	50.4558	56.4833	49.5054	GPM6B
ENSG00000047056	-0.27366	0.0322742	0.518102	1185.48	1477.68	1231.81	1594.84	1187.02	1286.24	WDR37
ENSG00000047188	0.217696	0.182896	0.82872	667.296	651.328	718.03	444.231	662.158	662.472	YTHDC2
ENSG00000047230	0.35599	0.0395095	0.55497	274.623	245.554	330.589	209.501	335.424	279.93	CTPS2
ENSG00000047249	0.0269415	0.838042	0.987024	917.066	839.412	749.615	825.94	863.76	817.289	ATP6V1H
ENSG00000047315	-0.116401	0.351847	0.908366	4508.29	5029.51	3941.8	4067.18	4051.15	4450.98	POLR2B
ENSG00000047346	-0.292218	0.168805	0.811361	96.9257	143.675	124.234	127.236	132.084	162.918	FAM214A
ENSG00000047365	0.300595	0.272509	0.880876	129.234	89.6882	81.0679	64.7151	70.3869	71.1077	ARAP2
ENSG00000047410	-0.0267095	0.816446	0.985469	4584.09	5067.82	4785.11	4321.65	4680.29	4920.84	TPR
ENSG00000047578	-0.111071	0.461869	0.939682	508.238	557.286	494.83	525.399	419.714	451.849	KIAA0556
ENSG00000047579	-0.0200741	0.918661	0.994292	243.557	188.084	168.453	222.664	174.664	182.72	DTNBP1
ENSG00000047597	0.101247	0.586522	0.966075	267.167	273.418	220.041	186.467	266.775	241.226	XK
ENSG00000047621	0.297263	0.0539257	0.603977	426.224	348.304	364.279	290.669	409.287	335.737	C12orf4
ENSG00000047634	0.0262206	0.960271	NA	16.1543	13.9321	11.5811	14.2593	13.9036	12.6014	SCML1
ENSG00000047644	-0.123585	0.460275	0.939682	247.285	293.446	335.853	333.447	279.809	315.034	WWC3
ENSG00000047648	0.314154	0.603747	NA	8.69846	12.1906	18.9509	7.67806	9.55871	9.90108	ARHGAP6
ENSG00000047662	0.189408	0.689612	NA	13.669	15.6737	18.9509	19.7436	24.3313	15.3017	FAM184B
ENSG00000047849	-0.0691086	0.532782	0.956004	3290.5	3537.9	3093.21	3303.76	3244.75	3258.35	MAP4
ENSG00000047932	0.203319	0.183107	0.82872	1995.67	1890.42	2039.33	1351.34	2078.58	2065.72	GOPC
ENSG00000047936	0.174792	0.509373	0.950794	77.0435	87.0759	118.97	118.461	166.843	118.813	ROS1
ENSG00000048028	0.295073	0.167525	0.811164	145.389	130.614	182.14	104.202	162.498	163.818	USP28
ENSG00000048052	-0.185283	0.121921	0.761981	1400.45	1792.02	1518.18	1677.11	1615.42	1688.58	HDAC9
ENSG00000048140	0.0270746	0.849782	0.987732	1164.35	1099.77	1180.22	1240.55	995.844	937.902	TSPAN17
ENSG00000048162	0.314106	0.0124652	0.371994	1246.36	968.284	1214.97	940.014	1065.36	926.201	NOP16
ENSG00000048342	-0.130224	0.793549	NA	12.4264	23.5105	24.2151	15.3561	13.0346	15.3017	CC2D2A
ENSG00000048392	-0.461295	0.0023925	0.194879	1887.57	2660.17	1371.84	2014.94	1721.44	2179.14	RRM2B
ENSG00000048405	-0.0728637	0.577599	0.966005	837.537	956.965	809.626	843.49	821.18	794.786	ZNF800
ENSG00000048471	-0.0833681	0.640777	0.967532	233.616	290.834	276.894	267.635	222.457	217.824	SNX29
ENSG00000048544	0.0503594	0.674764	0.969428	2290.18	2266.59	2083.55	1948.03	2115.95	2049.52	MRPS10
ENSG00000048649	-0.0747436	0.563932	0.964713	1636.55	1778.09	1562.4	1445.67	1594.57	1821.8	RSF1
ENSG00000048707	0.174483	0.252473	0.872547	1163.11	1157.24	1159.17	898.333	955.871	846.092	VPS13D
ENSG00000048740	-0.306878	0.00781828	0.316485	3355.12	4223.18	3688.06	4652.9	3833.91	4583.3	CELF2
ENSG00000048828	0.217645	0.0696433	0.654869	3781.34	3552.7	4287.12	3124.97	3965.13	3669.7	FAM120A
ENSG00000048991	0.0120371	0.92678	0.99557	900.912	958.706	845.422	791.937	901.126	873.095	R3HDM1
ENSG00000049089	-0.113819	0.439927	0.934958	21276.4	22808.7	21907.3	24411.8	16884.2	17776.9	COL9A2
ENSG00000049130	-0.396594	0.0349526	0.53339	552.973	865.535	499.041	560.498	713.427	898.298	KITLG
ENSG00000049167	0.0133236	0.950626	0.997043	152.844	172.41	125.287	111.88	159.022	147.616	ERCC8
ENSG00000049192	0.207019	0.735864	NA	14.9116	6.09532	10.5283	15.3561	9.55871	9.00098	ADAMTS6
ENSG00000049239	-0.169887	0.312612	0.895235	2009.34	2223.92	2533.11	3166.65	2031.66	2008.12	H6PD
ENSG00000049245	-0.112209	0.455483	0.939178	1282.4	1249.54	908.592	1067.25	993.237	1120.62	VAMP3
ENSG00000049246	0.214244	0.347629	0.907505	100.654	126.26	130.551	87.7492	133.822	100.811	PER3
ENSG00000049247	0.103942	0.528293	0.956004	287.049	234.234	257.943	251.182	236.361	240.326	UTS2
ENSG00000049323	-0.151303	0.616625	0.966212	80.7714	90.559	52.6415	48.2621	52.1384	64.8071	LTBP1
ENSG00000049449	0.0917401	0.54808	0.959433	1481.22	1273.92	1100.21	1044.22	1374.72	1391.55	RCN1
ENSG00000049541	-0.1061	0.405329	0.923195	1196.66	1198.16	1165.48	1429.22	1181.8	1189.03	RFC2
ENSG00000049618	0.145548	0.228023	0.857558	2613.27	2676.71	3056.37	2579.83	2756.38	2361.86	ARID1B
ENSG00000049656	0.192129	0.0787828	0.672466	8090.81	6922.54	8546.87	7659.41	8063.21	7040.57	CLPTM1L
ENSG00000049759	0.259475	0.121121	0.761975	340.482	329.147	333.747	251.182	319.782	248.427	NEDD4L
ENSG00000049769	0.108541	0.558799	0.962136	288.292	238.588	230.57	213.889	196.388	207.923	PPP1R3F
ENSG00000049860	0.0552873	0.71887	0.975886	2825.76	2573.96	2009.85	1954.61	2194.16	2232.24	HEXB
ENSG00000049883	0.353199	0.0637697	0.634756	269.652	192.438	279	175.498	274.596	275.43	PTCD2
ENSG00000050030	0.0360938	0.894403	0.992553	67.1024	87.0759	145.291	100.912	116.442	134.115	NEXMIF
ENSG00000050130	0.019241	0.891016	0.991944	685.936	664.389	603.272	581.339	693.441	709.277	JKAMP
ENSG00000050165	-0.331992	0.606599	NA	14.9116	8.70759	3.15849	15.3561	10.4277	11.7013	DKK3
ENSG00000050327	-0.244749	0.25522	0.872547	103.139	105.362	107.389	137.108	99.932	126.014	ARHGEF5
ENSG00000050344	-0.380077	0.0542721	0.60586	126.749	191.567	120.023	157.949	151.201	169.218	NFE2L3
ENSG00000050393	-0.0476667	0.73443	0.976633	497.055	511.136	443.241	471.652	455.342	458.15	MCUR1
ENSG00000050405	0.307503	0.0253142	0.473974	1164.35	963.931	1003.35	764.515	1105.33	913.599	LIMA1
ENSG00000050426	-0.0751968	0.553994	0.960689	684.693	745.37	690.656	737.094	750.793	758.783	LETMD1
ENSG00000050438	-0.170312	0.516822	0.95179	73.3156	68.79	54.7472	65.8119	64.304	81.0088	SLC4A8
ENSG00000050555	-0.118676	0.585209	0.966005	224.917	246.425	146.343	206.211	187.698	153.017	LAMC3
ENSG00000050628	0.119832	0.769433	NA	22.3675	24.3813	25.2679	28.5185	28.6761	18.002	PTGER3
ENSG00000050748	-0.0581331	0.641458	0.967532	1824.19	1839.91	1516.08	1644.2	1697.11	1757.89	MAPK9
ENSG00000050767	-0.287196	0.0902399	0.698068	1160.62	1311.36	887.536	1287.72	835.084	916.3	COL23A1
ENSG00000050820	0.169018	0.34651	0.907505	464.746	425.801	688.551	613.148	642.171	561.661	BCAR1
ENSG00000051009	-0.0558649	0.715297	0.975219	1061.21	1217.32	1187.59	1059.57	858.546	950.503	FAM160A2
ENSG00000051108	-0.177944	0.315556	0.897088	2106.27	2298.8	1329.72	1612.39	1546.77	1720.99	HERPUD1
ENSG00000051128	0.0278633	0.842592	0.987024	5615.48	5109.62	5787.41	6391.43	4997.47	4586.9	HOMER3
ENSG00000051180	-0.140098	0.297694	0.890986	764.222	776.717	698.026	916.98	788.159	788.486	RAD51
ENSG00000051341	0.305291	0.0595541	0.626103	779.133	767.139	1132.84	655.926	904.601	855.993	POLQ
ENSG00000051382	-0.0724567	0.634129	0.967532	4466.04	4888.44	3570.15	3426.61	3532.38	3844.32	PIK3CB
ENSG00000051523	0.116248	0.343002	0.907505	13802	11654.2	11651.7	11972.3	11473.1	10439.3	CYBA
ENSG00000051596	0.28353	0.0175111	0.426605	1122.1	911.685	1158.11	945.498	1162.69	972.106	THOC3
ENSG00000051620	0.0564562	0.666957	0.96914	2654.27	2407.65	3067.95	3069.03	2981.45	2896.52	HEBP2
ENSG00000051825	0.123297	0.409036	0.923652	644.929	676.58	723.294	557.208	779.469	738.08	MPHOSPH9
ENSG00000052126	-0.00081706	0.997484	0.999508	65.8598	63.5654	71.5924	75.6837	89.5043	89.1097	PLEKHA5
ENSG00000052723	-0.0417308	0.726169	0.976633	2077.69	2339.73	2068.81	1969.97	2143.76	2163.84	SIKE1
ENSG00000052749	0.178249	0.183049	0.82872	1897.51	1841.66	2150.93	1692.46	1698.84	1543.67	RRP12
ENSG00000052795	0.48259	0.00928038	0.335579	285.806	242.071	379.019	184.273	287.63	253.828	FNIP2
ENSG00000052802	-0.176344	0.282271	0.886617	287.049	310.861	267.419	343.319	344.982	364.54	MSMO1
ENSG00000052841	-0.0967198	0.452606	0.938374	2047.87	2192.57	1746.64	1863.57	1761.41	1881.2	TTC17
ENSG00000052850	0.253911	0.26597	0.880394	231.13	207.241	411.656	360.869	399.728	309.634	ALX4
ENSG00000053254	-0.280197	0.0294054	0.507681	2505.16	3139.96	2233.05	2737.78	2179.39	2519.37	FOXN3
ENSG00000053371	0.0995934	0.478887	0.942859	1591.82	1314.85	1746.64	1820.8	1626.72	1501.36	AKR7A2
ENSG00000053372	0.206632	0.143399	0.787683	2189.53	1828.59	2221.47	2033.59	1821.37	1538.27	MRTO4
ENSG00000053438	-0.0722921	0.896766	NA	6.21318	17.4152	21.0566	9.87179	14.7725	17.1019	NNAT
ENSG00000053501	-0.168431	0.24643	0.869331	607.649	641.75	611.694	768.903	559.619	589.564	USE1
ENSG00000053524	-0.203831	0.512322	0.950974	44.7349	42.6672	35.7962	49.3589	40.8418	47.7052	MCF2L2
ENSG00000053702	-0.189827	0.729361	NA	9.94109	14.8029	12.634	15.3561	13.0346	10.8012	NRIP2
ENSG00000053747	0.174278	0.364047	0.91311	157.815	141.063	180.034	176.595	200.733	162.018	LAMA3
ENSG00000053770	-0.0695882	0.652092	0.96914	871.088	917.78	695.921	686.638	834.215	912.699	AP5M1
ENSG00000053900	0.0616408	0.612027	0.966212	974.227	941.291	964.392	888.461	986.285	972.106	ANAPC4
ENSG00000053918	-0.205089	0.32092	0.899879	1109.67	1097.16	674.864	1039.83	664.765	683.174	KCNQ1
ENSG00000054116	0.114935	0.364023	0.91311	1399.21	1185.97	1253.92	1146.22	1146.18	1172.83	TRAPPC3
ENSG00000054118	-0.290866	0.00682166	0.303118	4937	6185	4809.33	6135.87	5018.32	5742.62	THRAP3
ENSG00000054148	0.19805	0.128308	0.76501	1486.19	1176.4	1564.51	1500.51	1505.06	1297.04	PHPT1
ENSG00000054219	-0.174072	0.303168	0.89146	273.38	256.874	209.513	276.41	231.147	270.929	LY75
ENSG00000054267	-0.0797114	0.595507	0.966212	1968.34	2123.78	1677.16	1529.03	1877.85	2180.94	ARID4B
ENSG00000054277	0.0551405	0.814766	0.98514	105.624	102.75	102.124	78.9743	116.442	129.614	OPN3
ENSG00000054282	0.0772427	0.552827	0.959969	840.022	741.887	715.924	752.45	818.573	756.082	SDCCAG8
ENSG00000054392	0.206313	0.434019	0.934054	74.5582	53.9871	78.9622	62.5213	63.4351	71.1077	HHAT
ENSG00000054523	0.0445259	0.772997	0.979994	606.407	701.832	707.502	564.886	770.78	755.182	KIF1B
ENSG00000054598	-0.0827058	0.821939	0.985967	24.8527	26.9935	46.3245	37.2934	36.4969	50.4055	FOXC1
ENSG00000054611	-0.292792	0.0758056	0.664692	992.867	1138.08	915.962	1454.44	934.147	891.997	TBC1D22A
ENSG00000054690	0.313342	0.147561	0.797133	126.749	107.103	146.343	93.2336	110.36	107.112	PLEKHH1
ENSG00000054793	-0.205179	0.324159	0.900759	118.05	153.254	152.66	199.63	178.14	168.318	ATP9A
ENSG00000054965	0.232232	0.052633	0.601022	1189.2	1017.92	1210.75	1056.28	1166.16	962.205	FAM168A
ENSG00000054967	-0.051001	0.770889	0.979697	1365.66	1290.47	1350.78	1599.23	1023.65	984.707	RELT
ENSG00000054983	-0.0675711	0.64074	0.967532	606.407	680.063	665.388	628.504	730.807	791.186	GALC
ENSG00000055044	0.237861	0.0996342	0.717959	3612.35	2680.2	2520.47	2351.68	2867.61	2596.78	NOP58
ENSG00000055070	0.0454902	0.714312	0.975149	3705.54	3518.74	4106.04	3978.33	3428.97	3395.17	SZRD1
ENSG00000055118	-0.162396	0.635901	0.967532	27.338	39.1842	35.7962	52.6495	55.6143	43.2047	KCNH2
ENSG00000055130	0.188843	0.0929284	0.704322	2199.47	1947.02	2268.85	1950.23	2334.93	2072.03	CUL1
ENSG00000055147	0.187801	0.213528	0.84791	508.238	433.638	491.672	366.353	452.735	472.551	FAM114A2
ENSG00000055163	-0.0895866	0.699605	0.972338	83.2567	82.7221	89.4905	95.4273	79.9456	90.9099	CYFIP2
ENSG00000055208	-0.218453	0.0864908	0.68972	1996.92	2289.23	1622.41	2075.27	1965.62	2132.33	TAB2
ENSG00000055211	-0.162847	0.219123	0.853882	1222.75	1300.04	973.868	1273.46	1151.39	1173.73	GINM1
ENSG00000055332	-0.235177	0.113505	0.746317	1473.77	1807.7	1556.08	1729.76	1907.4	2276.35	EIF2AK2
ENSG00000055483	0.0854276	0.488734	0.94489	2172.13	2088.08	2157.25	1987.52	1902.18	1795.7	USP36
ENSG00000055609	0.1087	0.512767	0.950974	2013.07	2408.52	2525.74	1962.29	1864.82	1567.07	KMT2C
ENSG00000055732	-0.110921	0.605604	0.966212	127.992	131.485	112.653	121.752	149.463	168.318	MCOLN3
ENSG00000055813	-0.0339784	0.930352	0.99557	23.6101	26.9935	42.1132	26.3248	25.2002	39.6043	CCDC85A
ENSG00000055917	-0.0134224	0.920946	0.994292	3716.73	4062.09	3401.69	2976.89	3351.63	3524.78	PUM2
ENSG00000055950	0.148061	0.303686	0.892023	1077.37	853.344	1042.3	1059.57	907.208	819.089	MRPL43
ENSG00000056050	0.166116	0.320141	0.899879	407.585	352.658	332.694	289.572	417.107	387.942	HPF1
ENSG00000056097	0.138676	0.268959	0.880876	8412.65	7588.67	9785	8317.53	9654.3	9395.22	ZFR
ENSG00000056277	-0.0330192	0.870144	0.988827	144.146	145.417	192.668	171.111	172.057	205.222	ZNF280C
ENSG00000056558	0.0786401	0.757357	0.978248	73.3156	67.0485	87.3849	65.8119	69.5179	84.6092	TRAF1
ENSG00000056586	0.0373432	0.776544	0.980246	849.964	925.617	977.026	809.487	848.118	870.395	RC3H2
ENSG00000056736	-0.0198097	0.952453	0.997043	50.9481	58.3409	42.1132	39.4872	37.3659	33.3036	IL17RB
ENSG00000056972	0.073361	0.611748	0.966212	454.805	395.325	391.653	398.162	437.094	425.746	TRAF3IP2
ENSG00000056998	-0.0596727	0.73462	0.976633	229.888	282.126	270.577	315.897	299.796	239.426	GYG2
ENSG00000057019	0.171105	0.343076	0.907505	218.704	187.213	238.992	191.951	248.526	248.427	DCBLD2
ENSG00000057252	0.0723386	0.63489	0.967532	707.06	743.629	739.087	581.339	809.014	819.089	SOAT1
ENSG00000057294	-1.03089	0.0228105	NA	12.4264	33.0889	10.5283	23.0342	19.1174	30.6033	PKP2
ENSG00000057608	-0.00387746	0.978204	0.998855	10602.2	10206.2	7793.05	8092.67	9486.58	9654.45	GDI2
ENSG00000057657	-0.529474	0.0111876	0.352942	444.864	624.334	235.834	442.037	398.859	489.653	PRDM1
ENSG00000057663	0.0553926	0.693993	0.971196	1397.97	1220.8	1046.51	1069.44	1150.52	1165.63	ATG5
ENSG00000057704	0.137095	0.78962	NA	14.9116	11.3199	20.0038	10.9687	16.5105	24.3026	TMCC3
ENSG00000057757	-0.0314549	0.809888	0.984111	1103.46	1053.62	941.23	1061.77	949.788	943.303	PITHD1
ENSG00000057935	-0.136479	0.413373	0.92399	295.748	268.194	241.098	332.35	271.12	288.031	MTA3
ENSG00000058056	0.367413	0.0163277	0.411928	398.886	295.187	439.03	303.832	370.183	336.637	USP13
ENSG00000058063	-0.0631392	0.618132	0.966212	1947.21	2294.45	1928.78	1876.74	2173.3	2148.53	ATP11B
ENSG00000058091	-0.068395	0.656599	0.96914	280.836	305.637	311.638	316.994	283.285	296.132	CDK14
ENSG00000058262	0.0291418	0.778842	0.981368	9156.99	8952.28	9053.28	8920.81	8893.07	8687.75	SEC61A1
ENSG00000058272	-0.120001	0.383321	0.917608	1586.85	1805.95	1450.8	1406.18	1619.77	1847	PPP1R12A
ENSG00000058335	0.338622	0.425492	NA	32.3086	24.3813	17.8981	19.7436	28.6761	18.002	RASGRF1
ENSG00000058404	-0.356977	0.0902206	0.698068	165.271	188.084	146.343	252.279	149.463	151.216	CAMK2B
ENSG00000058453	0.0967696	0.62726	0.967532	459.776	404.903	528.521	502.364	325.865	321.335	CROCC
ENSG00000058600	0.254664	0.0566444	0.612843	1400.45	1206.87	1592.93	1102.35	1253.93	1248.44	POLR3E
ENSG00000058668	0.0155524	0.910613	0.99377	1621.64	1760.68	2051.97	2098.3	2103.78	1861.4	ATP2B4
ENSG00000058673	-0.220788	0.0407951	0.559148	3747.79	4468.74	3645.95	4239.38	3868.67	4416.78	ZC3H11A
ENSG00000058729	0.165714	0.304534	0.892206	811.442	741.016	629.592	521.011	733.414	673.273	RIOK2
ENSG00000058799	-0.0156588	0.898666	0.99267	915.823	915.168	847.528	887.364	926.326	916.3	YIPF1
ENSG00000058804	0.0525369	0.6924	0.971196	2506.4	2660.17	2652.08	2166.31	2803.31	2849.71	NDC1
ENSG00000058866	0.152094	0.3996	0.921543	259.711	216.819	301.109	308.219	271.989	226.825	DGKG
ENSG00000059122	0.14506	0.355128	0.909137	922.037	835.058	1206.54	1025.57	860.284	843.392	FLYWCH1
ENSG00000059145	-0.119526	0.501407	0.949967	458.533	542.483	740.139	678.96	563.964	695.776	UNKL
ENSG00000059377	0.168194	0.228318	0.857558	725.7	675.709	724.347	550.626	714.296	697.576	TBXAS1
ENSG00000059378	-0.0104399	0.951693	0.997043	360.365	363.107	415.868	492.493	506.612	441.048	PARP12
ENSG00000059573	0.244723	0.0680315	0.650509	1236.42	1058.84	1490.81	1198.87	1457.27	1276.34	ALDH18A1
ENSG00000059588	0.124423	0.27433	0.880876	2958.72	2842.16	3022.67	2523.89	2826.77	2712	TARBP1
ENSG00000059691	0.164899	0.288743	0.887832	301.961	289.092	340.064	276.41	298.058	272.73	GATB
ENSG00000059728	-0.420559	0.0142067	0.387335	284.564	392.712	236.887	289.572	245.051	340.237	MXD1
ENSG00000059758	-0.190212	0.227601	0.857531	557.944	692.254	459.034	505.655	549.191	586.864	CDK17
ENSG00000059769	-0.0345359	0.867909	0.988729	170.241	151.512	113.706	136.011	139.905	144.916	DNAJC25
ENSG00000059804	-0.158257	0.535996	0.957369	198.822	203.758	98.966	141.496	128.608	127.814	SLC2A3
ENSG00000059915	0.0806835	0.770156	0.979406	53.4334	50.504	72.6453	65.8119	61.6971	62.1068	PSD
ENSG00000060069	-0.13942	0.34933	0.907505	1036.36	1122.41	1160.22	1386.44	979.333	991.008	CTDP1
ENSG00000060138	0.113082	0.480253	0.943821	2228.05	2039.32	1495.02	1577.29	2071.63	1738.99	YBX3
ENSG00000060140	0.341171	0.570159	NA	7.45582	8.70759	9.47547	14.2593	26.9382	12.6014	STYK1
ENSG00000060237	0.115293	0.299311	0.890986	8370.4	8159.89	9184.89	8146.42	8263.07	7529.32	WNK1
ENSG00000060339	0.111516	0.420814	0.927876	4690.95	4288.49	4559.81	3485.84	4536.91	4984.74	CCAR1
ENSG00000060491	-0.0201304	0.889378	0.991944	2703.98	2658.43	2599.44	2879.27	2217.62	2088.23	OGFR
ENSG00000060558	-0.295282	0.0444925	0.568528	1100.98	1214.71	977.026	1547.68	1074.92	1108.92	GNA15
ENSG00000060642	0.247091	0.168134	0.811361	228.645	202.887	273.736	194.145	272.858	256.528	PIGV
ENSG00000060656	0.104256	0.550102	0.959433	359.122	271.677	308.479	381.709	331.079	277.23	PTPRU
ENSG00000060688	0.217785	0.072501	0.659837	2231.78	1890.42	2023.54	1645.3	2075.98	1905.51	SNRNP40
ENSG00000060749	0.140058	0.419529	0.927876	1458.86	1620.48	1611.88	972.92	1571.1	1616.58	QSER1
ENSG00000060762	0.0815753	0.548869	0.959433	914.581	852.473	783.305	726.125	887.222	862.294	MPC1
ENSG00000060971	0.113403	0.412381	0.92399	787.832	670.485	879.113	834.715	770.78	749.782	ACAA1
ENSG00000060982	0.159796	0.36949	0.914544	2291.42	2243.08	1939.31	1341.47	2335.8	2290.75	BCAT1
ENSG00000061273	0.0263777	0.872803	0.988916	354.151	325.664	436.924	434.359	361.493	373.541	HDAC7
ENSG00000061337	0.0585686	0.79833	0.982669	238.586	225.527	306.373	284.088	166.843	173.719	LZTS1
ENSG00000061455	0.0704045	0.766023	0.97836	91.9551	86.2052	82.1207	94.3304	119.918	100.811	PRDM6
ENSG00000061656	-0.207152	0.289101	0.887832	243.557	269.065	261.102	410.228	309.355	264.629	SPAG4
ENSG00000061676	-0.208701	0.570863	0.96546	31.0659	55.7286	29.4792	30.7122	62.5661	56.7062	NCKAP1
ENSG00000061794	0.1383	0.253272	0.872547	1745.9	1434.14	1504.49	1422.63	1561.55	1513.06	MRPS35
ENSG00000061936	-0.283033	0.0449278	0.568528	1348.26	1677.95	1397.11	1835.06	1244.37	1342.05	SFSWAP
ENSG00000061938	-0.0437124	0.811236	0.984181	625.046	710.54	980.185	994.857	730.807	705.677	TNK2
ENSG00000061987	-0.0292366	0.849487	0.9875	997.837	1347.06	1213.91	926.851	1100.12	1104.42	MON2
ENSG00000062194	0.0666573	0.580404	0.966005	2285.21	2189.09	2118.29	1904.16	2236.74	2244.84	GPBP1
ENSG00000062282	0.125533	0.372036	0.914544	1257.55	1036.2	1407.63	1406.18	1378.19	1267.34	DGAT2
ENSG00000062485	-0.163121	0.15487	0.799933	3862.12	4225.8	3474.34	4003.56	3438.53	3832.62	CS
ENSG00000062524	-0.451398	0.0605893	0.628367	111.837	125.389	147.396	236.923	117.311	154.817	LTK
ENSG00000062582	0.164687	0.386541	0.918085	309.417	242.942	343.223	331.253	247.657	229.525	MRPS24
ENSG00000062598	0.0863433	0.50997	0.950794	825.111	726.213	811.732	757.934	855.07	863.194	ELMO2
ENSG00000062650	-0.122181	0.290597	0.887832	2897.83	3317.59	2781.58	2848.56	2790.27	3049.53	WAPL
ENSG00000062716	-0.0260345	0.849034	0.9875	1903.72	1906.09	1515.02	1548.77	1772.71	1828.1	VMP1
ENSG00000062725	-0.0369429	0.808208	0.984032	717.001	813.289	726.453	620.826	806.407	873.095	APPBP2
ENSG00000062822	-0.00744684	0.96285	0.998855	2358.52	2364.98	3020.57	3199.56	2344.49	2201.64	POLD1
ENSG00000063046	-0.129854	0.315883	0.897784	10594.7	11921.6	8632.15	9605.25	9928.02	10370.9	EIF4B
ENSG00000063127	-0.242227	0.670604	NA	14.9116	9.57835	7.36981	13.1624	13.0346	18.9021	SLC6A16
ENSG00000063169	-0.0596925	0.730763	0.976633	283.321	309.99	340.064	344.416	258.085	264.629	BICRA
ENSG00000063176	0.253527	0.0908621	0.698824	575.341	444.958	575.898	465.071	451.866	432.947	SPHK2
ENSG00000063177	0.00149883	0.991087	0.998903	14525.2	13329.6	11190.5	13526.5	12347.2	11165.7	RPL18
ENSG00000063180	0.188576	0.458155	0.939178	82.014	62.6947	71.5924	68.0057	68.6489	63.907	CA11
ENSG00000063241	0.0474304	0.755189	0.978248	913.338	851.603	874.902	911.495	734.283	676.874	ISOC2
ENSG00000063244	0.0313275	0.824421	0.986071	7399.9	7133.26	8212.07	7828.33	6048.06	6232.28	U2AF2
ENSG00000063245	-0.0304414	0.825229	0.986218	4924.57	4443.49	4775.64	5678.47	4311.85	4189.96	EPN1
ENSG00000063322	0.00695222	0.954083	0.99736	1662.65	1607.42	1568.72	1740.73	1621.5	1482.46	MED29
ENSG00000063438	-0.262946	0.10823	0.736214	5394.29	6319.1	6635.99	9258.64	5855.14	5887.54	AHRR
ENSG00000063587	-0.040129	0.772642	0.979994	654.87	715.764	764.354	701.994	609.15	666.973	ZNF275
ENSG00000063601	0.0233186	0.872894	0.988916	448.592	461.502	473.773	516.624	494.446	418.546	MTMR1
ENSG00000063660	0.0759397	0.663998	0.96914	364.093	303.895	434.819	463.974	430.142	401.444	GPC1
ENSG00000063761	0.207808	0.347776	0.907505	156.572	175.893	180.034	112.977	137.298	119.713	ADCK1
ENSG00000063854	-0.0569066	0.712296	0.975149	437.408	446.7	468.509	571.467	489.232	436.547	HAGH
ENSG00000063978	-0.137226	0.258166	0.874221	3206	3404.67	2941.61	3525.33	2854.58	2969.42	RNF4
ENSG00000064012	0.0618543	0.6583	0.96914	883.515	860.31	867.532	784.259	1005.4	996.408	CASP8
ENSG00000064102	0.309522	0.0954938	0.709061	976.713	806.323	870.69	510.042	961.954	947.803	INTS13
ENSG00000064115	0.358923	0.00444591	0.255067	1432.76	1157.24	1497.12	1002.54	1381.67	1199.83	TM7SF3
ENSG00000064195	-0.490136	0.0701738	0.655325	73.3156	124.519	97.9132	185.37	170.319	174.619	DLX3
ENSG00000064199	-0.114334	0.542661	0.958255	185.153	186.343	177.928	213.889	229.409	243.026	SPA17
ENSG00000064201	0.25264	0.236061	0.861347	249.77	241.2	441.136	346.609	301.534	247.527	TSPAN32
ENSG00000064225	0.213638	0.287646	0.887832	543.032	514.619	391.653	288.476	526.598	454.549	ST3GAL6
ENSG00000064300	-0.181176	0.632661	0.967532	43.4923	47.021	29.4792	47.1652	29.5451	21.6024	NGFR
ENSG00000064309	-0.0327643	0.833243	0.987024	375.276	416.223	347.434	341.125	347.589	335.737	CDON
ENSG00000064313	0.0148864	0.920364	0.994292	1854.01	1991.43	1745.59	1364.5	1683.2	1868.6	TAF2
ENSG00000064393	0.251258	0.194555	0.836349	2713.92	2797.75	2592.07	1695.75	1939.55	1590.47	HIPK2
ENSG00000064419	-0.0338218	0.756501	0.978248	2585.93	2721.99	2745.78	2744.36	2664.27	2720.1	TNPO3
ENSG00000064489	0.0515366	0.888186	0.991944	32.3086	33.0889	26.3207	26.3248	33.89	29.7032	BORCS8-MEF2B
ENSG00000064490	0.157418	0.207348	0.844382	1303.53	1059.71	1274.98	1262.49	1255.67	1117.02	RFXANK
ENSG00000064545	0.310517	0.037585	0.543967	652.384	494.591	776.988	623.02	629.137	543.659	TMEM161A
ENSG00000064547	-0.329639	0.0145124	0.387335	767.95	924.746	860.162	1114.42	756.007	958.604	LPAR2
ENSG00000064601	-0.133838	0.335224	0.905245	2338.64	2443.35	2742.62	3298.27	2736.4	2840.71	CTSA
ENSG00000064607	-0.266582	0.0679736	0.650509	3603.65	4333.77	4510.32	5585.24	3613.19	4190.86	SUGP2
ENSG00000064651	-0.11631	0.528709	0.956004	347.938	452.795	357.962	335.641	482.28	500.454	SLC12A2
ENSG00000064652	0.269879	0.143713	0.788248	182.668	164.574	203.196	148.077	215.505	186.32	SNX24
ENSG00000064666	-0.11744	0.324554	0.900759	6910.3	7541.65	6272.76	7906.21	7584.4	7083.77	CNN2
ENSG00000064687	0.0809255	0.645056	0.967532	479.658	473.693	651.702	643.86	516.17	442.848	ABCA7
ENSG00000064703	-0.0898306	0.517391	0.95179	1378.08	1463.75	1098.1	1175.84	1248.71	1321.34	DDX20
ENSG00000064726	0.119965	0.364986	0.913271	1808.04	1677.08	1542.4	1341.47	1624.98	1556.27	BTBD1
ENSG00000064763	-0.246311	0.0563201	0.611996	808.957	1002.24	767.513	881.88	749.924	873.095	FAR2
ENSG00000064932	0.011091	0.939244	0.997043	3150.08	3034.6	3642.79	3698.63	2783.32	2770.5	SBNO2
ENSG00000064933	0.406517	0.0427222	0.563428	239.829	202.016	287.423	151.367	285.892	259.228	PMS1
ENSG00000064961	0.0110307	0.936826	0.996347	2937.59	2695.87	3127.96	3538.49	2838.94	2604.88	HMG20B
ENSG00000064995	0.0295242	0.79847	0.982669	1660.16	1535.15	1533.97	1603.62	1558.07	1516.67	TAF11
ENSG00000064999	0.315131	0.012849	0.37491	1100.98	970.026	1278.14	993.76	1173.11	892.897	ANKS1A
ENSG00000065000	0.0516589	0.668939	0.969372	7132.74	6797.15	7281.37	7232.73	6380	6032.46	AP3D1
ENSG00000065029	0.0526922	0.711712	0.975149	1124.59	1081.48	1419.21	1345.85	1162.69	1148.52	ZNF76
ENSG00000065054	0.125147	0.482557	0.94489	270.895	217.69	294.792	251.182	212.899	243.927	SLC9A3R2
ENSG00000065057	0.375054	0.0916667	0.700512	168.999	131.485	285.317	188.661	193.781	180.92	NTHL1
ENSG00000065060	0.143577	0.237454	0.861657	1758.33	1754.58	2064.6	1667.24	1981.26	1833.5	UHRF1BP1
ENSG00000065135	-0.101738	0.454879	0.939178	3777.62	4146.56	2985.83	3349.83	3733.98	3766.01	GNAI3
ENSG00000065150	0.071543	0.563429	0.964571	2790.96	2735.93	2512.05	2235.41	2583.46	2530.18	IPO5
ENSG00000065154	0.100252	0.433324	0.933592	1005.29	923.005	1006.51	1006.92	1152.26	1024.31	OAT
ENSG00000065183	0.37791	0.00689009	0.304171	2707.71	2303.16	2778.42	1670.53	2480.05	2153.03	WDR3
ENSG00000065243	-0.0166069	0.908887	0.99377	693.391	764.527	773.83	657.022	799.456	871.295	PKN2
ENSG00000065268	0.145481	0.354671	0.909137	917.066	860.31	1126.53	1056.28	898.519	745.281	WDR18
ENSG00000065308	0.100919	0.4649	0.939682	1000.32	1095.42	1348.68	1082.61	1199.18	1132.32	TRAM2
ENSG00000065320	-0.394807	0.0711176	0.657123	125.506	159.349	117.917	217.179	141.643	132.314	NTN1
ENSG00000065328	-0.0460131	0.696584	0.97173	1109.67	1144.18	1153.9	1136.35	1104.47	1196.23	MCM10
ENSG00000065357	-0.124156	0.537091	0.957544	144.146	145.417	131.604	188.661	163.367	146.716	DGKA
ENSG00000065413	0.104727	0.734585	0.976633	43.4923	59.2116	74.7509	40.584	49.5315	55.8061	ANKRD44
ENSG00000065427	0.127662	0.26229	0.879332	3695.6	3401.19	3396.43	3058.06	3396.82	3138.64	KARS
ENSG00000065457	0.101299	0.487746	0.94489	516.937	523.326	605.377	460.683	549.191	573.362	ADAT1
ENSG00000065485	-0.10101	0.482935	0.94489	420.011	458.89	481.143	535.27	477.935	487.853	PDIA5
ENSG00000065491	0.0560542	0.682063	0.97039	616.348	578.184	607.483	549.53	527.467	554.46	TBC1D22B
ENSG00000065518	0.096637	0.404475	0.923068	2004.37	1718.01	1924.57	1944.74	1959.54	1845.2	NDUFB4
ENSG00000065526	0.0253982	0.862153	0.988656	4009.99	4251.05	4737.73	4451.08	3548.02	3378.97	SPEN
ENSG00000065534	0.369625	0.131542	0.769279	77.0435	74.0145	97.9132	81.168	112.967	69.3075	MYLK
ENSG00000065548	0.100381	0.51291	0.951049	3003.45	2802.97	2272.01	1995.2	2701.64	2639.09	ZC3H15
ENSG00000065559	-0.257227	0.112102	0.744989	300.718	390.1	273.736	324.672	344.114	383.442	MAP2K4
ENSG00000065600	0.214716	0.17071	0.814472	457.29	373.556	401.128	369.644	369.314	313.234	TMEM206
ENSG00000065609	-0.489701	0.200854	0.842372	21.1248	30.4766	21.0566	41.6809	39.9728	45.0049	SNAP91
ENSG00000065613	-0.0578855	0.665139	0.96914	1675.07	1814.66	1499.23	1464.32	1733.6	1828.1	SLK
ENSG00000065615	-0.107249	0.486597	0.94489	1057.48	1125.02	779.094	851.168	908.946	977.506	CYB5R4
ENSG00000065621	0.375807	0.555925	NA	17.3969	13.9321	9.47547	6.58119	8.68974	6.30069	GSTO2
ENSG00000065665	-0.420362	0.0886368	0.694971	69.5877	97.525	70.5396	121.752	83.4215	81.9089	SEC61A2
ENSG00000065675	0.0641033	0.712765	0.975149	205.035	178.506	208.46	197.436	202.471	213.323	PRKCQ
ENSG00000065717	0.303776	0.550497	NA	31.0659	30.4766	15.7924	6.58119	23.4623	18.9021	TLE2
ENSG00000065802	-0.158355	0.248935	0.870344	895.941	1064.94	1006.51	1119.9	862.022	900.998	ASB1
ENSG00000065809	-0.4408	0.00230978	0.191501	7300.49	9121.2	5187.29	9046.95	6399.12	7466.31	FAM107B
ENSG00000065833	-0.02094	0.910972	0.99377	868.603	912.556	838.053	733.803	1154	1256.54	ME1
ENSG00000065882	-0.149898	0.219874	0.853882	4023.66	4149.17	3300.62	4047.43	3461.99	3767.81	TBC1D1
ENSG00000065883	-0.125326	0.269334	0.880876	2315.03	2578.32	2449.94	2589.7	2211.54	2441.07	CDK13
ENSG00000065911	0.187743	0.287646	0.887832	7882.05	6673.5	5003.05	4353.46	6032.41	5577.91	MTHFD2
ENSG00000065923	-0.177802	0.407909	0.923518	180.182	158.478	153.713	257.763	175.533	162.018	SLC9A7
ENSG00000065970	-0.0959903	0.533768	0.956004	341.725	392.712	349.54	323.575	312.83	354.639	FOXJ2
ENSG00000065978	0.0866702	0.457944	0.939178	158797	137621	130505	133142	136581	130285	YBX1
ENSG00000065989	-0.221599	0.143796	0.788386	673.509	705.315	628.539	799.615	525.729	624.668	PDE4A
ENSG00000066027	0.130212	0.265188	0.880394	1522.23	1344.45	1479.23	1300.88	1397.31	1371.75	PPP2R5A
ENSG00000066032	0.19905	0.662755	0.96914	19.8822	13.0614	23.1623	23.0342	40.8418	37.8041	CTNNA2
ENSG00000066044	0.0822024	0.495559	0.946129	2681.61	2445.96	2911.07	2824.43	2590.41	2460.87	ELAVL1
ENSG00000066056	0.796027	0.52255	0.953868	108.109	39.1842	5.26415	5.48433	52.1384	50.4055	TIE1
ENSG00000066084	0.0871315	0.597166	0.966212	446.107	514.619	511.675	377.322	413.631	396.943	DIP2B
ENSG00000066117	-0.0966725	0.447932	0.936213	835.052	868.147	868.585	981.695	825.525	855.993	SMARCD1
ENSG00000066135	0.0540082	0.637408	0.967532	8267.26	8388.9	8482.65	7234.92	7675.64	7901.06	KDM4A
ENSG00000066136	-0.0663943	0.522849	0.953868	26905.6	27987.1	25436.4	26761.3	25752	27021.8	NFYC
ENSG00000066185	0.328237	0.353227	0.908834	43.4923	26.1228	30.5321	29.6154	39.1038	34.2037	ZMYND12
ENSG00000066230	-0.550332	0.0231809	0.460235	123.021	217.69	214.777	306.025	136.429	172.819	SLC9A3
ENSG00000066248	-0.404464	0.0361006	0.5376	195.094	224.656	190.562	340.028	240.706	268.229	NGEF
ENSG00000066279	-0.234835	0.167685	0.811164	910.853	1268.7	1378.15	1225.2	1250.45	1673.28	ASPM
ENSG00000066294	0.080664	0.566398	0.965198	465.989	421.448	454.823	447.521	499.66	475.252	CD84
ENSG00000066322	0.135782	0.225962	0.856296	5672.64	5037.34	4967.25	4774.66	5440.64	4822.72	ELOVL1
ENSG00000066336	0.0321718	0.816078	0.985428	9071.25	7956.13	7450.88	8387.73	6995.24	6652.62	SPI1
ENSG00000066379	0.356606	0.0685139	0.650509	232.373	163.703	169.506	148.077	178.14	139.515	ZNRD1
ENSG00000066422	-0.0256689	0.855204	0.988096	995.352	1083.22	1005.45	861.039	1049.72	1159.33	ZBTB11
ENSG00000066427	-0.229077	0.193097	0.834262	408.828	512.007	337.958	367.45	453.604	526.557	ATXN3
ENSG00000066455	-0.197324	0.15745	0.799933	915.823	946.515	710.66	975.113	917.636	995.508	GOLGA5
ENSG00000066557	0.0973288	0.53095	0.956004	590.252	540.742	510.622	439.843	595.247	603.066	LRRC40
ENSG00000066583	0.225126	0.165645	0.811164	296.99	271.677	312.69	224.857	301.534	281.731	ISOC1
ENSG00000066629	-0.0874143	0.641599	0.967532	171.484	184.601	145.291	171.111	192.043	185.42	EML1
ENSG00000066651	0.105431	0.556351	0.961473	485.871	446.7	357.962	303.832	424.059	424.846	TRMT11
ENSG00000066654	-0.117553	0.353408	0.908834	1265	1388.86	1138.11	1172.55	1154	1294.34	THUMPD1
ENSG00000066697	-0.00619003	0.966079	0.998855	355.394	360.494	357.962	378.419	391.907	372.641	MSANTD3
ENSG00000066735	-0.315815	0.224968	0.853962	155.33	151.512	84.2264	177.692	106.015	99.9109	KIF26A
ENSG00000066739	0.15674	0.361698	0.912022	506.996	578.184	582.215	365.256	538.764	514.856	ATG2B
ENSG00000066777	-0.0565887	0.692608	0.971196	2720.13	3207.88	2528.9	2212.38	2675.57	2818.21	ARFGEF1
ENSG00000066827	-0.0433937	0.782267	0.981637	565.4	632.171	528.521	560.498	499.66	448.249	ZFAT
ENSG00000066855	0.223912	0.164367	0.807935	632.502	532.034	548.524	417.906	641.302	608.466	MTFR1
ENSG00000066923	-0.385256	0.176285	0.821293	54.676	67.0485	38.9547	66.9088	53.0074	57.6063	STAG3
ENSG00000066926	-0.0414833	0.764728	0.97836	637.473	748.853	770.671	686.638	759.483	796.587	FECH
ENSG00000066933	0.0559326	0.752422	0.978248	294.505	385.746	353.751	286.282	328.472	267.329	MYO9A
ENSG00000067048	-0.134597	0.299547	0.890986	4012.47	4356.41	3229.03	3846.71	3528.03	3616.59	DDX3Y
ENSG00000067057	-0.106586	0.436342	0.934958	3880.75	3884.46	3887.05	5171.72	4453.49	4107.15	PFKP
ENSG00000067064	-0.346696	0.00942711	0.335579	801.501	944.774	676.97	1033.25	817.704	943.303	IDI1
ENSG00000067066	-0.328044	0.0182565	0.431711	1466.31	1878.23	1160.22	1520.26	1415.56	1673.28	SP100
ENSG00000067082	-0.40015	0.0144128	0.387335	658.598	955.223	513.781	779.871	649.123	667.873	KLF6
ENSG00000067113	0.342505	0.256713	0.87313	44.7349	38.3134	56.8528	43.8746	64.304	49.5054	PLPP1
ENSG00000067141	0.0945742	0.585597	0.966005	193.851	201.145	235.834	195.242	221.588	214.223	NEO1
ENSG00000067167	0.00234407	0.985578	0.998855	3449.56	3439.5	2922.66	2855.14	3416.8	3476.18	TRAM1
ENSG00000067177	0.0383742	0.854772	0.988043	126.749	106.233	134.762	151.367	139.036	134.115	PHKA1
ENSG00000067182	-0.0508834	0.688737	0.971196	2578.47	2550.45	2731.04	3051.48	2461.8	2450.07	TNFRSF1A
ENSG00000067191	-0.294105	0.341645	0.907505	53.4334	59.2116	113.706	127.236	81.6835	120.613	CACNB1
ENSG00000067208	-0.115424	0.456326	0.939178	371.548	437.992	405.339	350.997	358.886	439.248	EVI5
ENSG00000067221	0.377126	0.0897729	0.697459	126.749	98.3958	181.087	108.59	140.774	138.615	STOML1
ENSG00000067225	0.00393005	0.972755	0.998855	21604.5	20393.2	18127.6	20214.1	19900.4	18861.6	PKM
ENSG00000067248	0.0160004	0.897925	0.99267	1516.02	1533.41	1447.64	1319.53	1530.26	1589.57	DHX29
ENSG00000067334	0.0476569	0.740383	0.976633	4109.4	3631.07	2893.18	3051.48	3447.22	3423.97	DNTTIP2
ENSG00000067365	-0.13406	0.387967	0.919502	321.843	372.685	346.381	420.099	355.41	333.036	METTL22
ENSG00000067369	0.0903634	0.488888	0.94489	928.25	962.189	1156.01	997.051	1038.42	975.706	TP53BP1
ENSG00000067445	-0.103862	0.66348	0.96914	94.4404	100.137	147.396	150.271	137.298	159.317	TRO
ENSG00000067533	0.0776845	0.665491	0.96914	1226.48	1135.47	867.532	714.059	934.147	1015.31	RRP15
ENSG00000067560	-0.142084	0.284814	0.887832	21034.1	22858.3	16278.9	19444.1	20850.2	21878.7	RHOA
ENSG00000067596	-0.118348	0.301547	0.890986	2295.15	2502.56	2184.62	2447.11	2152.45	2248.44	DHX8
ENSG00000067601	-0.0721351	0.846909	0.987024	24.8527	38.3134	26.3207	28.5185	40.8418	30.6033	PMS2P4
ENSG00000067606	0.209117	0.223585	0.853882	243.557	180.247	220.041	202.92	218.112	206.122	PRKCZ
ENSG00000067646	-0.204607	0.192781	0.834262	539.304	753.207	537.996	516.624	560.488	615.667	ZFY
ENSG00000067704	-0.0689363	0.538604	0.957544	3680.69	4055.13	3582.78	3571.39	3708.78	3881.22	IARS2
ENSG00000067798	0.587433	0.000308955	0.0646902	1205.36	984.829	1412.9	648.247	1114.02	847.892	NAV3
ENSG00000067829	-0.0462118	0.71866	0.975854	1325.89	1326.17	1233.92	1487.35	1331.27	1206.13	IDH3G
ENSG00000067836	0.182394	0.172491	0.815413	1291.1	1036.2	1201.28	1191.2	1121.84	957.704	ROGDI
ENSG00000067840	0.311545	0.19315	0.834262	91.9551	74.8853	106.336	81.168	82.5525	70.2076	PDZD4
ENSG00000067842	0.117978	0.632719	0.967532	125.506	103.62	84.2264	111.88	103.408	72.9079	ATP2B3
ENSG00000067900	0.0429354	0.772673	0.979994	3356.36	3498.71	2897.39	2435.04	3336.86	3372.67	ROCK1
ENSG00000067955	-0.20031	0.0863432	0.68972	3332.75	3813.93	3014.25	3672.31	3568.01	3906.43	CBFB
ENSG00000067992	-0.0254491	0.910239	0.99377	119.293	102.75	141.079	171.111	154.677	151.216	PDK3
ENSG00000068001	0.295124	0.145566	0.793608	260.954	235.976	344.275	284.088	246.788	175.519	HYAL2
ENSG00000068024	0.163139	0.376452	0.914819	853.691	815.902	1189.7	1108.93	868.105	677.774	HDAC4
ENSG00000068028	0.0824973	0.585621	0.966005	929.492	886.433	1102.31	1074.93	882.008	792.086	RASSF1
ENSG00000068078	-0.270878	0.233427	0.861347	170.241	182.859	254.785	353.191	235.492	264.629	FGFR3
ENSG00000068079	0.00148345	0.990888	0.998903	883.515	782.813	868.585	943.304	859.415	883.896	IFI35
ENSG00000068097	-0.046279	0.743653	0.976633	509.481	551.191	526.415	467.265	500.529	566.162	HEATR6
ENSG00000068120	0.152261	0.22219	0.853882	2003.13	1812.92	2386.77	1993	2007.33	1951.41	COASY
ENSG00000068137	-0.385359	0.0375254	0.543959	546.76	678.322	546.419	932.336	530.943	513.056	PLEKHH3
ENSG00000068305	-0.176012	0.183733	0.82872	888.485	993.536	760.143	866.524	865.498	978.406	MEF2A
ENSG00000068308	-0.20806	0.0921031	0.701638	1263.76	1347.94	1196.01	1549.87	1204.4	1335.75	OTUD5
ENSG00000068323	0.0873284	0.478894	0.942859	1624.13	1540.37	1777.18	1456.64	1512.88	1626.48	TFE3
ENSG00000068354	-0.0224559	0.889748	0.991944	257.226	236.847	235.834	266.538	249.395	251.127	TBC1D25
ENSG00000068366	-0.0293487	0.835863	0.987024	1923.6	2182.99	1684.53	1577.29	1914.35	1873.1	ACSL4
ENSG00000068383	-0.315088	0.021718	0.451088	1023.93	1156.37	853.845	1306.37	943.705	1047.71	INPP5A
ENSG00000068394	-0.140434	0.30652	0.893026	567.885	619.11	551.683	685.541	576.998	567.062	GPKOW
ENSG00000068400	-0.0350998	0.762014	0.97836	2097.57	2129.01	2301.49	2320.97	2079.45	2189.04	GRIPAP1
ENSG00000068438	0.0952486	0.449753	0.936674	787.832	761.914	766.46	729.416	779.469	693.075	FTSJ1
ENSG00000068489	-0.0928312	0.507536	0.949967	1406.66	1436.75	1583.46	1669.43	1700.58	1899.21	PRR11
ENSG00000068615	0.28334	0.478893	0.942859	28.5806	19.1567	36.849	23.0342	42.5797	46.8051	REEP1
ENSG00000068650	0.181458	0.184503	0.829489	1721.05	1836.43	1940.37	1559.74	1756.2	1380.75	ATP11A
ENSG00000237973	0.876482	0.000159962	0.0445664	572.856	247.296	301.109	198.533	563.095	335.737	MTCO1P12
ENSG00000068697	0.115742	0.380158	0.917274	1212.81	1102.38	1017.03	937.82	1121.84	1050.41	LAPTM4A
ENSG00000068724	0.00465728	0.971518	0.998855	4139.22	3826.99	4432.41	4884.34	4032.04	3854.22	TTC7A
ENSG00000068745	-0.152511	0.261268	0.877801	1067.43	1215.58	1131.79	1367.79	1061.89	1043.21	IP6K2
ENSG00000068784	0.119972	0.470561	0.940448	306.931	309.12	355.856	278.604	375.397	368.14	SRBD1
ENSG00000068796	-0.03557	0.808024	0.984032	965.529	1134.6	1029.67	858.846	1096.64	1174.63	KIF2A
ENSG00000068831	-0.161547	0.273057	0.880876	2189.53	2311.87	2468.89	3119.49	2169.83	2208.84	RASGRP2
ENSG00000068878	-0.0697796	0.623726	0.967245	1576.91	1808.57	1412.9	1308.56	1567.63	1663.38	PSME4
ENSG00000068885	0.0389832	0.845847	0.987024	154.087	163.703	194.774	148.077	189.436	212.423	IFT80
ENSG00000068903	0.0326398	0.815744	0.985361	1350.75	1160.72	1114.95	1243.85	1056.67	1036.91	SIRT2
ENSG00000068912	-0.0417337	0.743919	0.976633	1023.93	984.829	932.807	976.21	1034.95	1117.92	ERLEC1
ENSG00000068971	0.159519	0.34222	0.907505	306.931	289.092	307.426	244.601	254.609	242.126	PPP2R5B
ENSG00000068976	-0.629022	0.248741	NA	9.94109	11.3199	11.5811	17.5498	10.4277	20.7023	PYGM
ENSG00000069011	0.692579	0.000486859	0.080097	233.616	148.9	348.487	207.308	318.913	203.422	PITX1
ENSG00000069020	0.313337	0.18336	0.82872	84.4993	97.525	121.075	86.6524	122.525	81.0088	MAST4
ENSG00000069188	0.856184	0.619022	NA	34.7938	8.70759	1.05283	0	9.55871	16.2018	SDK2
ENSG00000069248	-0.0969732	0.412583	0.92399	1954.67	2156	1906.67	1891	1972.57	2190.84	NUP133
ENSG00000069275	-0.247953	0.023876	0.465104	10998.6	12981.3	11923.3	14136.4	11949.3	14295.4	NUCKS1
ENSG00000069329	0.0666488	0.627718	0.967532	2389.59	2346.7	2122.51	1799.96	2327.11	2380.76	VPS35
ENSG00000069345	0.0314519	0.823173	0.98599	2720.13	2567.87	2154.09	1997.39	2348.84	2497.77	DNAJA2
ENSG00000069399	-0.445784	0.0068678	0.304171	415.041	499.816	285.317	508.946	405.811	497.754	BCL3
ENSG00000069424	-0.110938	0.475793	0.941227	17144.7	17516.2	15482.9	18236.5	12470.6	12947.9	KCNAB2
ENSG00000069482	0.00928714	0.963261	0.998855	237.344	196.792	303.215	342.222	280.678	279.93	GAL
ENSG00000069493	-0.193317	0.670564	NA	12.4264	16.5444	26.3207	25.2279	19.9864	26.1028	CLEC2D
ENSG00000069667	-0.0159029	0.975036	NA	9.94109	14.8029	16.8453	13.1624	21.7243	21.6024	RORA
ENSG00000069696	0.061801	0.921386	NA	13.669	6.96607	10.5283	17.5498	8.68974	7.20078	DRD4
ENSG00000069702	-0.0598681	0.734863	0.976633	173.969	181.118	177.928	179.886	183.353	197.121	TGFBR3
ENSG00000069849	0.0670214	0.582065	0.966005	1950.94	1832.08	1681.37	1651.88	1770.97	1671.48	ATP1B3
ENSG00000069869	-0.0677862	0.677814	0.969428	525.635	603.436	467.456	469.458	625.661	623.768	NEDD4
ENSG00000069943	0.0325612	0.828455	0.987024	379.004	398.808	421.132	422.293	480.542	433.847	PIGB
ENSG00000069956	-0.157661	0.194402	0.836349	3106.59	3657.19	2806.84	3137.04	3272.55	3451.88	MAPK6
ENSG00000069966	0.0103991	0.940144	0.997043	927.007	870.759	748.562	800.712	775.993	759.683	GNB5
ENSG00000069974	0.0235243	0.852769	0.98785	4431.24	4230.15	3601.73	3584.56	4041.6	4061.24	RAB27A
ENSG00000069998	0.157988	0.24343	0.866017	1201.63	969.155	1223.39	1169.26	1047.11	973.906	HDHD5
ENSG00000070010	0.0733335	0.521977	0.953547	1498.62	1393.21	1460.28	1430.31	1447.71	1364.55	UFD1
ENSG00000070018	0.321049	0.0773068	0.668059	246.042	215.948	246.362	157.949	218.112	192.621	LRP6
ENSG00000070047	-0.0445445	0.747987	0.976753	3099.14	3052.88	3463.81	3679.98	2740.74	2863.21	PHRF1
ENSG00000070061	0.0184629	0.873449	0.988916	1557.02	1566.5	1478.17	1503.8	1532.87	1439.26	ELP1
ENSG00000070081	-0.161246	0.191571	0.833642	3346.42	3437.76	3209.03	4139.57	3700.96	3895.62	NUCB2
ENSG00000070087	-0.235409	0.670807	NA	7.45582	6.96607	25.2679	30.7122	23.4623	29.7032	PFN2
ENSG00000070159	0.227038	0.211448	0.84778	196.337	161.09	217.936	208.404	229.409	182.72	PTPN3
ENSG00000070182	0.247548	0.348274	0.907505	91.9551	76.6268	69.4868	53.7464	72.1248	64.8071	SPTB
ENSG00000070190	0.0801625	0.62243	0.966504	545.518	515.49	506.411	378.419	463.163	535.558	DAPP1
ENSG00000070214	-0.100753	0.374257	0.914554	5385.59	5869.79	4810.38	5360.38	5391.11	5483.4	SLC44A1
ENSG00000070269	0.176652	0.269502	0.880876	379.004	376.168	447.453	344.416	482.28	438.348	TMEM260
ENSG00000070366	0.0364593	0.82262	0.985969	251.013	225.527	233.728	235.826	238.968	243.927	SMG6
ENSG00000070367	0.00538762	0.970259	0.998855	2075.2	2196.93	1862.46	1635.43	2169.83	2250.24	EXOC5
ENSG00000070371	0.163762	0.326063	0.901586	902.154	896.011	1378.15	1196.68	1193.97	1012.61	CLTCL1
ENSG00000070404	0.0417771	0.861237	0.988434	77.0435	104.491	126.34	88.8461	101.67	103.511	FSTL3
ENSG00000070413	0.165946	0.207842	0.844382	2993.51	2742.89	3303.78	2792.62	2592.15	2387.06	DGCR2
ENSG00000070423	-0.0732222	0.63382	0.967532	2288.94	2192.57	2283.59	2857.33	2013.41	1880.3	RNF126
ENSG00000070444	-0.0519422	0.752613	0.978248	345.453	407.515	465.351	446.424	362.362	363.64	MNT
ENSG00000070476	0.0365051	0.781306	0.981596	940.676	1010.08	1136	1072.73	1020.17	938.802	ZXDC
ENSG00000070495	-0.0139004	0.910475	0.99377	1330.86	1259.12	1162.32	1216.42	1148.78	1198.93	JMJD6
ENSG00000070501	0.189576	0.187605	0.830302	478.415	375.297	424.29	392.678	456.211	423.046	POLB
ENSG00000070540	-0.185114	0.584376	0.966005	54.676	39.1842	33.6906	59.2307	69.5179	81.9089	WIPI1
ENSG00000070610	-0.0659135	0.583681	0.966005	1811.76	1982.72	1902.46	1810.92	1651.05	1820	GBA2
ENSG00000070614	-0.201697	0.126106	0.764374	826.353	1017.92	795.939	999.244	871.58	852.393	NDST1
ENSG00000070669	0.137728	0.367269	0.914544	1959.64	1623.1	1457.12	1360.11	1883.93	1832.6	ASNS
ENSG00000070718	0.157738	0.334128	0.905245	337.997	350.045	430.607	313.704	417.976	400.544	AP3M2
ENSG00000070731	-0.23494	0.244989	0.868157	116.808	134.097	111.6	150.271	137.298	147.616	ST6GALNAC2
ENSG00000070756	-0.0798555	0.612222	0.966212	51324.6	52333.5	35534.1	37187	41669	46317.2	PABPC1
ENSG00000070759	-0.0352848	0.868701	0.988729	106.867	101.879	107.389	112.977	100.801	108.012	TESK2
ENSG00000070761	0.134895	0.297624	0.890986	832.567	822.868	880.166	793.034	835.084	704.777	CFAP20
ENSG00000070770	-0.167812	0.251931	0.872547	2183.31	2391.11	1595.04	1886.61	1980.39	2188.14	CSNK2A2
ENSG00000070778	-0.0822135	0.688397	0.971196	142.903	153.254	116.864	131.624	126.87	123.313	PTPN21
ENSG00000070785	0.475012	0.00033218	0.0680305	746.825	534.646	684.339	499.074	691.703	492.354	EIF2B3
ENSG00000070814	0.252568	0.085218	0.688552	1591.82	1304.4	1902.46	1579.49	1428.59	1249.34	TCOF1
ENSG00000070831	-0.114611	0.373666	0.914554	7923.05	8327.94	6221.17	7029.81	7085.61	7623.83	CDC42
ENSG00000070882	0.322038	0.0556543	0.610267	272.137	236.847	286.37	205.114	318.044	259.228	OSBPL3
ENSG00000070950	-0.107468	0.472387	0.940448	533.091	590.375	447.453	466.168	498.791	534.658	RAD18
ENSG00000070961	-0.000920876	0.995784	0.999429	743.097	768.881	585.373	488.105	642.171	711.077	ATP2B1
ENSG00000071051	-0.0383263	0.784582	0.981751	3924.25	3597.11	3859.67	4906.28	3978.16	3578.79	NCK2
ENSG00000071054	-0.0647428	0.563906	0.964713	2603.32	2741.15	2691.03	2913.27	2863.27	2880.31	MAP4K4
ENSG00000071073	-0.111543	0.583068	0.966005	1814.25	2033.22	1131.79	1107.83	1306.07	1448.26	MGAT4A
ENSG00000071082	0.0287516	0.834648	0.987024	14988.7	13394	13634.1	14581.7	11526.1	11379	RPL31
ENSG00000071127	0.0131555	0.908046	0.99377	15663.4	15277.5	14953.3	15976.9	14612.7	13564.5	WDR1
ENSG00000071189	-0.0577557	0.662766	0.96914	872.331	963.06	854.898	801.809	904.601	973.006	SNX13
ENSG00000071205	0.372475	0.102747	0.722897	170.241	114.069	105.283	123.946	158.153	97.2106	ARHGAP10
ENSG00000071242	0.151993	0.345758	0.907505	654.87	603.436	517.992	438.746	543.108	498.654	RPS6KA2
ENSG00000071243	-0.367153	0.00727894	0.310256	511.966	645.233	446.4	640.569	526.598	630.069	ING3
ENSG00000071246	0.234077	0.554468	0.961008	5154.46	4080.38	2519.42	2494.27	2972.76	2476.17	VASH1
ENSG00000071462	-0.0731381	0.547385	0.959433	1898.75	1862.55	1776.12	2079.66	1747.51	1762.39	BUD23
ENSG00000071537	-0.199972	0.168984	0.811361	2439.3	3237.48	2193.04	2249.67	2321.03	2496.87	SEL1L
ENSG00000071539	0.0570145	0.670377	0.969372	1564.48	1504.67	1768.75	1724.27	1934.34	1838	TRIP13
ENSG00000071553	0.0320796	0.787955	0.982576	2887.89	2659.3	2920.55	3187.49	3002.3	2773.2	ATP6AP1
ENSG00000071564	0.147958	0.292791	0.888137	3793.77	3254.9	4201.84	4028.79	3407.25	3009.03	TCF3
ENSG00000071575	0.0547209	0.801991	0.983438	103.139	104.491	97.9132	94.3304	115.573	106.212	TRIB2
ENSG00000071626	-0.157888	0.301947	0.890986	3793.77	4029	4800.9	5799.13	4090.26	4327.67	DAZAP1
ENSG00000071655	0.156659	0.276399	0.882205	3532.82	2960.58	3833.35	3580.17	2947.56	2712	MBD3
ENSG00000071794	0.328019	0.0312658	0.514208	908.368	744.499	970.709	698.703	1122.71	948.703	HLTF
ENSG00000071859	0.143881	0.239157	0.86258	1523.47	1304.4	1445.54	1325.01	1308.67	1240.33	FAM50A
ENSG00000071889	0.203119	0.163202	0.806273	530.606	469.339	640.121	559.401	567.44	483.353	FAM3A
ENSG00000071894	0.00300208	0.983138	0.998855	5657.73	5822.77	7169.77	7012.26	5536.23	5492.4	CPSF1
ENSG00000071909	0.0100719	0.985291	NA	16.1543	12.1906	11.5811	9.87179	12.1656	17.1019	MYO3B
ENSG00000071967	0.141231	0.491266	0.945459	160.3	158.478	174.77	154.658	232.885	203.422	CYBRD1
ENSG00000071994	0.190263	0.11871	0.758311	2255.39	1884.32	1876.14	1791.18	2169.83	1846.1	PDCD2
ENSG00000072042	0.0879784	0.495714	0.946129	780.376	701.832	705.396	684.444	779.469	744.381	RDH11
ENSG00000072062	0.130284	0.310631	0.894064	985.411	842.895	987.554	931.239	878.532	830.79	PRKACA
ENSG00000072071	0.0629848	0.68034	0.970201	1432.76	1316.59	1566.61	1584.97	1213.09	1131.42	ADGRL1
ENSG00000072110	-0.00187476	0.985862	0.998855	11754.1	11579.4	11141	11784.7	11396.6	10972.2	ACTN1
ENSG00000072121	0.0467893	0.767969	0.978698	344.21	362.236	450.611	412.421	375.397	360.039	ZFYVE26
ENSG00000072134	0.176994	0.412932	0.92399	166.513	164.574	148.449	121.752	133.822	108.912	EPN2
ENSG00000072135	0.0908661	0.459866	0.939682	1426.55	1320.07	1625.57	1490.64	1478.12	1444.66	PTPN18
ENSG00000072163	0.123388	0.718405	0.975854	44.7349	31.3473	29.4792	46.0683	50.4005	37.8041	LIMS2
ENSG00000072182	-0.306316	0.575798	NA	14.9116	17.4152	15.7924	12.0655	6.95179	16.2018	ASIC4
ENSG00000072201	-0.0962715	0.828179	NA	27.338	26.9935	11.5811	30.7122	33.021	19.8022	LNX1
ENSG00000072210	0.0227479	0.874774	0.988916	387.703	379.651	400.075	361.966	374.528	401.444	ALDH3A2
ENSG00000072274	0.215515	0.0893919	0.69729	5354.52	5134	5039.9	3968.46	5530.15	4610.3	TFRC
ENSG00000072310	-0.251771	0.110912	0.739973	1858.98	2078.5	2171.99	2977.99	1893.49	2000.92	SREBF1
ENSG00000072364	-0.326532	0.00976506	0.335579	1224	1746.74	1272.87	1442.38	1233.94	1487.86	AFF4
ENSG00000072401	0.12614	0.51016	0.950794	283.321	252.52	227.411	187.564	287.63	289.832	UBE2D1
ENSG00000072415	0.0112483	0.932995	0.995869	628.774	636.525	614.853	569.273	643.04	665.172	MPP5
ENSG00000072422	0.3936	0.0455289	0.569665	159.058	128.002	217.936	153.561	195.519	155.717	RHOBTB1
ENSG00000072501	-0.0252171	0.83539	0.987024	4544.32	5325.56	5296.79	4538.83	4974	5211.57	SMC1A
ENSG00000072506	0.206101	0.145061	0.792135	1155.65	890.787	1240.23	1182.42	1094.04	954.104	HSD17B10
ENSG00000072518	-0.0441243	0.712772	0.975149	2262.84	2225.66	2229.89	2426.27	2044.69	2088.23	MARK2
ENSG00000072571	0.0075049	0.966686	0.998855	909.61	837.671	1033.88	1054.09	1308.67	1346.55	HMMR
ENSG00000072609	-0.0821429	0.523229	0.954183	2037.92	2095.05	2326.75	2613.83	2188.94	2232.24	CHFR
ENSG00000072657	-0.0500135	0.775316	0.980102	965.529	1076.26	792.781	648.247	782.945	901.898	TRHDE
ENSG00000072682	0.0445334	0.782306	0.981637	304.446	256.003	277.947	295.057	310.224	315.034	P4HA2
ENSG00000072694	-0.167737	0.381376	0.917608	224.917	250.779	174.77	218.276	265.037	278.13	FCGR2B
ENSG00000072736	-0.0470661	0.708863	0.97508	965.529	1069.29	1025.46	1001.44	923.719	939.702	NFATC3
ENSG00000072756	0.183303	0.347825	0.907505	555.459	529.422	497.989	336.738	636.958	621.068	TRNT1
ENSG00000072778	-0.126943	0.305048	0.892206	5379.37	5575.47	6006.39	6615.2	5059.16	5767.83	ACADVL
ENSG00000072786	-0.271525	0.0298677	0.507894	5898.8	6827.62	5444.18	7592.5	5509.29	5922.64	STK10
ENSG00000072803	-0.068782	0.580943	0.966005	1516.02	1619.61	1362.36	1367.79	1408.61	1505.86	FBXW11
ENSG00000072818	-0.539203	0.154273	0.799933	32.3086	29.6058	31.5849	62.5213	23.4623	35.1038	ACAP1
ENSG00000072832	0.75775	0.170376	NA	19.8822	9.57835	13.6868	9.87179	14.7725	9.00098	CRMP1
ENSG00000072840	0.183092	0.521092	0.953226	47.2202	52.2456	78.9622	58.1339	62.5661	56.7062	EVC
ENSG00000072849	-0.0880959	0.571564	0.96546	303.203	288.221	265.313	303.832	275.465	304.233	DERL2
ENSG00000072858	0.645139	0.18541	NA	19.8822	14.8029	16.8453	16.453	26.9382	9.90108	SIDT1
ENSG00000072864	-0.149596	0.246044	0.869261	781.619	804.582	770.671	927.948	827.263	909.099	NDE1
ENSG00000072952	-0.455348	0.322459	NA	19.8822	26.9935	14.7396	16.453	14.7725	23.4025	MRVI1
ENSG00000072954	0.343082	0.169027	0.811361	100.654	99.2666	112.653	108.59	126.001	61.2067	TMEM38A
ENSG00000072958	-0.00946759	0.936396	0.996336	3174.94	3177.4	3254.3	3543.97	3158.72	2931.62	AP1M1
ENSG00000073008	0.264998	0.0307009	0.51116	1265	1040.56	1287.61	971.823	1175.72	1088.22	PVR
ENSG00000073050	0.179065	0.207221	0.844382	1434	1184.23	1763.49	1550.97	1545.03	1456.36	XRCC1
ENSG00000073060	-0.0449347	0.703874	0.973067	2498.94	2525.2	2611.02	2863.92	2477.44	2440.17	SCARB1
ENSG00000073111	-0.0639699	0.644982	0.967532	5395.53	5581.57	6569.66	7091.24	5433.69	5517.6	MCM2
ENSG00000073150	-0.335033	0.127015	0.76501	131.72	131.485	141.079	214.986	165.974	209.723	PANX2
ENSG00000073169	0.0498204	0.740256	0.976633	689.663	613.885	768.566	735.997	583.081	621.968	SELENOO
ENSG00000073282	-0.271665	0.543883	NA	16.1543	13.9321	26.3207	32.906	21.7243	31.5034	TP63
ENSG00000073331	0.096428	0.550096	0.959433	311.902	309.99	365.332	292.863	362.362	369.94	ALPK1
ENSG00000073350	0.171018	0.262536	0.879671	543.032	472.822	581.162	606.567	596.116	451.849	LLGL2
ENSG00000073417	0.0827218	0.588981	0.966195	408.828	423.189	395.864	364.159	482.28	428.447	PDE8A
ENSG00000073464	0.0414085	0.786002	0.981962	730.67	632.171	537.996	651.538	618.709	549.06	CLCN4
ENSG00000073536	0.349118	0.0289629	0.504883	591.495	471.081	712.766	487.008	488.363	448.249	NLE1
ENSG00000073578	-0.032959	0.76931	0.979228	4871.14	4832.71	5037.79	5497.49	4954.02	4878.53	SDHA
ENSG00000073584	-0.158987	0.181031	0.828224	1375.6	1567.37	1273.92	1434.7	1399.92	1518.47	SMARCE1
ENSG00000073605	0.0628113	0.853929	0.987947	26.0954	52.2456	53.6943	42.7778	68.6489	48.6053	GSDMB
ENSG00000073614	-0.12331	0.371692	0.914544	1190.45	1493.35	1250.76	1192.29	1100.99	1170.13	KDM5A
ENSG00000073670	-0.0795424	0.700986	0.972358	130.477	148.9	150.555	168.917	131.215	118.813	ADAM11
ENSG00000073711	-0.195491	0.224107	0.853882	233.616	299.541	249.521	262.151	244.182	270.929	PPP2R3A
ENSG00000073712	-0.0778962	0.842717	0.987024	34.7938	31.3473	21.0566	35.0997	59.0902	55.8061	FERMT2
ENSG00000073734	-0.897236	0.0654047	NA	9.94109	15.6737	12.634	27.4216	18.2484	34.2037	ABCB11
ENSG00000073737	0.198679	0.167189	0.811164	1831.65	1475.07	2202.52	2044.56	2041.22	1777.69	DHRS9
ENSG00000073756	0.205112	0.494334	0.946037	49.7055	54.8578	57.9056	36.1966	53.0074	47.7052	PTGS2
ENSG00000073792	0.0603117	0.57568	0.965769	3012.15	2843.9	2971.09	2822.23	2959.72	2910.02	IGF2BP2
ENSG00000073803	-0.130108	0.376624	0.914819	492.084	494.591	412.709	442.037	417.107	506.755	MAP3K13
ENSG00000073849	0.478909	0.00176453	0.161308	753.038	541.612	720.136	434.359	583.081	495.954	ST6GAL1
ENSG00000073910	0.050996	0.724468	0.976633	3997.56	4500.08	4600.87	3988.2	3601.03	3286.26	FRY
ENSG00000073921	-0.134298	0.377086	0.914819	3388.67	3746.88	2475.2	2722.42	2924.1	3171.95	PICALM
ENSG00000073969	0.0367502	0.802692	0.983438	1931.06	1991.43	1570.82	1429.22	1699.71	1646.28	NSF
ENSG00000074054	0.00170688	0.989035	0.998903	1058.73	1091.93	1049.67	1148.42	1184.41	1051.31	CLASP1
ENSG00000074071	0.211055	0.20587	0.843645	2087.63	1666.63	2611.02	2294.64	1791.82	1647.18	MRPS34
ENSG00000074181	-0.636787	0.264041	NA	6.21318	22.6397	10.5283	12.0655	13.9036	13.5015	NOTCH3
ENSG00000074201	0.129993	0.323835	0.900759	1781.94	1576.95	1430.8	1357.92	1663.22	1518.47	CLNS1A
ENSG00000074211	-1.15856	0.0651344	NA	7.45582	9.57835	5.26415	13.1624	8.68974	25.2027	PPP2R2C
ENSG00000074219	-0.586725	0.0892435	0.69729	19.8822	64.4362	37.9019	55.9401	56.4833	54.0059	TEAD2
ENSG00000074266	-0.0910349	0.532736	0.956004	622.561	687.029	626.434	568.176	649.992	765.983	EED
ENSG00000074276	0.58056	0.195952	NA	29.8233	20.8982	17.8981	17.5498	28.6761	12.6014	CDHR2
ENSG00000074319	-0.114821	0.370447	0.914544	1443.94	1482.03	1179.17	1413.86	1283.47	1332.14	TSG101
ENSG00000074356	-0.0787646	0.607259	0.966212	679.722	788.908	804.362	646.054	587.426	749.782	NCBP3
ENSG00000074370	-0.0780606	0.606146	0.966212	1739.69	1597.84	1746.64	2149.86	1492.9	1509.46	ATP2A3
ENSG00000074416	-0.589328	0.0100669	0.336468	177.697	202.016	93.7019	248.988	147.725	179.119	MGLL
ENSG00000074582	0.238885	0.0702666	0.655741	674.752	600.824	759.09	573.661	690.834	625.568	BCS1L
ENSG00000074590	-0.368664	0.0417289	0.559148	173.969	216.819	182.14	279.701	196.388	219.624	NUAK1
ENSG00000185090	0.866501	0.000157042	0.0445664	121.778	71.4023	153.713	68.0057	115.573	74.7081	MANEAL		shNR4A2 5% CO2 samples			shNR4A2 10% CO2 samples
ENSG00000074621	0.24895	0.14451	0.789751	232.373	183.73	223.2	207.308	253.74	207.023	SLC24A1
ENSG00000074657	0.0580782	0.681074	0.970201	514.452	594.729	605.377	515.527	589.164	531.958	ZNF532
ENSG00000074660	-0.230702	0.399915	0.921543	50.9481	69.6607	64.2226	75.6837	55.6143	55.8061	SCARF1
ENSG00000074695	0.0534595	0.691836	0.971196	2988.54	2888.31	2622.6	2406.52	3128.3	3125.14	LMAN1
ENSG00000074696	0.350289	0.0086259	0.328433	1337.08	1019.66	1185.49	851.168	1145.31	1002.71	HACD3
ENSG00000074706	0.117908	0.445403	0.935911	2046.62	2087.21	1758.23	1389.73	1748.37	1636.38	IPCEF1
ENSG00000074755	0.0234953	0.87451	0.988916	1261.28	1415.85	1407.63	1475.28	1322.58	1037.81	ZZEF1
ENSG00000074800	-0.0514483	0.653791	0.96914	45804.8	44011.7	41243.6	49378.7	43739.8	42147.1	ENO1
ENSG00000074842	0.024467	0.850578	0.987773	2749.96	2564.39	2784.74	3025.15	2530.45	2341.15	MYDGF
ENSG00000074855	0.0723378	0.737793	0.976633	131.72	141.063	150.555	155.755	134.691	100.811	ANO8
ENSG00000074935	0.312555	0.123474	0.761981	710.788	592.987	579.056	331.253	670.848	651.671	TUBE1
ENSG00000074964	0.0521816	0.704966	0.973491	1322.17	1244.32	1279.19	1330.5	1139.22	1032.41	ARHGEF10L
ENSG00000074966	-0.144835	0.74618	NA	16.1543	18.2859	20.0038	18.6467	26.9382	33.3036	TXK
ENSG00000075089	0.109869	0.505038	0.949967	451.077	373.556	344.275	349.9	455.342	434.747	ACTR6
ENSG00000075131	0.079824	0.597516	0.966212	420.011	384.005	408.498	399.259	483.149	459.05	TIPIN
ENSG00000075142	0.0305099	0.834816	0.987024	849.964	839.412	711.713	727.222	935.015	877.595	SRI
ENSG00000075151	-0.0515311	0.647126	0.967532	4627.58	5032.12	4731.42	4500.44	4328.36	4649.91	EIF4G3
ENSG00000075188	0.153185	0.2527	0.872547	717.001	602.565	642.226	596.695	718.641	668.773	NUP37
ENSG00000075213	0.279055	0.462521	0.939682	34.7938	20.0275	27.3736	27.4216	35.6279	33.3036	SEMA3A
ENSG00000075218	-0.0495002	0.759288	0.97836	1028.9	1118.93	1492.91	1329.4	1317.36	1527.47	GTSE1
ENSG00000075223	-0.530099	0.261007	NA	17.3969	18.2859	14.7396	20.8404	12.1656	24.3026	SEMA3C
ENSG00000075234	0.105935	0.456943	0.939178	693.391	662.648	766.46	698.703	629.137	579.663	TTC38
ENSG00000075239	-0.00209549	0.986191	0.998855	1329.62	1315.72	1252.87	1403.99	1417.3	1288.04	ACAT1
ENSG00000075240	-0.0393601	0.809063	0.984032	4336.8	4474.83	3477.5	3747.99	3107.45	2997.33	GRAMD4
ENSG00000075275	0.377229	0.0158952	0.407707	1132.04	812.418	1239.18	1032.15	972.381	730.88	CELSR1
ENSG00000075292	0.020079	0.884225	0.991286	3295.47	3572.73	3139.54	2561.18	3130.91	3296.16	ZNF638
ENSG00000075303	-0.0726615	0.667101	0.96914	1238.91	1262.6	865.426	874.202	943.705	1063.92	SLC25A40
ENSG00000075336	0.113194	0.409011	0.923652	577.826	535.517	548.524	471.652	529.205	521.157	TIMM21
ENSG00000075340	0.0500445	0.690419	0.971196	707.06	700.091	743.298	722.834	745.579	699.376	ADD2
ENSG00000075391	-0.416884	0.00117503	0.134508	1066.18	1543.86	1271.82	1724.27	1251.32	1528.37	RASAL2
ENSG00000075399	-0.201842	0.153351	0.799933	735.641	864.664	801.204	891.752	643.04	749.782	VPS9D1
ENSG00000075407	0.0122576	0.947276	0.997043	342.968	339.596	309.532	231.439	303.272	373.541	ZNF37A
ENSG00000075413	0.0344476	0.783512	0.981751	2496.46	2395.46	2073.02	2068.69	2254.12	2195.34	MARK3
ENSG00000075415	-0.109781	0.330553	0.904131	9440.31	9878.77	8134.16	9464.85	9278.03	9631.05	SLC25A3
ENSG00000075420	0.13875	0.436878	0.934958	2054.08	2058.48	1710.85	1163.77	1647.57	1689.48	FNDC3B
ENSG00000075426	0.22177	0.120233	0.761491	3680.69	3483.91	3787.03	3035.03	3097.89	2539.18	FOSL2
ENSG00000075539	-0.0632112	0.657576	0.96914	1173.05	1601.33	1579.24	1342.56	1390.36	1385.25	FRYL
ENSG00000075568	-0.0579348	0.637836	0.967532	1599.27	1766.77	1525.55	1465.41	1547.64	1629.18	TMEM131
ENSG00000075618	0.129249	0.287905	0.887832	7771.45	6543.76	7046.59	7692.32	7623.5	6284.48	FSCN1
ENSG00000075624	-0.127021	0.256079	0.872547	206496	219194	185474	226768	198809	199191	ACTB
ENSG00000075643	0.369303	0.11182	0.743845	100.654	74.8853	94.7547	77.8774	93.8491	71.1077	MOCOS
ENSG00000075651	0.111448	0.555568	0.961473	214.976	204.628	232.675	163.433	219.85	248.427	PLD1
ENSG00000075702	-0.199459	0.21825	0.852988	653.627	727.955	858.056	1009.12	683.013	785.785	WDR62
ENSG00000075711	0.0663114	0.660654	0.96914	1386.78	1416.73	1168.64	980.598	1272.18	1254.74	DLG1
ENSG00000075785	-0.0269545	0.846351	0.987024	8381.59	8160.76	6318.03	6746.82	6683.28	6874.05	RAB7A
ENSG00000075790	-0.208582	0.095909	0.709121	1260.03	1317.46	1077.04	1295.4	1171.38	1439.26	BCAP29
ENSG00000075826	-0.218544	0.222419	0.853882	181.425	244.683	251.626	263.248	203.34	234.025	SEC31B
ENSG00000075856	0.0777435	0.494299	0.946037	2096.33	2103.75	2238.32	1938.16	2115.95	2069.33	SART3
ENSG00000075884	-0.311739	0.0358885	0.5376	844.993	940.42	699.079	1130.87	961.085	1041.41	ARHGAP15
ENSG00000075914	0.0389274	0.794278	0.982669	795.288	820.255	745.404	731.609	676.93	604.866	EXOSC7
ENSG00000075945	0.073197	0.651575	0.968989	345.453	332.63	288.475	268.732	331.079	314.134	KIFAP3
ENSG00000075975	-0.00531044	0.969438	0.998855	972.985	957.835	839.105	780.968	819.442	898.298	MKRN2
ENSG00000076003	-0.0147487	0.894123	0.992553	4820.19	4918.92	4460.84	4526.76	4534.3	4509.49	MCM6
ENSG00000076043	0.495327	0.00439632	0.253292	269.652	175.023	254.785	189.758	299.796	220.524	REXO2
ENSG00000076053	-0.0353611	0.843508	0.987024	461.018	471.081	319.007	341.125	436.225	432.047	RBM7
ENSG00000076067	0.193015	0.218883	0.853758	388.945	353.528	386.389	368.547	374.528	284.431	RBMS2
ENSG00000076108	-0.0296248	0.815615	0.985333	3263.16	3524.83	3790.19	3776.51	3176.1	3141.34	BAZ2A
ENSG00000076201	-0.086918	0.496237	0.946746	1160.62	1332.26	1343.41	1361.21	1160.08	1198.93	PTPN23
ENSG00000076242	-0.0203669	0.869297	0.988776	1045.06	1093.67	1179.17	1156.1	1173.98	1198.93	MLH1
ENSG00000076248	-0.097707	0.482382	0.94489	1451.4	1605.68	1580.3	1751.69	1343.43	1324.94	UNG
ENSG00000076258	0.395356	0.163248	0.806273	70.8303	42.6672	63.1698	46.0683	69.5179	65.7071	FMO4
ENSG00000076321	-0.0793034	0.585888	0.966005	499.54	474.564	439.03	445.327	422.321	514.856	KLHL20
ENSG00000076351	0.564021	0.0411748	0.559148	110.595	98.3958	146.343	50.4558	86.8974	81.9089	SLC46A1
ENSG00000076382	-0.20303	0.188839	0.830415	1465.07	1777.22	2003.54	2273.8	2016.02	2267.35	SPAG5
ENSG00000076513	-0.15097	0.207591	0.844382	1388.03	1634.42	1312.88	1486.25	1431.2	1467.16	ANKRD13A
ENSG00000076554	-0.0269373	0.855974	0.988096	1339.56	1231.25	1006.51	1276.75	1447.71	1358.25	TPD52
ENSG00000076555	0.330859	0.0474251	0.580331	270.895	212.465	284.264	224.857	244.182	198.022	ACACB
ENSG00000076604	0.231266	0.151725	0.799933	403.857	346.562	511.675	439.843	426.666	359.139	TRAF4
ENSG00000076641	-0.162679	0.290848	0.887832	2321.25	2802.97	1838.24	1988.62	1972.57	2068.43	PAG1
ENSG00000076650	-0.208354	0.161094	0.805055	502.025	550.32	432.713	461.78	433.618	565.262	GPATCH1
ENSG00000076662	0.491835	0.150044	0.798692	43.4923	26.9935	52.6415	39.4872	37.3659	28.8031	ICAM3
ENSG00000076685	-0.200128	0.0958969	0.709121	1463.83	1815.53	1458.17	1571.81	1425.99	1605.77	NT5C2
ENSG00000076716	-0.228857	0.113249	0.746077	407.585	466.727	403.234	517.72	470.115	519.357	GPC4
ENSG00000076770	-0.0797394	0.612328	0.966212	401.372	537.259	477.985	400.356	459.687	477.052	MBNL3
ENSG00000076826	-0.319426	0.0841104	0.686643	243.557	326.535	270.577	355.384	222.457	237.626	CAMSAP3
ENSG00000076864	-0.435105	0.14827	0.798213	38.5217	47.021	41.0604	66.9088	49.5315	62.1068	RAP1GAP
ENSG00000076924	-0.0143327	0.908459	0.99377	2163.43	2064.57	2106.71	2247.48	1877.85	1896.51	XAB2
ENSG00000076928	-0.133912	0.375315	0.914672	6183.36	6450.59	6742.32	7880.98	5154.75	5507.7	ARHGEF1
ENSG00000076944	-0.191982	0.0967441	0.709714	3086.71	3397.7	3142.7	3848.9	3019.68	3320.46	STXBP2
ENSG00000076984	-0.167204	0.305055	0.892206	1301.04	1352.29	1552.92	1798.86	1103.6	1293.44	MAP2K7
ENSG00000077044	0.0534176	0.742771	0.976633	1603	1637.03	2364.66	2075.27	1654.53	1707.49	DGKD
ENSG00000077063	0.194842	0.675078	NA	18.6396	13.9321	21.0566	14.2593	23.4623	27.0029	CTTNBP2
ENSG00000077097	-0.166429	0.187544	0.830302	4946.94	5629.46	4806.17	5677.38	5963.77	6334.89	TOP2B
ENSG00000077147	-0.0864409	0.563083	0.964261	5089.84	5326.44	3736.49	3970.65	4631.63	4988.34	TM9SF3
ENSG00000077150	0.0603424	0.645312	0.967532	631.26	564.252	631.698	629.601	621.316	613.867	NFKB2
ENSG00000077152	0.211148	0.128945	0.765697	634.987	485.013	616.958	591.21	652.599	570.662	UBE2T
ENSG00000077157	0.201564	0.255923	0.872547	514.452	569.477	629.592	405.84	450.997	409.545	PPP1R12B
ENSG00000077232	0.230387	0.120632	0.761638	1714.84	1409.76	1365.52	1062.86	1480.73	1411.35	DNAJC10
ENSG00000077235	0.15814	0.282643	0.886617	1907.45	1791.15	2511	2088.43	1839.62	1729.99	GTF3C1
ENSG00000077238	-0.0441052	0.73843	0.976633	1545.84	1491.61	1457.12	1720.98	1409.48	1337.55	IL4R
ENSG00000077254	-0.0316035	0.800174	0.982834	1768.27	1896.51	1636.1	1550.97	1690.15	1756.99	USP33
ENSG00000077274	0.64157	0.199279	NA	17.3969	6.96607	21.0566	20.8404	33.021	18.9021	CAPN6
ENSG00000077312	-0.0352938	0.809659	0.984111	1561.99	1554.31	1967.74	2120.24	1748.37	1738.09	SNRPA
ENSG00000077327	0.0298576	0.894967	0.992553	93.1978	96.6543	110.547	123.946	134.691	113.412	SPAG6
ENSG00000077348	0.196069	0.221998	0.853882	700.847	641.75	826.471	738.19	648.254	520.257	EXOSC5
ENSG00000077380	0.124991	0.351921	0.908366	1747.15	1510.77	1450.8	1320.63	1680.59	1639.98	DYNC1I2
ENSG00000077420	0.0106136	0.946573	0.997043	3903.12	3470.85	2623.65	2667.58	3026.63	3340.26	APBB1IP
ENSG00000077454	-0.144281	0.293073	0.888137	1123.34	1264.34	1258.13	1365.6	1011.49	1119.72	LRCH4
ENSG00000077458	-0.132956	0.337315	0.906788	687.178	774.976	603.272	642.763	682.144	743.481	FAM76B
ENSG00000077463	0.155071	0.309304	0.893069	741.854	667.002	850.687	818.262	718.641	592.264	SIRT6
ENSG00000077514	-0.168803	0.160923	0.805055	1379.33	1551.69	1516.08	1694.66	1360.81	1539.17	POLD3
ENSG00000077549	-0.0540612	0.630481	0.967532	9267.59	8976.66	8010.98	9156.63	8454.24	8580.63	CAPZB
ENSG00000077585	-0.094279	0.583952	0.966005	222.432	262.099	241.098	210.598	209.423	243.927	GPR137B
ENSG00000077684	0.162806	0.282777	0.886617	849.964	763.656	1007.56	768.903	1001.06	1021.61	JADE1
ENSG00000077713	0.147698	0.372002	0.914544	351.666	314.344	292.687	253.376	293.713	276.33	SLC25A43
ENSG00000077721	0.0294524	0.832854	0.987024	2389.59	2116.82	1768.75	1917.32	2237.61	2230.44	UBE2A
ENSG00000077782	0.197735	0.119418	0.758311	1701.17	1455.91	1421.32	1319.53	1537.21	1285.34	FGFR1
ENSG00000077935	-0.134214	0.540081	0.958	124.264	141.063	118.97	150.271	183.353	179.119	SMC1B
ENSG00000077942	-0.223389	0.308787	0.893069	109.352	140.192	135.815	196.339	167.712	149.416	FBLN1
ENSG00000077984	-0.334616	0.343039	0.907505	28.5806	33.0889	29.4792	38.3903	27.8072	36.904	CST7
ENSG00000078043	0.0438196	0.759169	0.97836	506.996	472.822	468.509	469.458	547.453	535.558	PIAS2
ENSG00000078061	-0.130774	0.25753	0.873443	1794.37	1970.53	1760.33	2024.81	1744.9	1807.4	ARAF
ENSG00000078070	0.151602	0.292647	0.888137	567.885	521.585	641.173	562.692	690.834	628.268	MCCC1
ENSG00000078114	-0.235036	0.408441	0.923518	45.9776	59.2116	49.483	66.9088	72.1248	72.9079	NEBL
ENSG00000078124	0.116478	0.538509	0.957544	648.656	652.199	493.777	371.837	557.012	540.059	ACER3
ENSG00000078140	-0.161254	0.215618	0.849566	3068.07	3494.36	2585.75	2778.36	2846.76	3229.55	UBE2K
ENSG00000078142	-0.1133	0.415327	0.925097	949.375	1070.16	823.313	835.811	862.022	940.602	PIK3C3
ENSG00000078177	-0.236382	0.129256	0.765931	508.238	688.771	475.879	488.105	528.336	603.066	N4BP2
ENSG00000078237	0.0717548	0.722794	0.97641	154.087	130.614	122.128	126.14	151.201	149.416	TIGAR
ENSG00000078246	-0.0512135	0.80083	0.982889	119.293	126.26	120.023	134.914	145.988	139.515	TULP3
ENSG00000078269	-0.437257	0.00108641	0.129579	1256.31	1804.21	1219.18	1813.12	1241.76	1416.75	SYNJ2
ENSG00000078304	-0.152115	0.190311	0.832119	2505.16	2770.76	2212	2586.41	2498.3	2659.79	PPP2R5C
ENSG00000078319	-0.0132808	0.941044	0.997043	265.924	216.819	252.679	321.382	264.168	253.828	PMS2P1
ENSG00000078369	-0.0980672	0.428529	0.931432	13227.9	13748.4	10738.9	12651.2	11682.5	11754.4	GNB1
ENSG00000078399	0.0550136	0.676952	0.969428	1576.91	1381.02	1495.02	1738.53	1711.88	1488.76	HOXA9
ENSG00000078403	-0.201686	0.0923187	0.702046	1487.44	1858.2	1500.28	1770.34	1558.07	1600.37	MLLT10
ENSG00000078487	-0.0924863	0.71268	0.975149	70.8303	93.1713	84.2264	108.59	126.001	100.811	ZCWPW1
ENSG00000078596	-0.421426	0.219735	0.853882	32.3086	37.4427	31.5849	55.9401	32.152	36.0039	ITM2A
ENSG00000078618	-0.113778	0.318712	0.899343	7500.56	8078.91	6669.68	7546.43	7749.51	8092.78	NRDC
ENSG00000078668	0.105631	0.364368	0.91311	3557.67	3143.44	3273.25	3158.97	3709.65	3494.18	VDAC3
ENSG00000078674	-0.153746	0.266654	0.880394	6947.58	8023.18	5635.8	6007.53	6595.51	7301.59	PCM1
ENSG00000078687	0.217516	0.122601	0.761981	480.9	389.229	510.622	437.649	484.018	442.848	TNRC6C
ENSG00000078699	-0.212372	0.158086	0.799933	443.621	634.784	547.472	533.077	469.246	523.857	CBFA2T2
ENSG00000078747	-0.205244	0.188218	0.830302	863.633	981.346	636.962	742.578	769.042	889.297	ITCH
ENSG00000078804	-0.310503	0.0139217	0.386108	920.794	1278.27	952.811	1195.58	1079.27	1190.83	TP53INP2
ENSG00000078808	0.0788475	0.553504	0.960193	4715.81	4210.12	5483.14	5444.84	4740.25	4492.39	SDF4
ENSG00000078814	-0.154835	0.657476	0.96914	32.3086	31.3473	31.5849	52.6495	42.5797	36.0039	MYH7B
ENSG00000078900	-0.200341	0.203336	0.843341	492.084	590.375	543.26	737.094	570.916	522.057	TP73
ENSG00000078902	-0.0070413	0.958022	0.99842	2236.75	2332.76	2508.89	2326.45	1925.65	2043.22	TOLLIP
ENSG00000078967	0.167049	0.367208	0.914544	330.541	306.507	254.785	207.308	279.809	253.828	UBE2D4
ENSG00000079102	-0.335524	0.3977	0.921543	32.3086	27.8643	16.8453	30.7122	23.4623	32.4035	RUNX1T1
ENSG00000079134	0.157004	0.25935	0.875636	781.619	700.961	780.147	597.792	749.055	771.384	THOC1
ENSG00000079150	-0.0338223	0.887547	0.991944	91.9551	80.1099	86.332	88.8461	101.67	117.913	FKBP7
ENSG00000079215	0.305667	0.225313	0.854554	77.0435	60.9532	74.7509	61.4245	77.3386	63.0069	SLC1A3
ENSG00000079246	-0.042578	0.698035	0.972158	10597.2	10585	9442.83	9968.31	10233.9	10625.7	XRCC5
ENSG00000079277	-0.0906678	0.431115	0.931764	1593.06	1754.58	1581.35	1733.05	1602.39	1599.47	MKNK1
ENSG00000079308	0.189452	0.234352	0.861347	759.251	715.764	989.66	867.621	776.862	633.669	TNS1
ENSG00000079313	-0.0610057	0.719389	0.975935	1483.71	1443.72	1800.34	2003.97	1295.64	1331.24	REXO1
ENSG00000079332	-0.0937762	0.486866	0.94489	2725.1	2834.32	2168.83	2288.06	2438.34	2698.49	SAR1A
ENSG00000079335	-0.00316716	0.984525	0.998855	314.387	379.651	410.604	334.544	399.728	414.045	CDC14A
ENSG00000079337	-0.173421	0.591589	0.966212	41.007	34.8304	35.7962	51.5527	40.8418	46.8051	RAPGEF3
ENSG00000079387	0.0510801	0.774761	0.980102	441.136	460.632	372.702	292.863	411.893	426.646	SENP1
ENSG00000079432	-0.309916	0.058037	0.620385	2397.05	2892.66	2967.93	3781.99	2109	2591.38	CIC
ENSG00000079435	0.603889	0.0332112	0.526047	62.1318	47.021	64.2226	40.584	84.2904	51.3056	LIPE
ENSG00000079459	-0.230639	0.155202	0.799933	3721.7	3993.3	3776.5	5889.07	5065.25	4865.03	FDFT1
ENSG00000079462	0.213663	0.196025	0.83682	342.968	270.806	389.547	374.031	391.907	327.636	PAFAH1B3
ENSG00000079482	0.234019	0.288821	0.887832	101.896	115.811	124.234	102.008	145.988	99.9109	OPHN1
ENSG00000079616	-0.0930676	0.539013	0.957544	2146.03	2173.42	2821.58	3048.19	2515.68	2764.2	KIF22
ENSG00000079691	0.136769	0.579898	0.966005	118.05	100.137	88.4377	73.49	79.9456	84.6092	CARMIL1
ENSG00000079739	-0.20854	0.242952	0.866017	360.365	404.903	322.166	525.399	477.066	414.045	PGM1
ENSG00000079785	0.0673457	0.622466	0.966504	2870.49	2652.33	2232	2179.47	2674.7	2587.78	DDX1
ENSG00000079805	0.0822915	0.472288	0.940448	7080.54	6427.07	7003.42	6569.13	6132.35	6097.26	DNM2
ENSG00000079819	-0.135592	0.234996	0.861347	3343.94	3793.03	3558.56	3930.07	3839.12	4080.14	EPB41L2
ENSG00000079931	0.0999341	0.743232	0.976633	79.5288	54.8578	115.811	93.2336	124.263	151.216	MOXD1
ENSG00000079950	-0.0541251	0.716529	0.975219	946.889	1030.11	810.679	752.45	908.946	982.907	STX7
ENSG00000079974	0.00561183	0.969637	0.998855	341.725	339.596	327.43	347.706	361.493	340.237	RABL2B
ENSG00000079999	0.0338751	0.774881	0.980102	3977.68	3934.09	4685.09	4399.53	4236.25	4268.26	KEAP1
ENSG00000080031	0.0215373	0.908551	0.99377	164.028	148.029	154.766	165.627	150.332	148.516	PTPRH
ENSG00000080189	-0.101046	0.403116	0.922963	1220.27	1367.09	1304.46	1400.7	1217.43	1246.64	SLC35C2
ENSG00000080200	0.382442	0.0376089	0.543967	447.349	433.638	556.947	275.313	417.107	378.941	CRYBG3
ENSG00000080298	0.445384	0.0330132	0.524394	203.792	144.546	167.4	102.008	155.546	137.715	RFX3
ENSG00000080345	-0.0426725	0.757956	0.978248	2305.09	2741.15	2380.45	1969.97	2176.78	2353.76	RIF1
ENSG00000080371	-0.0286482	0.864091	0.988729	1677.56	1676.21	1196.01	1153.9	1511.14	1639.08	RAB21
ENSG00000080493	0.176676	0.629138	0.967532	27.338	27.8643	32.6377	26.3248	36.4969	31.5034	SLC4A4
ENSG00000080503	-0.168491	0.162925	0.806273	4636.28	5248.94	5225.19	6083.22	5453.68	5884.84	SMARCA2
ENSG00000080546	0.170747	0.22745	0.857531	750.553	689.641	894.905	680.057	834.215	833.491	SESN1
ENSG00000080561	0.189849	0.441778	0.934958	94.4404	87.9467	112.653	71.2963	74.7317	86.4094	MID2
ENSG00000080603	-0.0925259	0.609879	0.966212	464.746	512.007	468.509	472.749	331.079	360.939	SRCAP
ENSG00000080608	0.284685	0.0601121	0.626103	2748.71	2284	2175.15	1609.1	2239.34	1982.92	PUM3
ENSG00000080709	0.120973	0.407166	0.923518	647.414	633.913	860.162	726.125	749.055	717.378	KCNN2
ENSG00000080802	-0.0735553	0.626407	0.967532	688.421	734.05	601.166	552.82	636.958	737.18	CNOT4
ENSG00000080815	-0.285336	0.0393625	0.554623	3230.86	3994.17	2555.22	3244.53	2763.34	3176.45	PSEN1
ENSG00000080819	0.255158	0.076574	0.66614	627.532	512.007	611.694	440.94	563.095	554.46	CPOX
ENSG00000080822	0.0647223	0.682567	0.970709	617.59	572.96	563.264	454.102	592.64	666.072	CLDND1
ENSG00000080823	-0.218875	0.385357	0.918085	75.8008	80.1099	63.1698	75.6837	60.8281	75.6082	MOK
ENSG00000080824	0.214467	0.0854772	0.68897	32303.6	26245.6	27722.1	22287.2	27499.5	26897.6	HSP90AA1
ENSG00000080839	-0.167827	0.188778	0.830415	1276.19	1613.52	1448.69	1374.37	1390.36	1634.58	RBL1
ENSG00000080845	-0.235536	0.100898	0.719186	775.405	831.575	818.049	1116.61	881.139	969.405	DLGAP4
ENSG00000080947	0.145678	0.670589	0.969372	41.007	40.9257	35.7962	26.3248	38.2348	36.0039	CROCCP3
ENSG00000080986	-0.1956	0.192343	0.834262	1009.02	1074.52	1072.83	1246.04	1244.37	1491.46	NDC80
ENSG00000081014	-0.134768	0.34565	0.907505	652.384	792.391	636.962	601.082	640.433	722.779	AP4E1
ENSG00000081019	0.064845	0.66906	0.969372	585.282	703.574	752.773	550.626	669.11	664.272	RSBN1
ENSG00000081026	0.182581	0.274881	0.881208	269.652	308.249	337.958	264.345	356.279	278.13	MAGI3
ENSG00000081041	-0.758279	0.15233	NA	7.45582	25.252	14.7396	20.8404	12.1656	12.6014	CXCL2
ENSG00000081052	0.219517	0.593556	0.966212	34.7938	15.6737	22.1094	37.2934	37.3659	28.8031	COL4A4
ENSG00000081059	0.0874908	0.654534	0.96914	211.248	168.927	209.513	262.151	251.133	204.322	TCF7
ENSG00000081087	0.191308	0.245347	0.86853	2672.91	2323.19	1979.32	1534.51	2176.78	2118.83	OSTM1
ENSG00000081148	0.206528	0.734024	NA	8.69846	9.57835	13.6868	5.48433	14.7725	17.1019	IMPG2
ENSG00000081154	-0.117011	0.377153	0.914819	1786.91	1807.7	1390.79	1615.68	1639.75	1798.4	PCNP
ENSG00000081177	0.256531	0.109713	0.738358	325.571	308.249	351.645	242.407	332.817	293.432	EXD2
ENSG00000081181	0.0772243	0.894631	NA	6.21318	7.83683	20.0038	16.453	13.9036	14.4016	ARG2
ENSG00000081189	-0.0515072	0.649752	0.967813	5709.92	6110.99	5322.05	5386.71	5820.38	5965.85	MEF2C
ENSG00000081237	-0.299525	0.0109817	0.350969	3388.67	4431.29	3561.72	4285.45	3978.16	4736.32	PTPRC
ENSG00000081307	0.0913536	0.612886	0.966212	566.642	545.095	459.034	393.775	631.744	615.667	UBA5
ENSG00000081320	-0.0884151	0.593312	0.966212	1589.33	1738.91	1127.58	1233.97	1578.92	1592.27	STK17B
ENSG00000081377	0.0450527	0.76059	0.97836	413.798	390.1	394.811	388.29	454.473	446.449	CDC14B
ENSG00000081386	0.0789136	0.619893	0.966212	432.438	421.448	394.811	316.994	387.562	408.644	ZNF510
ENSG00000081665	-0.0845507	0.568676	0.96546	342.968	360.494	351.645	381.709	386.693	405.944	ZNF506
ENSG00000081692	0.320185	0.0224581	0.459017	736.884	547.708	729.611	648.247	676.061	521.157	JMJD4
ENSG00000081721	-0.0477575	0.755568	0.978248	524.393	497.204	427.449	564.886	503.136	442.848	DUSP12
ENSG00000081760	0.0313861	0.824237	0.986071	776.648	705.315	837	925.754	863.76	796.587	AACS
ENSG00000081791	-0.0926962	0.484774	0.94489	1159.38	1310.49	1410.79	1497.22	1247.85	1266.44	KIAA0141
ENSG00000081870	-0.0322108	0.797549	0.982669	1319.68	1181.62	1242.34	1340.37	1294.77	1422.15	HSPB11
ENSG00000081913	0.0334509	0.780885	0.981463	2055.32	2026.26	2104.61	1997.39	1834.4	1831.7	PHLPP1
ENSG00000081923	0.188351	0.30092	0.890986	336.755	310.861	285.317	213.889	266.775	252.027	ATP8B1
ENSG00000081985	0.144621	0.273423	0.880876	769.192	773.234	932.807	762.321	886.353	807.388	IL12RB2
ENSG00000082014	0.0779566	0.635409	0.967532	282.079	254.262	269.524	297.251	277.203	234.926	SMARCD3
ENSG00000082068	-0.090757	0.475162	0.940992	1424.06	1443.72	1168.64	1378.76	1397.31	1425.76	WDR70
ENSG00000082074	-0.00677553	0.973026	0.998855	319.358	350.916	270.577	214.986	343.245	369.94	FYB1
ENSG00000082146	0.0949853	0.557248	0.961657	418.769	375.297	367.438	395.968	505.743	440.148	STRADB
ENSG00000082153	-0.16612	0.203404	0.843341	5836.67	6527.21	4635.61	5368.06	5424.13	5937.95	BZW1
ENSG00000082175	0.122264	0.556673	0.961473	118.05	141.063	183.192	140.399	165.105	148.516	PGR
ENSG00000082196	-0.356776	0.271482	0.880876	37.2791	37.4427	35.7962	60.3276	39.1038	46.8051	C1QTNF3
ENSG00000082212	0.14608	0.249795	0.872155	1713.6	1476.81	1565.56	1330.5	1647.57	1642.68	ME2
ENSG00000082213	-0.122946	0.27546	0.881208	1779.46	1963.56	1718.22	1838.35	1755.33	1917.21	C5orf22
ENSG00000082258	-0.122829	0.383677	0.917608	777.891	917.78	743.298	714.059	809.014	903.698	CCNT2
ENSG00000082269	0.256005	0.180899	0.828046	354.151	329.147	323.219	196.339	327.603	313.234	FAM135A
ENSG00000082397	0.0186093	0.908375	0.99377	479.658	498.074	391.653	415.712	547.453	486.953	EPB41L3
ENSG00000082458	-0.951373	0.0205386	0.445395	14.9116	28.7351	14.7396	44.9715	27.8072	39.6043	DLG3
ENSG00000082512	0.313182	0.574686	NA	11.1837	10.4491	11.5811	9.87179	19.9864	14.4016	TRAF5
ENSG00000082515	0.115793	0.384336	0.917707	720.729	606.049	620.117	640.569	699.524	636.369	MRPL22
ENSG00000082516	0.374532	0.0131315	0.379086	890.971	811.548	1005.45	580.242	920.243	778.585	GEMIN5
ENSG00000082641	0.0238393	0.846176	0.987024	3524.12	3451.69	4066.03	3973.94	3490.67	3475.28	NFE2L1
ENSG00000082701	-0.213924	0.131473	0.76924	1434	1819.89	1507.65	1600.33	1213.96	1396.95	GSK3B
ENSG00000082781	-0.211516	0.0920538	0.701638	1161.87	1212.1	1055.99	1393.02	1081.87	1216.03	ITGB5
ENSG00000082805	0.141381	0.338335	0.90706	632.502	587.763	576.951	502.364	523.122	477.952	ERC1
ENSG00000082898	0.164568	0.19893	0.840884	5189.25	5125.29	5980.07	4457.66	5912.5	5657.12	XPO1
ENSG00000082996	-0.117008	0.430394	0.931649	784.104	833.317	595.902	682.25	720.379	759.683	RNF13
ENSG00000083093	0.230405	0.102027	0.721248	638.715	558.157	614.853	460.683	574.391	536.458	PALB2
ENSG00000083097	0.04497	0.768143	0.978698	689.663	791.52	748.562	580.242	632.613	632.769	DOPEY1
ENSG00000083099	-0.0112651	0.933493	0.995869	2062.78	1867.78	1582.4	1660.65	1742.29	1897.41	LYRM2
ENSG00000083123	-0.0140661	0.9205	0.994292	424.982	429.284	464.298	432.165	429.273	469.851	BCKDHB
ENSG00000083168	-0.128787	0.309146	0.893069	2680.37	3391.61	3083.74	2816.75	2638.2	2976.62	KAT6A
ENSG00000083223	-0.0773706	0.629583	0.967532	859.905	1078.87	847.528	691.025	877.663	955.004	ZCCHC6
ENSG00000083290	0.195016	0.320801	0.899879	192.609	198.533	188.457	130.527	190.305	168.318	ULK2
ENSG00000083312	-0.121679	0.34892	0.907505	6052.88	8076.29	7643.54	6824.7	7261.14	7901.96	TNPO1
ENSG00000083444	0.0520539	0.710341	0.975149	2311.3	2089.82	2395.19	2737.78	2346.23	1978.42	PLOD1
ENSG00000083454	-0.112553	0.855795	NA	11.1837	13.9321	8.42264	14.2593	11.2967	5.40059	P2RX5
ENSG00000083457	0.0203186	0.909818	0.99377	277.108	209.853	230.57	282.991	228.54	233.125	ITGAE
ENSG00000083520	-0.0976466	0.435261	0.934958	1765.79	2002.75	1586.61	1665.04	1732.73	1771.39	DIS3
ENSG00000083535	0.278023	0.128769	0.765697	360.365	318.698	311.638	209.501	355.41	316.834	PIBF1
ENSG00000083544	-0.118367	0.456052	0.939178	326.813	343.079	305.321	296.154	309.355	380.741	TDRD3
ENSG00000083635	0.186104	0.253878	0.872547	393.916	370.073	387.441	276.41	392.776	383.442	NUFIP1
ENSG00000083642	-0.0801157	0.541787	0.958249	1540.87	1732.81	1492.91	1399.6	1608.47	1773.19	PDS5B
ENSG00000083720	0.0640037	0.645742	0.967532	1168.08	1110.22	1293.93	1250.43	1458.14	1392.45	OXCT1
ENSG00000083750	0.15017	0.401987	0.92208	223.675	208.982	217.936	185.37	189.436	172.819	RRAGB
ENSG00000083799	0.0098963	0.944419	0.997043	794.045	868.147	709.607	674.572	780.338	723.679	CYLD
ENSG00000083807	0.223661	0.424202	0.928927	60.8892	44.4087	81.0679	66.9088	72.1248	72.9079	SLC27A5
ENSG00000083812	-0.0759891	0.619663	0.966212	371.548	349.175	345.328	426.681	354.541	354.639	ZNF324
ENSG00000083814	-0.240627	0.197439	0.83867	206.278	251.649	254.785	253.376	262.43	351.038	ZNF671
ENSG00000083817	0.184204	0.320281	0.899879	203.792	191.567	177.928	149.174	205.078	174.619	ZNF416
ENSG00000083828	0.266104	0.1282	0.76501	205.035	187.213	225.306	164.53	207.685	178.219	ZNF586
ENSG00000083838	-0.0169589	0.945393	0.997043	89.4699	98.3958	137.921	123.946	84.2904	93.6102	ZNF446
ENSG00000083844	-0.15867	0.270834	0.880876	489.599	598.212	602.219	561.595	484.887	599.465	ZNF264
ENSG00000083845	0.133198	0.281992	0.886617	15612.5	12889	14201.6	14607	13354.4	11865.1	RPS5
ENSG00000083857	0.377312	0.0111304	0.352942	2705.22	2528.69	3520.66	2462.46	2758.12	1926.21	FAT1
ENSG00000083896	-0.139058	0.218043	0.852915	1886.32	2064.57	1805.6	1983.13	1910.87	2121.53	YTHDC1
ENSG00000083937	-0.078248	0.614643	0.966212	551.731	573.83	443.241	465.071	549.191	589.564	CHMP2B
ENSG00000084070	-0.0915305	0.394756	0.921543	29943.8	31094.8	27663.1	30728.7	27489.1	28844.5	SMAP2
ENSG00000084072	0.0821904	0.516767	0.95179	4635.04	4140.46	5356.8	5213.4	4929.69	4744.42	PPIE
ENSG00000084073	0.174943	0.217608	0.852437	24010.2	21416.3	20265.9	15564.5	21353.3	21149.6	ZMPSTE24
ENSG00000084090	0.0565542	0.648784	0.967532	5342.1	5258.52	4696.67	4344.68	4676.82	4542.79	STARD7
ENSG00000084092	0.0614106	0.632187	0.967532	774.163	693.995	751.721	740.384	698.655	696.676	NOA1
ENSG00000084093	-0.095716	0.477344	0.941755	1148.2	1322.68	1362.36	1170.36	1172.25	1441.06	REST
ENSG00000084110	-0.00554462	0.972721	0.998855	415.041	390.971	371.649	445.327	510.087	468.051	HAL
ENSG00000084112	-0.323925	0.0185301	0.433488	1453.89	1949.63	1440.27	1828.47	1301.72	1472.56	SSH1
ENSG00000084207	0.0407503	0.724422	0.976633	4313.19	3801.74	4099.72	4452.18	4139.79	3950.53	GSTP1
ENSG00000084234	-0.110673	0.291365	0.887832	29077.7	30721.3	28045.3	32325.7	28808.2	29736.5	APLP2
ENSG00000084444	-0.0354331	0.865106	0.988729	140.418	150.641	109.494	133.818	152.07	127.814	FAM234B
ENSG00000084463	-0.108273	0.355591	0.909303	1595.55	1712.78	1490.81	1554.26	1518.97	1694.88	WBP11
ENSG00000084623	0.0870207	0.456088	0.939178	3836.02	3371.58	3769.13	3884	3635.79	3328.56	EIF3I
ENSG00000084628	0.470774	0.206235	0.844292	26.0954	30.4766	44.2189	39.4872	58.2212	24.3026	NKAIN1
ENSG00000084652	-0.0145015	0.904255	0.993741	2858.06	3086.84	3451.18	3084.39	2920.62	3152.14	TXLNA
ENSG00000084676	-0.0196787	0.888888	0.991944	680.965	740.145	615.905	603.276	634.351	612.067	NCOA1
ENSG00000084693	0.0137482	0.925423	0.995548	426.224	443.217	526.415	505.655	496.184	488.753	AGBL5
ENSG00000084710	-0.614703	0.0887828	0.69498	21.1248	33.9596	29.4792	42.7778	35.6279	56.7062	EFR3B
ENSG00000084731	-0.0596227	0.7516	0.977866	203.792	173.281	171.611	236.923	201.602	192.621	KIF3C
ENSG00000084733	0.282987	0.0400306	0.557681	3888.21	3393.35	3428.01	2483.3	3706.17	3179.15	RAB10
ENSG00000084754	-0.0757521	0.502024	0.949967	6943.85	7073.18	6319.08	7056.14	7286.34	7528.42	HADHA
ENSG00000084764	0.057948	0.83601	0.987024	78.2861	51.3748	65.2755	70.1994	51.2694	64.8071	MAPRE3
ENSG00000084774	0.326017	0.0352686	0.535806	1622.88	1501.19	2459.41	1667.24	1810.07	1533.77	CAD
ENSG00000085063	0.112012	0.555454	0.961473	173.969	151.512	202.143	206.211	211.161	188.12	CD59
ENSG00000085117	-0.118137	0.511016	0.950908	2850.61	2637.53	3609.1	4737.36	3422.02	3354.67	CD82
ENSG00000085185	0.219351	0.309359	0.893069	171.484	156.737	269.524	247.892	238.099	181.82	BCORL1
ENSG00000085224	-0.0196721	0.912458	0.99377	1819.22	2059.35	1515.02	1173.65	1737.08	1904.61	ATRX
ENSG00000085231	0.108205	0.512743	0.950974	744.339	581.667	509.57	539.658	689.096	679.574	AK6
ENSG00000085274	0.00986285	0.951633	0.997043	424.982	423.189	381.124	344.416	450.997	479.752	MYNN
ENSG00000085365	0.0349166	0.831575	0.987024	361.607	393.583	347.434	285.185	374.528	377.141	SCAMP1
ENSG00000085377	0.115475	0.355808	0.909303	2623.21	2440.74	2302.54	2045.65	2549.57	2411.36	PREP
ENSG00000085382	0.0123022	0.930885	0.99557	544.275	547.708	487.46	459.587	501.398	510.356	HACE1
ENSG00000085415	-0.0580905	0.634811	0.967532	1373.11	1551.69	1446.59	1331.59	1422.51	1531.97	SEH1L
ENSG00000085433	0.0548828	0.731224	0.976633	416.283	390.971	383.23	311.51	357.148	407.744	WDR47
ENSG00000085449	-0.0307205	0.782181	0.981637	3678.2	4041.19	3768.08	3597.72	3691.4	3737.21	WDFY1
ENSG00000085465	0.186503	0.723226	0.976535	54.676	55.7286	24.2151	16.453	18.2484	11.7013	OVGP1
ENSG00000085491	0.0391549	0.79259	0.982669	1724.78	1721.49	1433.95	1285.53	1738.82	1756.99	SLC25A24
ENSG00000085511	-0.0594508	0.612499	0.966212	1429.03	1587.39	1412.9	1429.22	1448.58	1453.66	MAP3K4
ENSG00000085514	0.301835	0.359012	0.911676	60.8892	42.6672	38.9547	41.6809	42.5797	30.6033	PILRA
ENSG00000085552	-0.48712	0.178016	0.822174	27.338	30.4766	25.2679	44.9715	27.8072	37.8041	IGSF9
ENSG00000085563	-0.737749	0.0295185	0.507681	41.007	61.8239	23.1623	46.0683	29.5451	46.8051	ABCB1
ENSG00000085644	0.0478599	0.749076	0.976808	504.511	490.238	618.011	612.051	549.191	517.556	ZNF213
ENSG00000085662	0.0465516	0.775209	0.980102	864.875	778.459	1116	1145.13	1081	1045.01	AKR1B1
ENSG00000085719	-0.0337909	0.814875	0.98514	1171.81	1268.7	1066.52	925.754	1096.64	1216.03	CPNE3
ENSG00000085721	0.103766	0.499003	0.948546	1099.73	1071.03	921.226	746.965	951.526	944.203	RRN3
ENSG00000085733	-0.115792	0.577589	0.966005	156.572	166.315	183.192	241.31	237.23	221.424	CTTN
ENSG00000085741	-0.239349	0.705464	NA	2.48527	8.70759	15.7924	23.0342	17.3795	11.7013	WNT11
ENSG00000085760	0.0979198	0.530664	0.956004	1175.53	1048.39	919.12	838.005	1174.85	1166.53	MTIF2
ENSG00000085788	-0.138284	0.308753	0.893069	1160.62	1285.24	1008.61	1068.35	1173.11	1323.14	DDHD2
ENSG00000085831	0.697183	0.149902	NA	14.9116	12.1906	26.3207	10.9687	29.5451	20.7023	TTC39A
ENSG00000085832	-0.222084	0.0717079	0.658792	1603	2025.39	1548.71	1703.43	1704.06	1934.31	EPS15
ENSG00000085840	-0.30133	0.0252208	0.473974	1189.2	1507.28	1344.46	1795.57	1277.39	1396.95	ORC1
ENSG00000085871	0.130857	0.337596	0.906788	789.074	658.294	870.69	809.487	794.242	774.984	MGST2
ENSG00000085872	-0.0717676	0.586014	0.966005	2064.02	2372.82	2576.27	2599.57	2169.83	2187.24	CHERP
ENSG00000085978	-0.17571	0.177004	0.821293	933.22	1017.92	824.366	1010.21	829.87	892.897	ATG16L1
ENSG00000085982	0.0532198	0.716435	0.975219	582.797	622.593	759.09	692.122	747.317	702.076	USP40
ENSG00000085998	0.230357	0.116519	0.754087	925.764	703.574	991.766	822.649	742.972	740.781	POMGNT1
ENSG00000085999	0.0453186	0.746615	0.976633	910.853	868.147	1126.53	961.951	943.705	1059.42	RAD54L
ENSG00000086015	0.259519	0.038432	0.548908	1453.89	1230.38	1433.95	1195.58	1295.64	1067.52	MAST2
ENSG00000086061	0.530524	0.00106731	0.128426	7414.81	5100.91	6737.06	3449.64	6282.68	5592.31	DNAJA1
ENSG00000086062	-0.0848438	0.476516	0.941288	1819.22	1941.79	1676.11	1883.32	1714.48	1699.38	B4GALT1
ENSG00000086065	0.0356035	0.7875	0.982442	1809.28	1644.86	1542.4	1580.58	1883.93	1882.1	CHMP5
ENSG00000086102	-0.0518486	0.634579	0.967532	2788.48	2878.73	2888.97	2878.17	2707.72	2934.32	NFX1
ENSG00000086189	0.0387357	0.771946	0.979994	895.941	895.141	791.728	761.225	812.49	774.984	DIMT1
ENSG00000086200	0.00916224	0.950665	0.997043	387.703	426.672	423.238	405.84	477.066	449.149	IPO11
ENSG00000086205	-0.368756	0.457626	NA	12.4264	14.8029	11.5811	19.7436	24.3313	28.8031	FOLH1
ENSG00000086232	-0.112947	0.306388	0.892834	2754.93	2908.34	2636.29	3066.84	2829.38	2916.32	EIF2AK1
ENSG00000086289	0.270853	0.0877627	0.692576	534.334	443.217	649.596	523.205	692.572	591.364	EPDR1
ENSG00000086300	-0.164431	0.362798	0.912913	345.453	370.943	332.694	419.003	477.066	507.655	SNX10
ENSG00000086475	0.0816886	0.531531	0.956004	1205.36	1178.14	1487.65	1320.63	1279.13	1256.54	SEPHS1
ENSG00000086504	-0.0365523	0.803962	0.983931	1573.18	1477.68	1722.43	2063.2	1618.9	1503.16	MRPL28
ENSG00000086544	0.0743736	0.667826	0.96914	210.006	188.084	233.728	232.535	226.802	217.824	ITPKC
ENSG00000086548	-0.0685323	0.679873	0.970147	253.498	257.745	289.528	324.672	301.534	306.033	CEACAM6
ENSG00000086589	-0.163502	0.162749	0.806273	2077.69	2298.8	1843.51	2130.11	1923.04	2114.33	RBM22
ENSG00000086598	-0.0148018	0.924799	0.995289	4749.36	4888.44	3638.58	3567.01	4898.4	4965.84	TMED2
ENSG00000086619	-0.231127	0.26333	0.879671	144.146	180.247	175.823	240.214	230.278	229.525	ERO1B
ENSG00000086666	-0.205748	0.11854	0.758311	1207.84	1218.19	977.026	1364.5	1167.9	1284.44	ZFAND6
ENSG00000086712	0.0725164	0.627425	0.967532	443.621	458.019	457.981	365.256	444.045	454.549	TXLNG
ENSG00000086730	-0.0906589	0.555082	0.961473	7677.01	7294.35	6026.4	7809.68	5734.36	5592.31	LAT2
ENSG00000086758	0.464917	0.00103119	0.127464	5277.48	4359.02	6830.76	4845.95	5682.22	3686.8	HUWE1
ENSG00000086827	0.126362	0.361477	0.912022	669.781	624.334	610.641	525.399	660.42	626.468	ZW10
ENSG00000086848	-0.0809335	0.752256	0.978248	67.1024	74.8853	92.649	72.3931	77.3386	103.511	ALG9
ENSG00000087008	-0.0215466	0.887304	0.991944	552.973	632.171	736.981	727.222	629.137	591.364	ACOX3
ENSG00000087053	0.0260118	0.865193	0.988729	1425.3	1496.84	1189.7	1066.15	1465.09	1441.96	MTMR2
ENSG00000087074	-0.426669	0.0096309	0.335579	719.487	905.59	689.604	1136.35	643.04	717.378	PPP1R15A
ENSG00000087076	-0.0638311	0.853842	0.987947	53.4334	52.2456	35.7962	35.0997	30.4141	36.0039	HSD17B14
ENSG00000087077	0.121211	0.398832	0.921543	1938.51	1728.46	2393.08	2245.28	1944.76	1799.3	TRIP6
ENSG00000087086	0.0454833	0.677822	0.969428	57981.4	54307.5	60545.1	61097.6	62598.2	60101.3	FTL
ENSG00000087087	-0.0212142	0.85279	0.98785	5482.51	5517.13	5694.76	5662.02	4949.67	5185.46	SRRT
ENSG00000087088	0.0405441	0.783607	0.981751	1569.45	1469.84	1957.21	1904.16	1518.1	1532.87	BAX
ENSG00000087095	0.263352	0.0811384	0.678811	566.642	458.019	607.483	413.518	491.839	513.956	NLK
ENSG00000087111	0.0325734	0.793531	0.982669	2296.39	2244.82	2502.58	2675.25	2500.91	2220.54	PIGS
ENSG00000087116	0.0983649	0.484031	0.94489	1719.81	1475.07	1587.67	1734.14	1491.16	1273.64	ADAMTS2
ENSG00000087152	-0.0513018	0.691771	0.971196	3160.03	3395.96	3496.45	3579.07	2891.94	2919.02	ATXN7L3
ENSG00000087157	0.057795	0.66307	0.96914	1122.1	1086.71	1254.97	1127.58	996.713	1026.11	PGS1
ENSG00000087191	0.0175171	0.872065	0.988916	2548.65	2456.41	2470.99	2473.43	2478.31	2477.07	PSMC5
ENSG00000087206	0.0658466	0.598207	0.966212	818.898	759.302	776.988	737.094	757.745	750.682	UIMC1
ENSG00000087237	0.033328	0.951679	NA	11.1837	10.4491	13.6868	14.2593	13.0346	12.6014	CETP
ENSG00000087245	-0.302548	0.0607247	0.628367	1190.45	1431.53	852.792	1147.32	912.422	1062.12	MMP2
ENSG00000087253	-0.128726	0.416395	0.925874	2759.9	3102.52	2063.55	2099.4	2336.67	2621.99	LPCAT2
ENSG00000087263	0.164577	0.210516	0.847363	1228.97	1100.64	1086.52	926.851	1204.4	1110.72	OGFOD1
ENSG00000087266	-0.122396	0.405276	0.923195	2860.55	3153.02	3152.17	3512.16	2450.51	2547.28	SH3BP2
ENSG00000087269	-0.0111089	0.930209	0.99557	3019.61	2977.13	2679.45	2487.69	2526.97	2820.01	NOP14
ENSG00000087274	-0.137492	0.249236	0.870725	3988.86	4266.72	4000.75	4956.73	4095.47	4072.94	ADD1
ENSG00000087299	0.391021	0.0414592	0.559148	284.564	178.506	279	177.692	205.078	227.725	L2HGDH
ENSG00000087301	0.137747	0.383685	0.917608	265.924	252.52	273.736	236.923	268.513	244.827	TXNDC16
ENSG00000087302	0.0379068	0.776368	0.980246	1463.83	1396.7	1181.28	1288.82	1509.41	1360.95	RTRAF
ENSG00000087338	-0.0140048	0.912593	0.99377	796.53	905.59	860.162	796.324	848.987	828.09	GMCL1
ENSG00000087365	-0.12228	0.258168	0.874221	6910.3	7352.69	6670.73	7870.01	6952.66	7128.78	SF3B2
ENSG00000087448	0.116554	0.384815	0.918085	1426.55	1531.67	1531.87	1184.61	1567.63	1457.26	KLHL42
ENSG00000087460	-0.0898198	0.434652	0.934381	14729	14407.6	12925.6	15976.9	14995.9	15007.3	GNAS
ENSG00000087470	0.0740295	0.647932	0.967532	1589.33	1570.85	1350.78	1020.08	1315.63	1447.36	DNM1L
ENSG00000087495	-0.0647141	0.585311	0.966005	2716.4	2707.19	2506.79	3028.45	2755.51	2611.18	PHACTR3
ENSG00000087502	0.018286	0.916204	0.993827	1481.22	1388.86	985.449	993.76	1371.24	1404.15	ERGIC2
ENSG00000087510	-0.487641	0.337034	NA	8.69846	17.4152	13.6868	18.6467	15.6415	18.002	TFAP2C
ENSG00000087586	-0.212334	0.168725	0.811361	1402.94	1584.78	1611.88	1850.41	1869.16	2226.84	AURKA
ENSG00000087589	-0.382116	0.0558086	0.610974	155.33	195.921	112.653	165.627	139.036	167.418	CASS4
ENSG00000087842	0.321717	0.101614	0.719981	290.777	235.105	434.819	300.541	400.597	367.24	PIR
ENSG00000087884	-0.0240159	0.88867	0.991944	223.675	201.145	200.038	238.02	222.457	218.724	AAMDC
ENSG00000087903	-0.513668	0.00248605	0.196528	979.198	1155.5	742.245	1500.51	814.228	964.005	RFX2
ENSG00000087995	0.248329	0.0855322	0.68897	564.157	471.081	528.521	395.968	509.218	478.852	METTL2A
ENSG00000088002	-0.0500178	0.90064	0.993268	37.2791	23.5105	21.0566	40.584	26.9382	24.3026	SULT2B1
ENSG00000088035	0.241607	0.1633	0.806273	265.924	262.099	288.475	201.823	312.83	269.129	ALG6
ENSG00000088038	-0.209097	0.0936454	0.705818	1668.86	1929.6	1825.61	2195.92	1652.79	1826.3	CNOT3
ENSG00000088179	-0.00666665	0.97488	0.998855	129.234	153.254	169.506	117.365	127.739	156.617	PTPN4
ENSG00000088205	0.0935599	0.454918	0.939178	3167.48	2998.9	2926.87	2473.43	2720.76	2784.9	DDX18
ENSG00000088247	-0.10941	0.392712	0.921543	11139	11690.8	12540.3	13661.5	10226.1	11225.1	KHSRP
ENSG00000088256	0.328514	0.0683094	0.650509	523.15	380.522	734.875	582.436	570.916	495.954	GNA11
ENSG00000088298	0.114952	0.391838	0.921543	652.384	560.769	605.377	619.729	610.019	544.559	EDEM2
ENSG00000088305	0.0164458	0.935367	0.996332	151.602	187.213	248.468	228.148	208.554	189.021	DNMT3B
ENSG00000088325	-0.162484	0.289795	0.887832	2650.54	3132.12	3189.02	3516.55	3806.1	4151.25	TPX2
ENSG00000088340	0.107473	0.764611	0.97836	28.5806	40.0549	31.5849	36.1966	56.4833	33.3036	FER1L4
ENSG00000088356	-0.0425794	0.765774	0.97836	541.79	505.911	558	592.307	477.066	525.657	PDRG1
ENSG00000088367	-0.29731	0.189536	0.831364	156.572	155.866	88.4377	150.271	115.573	135.015	EPB41L1
ENSG00000088387	0.290375	0.346053	0.907505	63.3745	42.6672	38.9547	46.0683	68.6489	51.3056	DOCK9
ENSG00000088448	-0.143106	0.294158	0.888858	936.948	1106.74	865.426	941.111	848.118	876.695	ANKRD10
ENSG00000088451	0.227485	0.260249	0.876543	325.571	264.711	283.211	182.08	311.093	336.637	TGDS
ENSG00000088543	0.110912	0.764492	0.97836	36.0365	35.7011	32.6377	36.1966	31.283	20.7023	C3orf18
ENSG00000088682	0.234469	0.0671068	0.647791	735.641	597.341	738.034	612.051	714.296	649.871	COQ9
ENSG00000088727	-0.229092	0.205723	0.843341	162.785	197.662	174.77	232.535	199.864	202.522	KIF9
ENSG00000088766	0.244142	0.110531	0.739189	554.216	423.189	421.132	383.903	493.577	431.147	CRLS1
ENSG00000088808	-0.363956	0.146546	0.795394	62.1318	80.9806	64.2226	86.6524	82.5525	102.611	PPP1R13B
ENSG00000088812	-0.121342	0.441074	0.934958	2188.28	2578.32	1881.41	1963.39	1715.35	1747.09	ATRN
ENSG00000088826	-0.486706	0.0149598	0.393541	243.557	296.058	176.875	321.382	176.402	216.924	SMOX
ENSG00000088827	-0.0502638	0.902032	0.993741	232.373	274.289	414.815	478.233	517.908	455.45	SIGLEC1
ENSG00000088832	-0.012682	0.909405	0.99377	2767.35	2607.92	2638.39	2837.59	2635.6	2666.99	FKBP1A
ENSG00000088833	0.0546807	0.672397	0.969428	784.104	728.826	815.943	759.031	707.344	732.68	NSFL1C
ENSG00000088836	0.394199	0.133319	0.770397	134.205	84.4637	207.407	122.849	102.539	130.514	SLC4A11
ENSG00000088854	-0.244119	0.127074	0.76501	1035.12	1165.08	844.37	1036.54	725.593	879.396	C20orf194
ENSG00000088876	0.489176	0.067708	0.650509	119.293	69.6607	141.079	65.8119	83.4215	108.012	ZNF343
ENSG00000088882	-0.572955	0.184616	0.829489	12.4264	21.769	24.2151	48.2621	31.283	33.3036	CPXM1
ENSG00000088888	0.0644883	0.586663	0.966093	1877.62	1798.12	1850.87	1694.66	1664.08	1661.58	MAVS
ENSG00000088899	-0.61106	0.098417	0.715457	19.8822	46.1502	24.2151	40.584	33.021	32.4035	LZTS3
ENSG00000088930	-0.178575	0.135167	0.775691	5304.82	6175.43	4708.26	5154.17	5013.11	5673.32	XRN2
ENSG00000088970	-0.186291	0.237172	0.861657	313.144	369.202	287.423	304.929	318.913	370.84	KIZ
ENSG00000197632	0.828934	2.14267e-05	0.0178933	260.954	119.294	300.057	154.658	229.409	171.019	SERPINB2
ENSG00000088992	0.136401	0.609039	0.966212	91.9551	86.2052	138.974	121.752	79.9456	75.6082	TESC
ENSG00000089006	-0.0329892	0.785207	0.981924	1393	1404.53	1342.36	1445.67	1535.48	1521.17	SNX5
ENSG00000089009	0.0134058	0.913066	0.99377	20564.4	19633.9	16617.9	18080.7	18125.9	17079.4	RPL6
ENSG00000089022	-0.0160144	0.895103	0.992553	917.066	908.202	886.483	910.398	867.236	881.196	MAPKAPK5
ENSG00000089041	0.254607	0.359344	0.911676	67.1024	59.2116	55.8	50.4558	65.173	47.7052	P2RX7
ENSG00000089048	0.239313	0.23811	0.862099	470.959	389.229	323.219	234.729	404.942	388.842	ESF1
ENSG00000089050	0.114926	0.688852	0.971196	62.1318	50.504	49.483	57.037	79.0766	69.3075	RBBP9
ENSG00000089053	-0.0204926	0.867844	0.988729	3235.83	3289.73	3661.74	3889.48	3395.08	3263.76	ANAPC5
ENSG00000089057	-0.172159	0.209747	0.847106	966.771	1253.89	1029.67	1086.99	936.753	963.105	SLC23A2
ENSG00000089060	0.0344264	0.785472	0.981962	1226.48	1147.66	1187.59	1171.45	1049.72	1061.22	SLC8B1
ENSG00000089063	0.0447197	0.745013	0.976633	1310.98	1161.59	1003.35	1039.83	1164.42	1168.33	TMEM230
ENSG00000089091	-0.0160956	0.916586	0.99399	1491.16	1347.06	1808.76	2002.88	1676.25	1685.88	DZANK1
ENSG00000089094	-0.108502	0.421385	0.927876	3209.73	3616.26	3627	3990.4	3042.28	3045.03	KDM2B
ENSG00000089123	0.196191	0.399022	0.921543	123.021	107.103	116.864	77.8774	92.1112	102.611	TASP1
ENSG00000089127	-0.139094	0.423155	0.928176	439.893	438.863	558	624.116	557.012	652.571	OAS1
ENSG00000089154	0.278562	0.027729	0.497012	4181.47	3599.72	5109.38	4086.92	4326.62	3541.89	GCN1
ENSG00000089157	0.0743265	0.5128	0.950974	43151.8	37865	39568.5	42286.4	39901.5	36313.6	RPLP0
ENSG00000089159	0.0301245	0.801849	0.983438	1399.21	1372.32	1466.59	1500.51	1404.26	1310.54	PXN
ENSG00000089163	0.518345	0.240163	NA	27.338	22.6397	21.0566	10.9687	31.283	21.6024	SIRT4
ENSG00000089177	0.183188	0.355757	0.909303	139.175	152.383	177.928	127.236	153.808	135.015	KIF16B
ENSG00000089195	0.040452	0.790687	0.982669	754.281	669.614	553.789	637.279	620.447	566.162	TRMT6
ENSG00000089220	-0.038367	0.767397	0.978698	2674.15	2627.95	3080.58	3312.53	2763.34	2810.11	PEBP1
ENSG00000089234	-0.264514	0.0474115	0.580331	836.295	1013.56	704.343	887.364	809.014	919.9	BRAP
ENSG00000089248	-0.00704055	0.964153	0.998855	3283.05	3092.07	4269.23	4637.55	3896.48	3779.51	ERP29
ENSG00000089280	-0.245008	0.050856	0.591848	15454.7	18356.5	17990.8	21702.6	15437.3	17874.1	FUS
ENSG00000089289	0.0265495	0.849425	0.9875	1009.02	905.59	765.407	908.205	961.954	872.195	IGBP1
ENSG00000089327	0.0122573	0.929438	0.99557	1696.2	1502.93	1256.03	1496.12	1444.23	1358.25	FXYD5
ENSG00000089335	0.0925598	0.604457	0.966212	478.415	417.964	375.86	322.478	470.984	500.454	ZNF302
ENSG00000089351	0.0728898	0.648806	0.967532	545.518	507.653	671.705	672.379	553.536	505.855	GRAMD1A
ENSG00000089486	0.0531062	0.686564	0.971196	707.06	681.805	764.354	746.965	691.703	657.071	CDIP1
ENSG00000089505	0.824746	0.0121586	0.367759	53.4334	32.2181	67.3811	25.2279	44.3176	35.1038	CMTM1
ENSG00000089558	0.324214	0.408019	0.923518	43.4923	28.7351	28.4264	19.7436	25.2002	27.903	KCNH4
ENSG00000089597	-0.0885803	0.487615	0.94489	9316.05	9820.42	11132.6	12289.3	10380.8	10676.1	GANAB
ENSG00000089639	-0.288924	0.0202486	0.44319	3215.94	3881.85	3460.65	4445.6	3078.77	3592.29	GMIP
ENSG00000089682	-0.010947	0.95768	0.99842	226.16	273.418	253.732	160.142	225.064	274.53	RBM41
ENSG00000089685	-0.131384	0.371274	0.914544	2054.08	2215.21	2619.44	2889.14	2611.27	2879.41	BIRC5
ENSG00000089693	0.0241673	0.854846	0.988043	1691.23	1542.11	1599.25	1771.44	1492.03	1389.75	MLF2
ENSG00000089723	0.117595	0.60476	0.966212	93.1978	90.559	100.019	88.8461	90.3732	81.9089	OTUB2
ENSG00000089737	-0.0133294	0.904917	0.99377	3990.11	4062.96	4308.18	4241.58	3860.85	3967.63	DDX24
ENSG00000089775	0.125749	0.615418	0.966212	83.2567	82.7221	116.864	74.5868	76.4697	95.4104	ZBTB25
ENSG00000089818	-0.0728835	0.675468	0.969428	202.55	213.336	188.457	194.145	182.484	194.421	NECAP1
ENSG00000089820	0.0276838	0.854396	0.98797	6102.59	5759.2	7305.59	7388.49	5464.11	5367.28	ARHGAP4
ENSG00000089847	-0.168477	0.576546	0.966005	57.1613	56.5994	49.483	60.3276	38.2348	45.0049	ANKRD24
ENSG00000089876	0.15768	0.382387	0.917608	213.734	229.01	216.883	197.436	281.547	213.323	DHX32
ENSG00000089902	-0.17851	0.13559	0.775797	2609.54	3207.01	2466.78	2693.9	2663.4	2856.91	RCOR1
ENSG00000089916	-0.269521	0.0282937	0.499569	1939.76	2619.24	2034.07	2153.15	1899.58	2305.15	GPATCH2L
ENSG00000090006	-0.184037	0.190633	0.832139	849.964	958.706	848.581	1102.35	835.084	819.089	LTBP4
ENSG00000090013	0.18079	0.252223	0.872547	488.356	426.672	444.294	440.94	427.535	332.136	BLVRB
ENSG00000090020	0.0115389	0.935926	0.996336	904.64	897.753	709.607	774.387	827.263	747.981	SLC9A1
ENSG00000090054	-0.0770167	0.538575	0.957544	1651.46	1817.27	1491.86	1504.9	1605.86	1684.98	SPTLC1
ENSG00000090060	-0.0750183	0.581404	0.966005	6650.59	7148.93	5375.75	5542.46	6408.68	6724.63	PAPOLA
ENSG00000090061	-0.266235	0.0869313	0.690544	744.339	902.977	594.849	726.125	795.98	937.902	CCNK
ENSG00000090097	0.136578	0.35898	0.911676	591.495	529.422	680.128	662.507	603.068	515.756	PCBP4
ENSG00000090104	-0.948878	0.0076452	0.316485	24.8527	58.3409	22.1094	50.4558	27.8072	36.0039	RGS1
ENSG00000090238	-0.264876	0.125914	0.76431	206.278	249.037	218.989	309.316	249.395	255.628	YPEL3
ENSG00000090263	0.261238	0.0694246	0.654071	550.488	422.318	454.823	414.615	484.887	405.044	MRPS33
ENSG00000090266	0.261875	0.0450257	0.568973	856.177	666.131	790.675	666.894	730.807	648.071	NDUFB2
ENSG00000090273	0.04775	0.668936	0.969372	3485.6	3168.69	3167.97	3278.53	3204.77	3089.14	NUDC
ENSG00000090316	-0.038067	0.755718	0.978248	1632.82	1702.33	1799.29	1871.25	1617.16	1612.08	MAEA
ENSG00000090339	-0.445708	0.0512764	0.591848	146.631	188.955	104.23	168.917	103.408	122.413	ICAM1
ENSG00000090372	-0.14572	0.251984	0.872547	3114.05	3173.05	2992.14	3660.24	2720.76	2931.62	STRN4
ENSG00000090376	-0.135328	0.254578	0.872547	2193.25	2766.4	2408.87	2401.04	2336.67	2453.67	IRAK3
ENSG00000090382	0.17161	0.29401	0.888764	7655.89	6739.68	5580	4690.2	7348.91	6843.44	LYZ
ENSG00000090432	0.0544315	0.700928	0.972358	1045.06	950.869	853.845	870.911	828.132	801.087	MUL1
ENSG00000090447	0.468618	0.00807918	0.322148	417.526	341.338	541.155	267.635	384.955	360.039	TFAP4
ENSG00000090470	0.0760305	0.55069	0.959494	1062.45	926.488	1059.15	980.598	912.422	969.405	PDCD7
ENSG00000090487	0.0822246	0.507784	0.949967	1707.38	1667.5	1598.2	1412.76	1532	1486.06	SPG21
ENSG00000090520	0.120895	0.354245	0.909137	2107.51	1844.27	1702.43	1600.33	1777.92	1690.38	DNAJB11
ENSG00000090530	-0.161691	0.744799	NA	16.1543	13.0614	10.5283	23.0342	22.5933	19.8022	P3H2
ENSG00000090554	-0.562502	0.217298	NA	29.8233	21.769	14.7396	25.2279	12.1656	35.1038	FLT3LG
ENSG00000090565	0.094147	0.625198	0.967532	490.842	425.801	611.694	667.991	484.018	395.143	RAB11FIP3
ENSG00000090581	-0.0329631	0.814984	0.98514	831.324	782.813	917.015	1021.18	837.69	844.292	GNPTG
ENSG00000090612	0.043975	0.778074	0.980985	731.913	693.995	620.117	538.561	708.213	763.283	ZNF268
ENSG00000090615	0.0743071	0.529247	0.956004	1816.74	1765.03	1670.84	1567.42	1777.92	1666.98	GOLGA3
ENSG00000090621	0.0141818	0.894668	0.992553	21964.8	21785.5	20975.5	20797.7	20270.5	20007.4	PABPC4
ENSG00000090659	-0.0434828	0.920441	0.994292	1356.96	1480.29	686.445	710.769	872.449	812.788	CD209
ENSG00000090661	0.206097	0.274811	0.881208	198.822	180.247	189.509	177.692	182.484	136.815	CERS4
ENSG00000090674	-0.134756	0.358245	0.910969	482.143	553.803	582.215	540.755	450.128	567.062	MCOLN1
ENSG00000090686	0.0832367	0.489988	0.945198	1983.25	1846.88	1831.92	1693.56	2021.23	1967.61	USP48
ENSG00000090776	-0.0669781	0.698682	0.972338	349.181	350.916	452.717	490.299	363.231	381.642	EFNB1
ENSG00000090857	-0.180982	0.183748	0.82872	790.317	1037.95	947.547	1096.87	994.106	966.705	PDPR
ENSG00000090861	0.0577495	0.620321	0.966212	7038.29	6501.96	6931.83	6540.61	7506.19	7591.43	AARS
ENSG00000090863	-0.157387	0.177842	0.822088	2408.23	2787.3	2675.24	3078.9	2722.49	2843.41	GLG1
ENSG00000090889	0.0217468	0.890645	0.991944	1098.49	1104.12	1404.48	1262.49	1470.3	1549.97	KIF4A
ENSG00000090905	-0.0684874	0.623626	0.967245	1100.98	1283.5	1338.15	1099.06	1041.9	1265.54	TNRC6A
ENSG00000090924	-0.0627482	0.609223	0.966212	2595.87	2801.23	2663.66	3089.87	2765.94	2494.17	PLEKHG2
ENSG00000090971	0.187823	0.383493	0.917608	223.675	212.465	355.856	297.251	226.802	199.822	NAT14
ENSG00000090975	0.2122	0.20484	0.843341	301.961	277.772	385.336	334.544	329.341	267.329	PITPNM2
ENSG00000090989	-0.0912593	0.483322	0.94489	1051.27	990.924	925.437	1027.76	1015.83	1168.33	EXOC1
ENSG00000091009	-0.00788565	0.961581	0.998855	726.943	631.301	529.573	517.72	586.557	700.276	RBM27
ENSG00000091039	-0.128115	0.407543	0.923518	2416.93	3007.6	2147.77	1934.87	2342.75	2603.08	OSBPL8
ENSG00000091073	-0.164343	0.286912	0.887832	339.24	338.725	279	365.256	323.258	351.038	DTX2
ENSG00000091106	0.224157	0.426121	0.930121	175.212	147.158	96.8603	72.3931	103.408	99.0108	NLRC4
ENSG00000091127	0.180695	0.258909	0.875282	366.578	387.488	412.709	301.638	361.493	315.934	PUS7
ENSG00000091129	0.09788	0.764596	0.97836	55.9187	65.307	78.9622	32.906	72.1248	94.5103	NRCAM
ENSG00000091136	0.005982	0.97947	0.998855	82.014	101.008	92.649	92.1367	119.049	100.811	LAMB1
ENSG00000091140	0.0158632	0.896079	0.992553	2769.84	2783.82	2482.57	2507.43	2938.87	2810.11	DLD
ENSG00000091157	0.215331	0.240966	0.864153	397.644	399.679	401.128	242.407	353.672	347.438	WDR7
ENSG00000091164	0.0528051	0.706615	0.974217	1353.23	1236.48	1256.03	1162.68	1465.09	1528.37	TXNL1
ENSG00000091262	-0.249188	0.182371	0.82872	190.123	226.397	212.672	309.316	257.216	252.928	ABCC6
ENSG00000091317	-0.215266	0.08312	0.684017	3782.59	4242.34	3046.89	3776.51	3458.51	3921.73	CMTM6
ENSG00000091409	-0.545988	0.200298	0.841609	503.268	785.425	257.943	432.165	336.293	383.442	ITGA6
ENSG00000091428	0.264785	0.576863	NA	24.8527	9.57835	16.8453	20.8404	26.9382	27.0029	RAPGEF4
ENSG00000091436	0.0688402	0.60056	0.966212	941.919	836.8	866.479	840.199	974.119	975.706	MAP3K20
ENSG00000091483	0.0462099	0.702218	0.972358	1483.71	1419.34	1307.61	1344.76	1405.13	1298.84	FH
ENSG00000091490	-0.0431633	0.784299	0.981751	2833.21	2954.49	3653.32	4143.96	3993.8	3705.7	SEL1L3
ENSG00000091513	-0.0721994	0.842462	0.987024	34.7938	39.1842	31.5849	27.4216	26.9382	30.6033	TF
ENSG00000091527	-0.0172751	0.902007	0.993741	5837.91	5793.16	4570.33	4412.69	4920.13	5302.48	CDV3
ENSG00000091536	0.0137882	0.977061	NA	21.1248	14.8029	12.634	26.3248	22.5933	15.3017	MYO15A
ENSG00000091542	0.168355	0.201248	0.842514	990.382	833.317	1126.53	964.145	979.333	958.604	ALKBH5
ENSG00000091592	-0.29992	0.14809	0.797981	108.109	139.321	110.547	152.464	145.119	158.417	NLRP1
ENSG00000091640	0.100113	0.47728	0.941755	540.547	473.693	548.524	491.396	463.163	481.552	SPAG7
ENSG00000091651	-0.0279646	0.830117	0.987024	871.088	812.418	920.173	932.336	805.538	902.798	ORC6
ENSG00000091732	0.00731525	0.956319	0.998335	538.062	576.443	604.324	593.404	598.723	564.361	ZC3HC1
ENSG00000091844	-0.126668	0.78903	NA	23.6101	16.5444	16.8453	14.2593	16.5105	30.6033	RGS17
ENSG00000091947	0.285054	0.0618144	0.628899	689.663	574.701	893.853	731.609	742.103	604.866	TMEM101
ENSG00000092010	-0.0682587	0.570611	0.96546	2464.15	2432.03	2205.68	2695	2426.17	2314.15	PSME1
ENSG00000092020	-0.179684	0.193034	0.834262	1333.35	1460.26	1022.3	1355.73	1328.66	1356.45	PPP2R3C
ENSG00000092036	-0.0163306	0.902767	0.993741	695.877	712.281	807.521	816.068	787.29	791.186	HAUS4
ENSG00000092067	-0.200486	0.558128	0.96179	29.8233	43.538	42.1132	46.0683	33.021	31.5034	CEBPE
ENSG00000092094	0.0124261	0.918231	0.994292	1088.55	1078	1052.83	1057.38	1015.83	993.708	OSGEP
ENSG00000092098	0.0462763	0.739021	0.976633	1103.46	1040.56	1176.01	1136.35	938.491	938.802	RNF31
ENSG00000092108	0.0649023	0.696904	0.971805	786.589	808.935	660.124	548.433	813.359	801.087	SCFD1
ENSG00000092140	-0.0112494	0.941462	0.997043	703.332	719.247	656.966	578.048	745.579	823.59	G2E3
ENSG00000092148	-0.0570483	0.677427	0.969428	3720.45	4544.49	3674.38	3309.24	3541.07	3520.28	HECTD1
ENSG00000092199	0.139778	0.188131	0.830302	13979.7	12076.6	12821.4	12437.4	13854	12387.1	HNRNPC
ENSG00000092201	-0.0168726	0.872999	0.988916	7508.01	7815.94	7440.35	7352.29	7323.71	7364.6	SUPT16H
ENSG00000092203	-0.102523	0.395875	0.921543	1701.17	1751.1	1525.55	1828.47	1598.04	1600.37	TOX4
ENSG00000092208	0.537471	0.00166149	0.155802	296.99	183.73	277.947	178.789	280.678	225.925	GEMIN2
ENSG00000092295	-0.839125	0.0169971	0.4202	19.8822	52.2456	34.7434	47.1652	24.3313	42.3046	TGM1
ENSG00000092330	-0.216851	0.126072	0.764374	825.111	942.162	825.419	1012.41	713.427	792.086	TINF2
ENSG00000092421	-0.543859	0.00214858	0.1849	164.028	222.914	148.449	253.376	164.236	219.624	SEMA6A
ENSG00000092439	0.149172	0.309062	0.893069	1631.58	1759.8	1727.69	1205.46	1687.55	1583.27	TRPM7
ENSG00000092445	0.13161	0.446376	0.935911	218.704	190.696	216.883	224.857	223.326	187.22	TYRO3
ENSG00000092470	-0.152104	0.213802	0.848284	950.617	1008.34	870.69	1039.83	961.954	1045.01	WDR76
ENSG00000092531	-0.0475718	0.735116	0.976633	1303.53	1280.89	992.819	1182.42	1317.36	1270.94	SNAP23
ENSG00000092607	-0.281096	0.152548	0.799933	361.607	406.645	209.513	333.447	299.796	315.934	TBX15
ENSG00000092621	0.229575	0.0543216	0.605916	6415.73	4948.53	5531.57	4904.09	6184.48	5610.31	PHGDH
ENSG00000092758	-0.0222541	0.968417	0.998855	65.8598	89.6882	212.672	198.533	131.215	128.714	COL9A3
ENSG00000092820	-0.198537	0.124879	0.762797	4846.28	5437.02	5178.87	6490.15	5988.97	6454.6	EZR
ENSG00000092841	0.070564	0.567757	0.96546	17536.1	15050.2	17466.4	18248.6	15669.3	14955.1	MYL6
ENSG00000092847	-0.00225179	0.986402	0.998855	1030.15	1086.71	948.6	896.139	935.884	933.402	AGO1
ENSG00000092853	-0.170994	0.153411	0.799933	1530.93	1751.1	1488.7	1561.94	1536.35	1814.6	CLSPN
ENSG00000092871	-0.196637	0.18759	0.830302	422.497	475.435	359.015	482.621	463.163	469.851	RFFL
ENSG00000092929	-0.0371216	0.807939	0.984032	1004.05	993.536	1262.34	1388.63	1126.19	1102.62	UNC13D
ENSG00000092931	-0.423967	0.00324518	0.222852	434.923	579.926	374.807	515.527	391.038	513.056	MFSD11
ENSG00000092964	-0.136929	0.401253	0.921773	1948.45	2216.95	1392.89	1583.87	1951.71	2017.12	DPYSL2
ENSG00000092969	-0.456891	0.414265	NA	6.21318	13.9321	12.634	14.2593	13.0346	16.2018	TGFB2
ENSG00000092978	0.0313374	0.848882	0.9875	612.62	582.538	488.513	433.262	570.916	617.467	GPATCH2
ENSG00000093000	-0.053332	0.662278	0.96914	3220.91	3424.7	3274.3	2906.69	2993.61	3511.28	NUP50
ENSG00000093009	-0.167324	0.251085	0.872547	909.61	1039.69	1100.21	1357.92	1084.48	1081.92	CDC45
ENSG00000093010	0.0393936	0.746499	0.976633	5932.35	5441.38	6210.64	6776.43	6423.45	5852.44	COMT
ENSG00000093072	-0.0784953	0.62508	0.967532	260.954	331.759	304.268	277.507	295.451	299.733	ADA2
ENSG00000093144	0.18945	0.152694	0.799933	2237.99	1908.7	1868.77	1668.33	2274.1	2017.12	ECHDC1
ENSG00000093167	-0.0608225	0.669585	0.969372	954.345	995.278	829.63	785.356	904.601	1020.71	LRRFIP2
ENSG00000093183	-0.0484013	0.709766	0.975149	948.132	1002.24	919.12	881.88	826.394	898.298	SEC22C
ENSG00000093217	0.490675	0.0333844	0.526307	154.087	137.58	286.37	133.818	179.878	170.119	XYLB
ENSG00000094631	-0.222472	0.0951168	0.708971	1036.36	1183.36	1159.17	1476.38	1152.26	1250.24	HDAC6
ENSG00000094804	-0.215568	0.082059	0.680725	1356.96	1580.43	1397.11	1717.69	1315.63	1428.46	CDC6
ENSG00000094841	-0.034762	0.841012	0.987024	420.011	422.318	319.007	304.929	372.79	408.644	UPRT
ENSG00000094880	-0.0928805	0.452003	0.93829	1169.32	1313.98	1383.42	1369.98	1226.99	1348.35	CDC23
ENSG00000094914	0.120501	0.343121	0.907505	890.971	872.501	1051.78	892.848	966.299	911.799	AAAS
ENSG00000094916	0.00456054	0.971577	0.998855	5394.29	6011.72	7140.29	6244.45	6135.82	6357.39	CBX5
ENSG00000094975	0.0521585	0.700771	0.972358	597.708	621.722	592.743	531.98	631.744	603.066	SUCO
ENSG00000095002	0.0944653	0.517709	0.952027	1519.74	1533.41	1441.32	1128.67	1579.79	1588.67	MSH2
ENSG00000095015	-0.0276842	0.835244	0.987024	1801.82	2203.02	2047.75	1700.14	1977.78	2036.02	MAP3K1
ENSG00000095059	0.0113052	0.926584	0.99557	1329.62	1274.79	1389.74	1480.77	1355.6	1289.84	DHPS
ENSG00000095066	-0.162645	0.38275	0.917608	219.947	249.908	321.113	333.447	273.727	331.236	HOOK2
ENSG00000095139	-0.070183	0.539933	0.958	7658.37	8104.16	6986.58	6999.1	7059.54	7679.64	ARCN1
ENSG00000095203	-0.20652	0.690585	NA	12.4264	13.9321	11.5811	13.1624	21.7243	26.1028	EPB41L4B
ENSG00000095209	0.335104	0.0212852	0.45034	717.001	557.286	625.381	459.587	684.751	587.764	TMEM38B
ENSG00000095261	0.100331	0.524891	0.955414	333.027	275.16	317.955	307.122	342.376	344.738	PSMD5
ENSG00000095303	-0.088438	0.477189	0.941755	1127.07	1205.13	1012.82	1176.94	1109.68	1072.92	PTGS1
ENSG00000095319	0.00742111	0.951335	0.997043	2334.91	2347.57	2621.55	2509.63	2201.98	2264.65	NUP188
ENSG00000095321	-0.270855	0.055449	0.610267	556.701	647.845	570.634	779.871	566.571	618.367	CRAT
ENSG00000095370	-0.574846	0.0107819	0.348927	88.2272	133.226	98.966	151.367	78.2076	110.712	SH2D3C
ENSG00000095380	0.113623	0.40287	0.922963	1204.12	1079.74	959.128	935.626	1067.1	967.605	NANS
ENSG00000095383	-0.253787	0.0855179	0.68897	383.975	422.318	326.377	428.874	384.086	453.649	TBC1D2
ENSG00000095397	0.0362792	0.906743	0.99377	36.0365	56.5994	64.2226	50.4558	53.0074	43.2047	WHRN
ENSG00000095485	-0.089001	0.490556	0.945198	666.053	716.635	679.075	677.863	687.358	766.883	CWF19L1
ENSG00000095539	-0.234071	0.542767	0.958318	22.3675	26.9935	29.4792	26.3248	27.8072	40.5044	SEMA4G
ENSG00000095564	-0.372525	0.0195803	0.439908	2060.29	3255.77	2201.47	2042.36	1870.9	2637.29	BTAF1
ENSG00000095574	-0.0486592	0.741798	0.976633	407.585	434.509	383.23	379.515	431.88	450.049	IKZF5
ENSG00000095585	0.280091	0.461875	0.939682	32.3086	23.5105	26.3207	23.0342	38.2348	33.3036	BLNK
ENSG00000095637	-0.153393	0.753579	NA	13.669	20.0275	17.8981	14.2593	14.7725	17.1019	SORBS1
ENSG00000095739	-0.315593	0.392434	0.921543	23.6101	43.538	28.4264	27.4216	33.021	35.1038	BAMBI
ENSG00000095787	-0.128683	0.268969	0.880876	4700.9	5031.25	4132.36	4444.5	4249.28	4823.62	WAC
ENSG00000095794	-0.0765814	0.679118	0.969955	226.16	292.575	226.358	193.048	238.968	242.126	CREM
ENSG00000095906	0.240558	0.109885	0.738358	1304.77	1078	1568.72	1373.28	1234.81	1027.91	NUBP2
ENSG00000095951	-0.336241	0.0344333	0.533245	263.439	388.359	279	341.125	282.416	312.334	HIVEP1
ENSG00000095970	0.487733	0.000287026	0.0629466	1268.73	840.283	1382.37	946.595	1370.37	1081.92	TREM2
ENSG00000096060	-0.032316	0.823512	0.98599	879.787	991.795	1136	1095.77	1170.51	1174.63	FKBP5
ENSG00000096063	0.272093	0.0319357	0.517263	2108.75	1915.67	2539.43	1837.25	2453.11	2128.73	SRPK1
ENSG00000096070	-0.173909	0.160955	0.805055	1733.48	1999.26	1771.91	1816.41	1498.11	1825.4	BRPF3
ENSG00000096080	0.0258222	0.839252	0.987024	970.499	940.42	922.279	971.823	906.339	837.091	MRPS18A
ENSG00000096092	0.023919	0.877738	0.988923	295.748	314.344	313.743	289.572	341.507	332.136	TMEM14A
ENSG00000096093	-0.177831	0.309205	0.893069	207.52	260.357	242.151	263.248	281.547	306.033	EFHC1
ENSG00000096384	-0.0442842	0.693114	0.971196	43412.8	43636.4	37956.6	39590.3	39083	40977	HSP90AB1
ENSG00000096401	-0.0873596	0.478953	0.942859	3038.25	3187.85	2678.4	2686.22	2649.5	3009.93	CDC5L
ENSG00000096433	0.0804401	0.653117	0.96914	449.835	440.604	644.332	599.985	470.984	441.948	ITPR3
ENSG00000096654	0.0334896	0.856296	0.988096	191.366	154.124	176.875	180.983	164.236	184.52	ZNF184
ENSG00000096717	-0.267887	0.0492545	0.588973	684.693	872.501	616.958	717.35	675.192	788.486	SIRT1
ENSG00000096746	-0.026392	0.826254	0.986528	2904.04	2925.75	2900.55	2931.92	3243.88	3359.17	HNRNPH3
ENSG00000096872	-0.0908921	0.643892	0.967532	217.461	226.397	184.245	178.789	238.099	275.43	IFT74
ENSG00000096968	-0.132834	0.314436	0.896408	1062.45	1293.95	1063.36	1018.99	1025.39	1139.52	JAK2
ENSG00000096996	-0.0381255	0.855973	0.988096	134.205	149.771	149.502	149.174	118.18	113.412	IL12RB1
ENSG00000097007	0.0927068	0.453648	0.939178	2383.38	2168.19	2536.27	2376.91	2135.94	2071.13	ABL1
ENSG00000097021	-0.0334411	0.820263	0.985885	709.546	698.349	753.826	910.398	775.124	685.875	ACOT7
ENSG00000097033	-0.00180883	0.989138	0.998903	2041.65	2010.58	1683.47	1651.88	1911.74	1978.42	SH3GLB1
ENSG00000097046	-0.0672046	0.597746	0.966212	1053.76	1080.61	1112.84	1123.19	1156.6	1279.04	CDC7
ENSG00000097096	0.00439556	0.989884	0.998903	41.007	32.2181	57.9056	38.3903	43.4487	71.1077	SYDE2
ENSG00000099194	-0.147726	0.306718	0.893035	9979.62	10864.5	8536.34	11181.4	12528.9	12349.3	SCD
ENSG00000099203	0.0594243	0.74848	0.976753	208.763	219.431	281.106	288.476	296.32	250.227	TMED1
ENSG00000099219	0.102469	0.407421	0.923518	1789.4	1851.23	1806.66	1514.77	1871.77	1725.49	ERMP1
ENSG00000099246	0.0428618	0.7779	0.980985	1648.98	1530.79	1329.72	1206.55	1610.21	1714.69	RAB18
ENSG00000099250	-0.0656767	0.875674	0.988923	1527.2	1675.34	808.573	765.612	1340.83	1405.95	NRP1
ENSG00000099251	0.190246	0.569819	0.96546	52.1907	37.4427	30.5321	34.0028	49.5315	44.1048	HSD17B7P2
ENSG00000099256	-0.0872116	0.80818	0.984032	29.8233	32.2181	47.3773	71.2963	69.5179	54.906	PRTFDC1
ENSG00000099282	-0.184121	0.330211	0.90394	349.181	380.522	258.996	338.931	255.478	259.228	TSPAN15
ENSG00000099284	0.116299	0.525456	0.955674	255.983	249.037	371.649	323.575	343.245	325.835	H2AFY2
ENSG00000099290	-0.0847964	0.510291	0.950818	999.08	1110.22	940.177	937.82	1021.91	1090.92	WASHC2A
ENSG00000099308	-0.123405	0.371036	0.914544	464.746	552.932	526.415	546.239	545.715	576.963	MAST3
ENSG00000099326	-0.0700396	0.667789	0.96914	277.108	335.242	377.966	329.06	320.651	360.939	MZF1
ENSG00000099330	-0.277528	0.0868477	0.690544	243.557	309.12	284.264	345.513	250.264	289.832	OCEL1
ENSG00000099331	0.0046712	0.970787	0.998855	5058.77	4925.89	5216.77	5504.07	4538.65	4336.67	MYO9B
ENSG00000099337	0.0178563	0.895395	0.992553	646.171	638.267	723.294	703.091	620.447	624.668	KCNK6
ENSG00000099338	0.312943	0.473249	0.940481	32.3086	40.9257	34.7434	10.9687	27.8072	23.4025	CATSPERG
ENSG00000099341	0.0225653	0.862219	0.988656	2819.54	2546.1	3092.16	3175.43	2627.78	2686.79	PSMD8
ENSG00000099364	0.242203	0.122569	0.761981	1873.9	1386.25	2176.2	1856.99	1539.82	1483.36	FBXL19
ENSG00000099365	-0.387176	0.36352	NA	18.6396	26.9935	16.8453	20.8404	21.7243	27.0029	STX1B
ENSG00000099377	0.162598	0.620737	0.966212	58.4039	31.3473	37.9019	57.037	50.4005	43.2047	HSD3B7
ENSG00000099381	-0.262104	0.0935093	0.705818	1670.1	1892.16	1755.07	2368.13	1437.28	1571.57	SETD1A
ENSG00000099385	0.133612	0.412816	0.92399	611.377	463.244	621.17	649.344	516.17	482.452	BCL7C
ENSG00000099399	0.302837	0.243219	0.866017	142.903	114.94	253.732	190.855	267.644	234.926	MAGEB2
ENSG00000099622	-0.566579	0.000294588	0.0635796	3172.45	4431.29	3299.57	5954.88	3061.39	3735.41	CIRBP
ENSG00000099624	0.0699185	0.573566	0.96546	1726.02	1549.95	1596.09	1771.44	1713.62	1477.96	ATP5F1D
ENSG00000099625	0.155414	0.649098	0.967532	36.0365	30.4766	66.3283	68.0057	64.304	53.1058	CBARP
ENSG00000099725	0.229114	0.385521	0.918085	65.8598	74.0145	87.3849	51.5527	80.8145	73.808	PRKY
ENSG00000099783	-0.0234925	0.82787	0.986724	11479.5	11550.6	10792.6	11273.6	10623.2	10609.5	HNRNPM
ENSG00000099785	-0.00398175	0.979776	0.998855	493.327	481.53	408.498	433.262	396.252	384.342	2002-03-01
ENSG00000099795	0.156214	0.318733	0.899343	1247.61	1016.18	1263.4	1344.76	1114.02	893.797	NDUFB7
ENSG00000099797	0.029236	0.806209	0.984032	3452.05	3116.45	3280.62	3696.44	3641.87	3356.47	TECR
ENSG00000099800	0.225913	0.0771475	0.667712	1886.32	1590.88	1905.62	1616.78	1608.47	1408.65	TIMM13
ENSG00000099804	0.149947	0.217859	0.852631	996.595	899.494	1041.25	949.885	988.023	878.496	CDC34
ENSG00000099812	0.687088	0.338902	NA	12.4264	8.70759	4.21132	2.19373	19.9864	11.7013	MISP
ENSG00000099814	0.0658257	0.689045	0.971196	889.728	792.391	1025.46	1029.96	751.662	726.379	CEP170B
ENSG00000099817	0.0523166	0.678824	0.969841	5161.91	4714.29	4992.52	5167.33	4417.86	4171.05	POLR2E
ENSG00000099821	0.340554	0.0173073	0.426319	2110	1703.21	2504.68	1876.74	1850.04	1525.67	POLRMT
ENSG00000099822	-0.00312307	0.9862	0.998855	377.762	357.011	385.336	489.202	538.764	462.65	HCN2
ENSG00000099840	0.0562849	0.839754	0.987024	54.676	55.7286	73.6981	72.3931	59.0902	53.1058	IZUMO4
ENSG00000099849	0.162951	0.377572	0.914819	467.231	423.189	655.913	556.111	428.404	407.744	RASSF7
ENSG00000099860	0.0347698	0.823367	0.98599	461.018	449.312	553.789	496.88	408.418	442.848	GADD45B
ENSG00000099864	-0.092694	0.557552	0.961694	406.342	424.06	353.751	461.78	397.99	350.138	PALM
ENSG00000099866	0.062581	0.913361	NA	18.6396	13.9321	10.5283	9.87179	8.68974	11.7013	MADCAM1
ENSG00000099875	0.059975	0.645965	0.967532	3934.19	3611.91	4031.29	4014.53	3349.02	3226.85	MKNK2
ENSG00000099889	0.134239	0.686349	0.971196	48.4628	40.0549	49.483	53.7464	37.3659	29.7032	ARVCF
ENSG00000099899	0.328518	0.0174577	0.426605	2462.91	1987.07	3010.04	2235.41	2249.77	1928.01	TRMT2A
ENSG00000099901	0.0317459	0.785013	0.981772	3545.24	3303.66	3762.81	3817.09	3455.04	3409.57	RANBP1
ENSG00000099904	0.114413	0.456597	0.939178	704.575	675.709	854.898	718.447	610.888	610.266	ZDHHC8
ENSG00000099910	0.196519	0.229081	0.85769	314.387	296.929	404.287	360.869	393.645	315.934	KLHL22
ENSG00000099917	-0.212113	0.0669153	0.647064	2310.06	2711.54	2538.37	2960.44	2341.88	2658.89	MED15
ENSG00000099940	-0.0512758	0.695792	0.971306	1631.58	1609.16	1344.46	1385.34	1369.5	1504.06	SNAP29
ENSG00000099942	-0.0521792	0.685674	0.971196	3162.51	3695.5	4047.08	3732.63	3278.64	3447.38	CRKL
ENSG00000099949	0.330553	0.0417225	0.559148	1215.3	1132.86	1668.74	1094.67	1099.25	939.702	LZTR1
ENSG00000099954	0.318407	0.313522	0.896291	93.1978	56.5994	67.3811	35.0997	57.3523	81.0088	CECR2
ENSG00000099956	-0.124532	0.340955	0.907505	2616.99	2643.63	2540.48	3058.06	2272.37	2397.86	SMARCB1
ENSG00000099958	0.393231	0.12615	0.764374	86.9846	70.5315	153.713	110.783	135.56	107.112	DERL3
ENSG00000099968	0.12241	0.30006	0.890986	1873.9	1800.73	1829.82	1557.55	1833.53	1726.39	BCL2L13
ENSG00000099974	-0.0837114	0.791079	0.982669	36.0365	51.3748	66.3283	55.9401	41.7107	45.905	DDTL
ENSG00000099977	0.050002	0.74409	0.976633	426.224	424.06	415.868	480.427	522.253	416.745	DDT
ENSG00000099985	-0.113378	0.730586	0.976633	47.2202	53.9871	41.0604	81.168	71.2558	39.6043	OSM
ENSG00000099991	-0.0297917	0.861811	0.988562	1655.19	1652.7	2147.77	2577.63	2023.84	1722.79	CABIN1
ENSG00000099992	0.0934359	0.688242	0.971196	101.896	94.042	138.974	143.689	119.049	101.711	TBC1D10A
ENSG00000099995	-0.126495	0.281396	0.886617	4694.68	5120.94	4053.39	4603.54	4352.69	4574.3	SF3A1
ENSG00000099998	-0.429939	0.292302	NA	23.6101	26.1228	15.7924	31.8091	23.4623	27.0029	GGT5
ENSG00000099999	-0.0457709	0.785786	0.981962	288.292	316.086	307.426	326.866	267.644	248.427	RNF215
ENSG00000100003	-0.118426	0.726036	0.976633	27.338	45.2795	38.9547	35.0997	45.1866	41.4045	SEC14L2
ENSG00000100014	0.132632	0.353891	0.909137	539.304	499.816	514.834	454.102	467.508	432.047	SPECC1L
ENSG00000100023	-0.0284263	0.838173	0.987024	1289.86	1371.45	1628.73	1546.58	1261.75	1346.55	PPIL2
ENSG00000100027	-0.447153	0.383287	NA	9.94109	15.6737	10.5283	18.6467	24.3313	27.903	YPEL1
ENSG00000100028	0.0592995	0.60074	0.966212	2456.69	2224.79	2527.84	2480.01	2422.7	2405.06	SNRPD3
ENSG00000100029	0.201375	0.0906389	0.698824	3679.45	3085.97	3554.35	3236.85	3247.35	2792.1	PES1
ENSG00000100030	-0.0118128	0.919611	0.994292	3278.08	3478.68	3079.53	2990.06	3361.19	3328.56	MAPK1
ENSG00000100031	0.0667273	0.628099	0.967532	1134.53	1074.52	1322.35	1340.37	1195.71	1075.62	GGT1
ENSG00000100034	0.101813	0.437939	0.934958	2018.04	1902.61	2055.12	1986.42	1800.51	1584.17	PPM1F
ENSG00000100036	0.506965	0.167499	0.811164	48.4628	31.3473	25.2679	27.4216	49.5315	27.903	SLC35E4
ENSG00000100038	-0.182484	0.561482	0.963283	52.1907	45.2795	36.849	43.8746	37.3659	53.1058	TOP3B
ENSG00000100055	-0.334677	0.0284254	0.5	4724.51	5170.57	4548.23	7311.7	4436.11	4808.32	CYTH4
ENSG00000100056	-0.0851773	0.519108	0.952539	717.001	733.179	742.245	757.934	630.006	723.679	ESS2
ENSG00000100058	-0.00291123	0.986572	0.998855	269.652	255.132	310.585	356.481	324.996	298.833	CRYBB2P1
ENSG00000100060	0.174042	0.285637	0.887832	771.677	692.254	967.551	874.202	729.938	623.768	MFNG
ENSG00000100065	-0.210291	0.318889	0.899572	121.778	157.607	171.611	205.114	143.381	144.916	CARD10
ENSG00000100068	-0.210422	0.531986	0.956004	24.8527	48.7625	41.0604	47.1652	51.2694	41.4045	LRP5L
ENSG00000100075	0.0316716	0.810269	0.984111	4478.46	4033.36	4190.26	4936.99	5245.12	4645.41	SLC25A1
ENSG00000100077	0.366329	0.0430027	0.564508	213.734	198.533	294.792	179.886	249.395	209.723	GRK3
ENSG00000100083	-0.00932804	0.948233	0.997043	1081.09	1112.83	1268.66	1354.63	1105.33	1012.61	GGA1
ENSG00000100084	0.223311	0.0918147	0.700957	726.943	562.511	639.068	598.889	663.027	576.063	HIRA
ENSG00000100092	-0.329909	0.0207663	0.447325	2513.85	2797.75	2325.7	3541.78	2207.19	2518.47	SH3BP1
ENSG00000100097	0.0798783	0.608538	0.966212	14373.6	11710	17044.3	18506.3	15589.4	14263	LGALS1
ENSG00000100099	0.00851875	0.947928	0.997043	700.847	717.506	800.151	795.227	773.386	750.682	HPS4
ENSG00000100100	0.30174	0.369292	0.914544	33.5512	32.2181	50.5358	40.584	43.4487	31.5034	PIK3IP1
ENSG00000100104	0.110105	0.488708	0.94489	607.649	525.939	443.241	445.327	488.363	451.849	SRRD
ENSG00000100105	-0.0470885	0.753963	0.978248	1169.32	1172.91	1328.67	1512.58	1134.88	1070.22	PATZ1
ENSG00000100106	-0.137069	0.290915	0.887832	2379.65	2527.81	2674.19	3176.52	2486.13	2590.48	TRIOBP
ENSG00000100109	-0.0309411	0.801188	0.983102	1266.25	1226.03	1181.28	1263.59	1114.89	1148.52	TFIP11
ENSG00000100116	0.235314	0.196937	0.838368	238.586	186.343	249.521	262.151	267.644	196.221	GCAT
ENSG00000100122	0.273387	0.345419	0.907505	45.9776	48.7625	72.6453	60.3276	71.2558	49.5054	CRYBB1
ENSG00000100124	0.230053	0.0972186	0.711071	801.501	652.199	948.6	768.903	806.407	759.683	ANKRD54
ENSG00000100129	-0.140207	0.284817	0.887832	4464.79	4619.38	3393.27	4391.85	4012.05	4068.44	EIF3L
ENSG00000100138	0.231625	0.0572899	0.616762	2613.27	2158.61	2372.03	2081.85	2231.52	1903.71	SNU13
ENSG00000100139	-0.0948418	0.465225	0.939682	1306.01	1262.6	1274.98	1513.67	1187.02	1248.44	MICALL1
ENSG00000100147	0.318328	0.259208	0.875636	82.014	69.6607	157.924	92.1367	78.2076	93.6102	CCDC134
ENSG00000100150	0.0210798	0.895808	0.992553	555.459	641.75	661.177	551.723	490.97	487.853	DEPDC5
ENSG00000100151	-0.176404	0.323877	0.900759	273.38	262.099	308.479	401.453	292.844	327.636	PICK1
ENSG00000100154	0.102457	0.549144	0.959433	239.829	280.385	331.641	262.151	282.416	253.828	TTC28
ENSG00000100156	0.171254	0.698629	0.972338	14.9116	17.4152	30.5321	38.3903	47.7935	28.8031	SLC16A8
ENSG00000100162	0.111436	0.48588	0.94489	552.973	464.986	674.864	664.7	612.626	576.963	CENPM
ENSG00000100167	0.291302	0.0722265	0.659686	406.342	306.507	324.272	270.926	324.996	282.631	2003-09-01
ENSG00000100181	0.788303	0.0606949	0.628367	26.0954	16.5444	28.4264	15.3561	45.1866	26.1028	TPTEP1
ENSG00000100196	-0.102411	0.60225	0.966212	145.389	138.451	164.241	190.855	158.153	174.619	KDELR3
ENSG00000100197	0.0387506	0.948978	NA	14.9116	8.70759	7.36981	13.1624	10.4277	9.90108	CYP2D6
ENSG00000100201	-0.181019	0.142243	0.785681	10943.9	13312.2	10825.2	10521.1	10757	13037.9	DDX17
ENSG00000100207	-0.0645684	0.605812	0.966212	1175.53	1280.02	1344.46	1328.3	1146.18	1225.93	TCF20
ENSG00000100209	-0.00639308	0.975779	0.998855	116.808	119.294	110.547	102.008	119.918	126.914	HSCB
ENSG00000100211	0.266516	0.13788	0.780454	243.557	171.54	220.041	199.63	257.216	228.625	CBY1
ENSG00000100216	-0.00347785	0.977549	0.998855	1747.15	1643.12	1570.82	1651.88	1475.52	1507.66	TOMM22
ENSG00000100219	0.0715012	0.622343	0.966504	4105.67	3652.84	2878.44	3040.51	3630.57	3405.07	XBP1
ENSG00000100220	0.0430468	0.71246	0.975149	2430.6	2220.44	2160.41	2209.09	2140.28	2101.73	RTCB
ENSG00000100221	-0.125934	0.300745	0.890986	925.764	975.25	925.437	1038.73	882.008	968.505	JOSD1
ENSG00000100225	-0.106836	0.359521	0.911676	2447.99	2518.24	2225.68	2679.64	2343.62	2359.16	FBXO7
ENSG00000100226	-0.150761	0.394019	0.921543	822.626	979.604	1208.65	1367.79	920.243	932.501	GTPBP1
ENSG00000100227	0.000919766	0.993536	0.999429	4103.19	4125.66	4132.36	3991.49	3687.92	3796.61	POLDIP3
ENSG00000100234	-0.409075	0.00432255	0.253292	30602.4	36705.1	22463.2	40212.2	28429.3	31294.6	TIMP3
ENSG00000100239	-0.0247442	0.866297	0.988729	1942.24	2019.29	2506.79	2589.7	2046.43	2001.82	PPP6R2
ENSG00000100241	0.0908223	0.524138	0.954938	3671.99	3229.65	3961.8	3952.01	3147.42	2942.42	SBF1
ENSG00000100242	-0.172446	0.199101	0.840884	5399.26	5947.29	5667.38	7049.55	5053.08	5171.06	SUN2
ENSG00000100243	-0.0433841	0.772965	0.979994	3571.34	3436.89	4248.17	4825.11	3574.09	3482.48	CYB5R3
ENSG00000100246	0.199471	0.279879	0.885048	248.527	216.819	307.426	311.51	315.437	234.025	DNAL4
ENSG00000100253	-0.0455795	0.92893	NA	13.669	19.1567	10.5283	14.2593	22.5933	15.3017	MIOX
ENSG00000100258	-0.0701673	0.620758	0.966212	1528.44	1657.93	1942.47	2040.17	1611.08	1639.98	LMF2
ENSG00000100263	0.224301	0.171888	0.814628	770.435	592.987	941.23	810.584	679.537	644.47	RHBDD3
ENSG00000100266	-0.054852	0.631377	0.967532	3322.81	3503.06	3285.88	3322.41	3004.04	3157.54	PACSIN2
ENSG00000100271	0.0269151	0.885308	0.99165	187.638	188.955	161.083	175.498	218.981	193.521	TTLL1
ENSG00000100276	-0.673064	0.255789	NA	4.97055	9.57835	8.42264	20.8404	18.2484	21.6024	RASL10A
ENSG00000100280	-0.00705205	0.957473	0.99842	2846.88	2721.12	3340.63	3443.06	2862.4	2932.52	AP1B1
ENSG00000100281	-0.243123	0.0470012	0.57816	1238.91	1506.41	1134.95	1403.99	1194.84	1312.34	HMGXB4
ENSG00000100284	-0.0359121	0.774857	0.980102	890.971	888.175	935.966	1016.79	953.264	947.803	TOM1
ENSG00000100285	0.151247	0.216412	0.850278	1688.74	1453.3	1831.92	1537.81	1549.38	1573.37	NEFH
ENSG00000100288	-0.380255	0.0646796	0.638488	115.565	177.635	184.245	187.564	141.643	210.623	CHKB
ENSG00000100290	-0.53861	0.0116511	0.360045	383.975	417.094	355.856	827.037	448.39	486.053	BIK
ENSG00000100292	-0.254211	0.49885	0.948546	2831.97	3304.53	2013.01	2812.36	4384.84	4892.03	HMOX1
ENSG00000100294	0.21488	0.150086	0.798692	673.509	561.64	772.777	709.672	663.027	548.16	MCAT
ENSG00000100296	0.00796727	0.950065	0.997043	736.884	774.105	822.26	796.324	830.739	808.288	THOC5
ENSG00000100297	-0.0984812	0.463892	0.939682	4848.77	5248.07	5834.78	6678.81	5403.28	5300.68	MCM5
ENSG00000100298	-0.254277	0.501414	0.949967	27.338	26.1228	23.1623	40.584	30.4141	30.6033	APOBEC3H
ENSG00000100299	-0.0554832	0.700404	0.972358	756.766	844.637	906.487	899.43	722.117	735.38	ARSA
ENSG00000100300	0.0806291	0.640258	0.967532	2991.03	2696.74	3791.24	4051.82	3017.94	2522.07	TSPO
ENSG00000100302	0.825558	0.157852	NA	19.8822	9.57835	9.47547	13.1624	19.9864	5.40059	RASD2
ENSG00000100304	0.23723	0.063031	0.630944	2881.67	2434.64	3159.54	2780.55	2739.87	2235.84	TTLL12
ENSG00000100307	0.111215	0.534249	0.95619	328.056	316.086	411.656	440.94	399.728	301.533	CBX7
ENSG00000100316	0.0178781	0.888657	0.991944	43775.6	40000.9	35418.2	40108	36452.6	34111	RPL3
ENSG00000100319	0.132877	0.421125	0.927876	359.122	318.698	372.702	329.06	286.761	279.93	ZMAT5
ENSG00000100320	-0.0531653	0.706598	0.974217	579.069	692.254	674.864	658.119	599.592	573.362	RBFOX2
ENSG00000100321	-0.0818622	0.67486	0.969428	233.616	214.207	265.313	354.288	278.94	258.328	SYNGR1
ENSG00000100324	0.145515	0.342311	0.907505	746.825	665.26	957.022	800.712	700.393	708.377	TAB1
ENSG00000100325	0.00153269	0.989185	0.998903	2457.94	2375.43	2310.96	2378	2241.95	2248.44	ASCC2
ENSG00000100330	-0.247165	0.248403	0.870152	131.72	188.084	152.66	155.755	114.705	128.714	MTMR3
ENSG00000100335	0.0538622	0.681046	0.970201	3189.85	3060.72	3242.72	3101.94	2659.93	2594.98	MIEF1
ENSG00000100342	-0.0407076	0.800142	0.982834	357.879	355.27	420.079	465.071	441.439	437.448	APOL1
ENSG00000100344	-0.317868	0.0782426	0.671208	347.938	499.816	341.117	383.903	284.154	326.736	PNPLA3
ENSG00000100345	-0.0978657	0.413249	0.92399	43702.3	46669.2	43085	49924.9	40883.5	40038.2	MYH9
ENSG00000100347	0.131623	0.268164	0.880876	1282.4	1221.68	1260.24	1125.38	1249.58	1113.42	SAMM50
ENSG00000100348	0.162085	0.224441	0.853882	2111.24	1750.23	2383.61	2258.45	2104.65	1892.01	TXN2
ENSG00000100350	0.0266285	0.841351	0.987024	592.738	600.824	673.811	607.663	596.116	620.167	FOXRED2
ENSG00000100353	-0.0428644	0.714279	0.975149	5498.67	5438.76	5727.39	6391.43	5507.55	5410.49	EIF3D
ENSG00000100354	0.202259	0.132677	0.769985	684.693	675.709	783.305	592.307	760.352	668.773	TNRC6B
ENSG00000100359	0.055985	0.684162	0.971196	1786.91	1747.61	2018.27	2047.85	1742.29	1542.77	SGSM3
ENSG00000100360	0.220889	0.177155	0.82138	267.167	213.336	246.362	214.986	241.575	218.724	IFT27
ENSG00000100364	0.167957	0.25603	0.872547	15803.9	13585.6	13948.9	12626	11328.8	10352	KIAA0930
ENSG00000100365	-0.0488041	0.740681	0.976633	3448.32	3133.86	3264.83	3855.48	2722.49	2770.5	NCF4
ENSG00000100368	0.213846	0.222788	0.853882	791.56	780.2	826.471	559.401	585.688	557.161	CSF2RB
ENSG00000100372	0.066594	0.643532	0.967532	446.107	437.121	427.449	381.709	453.604	447.349	SLC25A17
ENSG00000100376	0.0250183	0.865647	0.988729	494.569	478.047	549.577	563.789	476.197	453.649	FAM118A
ENSG00000100379	0.176753	0.307179	0.893069	303.203	249.037	277.947	279.701	253.74	209.723	KCTD17
ENSG00000100380	0.0102974	0.938112	0.996967	5371.92	5302.92	4243.96	4474.11	5346.79	5077.45	ST13
ENSG00000100385	0.0115522	0.963177	0.998855	111.837	133.226	204.249	223.761	225.064	183.62	IL2RB
ENSG00000100387	-0.0356958	0.787294	0.98232	1247.61	1226.03	1041.25	1221.91	1333.87	1266.44	RBX1
ENSG00000100393	-0.0858457	0.496316	0.946746	3970.22	4637.66	4052.34	4562.96	4088.52	3654.4	EP300
ENSG00000100395	0.155083	0.195459	0.836471	1678.8	1478.55	1668.74	1416.05	1472.91	1432.06	L3MBTL2
ENSG00000100399	0.00155385	0.995295	0.999429	62.1318	63.5654	80.0151	75.6837	60.8281	63.907	CHADL
ENSG00000100401	0.189707	0.150684	0.799707	3413.52	3009.34	4253.43	3486.94	3364.67	3177.35	RANGAP1
ENSG00000100403	0.363587	0.00998483	0.336049	3408.55	2699.35	3988.12	2736.68	2798.96	2486.97	ZC3H7B
ENSG00000100410	0.120916	0.326057	0.901586	1262.52	1044.91	1102.31	1085.9	1123.58	1075.62	PHF5A
ENSG00000100412	-0.106626	0.364898	0.913219	2259.11	2343.21	2017.22	2380.2	2095.1	2135.93	ACO2
ENSG00000100413	0.209048	0.137821	0.780454	2225.56	1916.54	2076.18	1785.7	1731.86	1514.86	POLR3H
ENSG00000100416	-0.00986757	0.942415	0.997043	868.603	911.685	1064.41	966.338	840.297	914.5	TRMU
ENSG00000100417	0.0215185	0.895977	0.992553	463.504	430.155	559.053	610.954	586.557	548.16	PMM1
ENSG00000100418	0.270156	0.02173	0.451088	1477.5	1279.15	1567.66	1186.81	1461.61	1270.04	DESI1
ENSG00000100422	-0.260266	0.0790185	0.674036	1632.82	1974.88	1541.34	1982.04	1346.91	1456.36	CERK
ENSG00000100425	-0.111053	0.410984	0.92399	1301.04	1527.31	1566.61	1773.63	1505.06	1425.76	BRD1
ENSG00000100426	0.0489471	0.675144	0.969428	1673.83	1689.27	1852.98	1741.82	1700.58	1622.88	ZBED4
ENSG00000100427	-0.0164845	0.929942	0.99557	3635.96	3441.24	5315.74	5926.36	5348.53	5101.76	MLC1
ENSG00000100429	-0.186797	0.220605	0.853882	579.069	694.866	762.249	839.102	610.888	690.375	HDAC10
ENSG00000100433	0.370751	0.418606	NA	14.9116	20.0275	26.3207	14.2593	40.8418	29.7032	KCNK10
ENSG00000100439	-0.298619	0.149114	0.798692	111.837	142.805	145.291	194.145	142.512	157.517	ABHD4
ENSG00000100441	-0.226056	0.0586011	0.622878	2136.09	2543.49	2158.3	2488.79	1926.51	2242.14	KHNYN
ENSG00000100442	0.00544244	0.96601	0.998855	818.898	771.493	738.034	734.9	762.09	801.987	FKBP3
ENSG00000100445	0.131783	0.412912	0.92399	315.63	317.827	404.287	333.447	323.258	301.533	SDR39U1
ENSG00000100448	0.00924158	0.977392	0.998855	13754.7	11617.7	22443.2	25277.3	20004.6	18950.7	CTSG
ENSG00000100461	-0.170522	0.166142	0.811164	2774.81	3107.74	2496.26	2837.59	2371.43	2652.59	RBM23
ENSG00000100462	0.371101	0.00217857	0.185137	1886.32	1446.33	1964.58	1345.85	1756.2	1540.97	PRMT5
ENSG00000100473	0.00821971	0.974016	0.998855	114.323	83.5929	123.181	148.077	159.022	164.718	COCH
ENSG00000100478	-0.0380145	0.834668	0.987024	197.579	187.213	178.981	172.208	190.305	221.424	AP4S1
ENSG00000100479	-0.0800007	0.709079	0.97508	132.962	126.26	143.185	194.145	177.271	162.018	POLE2
ENSG00000100483	-0.0672076	0.731517	0.976633	187.638	173.281	130.551	175.498	179.878	172.819	VCPKMT
ENSG00000100485	-0.277908	0.0301302	0.509553	971.742	1282.63	920.173	1136.35	1080.13	1185.43	SOS2
ENSG00000100490	0.0927485	0.745275	0.976633	48.4628	55.7286	62.117	53.7464	55.6143	46.8051	CDKL1
ENSG00000100503	0.174843	0.157038	0.799933	2726.35	2709.8	3258.51	2406.52	2870.22	2727.3	NIN
ENSG00000100504	-0.0270486	0.815784	0.985361	3386.19	3373.32	3620.68	3772.12	3762.66	3830.82	PYGL
ENSG00000100505	0.413225	0.434159	NA	17.3969	10.4491	30.5321	12.0655	11.2967	21.6024	TRIM9
ENSG00000100519	0.0939826	0.511358	0.950969	1693.71	1597.84	1453.96	1277.85	1752.72	1713.79	PSMC6
ENSG00000100522	0.0503952	0.765003	0.97836	449.835	465.856	370.596	333.447	465.77	441.048	GNPNAT1
ENSG00000100523	0.164463	0.246855	0.869331	529.363	499.816	591.69	446.424	544.846	539.159	DDHD1
ENSG00000100526	0.122599	0.478251	0.942705	566.642	455.407	532.732	552.82	722.986	667.873	CDKN3
ENSG00000100528	0.0318172	0.842957	0.987024	1796.85	1752.84	1282.35	1259.2	1665.82	1626.48	CNIH1
ENSG00000100532	0.0547653	0.815233	0.985221	115.565	130.614	94.7547	87.7492	113.836	92.7101	CGRRF1
ENSG00000100554	0.254118	0.0751286	0.664692	915.823	688.771	785.411	635.085	855.939	818.189	ATP6V1D
ENSG00000100564	0.345764	0.0371367	0.542371	407.585	318.698	343.223	244.601	337.162	289.832	PIGH
ENSG00000100567	-0.0421228	0.74365	0.976633	2158.46	1962.69	1890.88	2074.17	2195.9	2393.36	PSMA3
ENSG00000100568	0.00494044	0.972527	0.998855	3141.39	3065.07	2340.44	2474.53	2609.53	2520.27	VTI1B
ENSG00000100575	0.322435	0.0978713	0.713476	418.769	338.725	295.845	247.892	465.77	356.439	TIMM9
ENSG00000100577	-0.0553972	0.745722	0.976633	300.718	296.058	339.011	414.615	342.376	313.234	GSTZ1
ENSG00000100578	0.114248	0.528656	0.956004	382.732	372.685	417.973	326.866	500.529	503.155	KIAA0586
ENSG00000100580	0.0214563	0.87199	0.988916	1794.37	2053.25	1837.19	1565.23	1747.51	1678.68	TMED8
ENSG00000100583	-0.26007	0.386159	0.918085	52.1907	55.7286	44.2189	44.9715	39.9728	61.2067	SAMD15
ENSG00000100591	0.405122	0.00124783	0.136726	2447.99	1725.85	2373.08	1604.71	2084.67	1881.2	AHSA1
ENSG00000100592	-0.0909384	0.660594	0.96914	145.389	177.635	136.868	125.043	131.215	135.915	DAAM1
ENSG00000100596	-0.0641062	0.603623	0.966212	803.986	904.719	861.215	851.168	857.677	882.096	SPTLC2
ENSG00000100599	-0.309668	0.0865196	0.68972	805.229	923.876	523.256	850.071	616.102	633.669	RIN3
ENSG00000100600	-0.339234	0.405852	NA	21.1248	23.5105	17.8981	28.5185	25.2002	29.7032	LGMN
ENSG00000100601	0.124031	0.47124	0.940448	260.954	240.33	264.26	199.63	248.526	268.229	ALKBH1
ENSG00000100603	-0.0579978	0.616121	0.966212	2756.17	2587.03	2429.93	2620.41	2454.85	2744.4	SNW1
ENSG00000100605	0.0224188	0.870204	0.988827	2735.04	2513.01	2544.69	2865.01	2342.75	2126.93	ITPK1
ENSG00000100612	0.0423135	0.766218	0.978425	402.614	409.257	394.811	381.709	428.404	399.643	DHRS7
ENSG00000100614	-0.127859	0.357643	0.910289	818.898	905.59	715.924	797.421	887.222	943.303	PPM1A
ENSG00000100625	0.535172	0.296089	NA	11.1837	14.8029	18.9509	10.9687	33.89	18.9021	SIX4
ENSG00000100628	0.0860292	0.79555	0.982669	43.4923	37.4427	33.6906	40.584	39.9728	32.4035	ASB2
ENSG00000100629	0.118597	0.452119	0.93829	458.533	426.672	402.181	353.191	488.363	461.75	CEP128
ENSG00000100632	0.0627592	0.600563	0.966212	3823.59	3408.15	3152.17	3234.66	3580.17	3461.78	ERH
ENSG00000100644	0.0446285	0.715004	0.975149	1791.88	1812.92	1768.75	1598.13	1913.48	1895.61	HIF1A
ENSG00000100647	-0.214469	0.154793	0.799933	1718.57	2123.78	1471.86	1720.98	1407.74	1486.96	SUSD6
ENSG00000212907	0.792456	1.5192e-06	0.00295093	10418.3	5991.7	7753.04	4612.32	11592.1	6578.82	MT-ND4L		A10			A4
ENSG00000100664	-0.319085	0.00937111	0.335579	6808.41	8677.12	5709.5	7910.59	6787.55	7496.02	EIF5
ENSG00000100697	0.189072	0.212153	0.84778	1071.15	1152.89	1312.88	832.521	1095.78	1064.82	DICER1
ENSG00000100711	0.146056	0.339758	0.907505	417.526	426.672	565.37	455.199	484.018	445.548	ZFYVE21
ENSG00000100714	0.0303084	0.787963	0.982576	2744.98	2760.31	2774.21	2750.94	3042.28	2874.01	MTHFD1
ENSG00000100722	0.0296123	0.835023	0.987024	1150.68	1198.16	1089.68	937.82	1228.73	1261.04	ZC3H14
ENSG00000100726	-0.0286597	0.878301	0.988923	2198.22	2262.23	3156.38	3262.08	2060.34	2041.42	TELO2
ENSG00000100731	0.112936	0.362171	0.912778	1707.38	1766.77	1751.91	1487.35	1674.51	1491.46	PCNX1
ENSG00000100744	0.125366	0.448128	0.936213	289.534	261.228	285.317	227.051	282.416	296.132	GSKIP
ENSG00000100749	-0.0081264	0.949778	0.997043	1414.12	1261.73	1138.11	1260.3	1303.46	1353.75	VRK1
ENSG00000100764	-0.0682043	0.618022	0.966212	2321.25	2287.48	1749.8	1978.75	2136.81	2239.44	PSMC1
ENSG00000100767	-0.0715838	0.675385	0.969428	247.285	310.861	354.804	307.122	278.072	307.833	PAPLN
ENSG00000100784	-0.212058	0.321997	0.900232	94.4404	112.328	101.072	125.043	102.539	108.912	RPS6KA5
ENSG00000100796	-0.174864	0.145341	0.792703	2452.97	2806.46	2193.04	2399.94	2337.54	2674.19	PPP4R3A
ENSG00000100802	0.171519	0.415404	0.925097	123.021	101.879	142.132	120.655	141.643	139.515	C14orf93
ENSG00000100804	0.138705	0.267494	0.880876	1574.42	1400.18	1824.55	1566.32	1569.37	1547.27	PSMB5
ENSG00000100811	-0.11638	0.36411	0.91311	4873.62	5356.91	4103.93	4482.89	4208.44	4450.08	YY1
ENSG00000100813	-0.166364	0.152853	0.799933	4654.92	5247.2	5215.72	5677.38	4479.56	5180.06	ACIN1
ENSG00000100814	-0.119274	0.400817	0.921773	1207.84	1297.43	1024.4	1238.36	1028	1003.61	CCNB1IP1
ENSG00000100815	-0.0266856	0.87916	0.989237	841.265	1009.21	897.011	651.538	974.988	1101.72	TRIP11
ENSG00000100823	0.240592	0.0312734	0.514208	7370.08	5975.15	7170.82	5965.85	6422.58	5800.23	APEX1
ENSG00000100836	0.0587595	0.652539	0.96914	2430.6	2234.37	2775.26	2421.88	2121.16	2377.16	PABPN1
ENSG00000100865	0.0716889	0.62016	0.966212	602.679	599.953	638.015	616.438	557.881	495.054	CINP
ENSG00000100883	-0.0322918	0.803293	0.983726	1482.47	1407.15	1239.18	1298.69	1417.3	1524.77	SRP54
ENSG00000100888	-0.0897724	0.45535	0.939178	2855.58	3178.27	2890.02	2908.89	2551.31	2739.9	CHD8
ENSG00000100889	0.268752	0.0291011	0.505375	1491.16	1165.95	1532.92	1251.52	1559.81	1387.95	PCK2
ENSG00000100890	0.0455142	0.845234	0.987024	88.2272	101.008	104.23	75.6837	97.325	103.511	KIAA0391
ENSG00000100897	0.0430952	0.727087	0.976633	1665.13	1499.45	1692.95	1791.18	1614.55	1537.37	DCAF11
ENSG00000100902	0.171751	0.183544	0.82872	1528.44	1327.04	1258.13	1162.68	1408.61	1232.23	PSMA6
ENSG00000100906	-0.218554	0.0718567	0.659686	1446.43	1670.12	1281.29	1624.46	1386.88	1492.36	NFKBIA
ENSG00000100908	-0.0194451	0.92677	0.99557	127.992	141.934	194.774	198.533	179.878	171.919	EMC9
ENSG00000100911	0.0561795	0.624597	0.967532	2670.43	2410.26	2529.95	2674.16	2554.78	2375.36	PSME2
ENSG00000100916	-0.182596	0.379486	0.916659	160.3	195.921	140.026	127.236	145.119	180.02	BRMS1L
ENSG00000185252	0.758192	2.40064e-05	0.0178933	361.607	198.533	380.072	179.886	276.334	221.424	ZNF74		B10			B4
ENSG00000100926	-0.0354977	0.840303	0.987024	216.219	236.847	236.887	243.504	204.209	193.521	TM9SF1
ENSG00000100934	0.0749302	0.663443	0.96914	428.71	501.557	455.875	330.156	496.184	477.952	SEC23A
ENSG00000100938	0.135911	0.269278	0.880876	1021.45	948.257	1126.53	1013.5	1127.93	1021.61	GMPR2
ENSG00000100941	-0.234261	0.0397388	0.555168	3347.66	3836.57	3375.37	3664.63	3247.35	4225.06	PNN
ENSG00000100949	-0.222739	0.110577	0.739189	831.324	967.414	844.37	1049.7	751.662	815.489	RABGGTA
ENSG00000100979	0.0554917	0.702312	0.972358	575.341	510.265	504.306	589.017	553.536	473.452	PLTP
ENSG00000100982	-0.154993	0.273435	0.880876	884.757	952.611	911.751	1101.25	799.456	837.091	PCIF1
ENSG00000100983	-0.120242	0.439866	0.934958	813.927	860.31	1047.57	1203.26	925.457	969.405	GSS
ENSG00000100985	-0.537307	0.0849356	0.688242	49.7055	59.2116	28.4264	55.9401	39.1038	54.0059	MMP9
ENSG00000100991	-0.172532	0.150019	0.798692	2178.34	2391.11	2218.31	2686.22	2104.65	2251.14	TRPC4AP
ENSG00000100994	0.0361483	0.778729	0.981368	2183.31	2243.08	2409.93	2189.34	1946.5	1944.21	PYGB
ENSG00000100997	0.00432669	0.971775	0.998855	1386.78	1274.79	1205.49	1350.24	1286.95	1242.14	ABHD12
ENSG00000101000	0.235974	0.197422	0.83867	173.969	149.771	190.562	146.98	172.926	159.317	PROCR
ENSG00000101003	0.146731	0.298367	0.890986	902.154	857.698	971.762	790.84	1071.44	1012.61	GINS1
ENSG00000101004	-0.266594	0.151672	0.799933	275.865	355.27	370.596	506.752	350.196	341.137	NINL
ENSG00000101017	-0.148601	0.407113	0.923518	248.527	273.418	260.049	363.062	335.424	303.333	CD40
ENSG00000101019	0.0433633	0.755889	0.978248	764.222	721.86	743.298	620.826	689.096	785.785	UQCC1
ENSG00000101040	0.237576	0.0754286	0.664692	671.024	547.708	702.238	613.148	735.152	629.168	ZMYND8
ENSG00000101052	-0.175493	0.219234	0.853882	533.091	522.456	457.981	609.857	532.681	589.564	IFT52
ENSG00000101057	-0.0731009	0.569539	0.96546	6146.08	6012.59	6539.13	7821.75	6966.56	6843.44	MYBL2
ENSG00000101079	-0.0394595	0.786257	0.981962	367.82	364.848	361.121	406.937	380.61	369.94	NDRG3
ENSG00000101082	-0.224835	0.37158	0.914544	70.8303	74.8853	80.0151	93.2336	60.8281	79.2086	SLA2
ENSG00000101084	0.0598206	0.624133	0.967467	1982.01	1843.4	1671.89	1700.14	1907.4	1790.29	C20orf24
ENSG00000101096	-0.0811336	0.604191	0.966212	383.975	443.217	414.815	502.364	451.866	380.741	NFATC2
ENSG00000101098	0.664537	0.00297958	0.21528	119.293	72.273	153.713	98.7179	144.25	93.6102	RIMS4
ENSG00000101104	-0.146822	0.574946	0.965651	62.1318	84.4637	108.441	83.3618	69.5179	98.1107	PABPC1L
ENSG00000101109	-0.00533794	0.973404	0.998855	3673.23	4002.01	2942.66	2557.89	3097.89	3185.45	STK4
ENSG00000101115	-0.0201923	0.958908	0.998653	19.8822	29.6058	29.4792	37.2934	38.2348	23.4025	SALL4
ENSG00000101126	-0.119664	0.290897	0.887832	2405.74	2715.03	2295.17	2549.12	2548.7	2612.98	ADNP
[truncated: 13,733 more rows]

## Sheet: Table 2 shNR4A2 +LPS
ID	log2FoldChange	pvalue	padj	A3	A9	B3	B9	C3	C9	Gene.name	shNR4A2 Cells	Differential gene expression analysis
ENSG00000000003	0.0684899	0.805953	0.945722	84.3444	78.4159	58.6356	52.9067	87.1149	88.3968	TSPAN6	LPS	shNR4A2 5% CO2 Vs shNR4A2 10% CO2 (4h)
ENSG00000000419	-0.130923	0.382511	0.73312	1303.01	1455.31	1061.3	1108.21	1051.67	1177.67	DPM1		Ranked by fold change
ENSG00000000457	0.21081	0.356727	0.713775	115.703	107.245	155.384	130.377	183.211	154.932	SCYL3		Padj </=0.05
ENSG00000000460	0.189211	0.292347	0.660213	169.77	163.751	200.338	147.383	186.803	177.744	C1orf112
ENSG00000000938	0.0815592	0.694268	0.906276	1072.69	1042.47	731.968	586.697	798.404	831.69	FGR		shNR4A2 5% CO2 samples			shNR4A2 10% CO2 samples
ENSG00000001036	-0.207682	0.0882925	0.376862	1487.92	1847.39	1482.5	1653.33	1376.77	1520.81	FUCA2
ENSG00000001084	-0.110822	0.400533	0.748688	463.894	569.668	519.902	511.116	511.912	536.084	GCLC		A10			A4
ENSG00000001167	0.299116	0.019869	0.171684	2543.31	2058.42	2701.15	1834.73	2458.08	2366.75	NFYA		B10			B4
ENSG00000001460	-0.0631052	0.780057	0.93767	102.727	110.705	114.339	126.598	153.574	150.18	STPG1		C10			C4
ENSG00000001461	-0.141558	0.367487	0.72242	367.655	384.007	392.858	509.227	420.307	408.716	NIPAL3
ENSG00000001497	0.0314929	0.801169	0.945381	1221.91	1232.74	1461.98	1416.2	1373.18	1320.25	LAS1L
ENSG00000001561	0.494374	0.00352269	0.0630402	416.315	315.97	492.539	256.975	406.836	361.191	ENPP4
ENSG00000001617	-0.218434	0.333435	0.697867	91.9137	118.777	116.294	157.775	123.937	110.258	SEMA3F
ENSG00000001629	0.140944	0.340637	0.702783	861.827	762.249	769.104	768.092	715.779	597.867	ANKIB1
ENSG00000001630	-0.576166	0.0104428	0.120703	123.273	178.742	105.544	207.848	114.058	124.516	CYP51A1
ENSG00000001631	0.142411	0.322572	0.688832	748.286	645.778	755.422	595.2	749.009	799.373	KRIT1
ENSG00000002016	0.381787	0.307451	0.674967	34.6028	19.604	58.6356	44.4038	56.5798	50.3767	RAD52
ENSG00000002330	-0.107517	0.438971	0.773037	384.956	427.828	379.177	395.855	352.95	380.201	BAD
ENSG00000002549	0.147683	0.255411	0.621761	2622.25	2478.17	2820.37	2121.94	2746.37	2792.58	LAP3
ENSG00000002586	-0.23016	0.042696	0.257449	3433.25	4446.64	3770.27	4256.15	4106.97	4566.22	CD99
ENSG00000002726	-0.0512443	0.770537	0.934265	435.779	433.594	308.814	359.954	345.765	336.478	AOC1
ENSG00000167244	1.88624	6.11154e-05	0.00506764	59.4736	14.9913	29.3178	5.66857	35.9237	13.307	IGF2	LPS	shNR4A2 5% CO2+ LPS Vs shNR4A2 10% CO2 + LPS
ENSG00000002834	-0.262829	0.0218219	0.181365	4421.59	5012.85	3892.43	5476.79	4397.96	4762.02	LASP1
ENSG00000187037	1.73612	5.32267e-05	0.0046409	59.4736	24.2167	89.9079	6.61334	82.6245	38.9706	GPR141		Ranked by fold change
ENSG00000002933	1.04905	0.0471816	NA	30.2775	14.9913	33.2268	6.61334	12.5733	15.2081	TMEM176A
ENSG00000003056	0.0961671	0.417943	0.759817	3306.73	3099.73	3107.69	2740.76	2792.17	2772.62	M6PR
ENSG00000003096	0.290484	0.36275	0.719294	67.043	36.9016	106.521	85.0286	74.5416	79.8423	KLHL13
ENSG00000003137	-0.697425	0.0430902	0.258633	31.3588	39.208	20.5225	47.2381	26.9428	40.8716	CYP26B1
ENSG00000003147	-0.501084	0.0170309	0.157891	157.875	244.473	126.067	234.301	169.739	164.437	ICA1
ENSG00000003249	-0.583098	0.0076687	0.101163	78.9377	117.624	87.9534	148.328	86.2168	113.11	DBNDD1
ENSG00000003393	0.332798	0.0100586	0.118799	575.272	448.585	628.378	479.939	599.925	502.816	ALS2
ENSG00000003400	0.129692	0.483877	0.80311	322.239	296.366	332.268	233.356	336.784	376.399	CASP10
ENSG00000003402	0.287197	0.0796724	0.357762	7881.87	6227.15	6474.35	4323.23	6274.97	6356.97	CFLAR
ENSG00000003436	-0.521416	0.00399757	0.0678494	126.517	198.346	126.067	175.726	143.695	195.804	TFPI
ENSG00000003509	0.131759	0.438205	0.772588	226	185.661	200.338	177.615	198.478	206.259	NDUFAF7
ENSG00000003756	0.0853047	0.473034	0.797249	2587.64	2490.86	2429.47	2186.18	2714.93	2611.98	RBM5
ENSG00000003987	-0.57857	0.0658066	0.323436	37.8468	44.9738	31.2723	52.9067	28.7389	47.5252	MTMR7
ENSG00000171714	1.60891	1.10153e-09	2.60501e-06	134.086	53.0461	193.497	41.5695	195.784	76.9908	ANO5		Padj </=0.05
ENSG00000004059	0.0226411	0.848638	0.958999	1599.3	1794.34	1673.07	1493.67	1679.43	1589.24	ARF5
ENSG00000004139	-0.632822	0.14113	NA	17.3014	20.7572	14.6589	31.1772	17.0637	23.7626	SARM1
ENSG00000004142	0.120524	0.301164	0.668617	2109.69	2059.57	2028.79	1726.08	1982.09	1845.88	POLDIP2
ENSG00000004399	-0.0399133	0.796902	0.943288	809.922	812.988	899.079	1034.51	1082.2	1021.79	PLXND1
ENSG00000004455	-0.0782065	0.484358	0.803352	9042.15	9183.89	8406.39	9249.22	7828.67	8251.32	AK2
ENSG00000004468	-0.408524	0.0198689	0.171684	766.669	987.118	586.356	871.071	561.307	682.461	CD38
ENSG00000004478	0.444767	0.00274263	0.0538443	718.009	537.38	861.943	657.555	744.518	512.321	FKBP4
ENSG00000004487	-0.0275381	0.79601	0.943135	2173.49	2093.01	2032.7	2211.69	2028.79	2049.28	KDM1A
ENSG00000004534	-0.101191	0.403816	0.751771	1443.59	1572.93	1321.26	1471	1307.62	1325	RBM6
ENSG00000004660	-0.039337	0.859612	0.961519	141.655	147.606	97.726	121.874	156.268	137.823	CAMKK1
ENSG00000004700	0.0260517	0.830614	0.952964	786.133	725.347	729.036	715.185	762.48	795.571	RECQL
ENSG00000004766	0.022135	0.900411	0.977128	248.708	228.329	217.929	250.362	211.052	188.2	VPS50
ENSG00000004777	-0.192183	0.404925	0.752112	138.411	163.751	167.111	241.859	238.892	216.715	ARHGAP33
ENSG00000004779	0.145421	0.214806	0.576761	1102.96	1026.33	1100.39	925.867	1013.95	957.157	NDUFAB1
ENSG00000138685	1.57182	0.000787153	0.0259109	577.435	160.291	499.38	83.1391	455.333	271.844	FGF2
ENSG00000004809	-0.118573	0.426612	0.764978	603.387	642.318	553.129	709.517	569.39	521.826	SLC22A16
ENSG00000004838	-0.50622	0.22298	NA	15.1387	21.9103	21.4997	31.1772	18.8599	25.6636	ZMYND10
ENSG00000004848	-0.330635	0.382199	0.73312	19.4641	27.6762	27.3633	29.2876	23.3504	31.3666	ARX
ENSG00000004864	0.095836	0.537909	0.836355	329.808	372.476	389.927	326.888	344.867	298.458	SLC25A13
ENSG00000004866	0.158688	0.292422	0.660213	390.363	318.276	385.04	362.789	333.192	310.815	ST7
ENSG00000004897	-0.124139	0.347141	0.7079	1312.74	1316.93	1472.73	1693.01	1404.62	1555.02	CDC27
ENSG00000004961	0.193566	0.168671	0.520517	635.827	560.443	714.377	560.244	717.575	687.214	HCCS
ENSG00000004975	-0.164188	0.314211	0.681834	316.832	314.817	322.496	428.922	322.415	332.676	DVL2
ENSG00000005007	0.261863	0.0154939	0.14967	4534.05	3571.38	4469.99	3543.8	4387.18	4052	UPF1
ENSG00000005020	0.135951	0.233005	0.597393	2421.12	2038.81	2316.11	2062.42	2045.85	2070.2	SKAP2
ENSG00000005022	-0.032558	0.784539	0.939367	8346.85	8858.69	7978.35	7383.32	7232.33	7854.01	SLC25A5
ENSG00000005059	-0.3642	0.388542	NA	27.0335	18.4508	16.6134	27.3981	20.6561	36.1191	MCUB
ENSG00000005073	-0.135593	0.450102	0.77948	275.741	289.447	303.928	400.579	298.167	273.745	HOXA11
ENSG00000005075	-0.0935835	0.489692	0.806651	785.052	991.731	854.125	804.938	923.239	940.048	POLR2J
ENSG00000165449	1.53645	9.84322e-09	8.76046e-06	108.134	33.4421	151.475	43.4591	139.204	59.8817	SLC16A9		shNR4A2 5% CO2 + LPS samples			shNR4A2 10% CO2+LPS samples
ENSG00000005108	0.133684	0.434061	0.770778	1634.98	1231.59	1994.59	1971.72	1749.48	1697.6	THSD7A
ENSG00000005156	0.182682	0.315222	0.682428	446.593	386.314	609.81	559.299	608.906	520.876	LIG3
ENSG00000005175	-0.0765349	0.549638	0.841781	564.459	655.003	654.764	614.096	601.722	652.045	RPAP3
ENSG00000005187	0.113022	0.70162	0.909557	62.7176	51.8929	52.772	40.6248	62.8664	72.2382	ACSM3
ENSG00000005189	-0.117971	0.466333	0.792256	281.148	363.25	357.677	394.911	383.485	352.637	REXO5
ENSG00000005194	0.0392772	0.730835	0.918792	1133.24	1108.2	1119.94	1082.7	1047.18	1020.84	CIAPIN1
ENSG00000005206	0.0638058	0.653957	0.887994	937.52	862.575	982.146	969.326	1145.97	1100.68	SPPL2B
ENSG00000229373	1.53479	2.92549e-05	0.00312442	130.842	35.7484	100.658	18.8952	56.5798	44.6737	LINC00452
ENSG00000005243	-0.204175	0.351829	0.71136	135.167	187.968	184.702	243.749	238.892	212.913	COPZ2
ENSG00000005249	0.364922	0.0492766	0.277883	357.923	260.618	336.177	203.124	319.721	323.171	PRKAR2B
ENSG00000005302	-0.17028	0.286638	0.655572	259.521	281.375	293.178	358.065	298.167	317.468	MSL3
ENSG00000005339	-0.0259622	0.827356	0.952091	2125.91	1951.17	1936.93	2313.72	2114.11	2022.67	CREBBP
ENSG00000005379	-0.185665	0.5034	0.814575	188.153	187.968	300.996	399.634	364.625	383.053	TSPOAP1
ENSG00000005381	-0.0737768	0.819652	0.949905	37.8468	48.4334	70.3627	74.6362	84.4206	79.8423	MPO
ENSG00000005436	0.216122	0.152528	0.494116	557.97	463.576	527.72	410.972	427.492	427.726	GCFC2
ENSG00000005448	-0.189995	0.321922	0.688005	138.411	159.138	165.157	204.069	182.313	191.051	WDR54
ENSG00000005469	0.179274	0.470028	0.794892	70.287	56.5056	73.2945	64.2438	70.0512	67.4857	CROT
ENSG00000005471	-0.185103	0.347567	0.707928	153.55	177.589	189.588	230.522	160.758	164.437	ABCB4
ENSG00000005483	0.0854535	0.459377	0.786341	1392.76	1321.54	1361.32	1365.18	1348.93	1180.52	KMT2E
ENSG00000005486	-0.0986068	0.416773	0.759311	615.281	668.842	610.787	671.726	665.486	685.313	RHBDD2
ENSG00000005700	0.00273293	0.98153	0.995812	1441.42	1411.49	1544.07	1527.68	1337.26	1374.43	IBTK
ENSG00000005801	0.0735916	0.5566	0.845656	603.387	597.345	643.037	552.686	603.518	608.322	ZNF195
ENSG00000005810	0.361926	0.0264832	0.199835	2598.46	1547.56	2523.29	2310.89	2095.25	1754.63	MYCBP2
ENSG00000005812	-0.0113625	0.929123	0.984624	880.209	855.656	848.262	769.981	810.079	932.444	FBXL3
ENSG00000005844	-0.115285	0.510977	0.818716	1353.84	1381.5	1719.98	2152.17	1820.43	1766.99	ITGAL
ENSG00000005882	-0.529226	0.0118719	0.128644	152.469	219.103	143.657	261.699	146.389	157.784	PDK2
ENSG00000005884	0.427914	0.147035	0.486505	50.8229	36.9016	53.7493	38.7353	48.497	38.0201	ITGA3
ENSG00000005889	0.234873	0.0512391	0.283835	942.927	748.411	979.214	803.048	881.926	829.789	ZFX
ENSG00000005893	-0.0736689	0.514659	0.821629	5575.38	5396.86	4902.91	5365.31	4652.12	5159.33	LAMP2
ENSG00000005961	0.0392495	0.88513	0.971438	50.8229	50.7397	55.7038	56.6857	56.5798	51.3272	ITGA2B
ENSG00000006007	-0.0803149	0.519304	0.823955	910.487	855.656	843.375	999.559	837.92	883.017	GDE1
ENSG00000006015	-0.0810409	0.535553	0.835271	486.602	560.443	558.993	553.631	504.728	526.579	REX1BD
ENSG00000006016	-0.14341	0.597939	0.86666	44.3349	62.2715	58.6356	56.6857	57.4779	58.9312	CRLF1
ENSG00000006025	0.0788013	0.720843	0.915107	102.727	108.398	120.203	121.874	156.268	129.268	OSBPL7
ENSG00000006062	-0.124845	0.640327	0.881366	89.7511	93.4072	61.5674	78.4153	63.7645	62.7332	MAP3K14
ENSG00000006118	0.00819586	0.983145	0.996571	42.1722	49.5865	24.4315	24.5638	35.0256	27.5646	TMEM132A
ENSG00000006125	0.15565	0.177029	0.531463	3824.69	3182.76	3956.93	3778.1	4121.34	3723.12	AP2B1
ENSG00000006194	-0.0105865	0.928191	0.984496	985.099	912.161	937.192	971.216	877.436	935.295	ZNF263
ENSG00000006282	-0.190632	0.12374	0.446175	570.947	680.373	564.856	640.549	616.989	680.56	SPATA20
ENSG00000137558	1.53436	0.00119843	0.032785	43.2535	17.2976	60.5901	4.72381	36.8218	26.6141	PI15		A9			A3
ENSG00000006432	-0.262586	0.640919	NA	17.3014	8.07223	13.6816	31.1772	12.5733	12.3565	MAP3K9
ENSG00000006451	-0.0146356	0.919442	0.981446	792.621	750.717	614.696	649.997	647.524	674.857	RALA
ENSG00000006453	0.521982	0.125706	0.449794	55.1482	47.2802	131.93	66.1334	119.446	99.8028	BAIAP2L1
ENSG00000006459	-0.507064	0.0352636	0.232975	238.976	267.537	141.703	308.937	156.268	185.348	KDM7A
ENSG00000006468	-0.897019	0.0897815	NA	4.32535	21.9103	16.6134	27.3981	14.3695	17.1091	ETV1
ENSG00000006530	0.0247842	0.854241	0.960112	401.176	379.395	405.563	385.463	376.301	397.31	AGK
ENSG00000121594	1.51202	4.41232e-05	0.00411919	71.3683	18.4508	52.772	13.2267	64.6626	34.2181	CD80		B9			B3
ENSG00000116833	1.5003	0.00169159	0.0400077	27.0335	11.5318	58.6356	7.5581	38.618	24.7131	NR5A2		C9			C3
ENSG00000006607	-0.0870849	0.538124	0.836355	974.286	915.621	821.876	1007.12	785.83	818.383	FARP2
ENSG00000006611	-0.276413	0.200158	0.558266	90.8324	131.462	99.6805	135.101	132.918	126.417	USH1C
ENSG00000006625	0.0728102	0.627004	0.875576	613.119	508.55	543.357	492.221	452.638	527.529	GGCT
ENSG00000006634	-0.034992	0.796331	0.943135	790.458	718.428	678.218	735.025	625.072	690.065	DBF4
ENSG00000006638	-0.693676	0.0566188	0.299332	24.8708	53.0461	24.4315	65.1886	46.7008	38.0201	TBXA2R
ENSG00000006652	0.202938	0.173853	0.527365	2159.43	1861.22	1719.98	1377.46	1821.33	1714.71	IFRD1
ENSG00000006695	0.161652	0.366036	0.721596	228.162	189.121	225.747	179.505	175.128	192.952	COX10
ENSG00000251194	1.50008	0.000354138	0.0151046	31.3588	24.2167	46.9085	12.2819	54.7836	11.406	AL133330.1
ENSG00000006712	-0.22568	0.0527416	0.288118	1308.42	1571.78	1193.23	1500.28	1396.53	1487.54	PAF1
ENSG00000006715	0.0374621	0.747186	0.92408	1494.41	1380.35	1313.44	1338.73	1313.01	1295.54	VPS41
ENSG00000006740	0.345478	0.084772	0.368634	162.201	132.615	164.18	148.328	160.758	102.654	ARHGAP44
ENSG00000006744	0.0473697	0.714202	0.913837	682.324	732.266	822.853	770.926	795.709	724.283	ELAC2
ENSG00000006747	-0.116804	0.585849	0.860823	97.3204	104.939	94.7942	124.709	119.446	108.357	SCIN
ENSG00000006756	-0.27355	0.0202132	0.172979	775.319	940.991	844.353	946.652	762.48	991.375	ARSD
ENSG00000006757	0.141672	0.491098	0.806776	114.622	129.156	154.407	132.267	140.102	110.258	PNPLA4
ENSG00000230647	1.48815	0.000205807	0.0107325	54.0669	24.2167	54.7266	7.5581	48.497	24.7131	AC022816.1
ENSG00000006837	0.302798	0.481372	NA	21.6268	29.9826	24.4315	17.0057	29.637	15.2081	CDKL3
ENSG00000007047	-0.268601	0.0599956	0.307581	860.745	1164.71	812.103	1127.1	998.678	928.642	MARK4
ENSG00000007080	0.186843	0.119972	0.439162	1214.34	1197	1302.69	1010.9	1271.7	1122.54	CCDC124
ENSG00000007129	-0.10244	0.649486	0.885663	76.775	95.7135	85.0216	96.3658	95.1977	84.5948	CEACAM21
ENSG00000007168	-0.219733	0.0574648	0.302148	1337.62	1614.45	1326.14	1527.68	1241.16	1405.79	PAFAH1B1
ENSG00000007202	0.166045	0.225162	0.588002	4477.82	3674.02	4489.53	4720.98	4341.38	3465.53	KIAA0100
ENSG00000007237	-0.493018	0.00507102	0.0784656	2136.72	2944.06	1666.23	2654.78	1551.9	1937.13	GAS7
ENSG00000007255	-0.0350712	0.804356	0.945701	676.918	822.214	682.127	633.936	696.919	652.996	TRAPPC6A
ENSG00000007264	-0.11819	0.575651	0.855716	309.263	374.782	213.043	237.135	276.612	256.636	MATK
ENSG00000007312	-0.0148869	0.971207	0.994133	23.7894	23.0635	18.5679	34.0114	42.2103	28.5151	CD79B
ENSG00000007314	-0.234059	0.664282	NA	9.73204	11.5318	10.7499	13.2267	13.4714	15.2081	SCN4A
ENSG00000007341	0.283789	0.0663539	0.32403	504.985	446.279	476.903	336.335	434.677	382.102	ST7L
ENSG00000232783	1.46961	1.56238e-06	0.000375045	156.794	64.5778	132.907	25.5086	105.077	53.2282	FRG2FP
ENSG00000007372	-0.41798	0.227627	0.590751	25.9521	36.9016	24.4315	39.68	32.3313	34.2181	PAX6
ENSG00000007376	-0.195068	0.177166	0.531498	602.305	693.058	595.151	712.351	523.588	564.599	RPUSD1
ENSG00000007384	-0.119119	0.411523	0.755581	426.047	552.371	466.153	504.503	546.04	507.569	RHBDF1
ENSG00000007392	0.275245	0.103183	0.403248	599.061	501.631	544.334	360.899	561.307	546.539	LUC7L
ENSG00000007516	-0.0423048	0.903367	0.977863	36.7655	34.5953	24.4315	31.1772	38.618	37.0696	BAIAP3
ENSG00000007520	0.0873804	0.502902	0.814281	617.444	643.472	615.674	594.256	655.607	541.787	TSR3
ENSG00000007541	0.0204546	0.883655	0.970924	500.66	498.172	569.743	594.256	546.04	500.915	PIGQ
ENSG00000007545	0.206894	0.147874	0.487438	522.286	402.458	557.038	513.006	544.244	489.509	CRAMP1
ENSG00000273036	1.45136	2.31571e-08	1.62709e-05	142.737	48.4334	128.998	51.0172	201.173	73.1887	AL390726.5
ENSG00000007908	0.837381	0.122857	NA	15.1387	9.2254	23.4542	6.61334	15.2676	14.2575	SELE
ENSG00000007923	-0.00870853	0.943724	0.988106	1015.38	1036.7	940.124	1035.46	987.901	889.671	DNAJC11
ENSG00000007944	-0.360272	0.03208	0.220772	207.617	268.69	225.747	258.865	174.23	251.883	MYLIP
ENSG00000007968	-0.443868	0.010819	0.12272	366.574	499.325	373.313	613.151	367.32	393.508	E2F2
ENSG00000008018	-0.0254744	0.814902	0.947685	3713.32	3743.21	3578.73	3398.31	3300.49	3639.48	PSMB1
ENSG00000008056	-0.109628	0.808587	NA	16.2201	21.9103	14.6589	17.0057	21.5542	18.0596	SYN1
ENSG00000172575	1.42573	3.40011e-06	0.000696061	198.966	87.6413	246.27	36.8457	210.154	119.763	RASGRP1
ENSG00000008086	0.12248	0.678264	0.900513	43.2535	48.4334	51.7948	37.7905	52.0893	49.4262	CDKL5
ENSG00000008128	0.132104	0.432	0.769679	248.708	241.014	231.611	199.345	272.122	247.131	CDK11A
ENSG00000008130	0.0334245	0.775859	0.935381	1214.34	1253.5	1141.44	1117.65	1189.07	1094.03	NADK
ENSG00000008226	0.295827	0.500716	NA	24.8708	21.9103	18.5679	17.0057	21.5542	14.2575	DLEC1
ENSG00000008256	-0.121496	0.403018	0.750619	605.549	575.434	506.221	643.383	499.339	532.282	CYTH3
ENSG00000008277	0.243504	0.362246	0.719178	74.6123	47.2802	87.9534	84.0839	80.8283	73.1887	ADAM22
ENSG00000008282	-0.0124346	0.910113	0.980394	1604.71	1538.34	1545.05	1546.58	1427.07	1530.31	SYPL1
ENSG00000008283	-0.0437412	0.802937	0.945637	163.282	174.129	187.634	188.008	195.784	201.507	CYB561
ENSG00000008294	0.0290655	0.801996	0.945381	2843.92	2621.17	2523.29	2383.64	2522.74	2726.99	SPAG9
ENSG00000008300	0.391532	0.0612853	0.310851	153.55	101.479	166.134	149.272	194.886	140.674	CELSR3
ENSG00000008311	0.241496	0.651937	NA	11.8947	6.91905	27.3633	25.5086	19.758	17.1091	AASS
ENSG00000008324	0.171084	0.268492	0.633987	504.985	468.189	498.403	357.12	451.74	467.648	SS18L2
ENSG00000008382	-0.0749438	0.600509	0.867585	317.913	372.476	338.132	361.844	358.339	335.528	MPND
ENSG00000008394	0.227129	0.139845	0.474079	1718.25	1552.17	1656.46	1102.54	1612.97	1607.3	MGST1
ENSG00000008405	0.318707	0.0550529	0.295835	233.569	193.733	234.542	169.112	212.848	183.447	CRY1
ENSG00000008441	-0.31776	0.0751341	0.347915	261.684	350.565	317.609	463.878	352.052	346.934	NFIX
ENSG00000008513	-0.469571	0.0436535	0.260749	1730.14	1792.03	1040.78	2416.7	1153.15	1223.3	ST3GAL1
ENSG00000008516	0.0888982	0.801578	0.945381	28.1148	33.4421	31.2723	26.4533	34.1275	28.5151	MMP25
ENSG00000008517	0.426056	0.160133	0.507183	141.655	137.228	147.566	57.6305	188.599	161.586	IL32
ENSG00000008710	0.385795	0.00324914	0.0604966	3665.74	2309.81	2901.48	2741.7	3218.76	2436.14	PKD1
ENSG00000008735	-0.440121	0.405276	NA	8.65071	18.4508	8.79534	18.8952	21.5542	16.1586	MAPK8IP2
ENSG00000008838	-0.14852	0.196332	0.553078	1479.27	1764.36	1636.91	1856.46	1727.93	1749.88	MED24
ENSG00000008853	-0.258154	0.163257	0.511737	391.444	438.207	388.949	609.372	405.938	370.696	RHOBTB2
ENSG00000008869	-0.221519	0.147097	0.486557	395.77	402.458	386.018	538.515	410.428	447.687	HEATR5B
ENSG00000008952	-0.00185558	0.988003	0.997349	2644.95	2533.53	2392.33	2228.69	2157.22	2440.89	SEC62
ENSG00000008988	0.00773923	0.95594	0.990746	24119.2	25311	21272	18404	20415.4	21740.9	RPS20
ENSG00000009307	-0.0443858	0.682523	0.902228	27519	27402.9	25174.2	25025.8	23651.3	26300.4	CSDE1
ENSG00000009335	0.120736	0.266142	0.631784	4285.34	3890.81	4216.88	3951.94	3882.45	3547.28	UBE3C
ENSG00000009413	0.268104	0.0325923	0.223132	1235.97	952.523	1299.76	1074.19	1093.88	985.672	REV3L
ENSG00000009724	0.016218	0.967125	0.992429	16.2201	34.5953	42.9994	33.0667	43.1084	34.2181	MASP2
ENSG00000009780	-0.632825	0.0156222	0.150257	54.0669	73.8032	56.6811	83.1391	41.3122	77.9413	FAM76A
ENSG00000009790	-0.252284	0.27297	0.639485	109.215	102.633	95.7715	161.554	114.956	115.961	TRAF3IP3
ENSG00000009830	0.0977857	0.581348	0.859563	215.186	236.401	222.815	172.892	234.402	220.517	POMT2
ENSG00000009844	0.0440089	0.699217	0.908651	1850.17	1914.27	1840.18	1630.66	1783.61	1766.03	VTA1
ENSG00000009950	-0.243866	0.314239	0.681834	138.411	179.895	117.271	109.592	94.2997	125.466	MLXIPL
ENSG00000009954	-0.0817488	0.483912	0.80311	2918.53	2701.89	2508.63	3041.19	2603.57	2753.61	BAZ1B
ENSG00000010017	-0.201702	0.0672539	0.327017	1238.13	1428.78	1318.32	1529.57	1250.14	1419.1	RANBP9
ENSG00000010030	-0.290643	0.648283	NA	3.24401	9.2254	17.5907	15.1162	9.87901	13.307	ETV7
ENSG00000010072	-0.0410484	0.76626	0.9332	511.473	525.848	463.221	449.707	449.046	489.509	SPRTN
ENSG00000010165	0.167894	0.211218	0.571726	711.521	630.787	772.035	601.814	735.537	742.343	METTL13
ENSG00000010219	-0.0410294	0.934407	NA	9.73204	12.6849	20.5225	17.0057	17.0637	19.0101	DYRK4
ENSG00000010244	-0.00435031	0.975483	0.994508	6789.72	7210.8	5878.22	5418.21	5626.55	5722.03	ZNF207
ENSG00000010256	0.0261393	0.805486	0.945722	3367.29	3492.97	3601.2	3232.03	3557.34	3612.86	UQCRC1
ENSG00000010270	0.240416	0.0620619	0.313282	1670.67	1380.35	1653.52	1197.01	1491.73	1498.94	STARD3NL
ENSG00000010278	-0.0866864	0.683216	0.902535	130.842	168.364	136.816	143.604	194.886	180.596	CD9
ENSG00000010292	-0.0920491	0.61475	0.872333	1376.54	1406.87	1786.43	1984.95	2023.4	2135.78	NCAPD2
ENSG00000010295	-0.240273	0.177699	0.53226	218.43	231.788	172.975	266.423	239.791	247.131	IFFO1
ENSG00000010310	-0.0993315	0.692641	0.905463	63.799	81.8754	65.4764	77.4705	76.3378	61.7827	GIPR
ENSG00000162692	1.41371	0.000571776	0.0207989	32.4401	12.6849	55.7038	14.1714	57.4779	27.5646	VCAM1
ENSG00000010319	-0.504537	0.155568	0.498879	21.6268	49.5865	47.8857	75.581	58.376	57.0302	SEMA3G
ENSG00000010322	-0.0181385	0.886218	0.971906	1351.67	1361.9	1324.19	1570.2	1501.61	1298.39	NISCH
ENSG00000010327	0.218245	0.73909	NA	22.7081	16.1445	3.90904	5.66857	15.2676	14.2575	STAB1
ENSG00000010361	0.501275	0.124817	0.44781	40.0095	26.523	51.7948	42.5143	52.0893	32.3171	FUZ
ENSG00000010404	-0.229306	0.122388	0.443386	1380.87	1540.64	1073.03	1250.87	1057.95	1325	IDS
ENSG00000010539	0.0229955	0.869109	0.964904	493.09	470.495	495.471	432.701	472.396	534.183	ZNF200
ENSG00000010610	-0.0580596	0.585679	0.860823	4274.53	4541.2	4138.7	4357.24	3988.43	4013.02	CD4
ENSG00000010626	-0.270589	0.437671	0.772311	31.3588	31.1357	27.3633	33.0667	34.1275	47.5252	LRRC23
ENSG00000010671	-0.145808	0.228562	0.592252	1256.51	1293.86	1178.58	1459.66	1166.62	1229.95	BTK
ENSG00000010803	-0.141854	0.262033	0.627808	2854.73	3300.39	3208.34	3892.42	3380.42	3226.96	SCMH1
ENSG00000010810	0.383442	0.00660695	0.0914677	493.09	375.935	444.653	325.943	473.294	380.201	FYN
ENSG00000010818	0.952455	0.0194916	0.16999	2782.28	1345.76	3063.71	872.016	2932.27	2318.28	HIVEP2
ENSG00000011007	0.290519	0.0663309	0.32403	3901.47	3126.26	4103.51	2607.54	3995.61	4077.66	ELOA
ENSG00000011009	0.120875	0.285466	0.654581	1109.45	1034.4	1207.89	1053.41	1160.33	1110.19	LYPLA2
ENSG00000104093	1.40938	3.55829e-10	1.58344e-06	3926.34	1382.66	3626.61	822.888	3324.74	1889.6	DMXL2
ENSG00000011028	-0.116674	0.296498	0.664135	9347.09	9593.26	9550.76	11146.3	10322.7	10941.2	MRC2
ENSG00000011052	0.115743	0.679942	0.900697	58.3923	68.0373	70.3627	50.0724	52.0893	49.4262	NME1-NME2
ENSG00000011105	0.162801	0.643681	0.882507	48.6602	29.9826	32.2496	34.9562	28.7389	32.3171	TSPAN9
ENSG00000011114	-0.438795	0.00264173	0.0529661	1294.36	1613.29	1120.92	1792.21	1077.71	1327.85	BTBD7
ENSG00000011132	0.452807	0.016602	0.155534	373.062	292.906	472.017	271.147	487.664	409.667	APBA3
ENSG00000011143	0.335289	0.105625	0.408958	158.957	119.93	198.384	167.223	219.134	169.19	MKS1
ENSG00000011198	0.0492401	0.822073	0.950682	206.536	169.517	185.679	136.991	137.408	204.358	ABHD5
ENSG00000106341	1.40189	0.00191376	0.0432296	47.5789	26.523	44.954	5.66857	35.9237	17.1091	PPP1R17
ENSG00000011243	-0.0530564	0.663012	0.892744	1018.62	1041.32	948.919	1125.21	1062.44	977.117	AKAP8L
ENSG00000011258	-0.295873	0.05666	0.299332	456.325	445.126	402.631	583.863	381.689	491.41	MBTD1
ENSG00000011260	0.156319	0.179194	0.533983	1072.69	874.107	1031.01	973.105	1001.37	937.196	UTP18
ENSG00000011275	-0.132374	0.270966	0.637426	1438.18	1467.99	1192.26	1402.03	1281.58	1417.2	RNF216
ENSG00000011295	-0.163144	0.275901	0.642918	264.928	325.195	302.951	341.059	296.37	302.26	TTC19
ENSG00000011304	0.00188452	0.985071	0.997171	11676.3	12493.5	13099.2	12218.6	12327.2	12343.2	PTBP1
ENSG00000011332	-0.55664	0.230037	0.593478	11.8947	24.2167	31.2723	42.5143	17.0637	21.8616	DPF1
ENSG00000011376	0.131762	0.327477	0.692816	688.812	599.651	607.856	554.576	570.288	549.391	LARS2
ENSG00000011405	0.0355782	0.821417	0.9505	612.037	544.299	515.993	566.857	470.6	447.687	PIK3C2A
ENSG00000011422	-0.431534	0.0473973	0.27266	2050.22	3137.79	1413.12	2172.95	1639.92	1573.08	PLAUR
ENSG00000011426	-0.192049	0.193952	0.549855	1357.08	1378.04	1440.48	1933.93	1378.57	1457.12	ANLN
ENSG00000011451	0.129	0.275577	0.642641	1380.87	1318.08	1570.46	1429.43	1605.79	1420.05	WIZ
ENSG00000011454	0.128778	0.373381	0.727366	424.966	379.395	408.495	345.783	429.288	429.627	RABGAP1
ENSG00000011465	0.59802	0.330095	NA	11.8947	5.76588	15.6362	5.66857	11.6752	14.2575	DCN
ENSG00000011478	-0.463751	0.00947596	0.11438	204.373	320.583	218.906	336.335	224.523	237.626	QPCTL
ENSG00000011485	-0.0229924	0.837823	0.954265	1275.98	1349.21	1422.89	1433.2	1394.74	1377.28	PPP5C
ENSG00000011523	-0.0556032	0.81823	0.949197	73.531	69.1905	85.9989	78.4153	73.6435	94.0998	CEP68
ENSG00000011566	0.0889316	0.573104	0.854577	288.717	268.69	288.292	276.815	254.16	235.725	MAP4K3
ENSG00000011600	-0.0781439	0.63943	0.881287	2563.85	3107.81	2155.84	2030.29	2224.57	2194.71	TYROBP
ENSG00000011638	-0.24583	0.267542	0.633165	100.564	152.219	106.521	102.979	101.484	112.159	TMEM159
ENSG00000012048	0.0651244	0.607987	0.869472	1669.59	1420.71	1808.91	1761.04	1624.65	1693.8	BRCA1
ENSG00000012061	-0.127763	0.321155	0.687718	960.228	1044.78	861.943	942.873	818.162	897.275	ERCC1
ENSG00000012171	-0.386749	0.206337	0.566209	43.2535	59.9651	41.0449	51.0172	33.2294	42.7726	SEMA3B
ENSG00000012174	-0.0376656	0.808754	0.945991	386.038	355.178	312.723	393.021	345.765	323.171	MBTPS2
ENSG00000012211	-0.0215629	0.898181	0.976443	240.057	262.924	257.019	241.859	298.167	303.211	PRICKLE3
ENSG00000012232	-0.0647891	0.622978	0.8737	663.942	643.472	691.9	775.65	641.238	668.204	EXTL3
ENSG00000012660	0.154146	0.165705	0.51518	4449.71	4204.48	4268.67	3630.72	4125.83	3708.86	ELOVL5
ENSG00000012779	-0.297334	0.0365859	0.237393	918.056	1048.24	849.239	1067.58	1028.32	1319.3	ALOX5
ENSG00000012817	0.2801	0.041025	0.251693	1287.87	994.037	1262.62	1041.13	1456.71	1264.17	KDM5D
ENSG00000012822	-0.28917	0.0471961	0.272189	446.593	492.406	435.858	632.046	485.868	546.539	CALCOCO1
ENSG00000117090	1.37475	3.14507e-05	0.00323333	128.679	41.5143	226.724	52.9067	192.192	115.961	SLAMF1
ENSG00000012983	-0.187794	0.214857	0.576783	542.832	608.876	487.653	597.09	449.046	479.054	MAP4K5
ENSG00000013275	0.216618	0.109019	0.41629	1841.52	1762.05	1972.11	1383.13	1957.84	1823.07	PSMC4
ENSG00000013288	-0.253553	0.0261219	0.198705	1825.3	2304.04	2041.5	2469.61	1951.55	2163.35	MAN2B2
ENSG00000013297	0.638921	0.3963	NA	3.24401	10.3786	7.81808	4.72381	29.637	11.406	CLDN11
ENSG00000013306	0.0714292	0.504894	0.815132	2652.52	2735.33	2660.1	2537.63	2779.59	2430.44	SLC25A39
ENSG00000013364	-0.0870826	0.462046	0.788528	1574.43	1789.73	1551.89	1734.58	1598.6	1496.09	MVP
ENSG00000013374	0.269478	0.0703448	0.335754	1570.1	1329.61	1747.34	1193.23	1762.95	1691.9	NUB1
ENSG00000013375	-0.225929	0.0916685	0.385334	448.755	492.406	447.585	533.791	475.091	576.955	PGM3
ENSG00000013392	0.00620372	0.985258	0.997171	47.5789	31.1357	33.2268	56.6857	54.7836	46.5747	RWDD2A
ENSG00000013441	0.113732	0.614132	0.871978	1787.45	1298.48	1245.03	871.071	1033.7	1587.34	CLK1
ENSG00000013503	-0.201611	0.210457	0.570533	224.918	252.545	239.429	300.434	232.606	248.081	POLR3B
ENSG00000013523	-0.0112808	0.944148	0.988106	244.382	251.392	257.997	254.141	220.931	223.368	ANGEL1
ENSG00000013561	0.0434497	0.76275	0.9318	684.487	649.238	765.195	691.566	796.608	838.344	RNF14
ENSG00000013563	0.00550011	0.970074	0.99378	322.239	284.834	298.064	316.495	308.046	322.221	DNASE1L1
ENSG00000013573	0.0633456	0.655017	0.888124	604.468	578.894	673.332	717.075	721.168	616.877	DDX11
ENSG00000013583	-0.197594	0.23742	0.602678	177.339	214.491	171.998	191.787	185.007	207.21	HEBP1
ENSG00000013725	-0.269779	0.49149	0.806776	24.8708	40.3611	28.3405	37.7905	26.9428	19.0101	CD6
ENSG00000280128	1.37188	0.000483822	0.0187951	40.0095	24.2167	39.0904	13.2267	50.2931	13.307	AL662795.1
ENSG00000014123	-0.152692	0.203693	0.562692	626.095	669.995	590.265	693.456	613.397	670.105	UFL1
ENSG00000014138	-0.0367553	0.771558	0.934301	631.501	631.94	698.741	693.456	617.887	672.006	POLA2
ENSG00000014164	-0.144133	0.303597	0.670847	679.08	738.032	647.923	839.894	679.856	639.689	ZC3H3
ENSG00000014216	-0.102639	0.380937	0.731728	3229.96	3582.91	3612.93	4117.27	3638.17	3553.93	CAPN1
ENSG00000253477	1.36539	0.00211269	0.0459559	22.7081	18.4508	57.6583	11.3371	39.516	17.1091	AC012213.1
ENSG00000014641	-0.0381311	0.704105	0.909952	3628.97	3641.73	3772.22	3779.99	3641.76	3916.07	MDH1
ENSG00000014824	-0.136154	0.23891	0.604115	1553.88	1621.36	1495.21	1604.21	1324.69	1579.74	SLC30A9
ENSG00000014914	-0.0289397	0.856926	0.960796	464.975	471.649	349.859	393.021	415.817	391.607	MTMR11
ENSG00000014919	0.0743532	0.664256	0.893442	419.559	377.088	551.175	486.553	501.135	533.232	COX15
ENSG00000015133	0.0665201	0.770123	0.934188	138.411	132.615	187.634	213.516	184.109	140.674	CCDC88C
ENSG00000015153	-0.174802	0.311317	0.679541	166.526	201.806	202.293	198.4	185.905	226.22	YAF2
ENSG00000015171	-0.0624627	0.597192	0.86666	1118.1	1118.58	1130.69	1229.14	1038.19	1083.57	ZMYND11
ENSG00000015285	-0.085735	0.473903	0.797656	1480.35	1808.18	1544.07	1624.05	1709.07	1593.99	WAS
ENSG00000015475	0.261251	0.0638176	0.317976	3681.96	3157.39	3747.79	2490.39	3566.32	3527.32	BID
ENSG00000015479	0.0296979	0.864115	0.962798	185.99	191.427	199.361	185.173	170.637	168.239	MATR3
ENSG00000015520	0.31142	0.607085	NA	10.8134	8.07223	20.5225	9.44762	7.18474	13.307	NPC1L1
ENSG00000015532	0.0251974	0.91415	0.980431	118.947	89.9477	112.385	151.162	144.593	127.367	XYLT2
ENSG00000015676	0.0256135	0.836403	0.953649	843.444	777.24	734.899	809.661	854.984	803.175	NUDCD3
ENSG00000016864	-0.191058	0.16296	0.511126	339.54	401.305	371.359	394.911	339.479	403.013	GLT8D1
ENSG00000233251	1.33198	0.000336997	0.0147505	55.1482	27.6762	92.8397	16.061	81.7264	47.5252	AC007743.1
ENSG00000017483	0.0510628	0.716266	0.914392	411.99	403.611	485.698	430.812	441.861	458.143	SLC38A5
ENSG00000017797	-0.162137	0.195745	0.552356	1484.68	1583.31	1674.05	1951.88	1571.66	1756.53	RALBP1
ENSG00000018189	0.196794	0.405346	0.75231	84.3444	63.4246	93.817	88.8077	95.1977	85.5453	RUFY3
ENSG00000018236	-0.278178	0.441459	0.774497	34.6028	34.5953	38.1131	51.9619	24.2485	30.4161	CNTN1
ENSG00000018280	-0.396984	0.0853141	0.370268	90.8324	130.309	70.3627	106.758	92.5035	97.9018	SLC11A1
ENSG00000018408	-0.249711	0.465184	0.791578	24.8708	40.3611	37.1359	45.3486	36.8218	32.3171	WWTR1
ENSG00000018510	0.121787	0.33298	0.697867	1851.25	1570.62	1674.05	1590.98	1488.14	1444.76	AGPS
ENSG00000018610	-0.159338	0.248196	0.613823	411.99	505.091	442.699	428.922	411.326	480.955	CXorf56
ENSG00000018625	0.316331	0.640135	NA	3.24401	10.3786	13.6816	12.2819	17.9618	5.70302	ATP1A2
ENSG00000018699	0.109364	0.496548	0.809872	503.904	541.992	600.038	408.137	478.683	518.024	TTC27
ENSG00000018869	0.541308	0.143894	0.480727	31.3588	33.4421	40.0677	21.7295	36.8218	19.9606	ZNF582
ENSG00000019102	-0.198465	0.371968	0.725565	80.019	106.092	85.9989	87.8629	83.5226	93.1493	VSIG2
ENSG00000019144	-0.119178	0.497648	0.810196	405.502	405.918	415.335	533.791	548.734	547.49	PHLDB1
ENSG00000019169	-0.323215	0.329257	0.693637	27.0335	44.9738	32.2496	36.8457	35.9237	38.0201	MARCO
ENSG00000019485	-0.0927061	0.750398	0.925763	49.7416	44.9738	40.0677	57.6305	55.6817	52.2777	PRDM11
ENSG00000019549	-0.355304	0.400589	0.748688	15.1387	26.523	22.477	20.7848	28.7389	38.0201	SNAI2
ENSG00000019582	-0.14103	0.378581	0.729828	2292.44	2904.85	2050.29	1985.89	1957.84	2058.79	CD74
ENSG00000019991	-0.508241	0.0971699	0.395346	36.7655	49.5865	45.9312	68.9677	35.0256	48.4757	HGF
ENSG00000019995	0.0218953	0.888099	0.972531	341.703	309.051	279.496	317.44	298.167	278.497	ZRANB1
ENSG00000055813	1.27842	5.12221e-08	2.97311e-05	141.655	57.6588	196.429	79.36	205.663	86.4958	CCDC85A
ENSG00000020181	-0.117049	0.421224	0.76197	4306.97	4312.87	3578.73	4693.58	3590.57	3438.92	ADGRA2
ENSG00000020256	-0.322552	0.157908	0.503239	111.378	125.696	125.089	193.676	116.752	121.664	ZFP64
ENSG00000020426	-0.00466655	0.973648	0.994508	416.315	378.241	350.836	380.739	385.281	396.36	MNAT1
ENSG00000020577	0.0325573	0.941626	0.988106	27.0335	31.1357	19.5452	12.2819	31.4332	33.2676	SAMD4A
ENSG00000020633	-1.16923	0.00272286	0.0536902	1024.03	2180.65	730.99	2490.39	792.117	1056.96	RUNX3
ENSG00000020922	-0.177277	0.16437	0.512816	616.363	636.553	601.992	654.72	550.53	707.174	MRE11
ENSG00000021300	-0.350949	0.257622	0.624752	28.1148	53.0461	47.8857	50.0724	46.7008	54.1787	PLEKHB1
ENSG00000021355	-0.432595	0.0157129	0.15037	932.114	1333.07	703.627	908.861	718.474	936.246	SERPINB1
ENSG00000021574	-0.435737	0.00540763	0.0818502	241.138	291.753	221.838	342.004	223.625	293.705	SPAST
ENSG00000100024	1.19584	0.000282445	0.0132303	63.799	36.9016	83.0671	23.6191	108.669	51.3272	UPB1
ENSG00000021776	0.0210528	0.849714	0.958999	1420.88	1297.32	1354.48	1329.28	1285.17	1373.48	AQR
ENSG00000021826	0.367986	0.481609	NA	14.0574	12.6849	19.5452	7.5581	20.6561	21.8616	CPS1
ENSG00000022267	-0.0296741	0.855763	0.960562	269.253	295.213	232.588	249.417	286.491	261.388	FHL1
ENSG00000022277	-0.0506968	0.650437	0.886489	2714.16	2809.13	2446.08	2528.18	2453.59	2549.25	RTF2
ENSG00000022556	-0.144667	0.574568	0.855127	62.7176	78.4159	95.7715	101.09	71.8474	75.0898	NLRP2
ENSG00000022567	-0.163573	0.365783	0.721513	337.378	374.782	413.381	548.907	437.371	406.815	SLC45A4
ENSG00000022840	0.146497	0.178513	0.533174	3155.34	2839.12	3024.62	2551.8	3015.79	2917.09	RNF10
ENSG00000022976	0.105752	0.547209	0.840739	183.827	159.138	173.952	170.057	199.376	188.2	ZNF839
ENSG00000159200	1.19385	0.00150074	0.0374722	7531.52	3191.99	9390.49	2452.6	8778.85	5589.91	RCAN1
ENSG00000023171	-0.478182	0.00522559	0.0797275	325.483	403.611	244.315	473.326	334.988	383.053	GRAMD1B
ENSG00000023191	-0.0100823	0.919929	0.981635	6009	6559.26	6367.83	6269.44	6516.56	6199.18	RNH1
ENSG00000023228	-0.171111	0.137495	0.470054	1758.26	1780.5	1690.66	2053.91	1604.89	1853.48	NDUFS1
ENSG00000023287	-0.296169	0.0116916	0.127622	1163.52	1331.92	1094.53	1466.27	1067.83	1284.13	RB1CC1
ENSG00000023318	-0.0259689	0.811141	0.946518	2292.44	2387.07	2326.86	2199.41	2106.03	2261.25	ERP44
ENSG00000023330	-0.0932603	0.485051	0.803603	3984.73	4333.63	4784.66	5459.78	4796.71	4678.38	ALAS1
ENSG00000023445	0.145525	0.367128	0.722033	2475.18	2081.48	2123.59	1555.08	1938.08	2272.65	BIRC3
ENSG00000023516	0.170492	0.260935	0.627263	736.391	582.353	799.399	806.827	735.537	627.332	AKAP11
ENSG00000023572	0.277388	0.109805	0.417746	205.454	161.445	229.656	171.947	212.848	200.556	GLRX2
ENSG00000023608	0.449492	0.015178	0.148119	504.985	418.603	595.151	307.993	588.25	510.42	SNAPC1
ENSG00000023697	-0.244245	0.125007	0.447892	238.976	322.889	295.132	342.004	314.332	341.231	DERA
ENSG00000023734	0.105225	0.444473	0.775041	1765.83	1698.63	1550.91	1346.29	1466.58	1402.94	STRAP
ENSG00000023839	-0.449753	0.332169	NA	10.8134	18.4508	18.5679	19.84	15.2676	22.8121	ABCC2
ENSG00000023892	-0.385373	0.0073087	0.0983577	1299.77	1606.37	1194.21	1990.61	1385.76	1470.43	DEF6
ENSG00000023902	-0.400028	0.0785082	0.355154	576.353	759.942	343.995	539.459	393.364	434.38	PLEKHO1
ENSG00000023909	0.0827542	0.70054	0.909519	4502.69	4141.05	4829.62	3019.46	5126.31	6491.94	GCLM
ENSG00000024048	0.198332	0.112151	0.42342	1088.91	840.665	1117.01	990.111	1059.75	1013.24	UBR2
ENSG00000024422	-0.0219923	0.902346	0.977863	259.521	343.646	293.178	315.551	336.784	246.18	EHD2
ENSG00000024526	-0.199329	0.247261	0.612806	302.775	340.187	377.222	471.436	390.67	417.271	DEPDC1
ENSG00000024862	-0.322355	0.0203522	0.17339	351.435	450.891	340.086	467.657	395.16	441.033	CCDC28A
ENSG00000025039	-0.252142	0.108176	0.414701	404.42	522.388	348.882	469.547	409.53	394.459	RRAGD
ENSG00000025156	0.284458	0.0533761	0.290371	600.143	472.802	656.719	524.343	511.014	453.39	HSF2
ENSG00000025293	0.0546911	0.636069	0.880042	1005.64	961.748	998.76	916.42	916.054	933.394	PHF20
ENSG00000025423	0.139979	0.722975	0.91579	23.7894	26.523	38.1131	25.5086	21.5542	23.7626	HSD17B6
ENSG00000025434	0.0988926	0.596989	0.86666	182.746	169.517	181.77	206.903	237.994	186.299	NR1H3
ENSG00000025708	0.0658276	0.683558	0.902535	1493.33	1446.08	1258.71	1168.67	1700.09	1639.62	TYMP
ENSG00000025770	-0.0923929	0.378231	0.72968	1653.37	1725.15	1632.02	1770.48	1704.58	1824.02	NCAPH2
ENSG00000025772	0.168969	0.326957	0.692621	404.42	327.502	515.016	461.989	475.091	449.588	TOMM34
ENSG00000025796	-0.0326607	0.757949	0.929861	6112.8	5929.63	6074.65	5900.99	5395.74	6153.56	SEC63
ENSG00000025800	-0.0439455	0.686839	0.903423	1898.83	1891.21	1864.61	1808.28	1762.06	1996.06	KPNA6
ENSG00000026025	-0.33436	0.0030222	0.0576938	7827.81	10721.1	7430.11	9620.52	8712.39	9883.33	VIM
ENSG00000026036	0.297434	0.22755	0.590751	83.263	57.6588	84.0444	72.7467	98.7901	85.5453	RTEL1-TNFRSF6B
ENSG00000026103	0.126828	0.783407	NA	15.1387	11.5318	22.477	25.5086	26.9428	21.8616	FAS
ENSG00000026297	-0.114556	0.278591	0.64704	5204.48	6094.53	5399.36	5609.05	5137.09	5339.93	RNASET2
ENSG00000137877	1.17547	0.000275244	0.0129384	87.5884	39.208	48.863	30.2324	92.5035	32.3171	SPTBN5
ENSG00000026559	0.475883	0.00488754	0.0765669	650.966	536.226	625.446	346.728	586.454	458.143	KCNG1
ENSG00000026652	0.428987	0.0230303	0.186676	621.769	518.929	521.857	307.993	519.097	409.667	AGPAT4
ENSG00000026751	1.21424	0.0285346	0.207204	2037.24	968.667	2014.13	309.882	1801.57	1244.21	SLAMF7
ENSG00000026950	-0.019374	0.955026	0.990334	38.9282	28.8294	40.0677	35.901	27.8409	42.7726	BTN3A1
ENSG00000027001	-0.147214	0.481644	0.802373	141.655	141.841	108.476	118.095	106.873	134.971	MIPEP
ENSG00000027075	-0.0767916	0.579188	0.85818	365.492	364.403	341.064	378.85	337.683	357.389	PRKCH
ENSG00000027644	1.29331	0.00920716	NA	29.1961	4.6127	22.477	12.2819	26.0447	14.2575	INSRR
ENSG00000027697	-0.394932	0.00878016	0.109445	1647.96	2087.25	1258.71	2017.07	1427.07	1593.99	IFNGR1
ENSG00000027847	-0.144939	0.353175	0.71136	219.512	262.924	233.565	252.252	224.523	234.774	B4GALT7
ENSG00000027869	-0.16193	0.448893	0.778606	169.77	157.985	151.475	234.301	222.727	215.764	SH2D2A
ENSG00000028116	-0.270776	0.0320014	0.220655	462.813	561.596	463.221	588.587	490.358	558.896	VRK2
ENSG00000028137	-0.561693	0.00421182	0.070197	1147.3	1635.2	860.966	1809.22	1024.72	1032.25	TNFRSF1B
ENSG00000028203	0.06499	0.66859	0.895248	402.258	407.071	476.903	365.623	402.345	452.44	VEZT
ENSG00000028277	0.759876	0.0598269	0.306978	1594.97	958.288	1967.22	669.837	2026.1	1671.94	POU2F2
ENSG00000028310	-0.182778	0.0816003	0.362638	2982.33	3528.72	2967.94	3536.25	3096.62	3205.1	BRD9
ENSG00000028528	0.212478	0.0743744	0.346107	1727.98	1409.18	1791.32	1399.19	1598.6	1607.3	SNX1
ENSG00000028839	0.180135	0.314257	0.681834	284.392	252.545	242.36	188.952	271.224	263.289	TBPL1
ENSG00000029153	0.22404	0.130507	0.458855	370.899	304.438	413.381	325.943	387.078	371.647	ARNTL2
ENSG00000029363	-0.345087	0.0238181	0.189328	6903.26	7772.4	5411.09	8041.82	5050.87	6241.95	BCLAF1
ENSG00000029364	-0.186346	0.155171	0.49824	2036.16	2050.35	1739.52	2047.3	1544.72	1954.23	SLC39A9
ENSG00000029534	-0.464449	0.200851	0.559317	21.6268	40.3611	50.8175	68.9677	40.4141	46.5747	ANK1
ENSG00000029639	0.351145	0.111734	0.422203	135.167	87.6413	162.225	113.371	119.446	124.516	TFB1M
ENSG00000029725	0.300473	0.0160051	0.152077	937.52	694.211	886.375	701.014	797.506	731.887	RABEP1
ENSG00000166348	1.1739	1.13481e-06	0.000297054	694.219	328.655	1174.67	337.28	1007.66	608.322	USP54
ENSG00000030066	0.00102959	0.992794	0.998478	1778.8	1778.2	1963.32	2018.01	1877.91	1819.26	NUP160
ENSG00000030110	0.0697775	0.587727	0.861943	796.946	723.041	809.171	755.81	683.448	701.471	BAK1
ENSG00000030582	-0.132528	0.3053	0.672567	10104	12710.3	9878.14	10175.1	9693.11	9647.61	GRN
ENSG00000031003	-0.246698	0.0932951	0.388149	1416.55	1499.13	1220.6	1659	1101.06	1275.58	FAM13B
ENSG00000031081	-0.173774	0.446508	0.776763	834.793	869.494	429.994	545.128	669.078	767.056	ARHGAP31
ENSG00000031691	0.00748311	0.960363	0.991252	346.028	325.195	306.86	292.876	292.778	322.221	CENPQ
ENSG00000031698	0.151792	0.280283	0.648225	2558.45	2347.86	2092.31	1780.88	2238.94	2074	SARS
ENSG00000031823	-0.320195	0.00838917	0.106459	907.243	1210.83	885.397	1197.01	1022.93	1109.24	RANBP3
ENSG00000032219	-0.244726	0.1639	0.511967	321.157	345.953	360.609	473.326	296.37	338.379	ARID4A
ENSG00000032389	-0.160399	0.271495	0.638082	607.712	726.5	632.287	795.49	648.422	589.312	EIPR1
ENSG00000032444	-0.0162953	0.885469	0.971563	1828.54	1975.39	2059.09	2106.82	2035.08	1908.61	PNPLA6
ENSG00000032742	0.0842522	0.619161	0.873364	184.909	190.274	212.065	205.958	220.033	186.299	IFT88
ENSG00000033011	-0.150651	0.32602	0.692501	282.229	340.187	358.654	369.402	309.842	345.983	ALG1
ENSG00000033030	0.252466	0.0769051	0.351483	522.286	463.576	510.13	371.292	501.135	453.39	ZCCHC8
ENSG00000033050	0.406307	0.00292115	0.0564361	2292.44	1732.07	2125.54	1357.62	1965.03	1727.06	ABCF2
ENSG00000033100	-0.0954696	0.430441	0.768046	1304.09	1388.42	1269.46	1488	1507.9	1484.69	CHPF2
ENSG00000033170	-0.0704322	0.56503	0.85088	949.415	992.884	844.353	912.64	969.939	997.078	FUT8
ENSG00000033178	0.210635	0.091515	0.385159	1039.17	781.853	1017.33	903.193	986.105	941.949	UBA6
ENSG00000033327	-0.347109	0.026495	0.199835	582.841	695.365	434.881	668.892	496.645	561.747	GAB2
ENSG00000033627	0.0352418	0.789635	0.94193	741.798	804.916	813.08	847.452	869.353	714.778	ATP6V0A1
ENSG00000033800	-0.225777	0.0471615	0.272189	1032.68	1176.24	997.782	1235.75	985.207	1113.99	PIAS1
ENSG00000172817	1.16838	6.42744e-06	0.00111437	135.167	59.9651	175.907	51.9619	163.453	98.8523	CYP7B1
ENSG00000034053	-0.394378	0.0221224	0.18208	615.281	733.419	573.652	978.774	583.76	616.877	APBA2
ENSG00000034152	0.172028	0.173988	0.527656	1163.52	1143.95	1152.19	918.309	1201.65	1061.71	MAP2K3
ENSG00000034510	-0.059721	0.672174	0.897416	7635.33	8611.91	6920.95	6183.47	7466.74	8160.07	TMSB10
ENSG00000034533	0.161136	0.500575	0.812649	224.918	175.283	123.135	127.543	155.37	147.328	ASTE1
ENSG00000034677	0.161119	0.232108	0.596122	1051.06	845.277	1174.67	1076.08	1052.56	1008.48	RNF19A
ENSG00000034693	-0.0999313	0.620104	0.873446	179.502	172.976	147.566	175.726	129.325	139.724	PEX3
ENSG00000034713	0.137171	0.225158	0.588002	1446.83	1359.59	1518.66	1257.48	1357.92	1314.55	GABARAPL2
ENSG00000035115	0.117574	0.444666	0.775075	241.138	221.41	255.065	231.467	246.975	231.923	SH3YL1
ENSG00000035141	-0.0786666	0.530565	0.831699	715.846	853.35	852.171	801.159	780.442	826.938	FAM136A
ENSG00000035403	0.0509368	0.634155	0.879042	2370.29	2111.46	2274.08	2368.52	2335.94	2256.49	VCL
ENSG00000035499	-0.179072	0.299778	0.667229	408.746	427.828	538.47	590.476	480.479	596.916	DEPDC1B
ENSG00000035664	-0.430607	0.196607	0.553618	29.1961	34.5953	27.3633	42.5143	33.2294	43.7231	DAPK2
ENSG00000035681	0.201495	0.17075	0.523298	7441.77	6605.39	6434.28	4727.59	6182.46	6111.74	NSMAF
ENSG00000035687	-0.0728921	0.538955	0.836355	755.855	770.321	803.308	823.833	750.805	834.542	ADSS
ENSG00000035720	-0.213536	0.719433	NA	10.8134	5.76588	9.7726	15.1162	19.758	25.6636	STAP1
ENSG00000035862	-0.319829	0.0157101	0.15037	1399.25	1988.07	1404.32	1794.1	1427.97	1501.8	TIMP2
ENSG00000035928	-0.217114	0.102166	0.401667	1440.34	1518.73	1347.64	1844.18	1334.56	1427.66	RFC1
ENSG00000036054	0.00564077	0.969481	0.993519	1026.19	911.008	879.534	820.054	740.028	902.978	TBC1D23
ENSG00000036257	-0.136058	0.197925	0.555482	1499.82	1664.03	1510.84	1714.74	1519.57	1599.7	CUL3
ENSG00000036530	-0.258746	0.565538	NA	18.3827	16.1445	13.6816	22.6743	25.1466	29.4656	CYP46A1
ENSG00000036549	0.0151437	0.913754	0.980431	925.625	811.835	954.783	1001.45	798.404	835.492	AC118549.1
ENSG00000036565	-0.00670899	0.989931	NA	8.65071	11.5318	18.5679	15.1162	13.4714	14.2575	SLC18A1
ENSG00000036672	-0.183515	0.451301	0.780393	95.1578	96.8667	83.0671	136.991	103.281	85.5453	USP2
ENSG00000037042	-0.166178	0.409999	0.755068	98.4018	125.696	125.089	134.156	119.446	125.466	TUBG2
ENSG00000037241	0.115325	0.459231	0.786294	539.588	473.955	446.608	387.353	418.511	435.33	RPL26L1
ENSG00000037280	0.559502	0.320811	NA	8.65071	11.5318	24.4315	11.3371	14.3695	9.50503	FLT4
ENSG00000037474	0.0456961	0.692327	0.905424	6950.84	6758.76	6355.12	6072.93	5986.68	5859.85	NSUN2
ENSG00000037637	0.260511	0.0372111	0.238935	798.028	611.183	799.399	639.604	737.333	696.719	FBXO42
ENSG00000037749	0.240391	0.146882	0.486437	414.153	315.97	345.95	296.655	299.065	283.25	MFAP3
ENSG00000037757	-0.0554444	0.711478	0.913321	289.799	356.331	324.45	305.158	326.007	317.468	MRI1
ENSG00000037897	0.0642569	0.700262	0.909458	427.129	536.226	538.47	409.082	441.861	403.013	METTL1
ENSG00000038002	-0.0520471	0.699373	0.908763	482.277	448.585	443.676	478.995	471.498	519.925	AGA
ENSG00000038210	0.372636	0.0409536	0.251576	2356.24	1914.27	2199.81	1190.4	1760.26	1774.59	PI4K2B
ENSG00000038219	-0.146902	0.26441	0.629885	1908.56	1802.41	1738.55	2227.75	1642.61	1824.02	BOD1L1
ENSG00000038274	0.0939392	0.406285	0.75313	955.903	932.919	972.374	894.69	1017.54	933.394	MAT2B
ENSG00000038358	0.0165018	0.877546	0.968427	2014.53	1850.85	1934.97	2055.8	1979.39	1953.28	EDC4
ENSG00000038382	0.277561	0.190723	0.545917	130.842	109.552	112.385	116.206	138.306	89.3473	TRIO
ENSG00000038427	0.0576449	0.727092	0.917548	1538.74	1240.82	962.601	1204.57	1276.19	1183.38	VCAN
ENSG00000038532	0.12992	0.312223	0.679963	659.616	574.281	657.696	658.499	649.32	563.648	CLEC16A
ENSG00000038945	-0.547516	0.202161	NA	22.7081	28.8294	20.5225	18.8952	14.3695	36.1191	MSR1
ENSG00000039123	0.069352	0.528635	0.830701	2551.96	2313.27	2469.54	2377.02	2240.74	2229.88	MTREX
ENSG00000039319	0.361177	0.0580352	0.303118	841.281	684.986	647.923	411.916	661.894	578.856	ZFYVE16
ENSG00000039523	-0.301754	0.230594	0.59413	60.5549	80.7223	79.1581	104.869	70.9493	74.1393	RIPOR1
ENSG00000039560	-0.184334	0.185344	0.539292	426.047	469.342	364.518	470.492	421.205	437.231	RAI14
ENSG00000039650	0.0187386	0.889116	0.973086	634.746	586.966	610.787	629.212	697.817	701.471	PNKP
ENSG00000040199	0.142329	0.598009	0.86666	64.8803	46.127	69.3855	59.52	61.9683	71.2877	PHLPP2
ENSG00000040275	-0.16208	0.166498	0.516306	742.879	809.529	759.331	825.722	749.009	883.017	SPDL1
ENSG00000040341	0.0323067	0.766757	0.933315	1350.59	1300.78	1406.28	1337.78	1292.35	1320.25	STAU2
ENSG00000042832	1.16796	1.9665e-05	0.00230287	101.646	39.208	80.1353	36.8457	111.363	54.1787	TG
ENSG00000040531	-0.357146	0.0960714	0.393663	161.119	194.887	100.658	173.836	157.166	168.239	CTNS
ENSG00000040608	0.371373	0.432396	NA	19.4641	13.8381	18.5679	17.9505	17.9618	11.406	RTN4R
ENSG00000040633	0.138057	0.427709	0.76564	165.445	166.057	179.816	155.886	178.72	154.932	PHF23
ENSG00000040933	-0.380572	0.0245059	0.192675	528.774	695.365	590.265	875.795	525.384	569.351	INPP4A
ENSG00000041353	0.399488	0.112976	0.424495	410.909	289.447	384.063	177.615	406.836	443.885	RAB27B
ENSG00000041357	0.0257875	0.838622	0.954694	3111.01	3164.31	3070.55	2574.48	3040.94	3321.06	PSMA4
ENSG00000041802	0.127617	0.302365	0.669416	1216.51	1158.94	1220.6	973.105	1154.05	1155.81	LSG1
ENSG00000041880	0.0334894	0.887478	0.97215	78.9377	83.0286	117.271	102.979	90.7073	94.0998	PARP3
ENSG00000041982	0.89984	0.00865835	0.108432	125.435	65.731	83.0671	24.5638	79.9302	64.6342	TNC
ENSG00000041988	0.389952	0.168125	0.519072	130.842	83.0286	141.703	68.0229	132.918	157.784	THAP3
ENSG00000042062	-0.283509	0.52133	NA	18.3827	19.604	13.6816	25.5086	20.6561	19.0101	RIPOR3
ENSG00000042088	-0.286187	0.0641058	0.31862	386.038	396.692	373.313	538.515	404.141	481.905	TDP1
ENSG00000042286	-0.0135329	0.941364	0.988106	429.291	432.441	536.516	469.547	572.085	650.144	AIFM2
ENSG00000042317	-0.425091	0.0828909	0.365328	62.7176	76.1096	54.7266	84.0839	60.1722	77.9413	SPATA7
ENSG00000042429	0.0973794	0.563039	0.849617	614.2	545.452	527.72	410.027	457.129	538.935	MED17
ENSG00000042445	-0.256839	0.201659	0.56063	135.167	131.462	105.544	161.554	123.937	141.625	RETSAT
ENSG00000042493	-0.0628753	0.577735	0.857164	10556	11810.8	10262.2	10278.1	9808.96	9904.24	CAPG
ENSG00000042753	-0.0629015	0.610511	0.870327	1857.74	2164.51	2056.15	1882.91	2128.48	2266	AP2S1
ENSG00000242741	1.12485	0.00105619	0.0307863	84.3444	46.127	52.772	20.7848	69.1531	28.5151	LINC02005
ENSG00000042980	0.26904	0.269001	0.634706	195.722	171.823	132.907	94.4762	160.758	140.674	ADAM28
ENSG00000043093	0.0717953	0.580185	0.858539	737.473	701.13	754.445	633.936	726.556	775.611	DCUN1D1
ENSG00000043143	0.509579	0.0125582	0.132114	769.913	560.443	1185.42	705.738	1156.74	919.137	JADE2
ENSG00000043355	0.18266	0.192774	0.547961	935.358	900.63	1227.44	1041.13	1110.04	941.949	ZIC2
ENSG00000168062	1.11813	0.0014796	0.0372691	48.6602	35.7484	103.59	26.4533	97.892	53.2282	BATF2
ENSG00000043514	0.0285636	0.798885	0.944101	1094.31	1097.82	1200.08	1145.05	1131.6	1115.89	TRIT1
ENSG00000043591	-0.0612549	0.718393	0.914845	2668.74	2677.67	2747.08	3662.84	2776.9	2207.07	ADRB1
ENSG00000044090	0.129579	0.412662	0.757079	595.817	512.01	601.992	671.726	757.99	603.57	CUL7
ENSG00000044115	-0.0835257	0.428577	0.766529	4490.8	4528.52	3986.24	4485.73	4095.3	4306.73	CTNNA1
ENSG00000044446	-0.0999948	0.480458	0.80169	522.286	518.929	482.766	616.93	585.556	568.401	PHKA2
ENSG00000044459	0.102018	0.443298	0.774686	994.831	881.026	921.556	832.336	789.423	806.977	CNTLN
ENSG00000044574	-0.18605	0.104924	0.407665	11832	13996.1	10436.2	11889.8	11374.3	12388.9	HSPA5
ENSG00000046604	-0.0890268	0.6262	0.874937	515.798	535.073	738.809	776.595	559.511	616.877	DSG2
ENSG00000046647	0.251536	0.191907	0.547208	151.387	114.164	129.976	117.151	138.306	120.714	GEMIN8
ENSG00000046651	-0.227136	0.106136	0.410344	381.712	423.215	364.518	487.497	387.976	416.32	OFD1
ENSG00000046653	-0.249889	0.444408	0.775029	30.2775	38.0548	48.863	44.4038	35.9237	54.1787	GPM6B
ENSG00000180914	1.105	0.00168065	0.0400036	85.4257	27.6762	110.43	30.2324	97.892	77.9413	OXTR
ENSG00000259834	1.10426	2.9421e-06	0.00061667	289.799	133.768	257.019	78.4153	196.682	134.021	AL365361.1
ENSG00000047230	0.110989	0.516977	0.823095	187.072	206.418	219.883	186.118	206.561	176.794	CTPS2
ENSG00000047249	-0.111624	0.416872	0.759311	632.583	641.165	582.447	590.476	505.626	626.382	ATP6V1H
ENSG00000047315	-0.141769	0.240371	0.60608	3341.33	3328.06	2921.03	3483.34	2737.38	3115.75	POLR2B
ENSG00000047346	-0.695064	0.00448439	0.0730081	73.531	96.8667	77.2035	159.665	78.134	113.11	FAM214A
ENSG00000047365	0.250645	0.287801	0.656441	120.029	100.326	107.499	69.9124	92.5035	98.8523	ARAP2
ENSG00000047410	0.124131	0.309151	0.676717	4461.6	3422.62	4271.6	4010.52	3975.85	4224.99	TPR
ENSG00000047578	0.114475	0.439884	0.774004	442.267	355.178	440.744	423.254	375.402	382.102	KIAA0556
ENSG00000047579	-0.365565	0.100934	0.399487	94.0764	100.326	95.7715	147.383	92.5035	115.011	DTNBP1
ENSG00000047597	-0.063549	0.70041	0.909491	249.789	231.788	206.202	221.074	211.95	244.279	XK
ENSG00000047621	-0.00475552	0.976009	0.994508	295.205	260.618	258.974	256.031	263.141	302.26	C12orf4
ENSG00000047634	0.615799	0.270856	NA	17.3014	11.5318	9.7726	10.3924	17.9618	7.60403	SCML1
ENSG00000047644	-0.0800685	0.631165	0.877944	249.789	265.23	314.678	334.446	301.759	315.567	WWC3
ENSG00000047662	0.303596	0.589438	NA	7.56937	12.6849	32.2496	17.9505	14.3695	13.307	FAM184B
ENSG00000047849	-0.0228862	0.829696	0.952443	2731.46	2780.3	2484.19	2639.67	2749.96	2673.77	MAP4
ENSG00000196611	1.10024	0.00159232	0.0385798	65.9616	35.7484	125.089	35.901	130.223	77.9413	MMP1
ENSG00000166886	1.08482	9.25702e-08	4.41361e-05	1446.83	774.934	2246.72	706.682	1907.55	1158.66	NAB2
ENSG00000048028	0.339809	0.134081	0.463965	154.631	102.633	126.067	130.377	122.141	84.5948	USP28
ENSG00000048052	0.0221436	0.858245	0.961342	1694.46	1616.75	1685.77	1816.78	1588.72	1459.02	HDAC9
ENSG00000048140	-0.0283466	0.825753	0.95123	834.793	840.665	744.672	776.595	722.964	730.937	TSPAN17
ENSG00000048162	0.131297	0.321332	0.687718	905.08	853.35	843.375	705.738	784.932	754.7	NOP16
ENSG00000048342	-0.4906	0.331985	NA	9.73204	14.9913	18.5679	22.6743	10.7771	17.1091	CC2D2A
ENSG00000183742	1.08349	0.00132411	0.0346606	91.9137	43.8207	66.4537	18.8952	66.4588	43.7231	MACC1
ENSG00000048405	0.0338702	0.831578	0.953027	1024.03	926	811.126	837.059	728.353	740.442	ZNF800
ENSG00000048471	0.192562	0.279545	0.648129	261.684	175.283	213.043	214.461	207.459	205.309	SNX29
ENSG00000048544	-0.0584203	0.606071	0.868927	1809.08	1873.91	1749.3	1709.08	1596.81	1785.05	MRPS10
ENSG00000048649	-0.218969	0.0997522	0.398233	1184.07	1130.11	1136.55	1427.54	1040.89	1351.62	RSF1
ENSG00000048707	0.187288	0.2414	0.606682	1256.51	883.332	901.034	998.614	922.34	821.235	VPS13D
ENSG00000110172	1.08319	1.1113e-06	0.000296716	1070.52	445.126	1121.89	331.612	960.958	710.976	CHORDC1
ENSG00000169435	1.08291	0.000549276	0.0203126	204.373	98.0199	235.52	49.1276	226.319	167.289	RASSF6
ENSG00000048991	-0.093045	0.441171	0.774442	763.425	756.483	780.831	844.618	724.76	817.433	R3HDM1
ENSG00000049089	-0.0152089	0.909338	0.980111	22248.5	22166.3	17797.9	18268.9	18368.7	18599.4	COL9A2
ENSG00000049130	-0.0934445	0.602946	0.868418	982.936	947.91	655.741	690.621	751.703	911.533	KITLG
ENSG00000049167	0.0868337	0.652133	0.887236	149.225	155.679	156.362	132.267	133.816	126.417	ERCC8
ENSG00000049192	0.226828	0.703807	NA	7.56937	8.07223	13.6816	8.50286	12.5733	12.3565	ADAMTS6
ENSG00000115339	1.0796	0.000511193	0.0193225	101.646	43.8207	92.8397	30.2324	56.5798	44.6737	GALNT3
ENSG00000049245	-0.0976519	0.490358	0.806769	1032.68	1173.93	909.829	885.242	916.952	1001.83	VAMP3
ENSG00000049246	-0.272695	0.301514	0.668617	70.287	83.0286	61.5674	95.421	64.6626	58.9312	PER3
ENSG00000049247	-0.151789	0.376105	0.729195	207.617	247.933	183.725	207.848	199.376	201.507	UTS2
ENSG00000049249	-0.0329936	0.904851	0.978044	348.191	437.053	239.429	164.389	301.759	309.864	TNFRSF9
ENSG00000049323	-0.289698	0.35535	0.712729	61.6363	77.2627	42.0222	42.5143	43.1084	59.8817	LTBP1
ENSG00000049449	0.304929	0.0343146	0.229509	3764.14	3027.08	3578.73	2327.89	3084.95	3086.28	RCN1
ENSG00000049540	-0.131202	0.871758	NA	0	11.5318	28.3405	12.2819	7.18474	15.2081	ELN
ENSG00000049541	-0.238417	0.033871	0.227797	908.324	1086.29	970.419	1144.11	938.506	1093.08	RFC2
ENSG00000049618	0.146981	0.268526	0.633987	2138.89	1816.25	2236.95	2353.4	2319.77	1876.29	ARID1B
ENSG00000049656	0.197329	0.0508443	0.282704	7161.7	6374.75	7899.19	6718.21	7491.88	6576.53	CLPTM1L
ENSG00000049759	0.102591	0.58885	0.862535	329.808	244.473	216.952	281.539	263.141	227.17	NEDD4L
ENSG00000049769	0.259917	0.216441	0.578682	318.995	226.022	188.611	202.179	226.319	184.398	PPP1R3F
ENSG00000049860	-0.0726631	0.622507	0.873664	2276.22	2407.83	1796.2	1834.73	1852.76	1989.4	HEXB
ENSG00000049883	0.00323454	0.990591	0.997742	72.4497	64.5778	109.453	114.316	112.261	114.06	PTCD2
ENSG00000050030	-0.22186	0.465348	0.791578	62.7176	44.9738	60.5901	102.979	66.4588	72.2382	NEXMIF
ENSG00000050130	-0.0724358	0.654163	0.887994	278.985	319.429	351.814	379.794	361.931	345.033	JKAMP
ENSG00000050165	-1.06697	0.0880361	NA	5.40669	9.2254	4.8863	19.84	10.7771	15.2081	DKK3
ENSG00000050327	-0.0132925	0.958757	0.991047	77.8563	65.731	55.7038	76.5258	71.8474	64.6342	ARHGEF5
ENSG00000112297	1.06646	3.09584e-05	0.00322886	381.712	184.508	504.266	140.77	486.766	329.825	CRYBG1
ENSG00000050393	-0.0530075	0.704095	0.909952	397.932	435.9	384.063	376.96	374.504	387.805	MCUR1
ENSG00000052795	1.06266	1.08003e-05	0.00158444	1170.01	543.145	971.396	271.147	825.346	606.421	FNIP2
ENSG00000050426	-0.0479041	0.722031	0.915657	534.181	541.992	607.856	641.494	588.25	604.52	LETMD1
ENSG00000050438	-0.336443	0.213325	0.574455	58.3923	59.9651	44.954	72.7467	51.1912	61.7827	SLC4A8
ENSG00000050555	0.0566096	0.748906	0.924923	191.397	198.346	169.066	166.278	197.58	172.992	LAMC3
ENSG00000050628	0.450464	0.182112	0.537154	47.5789	32.2889	34.2041	25.5086	41.3122	32.3171	PTGER3
ENSG00000050730	0.686306	0.0033856	0.0616613	2188.63	1325	1566.55	663.223	1333.67	1174.82	TNIP3
ENSG00000050748	-0.126663	0.277207	0.644948	1489	1636.36	1387.71	1599.48	1386.65	1419.1	MAPK9
ENSG00000050767	-0.230344	0.17314	0.5264	921.3	1085.14	706.559	911.696	714.881	751.848	COL23A1
ENSG00000050820	0.191015	0.263898	0.629874	357.923	367.863	442.699	393.966	538.855	412.518	BCAR1
ENSG00000051009	-0.0815099	0.572215	0.854577	528.774	552.371	486.675	595.2	505.626	461.945	FAM160A2
ENSG00000051108	-0.130494	0.421132	0.761908	918.056	953.676	666.491	751.086	698.716	794.621	HERPUD1
ENSG00000051128	-0.217143	0.0907395	0.382698	3579.23	4083.39	3485.89	4658.62	3481.9	3517.81	HOMER3
ENSG00000051180	-0.389321	0.00596487	0.086274	489.846	589.272	525.766	751.086	492.154	633.035	RAD51
ENSG00000051341	0.393532	0.00575061	0.0847358	790.458	541.992	903.965	675.505	826.245	699.57	POLQ
ENSG00000051382	-0.380354	0.0203028	0.17339	2722.81	3281.94	2160.72	3253.76	1982.09	2400.02	PIK3CB
ENSG00000051523	0.0779576	0.521999	0.824949	13142.6	14235.9	13404.1	11096.2	13863.8	12955.4	CYBA
ENSG00000051596	0.22849	0.075325	0.348173	903.999	724.194	973.351	881.463	909.767	771.809	THOC3
ENSG00000051620	-0.0839239	0.461422	0.787822	1924.78	2050.35	2038.56	2183.35	2195.83	2294.51	HEBP2
ENSG00000051825	-0.0658174	0.597361	0.86666	542.832	546.605	554.106	582.918	555.021	598.817	MPHOSPH9
ENSG00000052126	-0.0177645	0.951818	0.988857	41.0909	43.8207	59.6129	56.6857	48.497	50.3767	PLEKHA5
ENSG00000052723	-0.0578474	0.599042	0.866813	1614.44	1571.78	1516.71	1554.13	1460.3	1651.97	SIKE1
ENSG00000052749	0.352284	0.00288281	0.0560197	2013.45	1660.57	2029.77	1394.47	1904.85	1605.4	RRP12
ENSG00000106511	1.03682	0.00025347	0.0123497	211.942	94.5604	301.973	91.642	294.574	207.21	MEOX2
ENSG00000052802	-0.342957	0.0228979	0.185941	271.416	354.025	303.928	391.132	273.02	330.775	MSMO1
ENSG00000052841	0.0271653	0.851209	0.958999	2089.15	1968.47	1643.75	1667.51	1613.87	1611.1	TTC17
ENSG00000052850	-0.331417	0.256074	0.622476	72.4497	86.4881	82.0898	165.333	124.835	99.8028	ALX4
ENSG00000033867	1.02651	2.07462e-07	8.65507e-05	321.157	131.462	396.768	168.168	334.988	215.764	SLC4A7
ENSG00000053371	-0.0698999	0.599556	0.86718	1231.64	1265.03	1428.75	1571.14	1448.62	1476.13	AKR7A2
ENSG00000053372	0.163526	0.196649	0.553619	1906.4	1572.93	1708.25	1598.54	1536.64	1426.71	MRTO4
ENSG00000053438	0.658414	0.211681	NA	30.2775	26.523	28.3405	3.77905	26.0447	23.7626	NNAT
ENSG00000053501	-0.201615	0.114657	0.427682	459.569	565.056	479.835	561.189	509.218	540.836	USE1
ENSG00000053524	-0.0284311	0.896563	0.975637	140.574	198.346	144.634	135.101	159.86	122.615	MCF2L2
ENSG00000053747	0.333942	0.140178	0.474248	203.292	116.471	230.633	223.909	202.071	162.536	LAMA3
ENSG00000053770	0.0075294	0.950166	0.988857	695.3	649.238	652.81	674.56	644.83	657.748	AP5M1
ENSG00000053900	-0.0910319	0.466133	0.792117	692.056	699.977	654.764	782.263	687.938	684.362	ANAPC4
ENSG00000053918	-0.527249	0.00811363	0.104827	666.104	1003.26	489.607	873.905	548.734	579.807	KCNQ1
ENSG00000054116	-0.084528	0.490326	0.806769	822.898	900.63	883.443	843.673	758.888	869.71	TRAPPC3
ENSG00000054118	-0.262341	0.0199428	0.171877	3344.58	3759.35	3026.57	4188.13	3286.12	3634.72	THRAP3
ENSG00000054148	-0.0229828	0.853411	0.95973	1078.09	1229.28	1085.74	1066.64	1237.57	1162.47	PHPT1
ENSG00000054219	0.00501322	0.974331	0.994508	255.196	239.86	244.315	231.467	233.504	258.537	LY75
ENSG00000054267	0.252387	0.0376274	0.239934	2125.91	1669.8	2050.29	1555.08	1843.78	1827.82	ARID4B
ENSG00000054277	0.00211441	0.992484	0.998324	92.9951	80.7223	92.8397	94.4762	79.9302	89.3473	OPN3
ENSG00000054282	-0.225679	0.101452	0.400112	517.961	591.579	546.288	712.351	548.734	581.708	SDCCAG8
ENSG00000054392	-0.175733	0.508431	0.817364	49.7416	57.6588	59.6129	70.8572	57.4779	59.8817	HHAT
ENSG00000054523	0.0708071	0.611176	0.870779	553.645	483.18	601.992	577.25	594.537	604.52	KIF1B
ENSG00000054598	0.31803	0.0604159	0.308787	274.66	239.86	253.11	180.45	268.529	219.566	FOXC1
ENSG00000164070	1.02606	4.79923e-06	0.000877668	419.559	202.959	699.718	249.417	504.728	344.082	HSPA4L
ENSG00000054690	0.416372	0.0656499	0.323405	101.646	71.4969	105.544	85.9734	96.0958	69.3867	PLEKHH1
ENSG00000054793	0.480528	0.00884051	0.109889	405.502	310.204	545.311	287.208	467.906	419.172	ATP9A
ENSG00000054965	0.115082	0.415328	0.758798	934.276	732.266	768.126	841.783	766.072	703.372	FAM168A
ENSG00000054967	-0.223841	0.169744	0.521177	990.506	1154.33	791.581	1088.37	829.837	807.928	RELT
ENSG00000054983	-0.217749	0.103958	0.405325	468.219	548.911	525.766	624.488	488.562	550.341	GALC
ENSG00000055044	0.150182	0.28419	0.653338	3064.51	2658.07	2483.22	2138	2399.7	2365.8	NOP58
ENSG00000055070	-0.0500421	0.62272	0.8737	3346.74	3363.81	3272.84	3319.9	3066.09	3342.92	SZRD1
ENSG00000055118	0.0272885	0.933171	0.986098	30.2775	41.5143	58.6356	53.8515	59.2741	50.3767	KCNH2
ENSG00000055130	0.243854	0.0292101	0.209878	2010.21	1579.85	2056.15	1705.3	1994.66	1831.62	CUL1
ENSG00000055147	0.0614307	0.659257	0.891284	380.631	344.799	349.859	340.114	344.867	345.033	FAM114A2
ENSG00000055163	-0.196806	0.442622	0.774686	56.2296	68.0373	70.3627	80.3048	59.2741	64.6342	CYFIP2
ENSG00000055208	0.295483	0.0307925	0.215564	6245.81	5208.89	5728.7	3938.71	5263.72	4898.89	TAB2
ENSG00000055211	-0.077193	0.51848	0.823535	1348.43	1454.15	1306.6	1245.2	1223.2	1392.49	GINM1
ENSG00000055332	0.0111587	0.93308	0.986098	1343.02	1372.28	1629.09	1533.35	1621.06	1651.97	EIF2AK2
ENSG00000055483	0.0916742	0.441933	0.774606	1603.62	1439.16	1427.78	1425.65	1398.33	1291.73	USP36
ENSG00000055609	0.109638	0.469377	0.794635	2575.75	2041.12	2036.61	2394.97	2072.8	1758.43	KMT2C
ENSG00000055732	0.52428	0.0190568	0.167595	147.062	104.939	165.157	142.659	229.912	129.268	MCOLN3
ENSG00000073849	1.02421	3.71057e-07	0.0001376	1233.81	582.353	1082.8	364.678	1006.76	687.214	ST6GAL1
ENSG00000055917	-0.0587573	0.622311	0.873664	2540.06	2555.44	2356.17	2579.2	2186.85	2242.24	PUM2
ENSG00000055950	-0.215271	0.0975329	0.395712	546.076	668.842	598.083	734.08	618.785	644.441	MRPL43
ENSG00000056050	-0.164023	0.279304	0.647723	237.894	262.924	251.156	267.368	241.587	288.002	HPF1
ENSG00000056097	0.11449	0.404037	0.751946	7364.99	6358.61	9073.86	8149.52	7728.98	7814.09	ZFR
ENSG00000056277	0.047744	0.822907	0.950809	102.727	107.245	139.748	110.537	110.465	123.565	ZNF280C
ENSG00000056558	0.217804	0.241658	0.607099	3337.01	2736.48	2334.67	1803.55	2920.6	2848.66	TRAF1
ENSG00000056586	0.137416	0.286689	0.655572	1014.3	806.069	930.351	897.524	837.92	824.086	RC3H2
ENSG00000056736	0.470119	0.306805	NA	25.9521	16.1445	23.4542	10.3924	29.637	30.4161	IL17RB
ENSG00000056972	0.367497	0.0348379	0.231501	267.091	250.239	325.428	215.406	357.441	271.844	TRAF3IP2
ENSG00000056998	-0.280735	0.168993	0.520911	165.445	175.283	177.861	263.589	164.351	176.794	GYG2
ENSG00000057019	0.00363512	0.983167	0.996571	208.698	193.733	218.906	190.842	191.294	231.923	DCBLD2
ENSG00000057252	-0.114413	0.404679	0.752112	516.88	536.226	550.197	658.499	565.798	572.203	SOAT1
ENSG00000057294	-0.3432	0.562354	NA	4.32535	16.1445	25.4088	12.2819	13.4714	26.6141	PKP2
ENSG00000057608	-0.0405782	0.75071	0.925903	9355.74	9326.88	7997.9	7721.54	7607.74	8624.87	GDI2
ENSG00000057657	0.0898985	0.606274	0.868927	748.286	982.505	812.103	668.892	876.538	641.59	PRDM1
ENSG00000057663	0.112253	0.396547	0.744889	1091.07	961.748	984.101	824.778	933.118	996.127	ATG5
ENSG00000057757	-0.0978562	0.521648	0.824949	838.037	985.965	787.672	769.037	696.919	731.887	PITHD1
ENSG00000057935	-0.234364	0.158001	0.503415	170.851	198.346	173.952	215.406	182.313	206.259	MTA3
ENSG00000058056	0.198174	0.229491	0.593175	278.985	243.32	336.177	293.821	282.001	244.279	USP13
ENSG00000058063	-0.055717	0.655641	0.888429	2152.94	1978.85	1936.93	2273.1	1839.29	1908.61	ATP11B
ENSG00000058091	-0.20979	0.188582	0.542581	197.885	228.329	217.929	255.086	211.95	242.378	CDK14
ENSG00000058262	0.0733504	0.466398	0.792265	8421.46	8178.32	8264.69	7434.34	8348.66	8181.93	SEC61A1
ENSG00000058272	0.0522943	0.659867	0.891441	1504.14	1290.4	1361.32	1373.68	1268.11	1320.25	PPP1R12A
ENSG00000058335	0.31351	0.548102	NA	15.1387	6.91905	17.5907	16.061	15.2676	15.2081	RASGRF1
ENSG00000058404	-0.457715	0.0241606	0.191271	107.052	175.283	115.317	181.394	140.102	142.575	CAMK2B
ENSG00000058453	0.035046	0.825143	0.951129	306.019	294.06	264.837	269.257	261.345	249.032	CROCC
ENSG00000058600	0.244314	0.047803	0.273541	953.74	862.575	1129.71	884.298	1083.1	926.741	POLR3E
ENSG00000058668	-0.228878	0.247195	0.612806	1163.52	1090.9	1247.96	2020.85	1372.28	1321.2	ATP2B4
ENSG00000058673	0.0121276	0.907077	0.978781	3675.47	3360.35	3551.36	3638.28	3379.52	3516.86	ZC3H11A
ENSG00000058729	0.261827	0.101848	0.400845	490.928	420.909	535.538	342.949	423.899	445.786	RIOK2
ENSG00000058799	-0.0883108	0.555996	0.845575	1068.36	1185.46	904.943	875.795	888.213	981.87	YIPF1
ENSG00000058804	0.0756256	0.515952	0.822149	2091.31	1935.03	2363.01	2233.42	2155.42	2102.51	NDC1
ENSG00000058866	-0.21302	0.370178	0.724722	115.703	129.156	128.998	206.903	153.574	125.466	DGKG
ENSG00000059122	-0.256545	0.0602094	0.308086	408.746	490.099	414.358	548.907	462.517	497.113	FLYWCH1
ENSG00000059145	0.355326	0.132828	0.462232	1014.3	731.113	1289.01	681.174	1318.4	1418.15	UNKL
ENSG00000059377	-0.0848997	0.600463	0.867585	585.004	708.049	525.766	479.939	581.065	608.322	TBXAS1
ENSG00000059378	-0.273287	0.13172	0.460209	233.569	246.779	275.587	361.844	273.02	335.528	PARP12
ENSG00000059573	0.249986	0.0977997	0.395733	1028.35	814.142	1207.89	1042.07	1273.49	1094.03	ALDH18A1
ENSG00000059588	0.212921	0.109117	0.41629	2493.57	1875.06	2232.06	2222.08	2085.37	1777.44	TARBP1
ENSG00000059691	0.0480508	0.800253	0.944846	222.756	189.121	212.065	264.533	221.829	180.596	GATB
ENSG00000059728	-0.563701	0.197592	0.555104	1251.11	1765.51	634.242	1278.26	732.843	825.987	MXD1
ENSG00000059758	-0.304007	0.0894538	0.379596	392.526	417.449	302.951	492.221	317.925	340.28	CDK17
ENSG00000059769	0.302562	0.159463	0.5058	166.526	121.083	121.18	99.2001	151.778	135.922	DNAJC25
ENSG00000059804	-0.156922	0.629432	0.876673	236.813	256.005	113.362	137.935	109.567	118.813	SLC2A3
ENSG00000059915	0.102637	0.769287	0.934006	31.3588	27.6762	31.2723	36.8457	48.497	38.9706	PSD
ENSG00000060069	0.0295338	0.821974	0.95065	759.099	714.969	769.104	817.219	717.575	667.253	CTDP1
ENSG00000060138	0.230233	0.030894	0.216161	2147.54	1983.46	2223.27	1822.45	2206.61	1803.1	YBX3
ENSG00000060140	0.0849412	0.870203	NA	16.2201	10.3786	12.7044	15.1162	12.5733	13.307	STYK1
ENSG00000060237	0.068907	0.585034	0.860741	6879.47	5801.62	6359.03	7355.92	6804.84	5949.2	WNK1
ENSG00000060339	0.0276487	0.814941	0.947685	3657.09	3546.01	3802.52	3319.9	3714.51	4095.72	CCAR1
ENSG00000060491	-0.529755	0.00571393	0.0843816	594.736	791.078	515.016	1102.54	648.422	644.441	OGFR
ENSG00000109436	1.01995	7.28922e-09	7.48547e-06	245.464	115.318	265.815	130.377	229.013	118.813	TBC1D9
ENSG00000060642	0.409138	0.0376714	0.240054	522.286	393.233	528.698	269.257	472.396	484.757	PIGV
ENSG00000060656	-0.0178533	0.906995	0.978772	311.425	297.519	310.769	364.678	341.275	312.716	PTPRU
ENSG00000060688	-0.00402759	0.970774	0.994081	1535.5	1481.83	1500.09	1446.43	1489.04	1608.25	SNRNP40
ENSG00000067798	1.01356	2.14485e-05	0.00246842	13899.5	6701.1	11388	3250.93	9585.34	7321.73	NAV3
ENSG00000060762	0.306717	0.0130329	0.134698	1074.85	914.468	1112.12	781.318	1038.19	912.483	MPC1
ENSG00000060971	0.0130345	0.925582	0.983644	578.516	603.111	619.583	579.139	692.429	691.966	ACAA1
ENSG00000060982	0.238386	0.0535497	0.29074	2254.59	1796.65	1944.75	1606.1	2088.06	1926.67	BCAT1
ENSG00000061273	-0.208005	0.283508	0.652636	148.143	170.67	171.998	231.467	178.72	173.942	HDAC7
ENSG00000061337	-0.720913	0.0220371	0.181699	47.5789	78.4159	43.9767	96.3658	42.2103	45.6242	LZTS1
ENSG00000061455	-0.0274601	0.930769	0.985468	36.7655	41.5143	35.1814	43.4591	52.9874	42.7726	PRDM6
ENSG00000061656	-0.47016	0.00793097	0.103411	187.072	291.753	193.497	311.772	260.447	286.101	SPAG4
ENSG00000061676	0.20208	0.555617	0.845491	29.1961	36.9016	40.0677	38.7353	57.4779	35.1686	NCKAP1
ENSG00000061794	0.0544065	0.623711	0.874086	1197.04	1147.41	1180.53	1105.37	1111.84	1107.34	MRPS35
ENSG00000061918	1.50343	0.0212139	NA	9.73204	6.91905	29.3178	2.83429	15.2676	9.50503	GUCY1B1
ENSG00000061936	-0.309654	0.00945107	0.114286	920.219	1117.43	895.17	1193.23	878.334	1027.49	SFSWAP
ENSG00000061938	-0.0592265	0.660651	0.891703	439.023	420.909	443.676	491.276	434.677	459.093	TNK2
ENSG00000061987	0.0414363	0.716361	0.914392	1006.73	982.505	992.896	973.105	951.977	912.483	MON2
ENSG00000062194	0.336128	0.021894	0.181365	2857.98	2206.02	2763.69	1752.53	2561.36	2523.59	GPBP1
ENSG00000062282	-0.0691154	0.58955	0.862638	1117.02	1286.94	1294.87	1261.26	1371.39	1421.95	DGAT2
ENSG00000062485	-0.0395519	0.728325	0.917843	3836.59	4203.32	3828.9	3622.22	3518.72	3670.84	CS
ENSG00000062524	-0.338888	0.120835	0.440393	76.775	102.633	84.0444	106.758	96.0958	115.961	LTK
ENSG00000062582	0.169315	0.350674	0.710391	727.741	807.223	697.764	530.012	647.524	508.519	MRPS24
ENSG00000062598	-0.0344613	0.813594	0.94736	384.956	419.756	436.835	467.657	486.766	453.39	ELMO2
ENSG00000062650	0.121066	0.292342	0.660213	2709.83	2186.42	2541.85	2466.77	2349.41	2333.49	WAPL
ENSG00000062716	-5.57043e-05	0.999697	0.999922	2054.54	2041.12	1677.96	1520.12	1758.46	1930.47	VMP1
ENSG00000062725	0.0690101	0.654598	0.888124	530.937	498.172	635.219	486.553	503.83	606.421	APPBP2
ENSG00000062822	-0.0699355	0.593018	0.864315	1598.22	1764.36	1864.61	2103.99	1937.18	1800.25	POLD1
ENSG00000063015	0.719814	0.226418	NA	10.8134	4.6127	14.6589	10.3924	15.2676	9.50503	SEZ6
ENSG00000063046	-0.280487	0.0098174	0.11702	8291.7	10153.7	8115.17	10222.3	7704.73	8910.02	EIF4B
ENSG00000063169	-0.252556	0.227623	0.590751	135.167	168.364	168.089	235.246	167.943	157.784	BICRA
ENSG00000063176	0.0661562	0.664726	0.893496	280.067	274.456	314.678	307.993	292.778	265.19	SPHK2
ENSG00000063177	-0.0289569	0.808846	0.945991	13167.5	14751.4	12823.6	11920.1	12221.2	12317.6	RPL18
ENSG00000063180	-0.640084	0.0253405	0.195095	54.0669	101.479	50.8175	68.0229	43.1084	61.7827	CA11
ENSG00000063241	-0.137805	0.33619	0.699597	622.851	801.457	642.06	678.339	622.378	598.817	ISOC2
ENSG00000063244	0.0184552	0.868712	0.964667	6149.57	6239.83	5670.06	5291.61	5768.44	5834.19	U2AF2
ENSG00000063245	-0.148338	0.187965	0.542265	2907.72	3557.54	3113.55	3581.59	3290.61	3183.24	EPN1
ENSG00000063322	-0.176223	0.155323	0.498506	1179.74	1215.45	965.533	1181.9	1024.72	1183.38	MED29
ENSG00000063438	-0.3087	0.0657826	0.323436	3455.96	3733.98	3362.75	5677.08	3801.62	3742.13	AHRR
ENSG00000063587	-0.150384	0.354265	0.711576	308.181	279.068	287.314	378.85	292.778	326.023	ZNF275
ENSG00000063601	-0.26199	0.128665	0.456108	310.344	321.736	257.019	421.364	323.313	324.122	MTMR1
ENSG00000063660	-0.0254656	0.876046	0.967907	280.067	277.915	304.905	347.673	351.154	326.973	GPC1
ENSG00000063761	0.157826	0.437167	0.772311	126.517	104.939	108.476	104.869	114.956	103.605	ADCK1
ENSG00000063854	-0.0262609	0.857321	0.960796	331.971	382.854	413.381	392.076	385.281	377.35	HAGH
ENSG00000063978	-0.216588	0.069659	0.334195	1682.56	1891.21	1682.84	2219.25	1778.22	1865.84	RNF4
ENSG00000064012	-0.0573428	0.688539	0.903795	417.397	464.73	502.312	490.332	506.524	529.43	CASP8
ENSG00000064102	0.171713	0.275496	0.642641	752.611	656.157	750.536	520.564	667.282	749.947	INTS13
ENSG00000064115	0.330798	0.0102232	0.119459	929.951	679.22	973.351	806.827	1004.07	824.086	TM7SF3
ENSG00000064195	-1.71817	0.000948716	NA	8.65071	25.3699	6.84082	58.5753	17.0637	23.7626	DLX3
ENSG00000064199	-0.123736	0.4896	0.806651	148.143	186.814	165.157	170.057	184.109	186.299	SPA17
ENSG00000064201	0.0635527	0.713232	0.913784	200.048	164.904	188.611	183.284	174.23	189.15	TSPAN32
ENSG00000102755	1.00578	2.88571e-05	0.00310679	333.052	159.138	326.405	96.3658	279.307	211.962	FLT1
ENSG00000064300	0.200593	0.622105	0.873664	34.6028	23.0635	18.5679	31.1772	32.3313	19.9606	NGFR
ENSG00000064309	-0.42106	0.039042	0.245391	290.88	343.646	224.77	419.474	241.587	249.982	CDON
ENSG00000064313	0.151579	0.183449	0.538252	1915.05	1597.15	1831.39	1584.37	1656.98	1681.44	TAF2
ENSG00000064393	0.182212	0.276827	0.644513	2883.93	2340.95	1993.61	1982.11	2053.94	1786	HIPK2
ENSG00000064419	-0.111431	0.348564	0.708599	1765.83	1767.82	1737.57	2091.7	1703.68	1764.13	TNPO3
ENSG00000064489	0.424608	0.32798	NA	32.4401	13.8381	18.5679	21.7295	24.2485	19.9606	BORCS8-MEF2B
ENSG00000064490	-0.0725477	0.557336	0.846216	775.319	879.873	833.603	914.53	916.054	862.106	RFXANK
ENSG00000064545	0.337894	0.0144683	0.144791	506.066	439.36	558.015	463.878	613.397	424.875	TMEM161A
ENSG00000064547	-0.203728	0.174733	0.528594	381.712	457.81	398.722	488.442	489.46	517.074	LPAR2
ENSG00000064601	-0.0186717	0.894478	0.974866	2196.2	2262.53	2719.71	2707.69	2786.78	2832.5	CTSA
ENSG00000064607	-0.14988	0.148448	0.488328	2909.88	2987.88	2759.78	3264.15	2853.24	3202.25	SUGP2
ENSG00000064651	0.360137	0.0123792	0.130961	559.052	456.657	651.832	435.535	506.524	445.786	SLC12A2
ENSG00000064652	-0.166201	0.372279	0.725961	126.517	156.832	140.725	138.88	133.816	154.932	SNX24
ENSG00000064666	-0.229833	0.0555027	0.297098	5207.72	6931.74	5408.16	6760.72	6052.24	5857	CNN2
ENSG00000064687	0.122759	0.425713	0.764567	394.688	341.34	418.267	442.149	465.212	389.706	ABCA7
ENSG00000064703	0.108002	0.373819	0.727794	912.649	749.564	827.739	804.938	834.327	832.641	DDX20
ENSG00000064726	0.108112	0.363554	0.719669	1431.69	1337.68	1374.03	1212.13	1247.45	1210.94	BTBD1
ENSG00000064763	-0.330944	0.019414	0.169952	708.277	975.586	744.672	912.64	647.524	754.7	FAR2
ENSG00000064932	-0.0547001	0.597871	0.86666	2515.19	2709.96	2536.97	2634.94	2473.35	2472.26	SBNO2
ENSG00000104432	0.99938	0.00140511	0.0360736	62.7176	31.1357	51.7948	23.6191	59.2741	32.3171	IL7
ENSG00000064961	-0.2432	0.0160524	0.152418	2115.1	2543.9	2204.7	2521.57	2101.54	2534.99	HMG20B
ENSG00000064989	1.12964	0.0556634	0.2976	379.55	200.652	365.495	52.9067	239.791	196.754	CALCRL
ENSG00000064995	0.0139674	0.903821	0.977863	1402.5	1326.15	1276.3	1321.72	1239.37	1231.85	TAF11
ENSG00000064999	0.23488	0.0539618	0.291719	799.109	620.408	789.626	702.903	785.83	692.917	ANKS1A
ENSG00000065000	-0.0353881	0.741373	0.922398	5020.65	5220.42	5114.98	5700.7	5409.21	5010.1	AP3D1
ENSG00000065029	-0.0222033	0.851908	0.958999	859.664	957.135	962.601	930.591	983.411	962.86	ZNF76
ENSG00000065054	0.0197056	0.923633	0.983215	139.493	146.453	143.657	167.223	148.185	112.159	SLC9A3R2
ENSG00000065057	-0.177591	0.409255	0.754672	97.3204	118.777	121.18	149.272	115.854	110.258	NTHL1
ENSG00000065060	0.353492	0.00280099	0.0548287	2038.32	1444.93	2062.02	1611.76	2060.22	1763.18	UHRF1BP1
ENSG00000065135	-0.211107	0.0569263	0.300302	3422.44	3946.16	3041.23	3619.38	3126.26	3535.87	GNAI3
ENSG00000065150	0.171395	0.142541	0.478724	2755.25	2267.14	2756.85	2369.46	2324.26	2320.18	IPO5
ENSG00000065154	0.00696124	0.954383	0.990239	921.3	912.161	986.055	924.922	992.392	1048.41	OAT
ENSG00000065183	0.369961	0.00438313	0.0722404	1766.91	1250.04	1654.5	1152.61	1554.6	1446.67	WDR3
ENSG00000065243	0.0991575	0.45191	0.780971	833.712	690.752	804.285	703.848	713.085	798.423	PKN2
ENSG00000065268	0.0336518	0.808252	0.945991	612.037	690.752	763.24	721.798	708.595	624.481	WDR18
ENSG00000065308	-0.0696885	0.636944	0.880089	627.176	659.616	745.649	853.12	731.945	695.768	TRAM2
ENSG00000065320	0.209669	0.277692	0.645851	162.201	181.048	171.998	136.046	198.478	145.427	NTN1
ENSG00000065328	0.0734686	0.530967	0.831699	998.075	966.361	1107.24	1014.67	989.697	960.008	MCM10
ENSG00000065357	0.0624153	0.789183	0.941686	102.727	87.6413	123.135	128.488	96.9939	92.1988	DGKA
ENSG00000065413	0.102623	0.738112	0.920947	62.7176	43.8207	63.5219	52.9067	36.8218	54.1787	ANKRD44
ENSG00000065427	0.124013	0.235755	0.600292	3090.46	2879.48	3269.91	2755.87	2975.38	2931.35	KARS
ENSG00000065457	0.231637	0.0888818	0.378492	509.31	428.981	571.697	487.497	573.881	492.361	ADAT1
ENSG00000065485	-0.0260244	0.862859	0.962337	389.282	402.458	421.199	403.414	462.517	490.46	PDIA5
ENSG00000065491	0.341684	0.00751488	0.0995275	774.238	611.183	809.171	566.857	702.308	625.431	TBC1D22B
ENSG00000065518	0.0494399	0.703366	0.90987	1945.33	1991.53	1935.95	1590.98	1950.66	2054.04	NDUFB4
ENSG00000065526	0.194923	0.146975	0.486505	2970.44	2269.45	3031.46	3088.43	3161.28	2645.25	SPEN
ENSG00000065534	-0.498131	0.0476184	0.27307	58.3923	70.3437	67.4309	99.2001	67.3569	102.654	MYLK
ENSG00000065548	0.144674	0.27981	0.64818	2760.66	2583.11	2574.1	2000.06	2336.84	2357.25	ZC3H15
ENSG00000065559	-0.0299235	0.843696	0.957223	257.358	245.626	247.247	256.975	239.791	256.636	MAP2K4
ENSG00000065600	-0.395302	0.0932114	0.388149	117.866	152.219	119.226	222.019	142.797	125.466	TMEM206
ENSG00000065609	-0.213501	0.586734	0.861499	18.3827	24.2167	37.1359	34.0114	25.1466	35.1686	SNAP91
ENSG00000065613	0.0379981	0.738551	0.920947	1783.13	1592.53	1552.87	1597.59	1564.48	1581.64	SLK
ENSG00000065615	-0.0103458	0.946286	0.988562	950.496	876.413	816.989	780.374	664.588	791.769	CYB5R4
ENSG00000065621	0.127503	0.798374	NA	16.2201	14.9913	18.5679	15.1162	11.6752	12.3565	GSTO2
ENSG00000065665	-0.202792	0.471898	0.796	57.3109	49.5865	54.7266	68.0229	43.1084	59.8817	SEC61A2
ENSG00000065675	-0.0605346	0.779489	0.937459	104.89	103.786	116.294	145.493	125.733	112.159	PRKCQ
ENSG00000065717	0.364775	0.44646	NA	24.8708	26.523	16.6134	17.0057	26.0447	9.50503	TLE2
ENSG00000065802	0.0587168	0.676726	0.900099	751.53	642.318	723.172	814.385	710.391	639.689	ASB1
ENSG00000065809	-0.485082	0.00296775	0.0570116	7229.83	9142.37	5427.7	8924.23	5135.29	6836.02	FAM107B
ENSG00000065833	0.270739	0.169425	0.520971	1153.79	1029.79	1340.8	763.368	1388.45	1425.75	ME1
ENSG00000065882	-0.187291	0.0726668	0.341465	3205.09	3793.95	3321.71	3691.19	3087.64	3462.68	TBC1D1
ENSG00000065883	0.0138799	0.906022	0.978275	1743.12	1582.16	1637.89	1841.34	1674.04	1581.64	CDK13
ENSG00000065911	0.210328	0.207599	0.567374	9396.83	8022.64	7166.25	5570.32	6768.02	6573.68	MTHFD2
ENSG00000065923	0.0578328	0.759526	0.930586	136.249	136.075	149.521	157.775	164.351	138.773	SLC9A7
ENSG00000125148	0.995962	2.2339e-05	0.00250609	1432.77	694.211	1621.27	472.381	1517.78	1125.4	MT2A
ENSG00000065978	0.0811944	0.473993	0.797656	157470	157726	158531	130301	150061	152532	YBX1
ENSG00000065989	-0.521226	0.00258614	0.0524181	333.052	483.18	285.36	529.067	342.173	366.894	PDE4A
ENSG00000066027	0.11315	0.353384	0.711457	1164.6	1002.11	1017.33	978.774	990.595	951.454	PPP2R5A
ENSG00000066032	0.0867197	0.87817	0.968427	6.48803	13.8381	27.3633	20.7848	43.1084	38.0201	CTNNA2
ENSG00000066044	0.0755474	0.467683	0.792934	2358.4	2264.84	2419.7	2278.77	2270.38	2145.29	ELAVL1
ENSG00000066056	0.326916	0.491178	0.806776	16.2201	42.6675	109.453	53.8515	47.5989	41.8221	TIE1
ENSG00000066084	0.00486722	0.978949	0.995681	419.559	335.574	337.155	460.099	350.256	306.062	DIP2B
ENSG00000066117	-0.315987	0.0105128	0.120855	580.679	723.041	606.878	766.202	564.9	691.966	SMARCD1
ENSG00000066135	-0.0520966	0.637681	0.880356	4212.89	3994.6	4084.95	4714.36	4160.86	4205.98	KDM4A
ENSG00000066136	-0.0577239	0.563409	0.849985	23019.5	25332.9	22477	22774.4	23205.8	23401.4	NFYC
ENSG00000066185	0.0800588	0.835736	0.953444	31.3588	21.9103	39.0904	29.2876	21.5542	35.1686	ZMYND12
ENSG00000066230	0.0965952	0.72198	0.915657	82.1817	69.1905	63.5219	84.0839	116.752	92.1988	SLC9A3
ENSG00000066248	-0.475471	0.0123691	0.130961	124.354	179.895	126.067	208.792	157.166	178.695	NGEF
ENSG00000066279	-0.475576	0.0153475	0.148902	633.664	628.48	674.309	1161.11	699.614	999.929	ASPM
ENSG00000066294	-0.320448	0.0716446	0.338773	235.732	254.852	257.019	367.513	234.402	284.2	CD84
ENSG00000066322	-0.127541	0.208064	0.567448	3148.86	3514.88	3049.05	3413.43	3309.47	3458.88	ELOVL1
ENSG00000066336	-0.0572646	0.689667	0.90416	10224.1	12428.9	9344.56	8690.87	10459.2	10126.7	SPI1
ENSG00000066379	0.40616	0.0537274	0.291214	153.55	119.93	124.112	88.8077	139.204	106.456	ZNRD1
ENSG00000066422	0.185862	0.164973	0.514217	927.788	720.734	950.874	774.705	806.487	863.057	ZBTB11
ENSG00000066427	-0.115824	0.413459	0.757885	336.296	358.637	303.928	358.065	337.683	343.132	ATXN3
ENSG00000066455	-0.200371	0.120585	0.43994	600.143	614.642	589.288	715.185	599.027	723.333	GOLGA5
ENSG00000066557	0.0878178	0.507563	0.816874	488.765	442.819	528.698	470.492	480.479	495.212	LRRC40
ENSG00000066583	0.293157	0.0650298	0.321503	269.253	244.473	338.132	263.589	323.313	251.883	ISOC1
ENSG00000066629	-0.143448	0.47606	0.79902	110.296	130.309	112.385	142.659	139.204	127.367	EML1
ENSG00000066651	-0.0106949	0.945046	0.988356	365.492	351.718	340.086	301.379	302.657	362.142	TRMT11
ENSG00000066654	0.0185294	0.882039	0.970057	937.52	838.358	837.512	812.496	805.588	895.374	THUMPD1
ENSG00000066697	0.0791815	0.639858	0.881287	496.334	477.414	494.494	427.977	608.906	609.273	MSANTD3
ENSG00000066735	-0.75594	0.00362997	0.0641341	91.9137	125.696	58.6356	123.764	54.7836	96.0008	KIF26A
ENSG00000066739	-0.068603	0.68114	0.901179	365.492	364.403	385.04	499.779	435.575	379.251	ATG2B
ENSG00000066777	-0.138925	0.314214	0.681834	2309.74	2249.84	1973.09	2497.95	1836.6	1988.45	ARFGEF1
ENSG00000066827	-0.14547	0.354419	0.711576	355.76	364.403	329.337	371.292	276.612	326.973	ZFAT
ENSG00000066855	0.0395263	0.791131	0.942247	360.086	354.025	425.108	413.806	430.186	414.419	MTFR1
ENSG00000066923	0.0246265	0.939236	0.98783	50.8229	34.5953	33.2268	52.9067	53.8855	47.5252	STAG3
ENSG00000066926	-0.194528	0.161756	0.508823	496.334	614.642	616.651	626.377	576.575	692.917	FECH
ENSG00000066933	0.198161	0.20466	0.563773	337.378	274.456	306.86	284.373	281.103	247.131	MYO9A
ENSG00000067048	0.219157	0.120141	0.439199	7635.33	6533.89	6752.87	5829.18	5897.77	5064.28	DDX3Y
ENSG00000067057	-0.239063	0.0943527	0.390314	2936.91	3720.14	3303.14	4551.87	3755.82	3526.37	PFKP
ENSG00000182197	0.98742	0.000457774	0.0181344	81.1004	41.5143	72.3172	47.2381	118.548	48.4757	EXT1
ENSG00000148200	0.982712	0.0016962	0.0400077	55.1482	25.3699	61.5674	26.4533	53.8855	34.2181	NR6A1
ENSG00000067082	-0.518616	0.0220095	0.181699	1564.7	2507	1366.21	2540.47	1425.27	1193.83	KLF6
ENSG00000067113	-0.109448	0.713498	0.913784	52.9856	71.4969	59.6129	41.5695	65.5607	79.8423	PLPP1
ENSG00000067141	0.364633	0.049811	0.279637	229.244	163.751	182.748	181.394	257.752	174.893	NEO1
ENSG00000067167	-0.0139122	0.900127	0.977128	3149.94	3238.12	3144.82	2851.29	2920.6	3215.55	TRAM1
ENSG00000067177	-0.271098	0.21859	0.580558	90.8324	104.939	107.499	149.272	114.956	123.565	PHKA1
ENSG00000067182	-0.336954	0.0112383	0.125048	791.54	969.82	839.466	1199.85	898.99	1025.59	TNFRSF1A
ENSG00000067191	0.0193126	0.960317	0.991252	28.1148	21.9103	50.8175	59.52	50.2931	45.6242	CACNB1
ENSG00000067208	-0.241362	0.172418	0.5254	315.751	362.097	275.587	290.987	223.625	309.864	EVI5
ENSG00000067221	0.0739445	0.786549	0.940056	59.4736	81.8754	89.9079	54.7962	83.5226	85.5453	STOML1
ENSG00000067225	0.0423898	0.707759	0.91141	22596.7	22942.4	21106.9	19299.6	22904	22438.5	PKM
ENSG00000067248	-0.0251981	0.846976	0.958358	1086.74	975.586	1090.62	1179.06	952.876	1028.44	DHX29
ENSG00000067334	0.0520448	0.674666	0.899151	4116.65	3876.97	3856.27	3284.94	3463.04	3868.55	DNTTIP2
ENSG00000067365	-0.313853	0.0370926	0.2383	240.057	320.583	257.997	336.335	272.122	301.31	METTL22
ENSG00000067369	0.0941944	0.533034	0.833451	750.449	576.588	747.604	820.999	780.442	734.739	TP53BP1
ENSG00000067445	-0.0942556	0.714755	0.913837	70.287	68.0373	73.2945	105.813	94.2997	79.8423	TRO
ENSG00000067533	0.126094	0.443667	0.774686	1014.3	999.803	880.511	699.124	793.015	765.155	RRP15
ENSG00000067560	-0.100151	0.349043	0.709083	20866.6	23711.6	20578.2	20374.7	19687.1	21441.5	RHOA
ENSG00000067596	-0.0963839	0.397728	0.746174	1678.24	1740.14	1518.66	1783.71	1582.44	1585.44	DHX8
ENSG00000067601	0.423546	0.24878	0.614136	41.0909	21.9103	38.1131	22.6743	32.3313	38.0201	PMS2P4
ENSG00000067606	-0.388432	0.101627	0.400567	115.703	164.904	123.135	214.461	139.204	115.961	PRKCZ
ENSG00000067646	-0.299303	0.137436	0.469972	1024.03	1156.63	824.807	1159.22	644.83	751.848	ZFY
ENSG00000067704	-0.105704	0.3406	0.702783	2856.9	3008.63	2998.23	3319.9	2734.69	2913.29	IARS2
ENSG00000104290	0.978272	7.67712e-05	0.00589662	248.708	134.921	448.562	161.554	361.931	240.477	FZD3
ENSG00000067829	-0.128729	0.294845	0.66221	925.625	1150.87	1110.17	1141.27	1087.59	1124.45	IDH3G
ENSG00000067836	0.0796869	0.543	0.837919	811.004	867.188	815.035	725.578	799.302	704.323	ROGDI
ENSG00000067840	-0.00380753	0.989548	0.99757	55.1482	56.5056	41.0449	57.6305	64.6626	47.5252	PDZD4
ENSG00000067842	-0.276857	0.296151	0.663918	54.0669	65.731	54.7266	85.9734	72.7454	68.4362	ATP2B3
ENSG00000067900	0.026579	0.814314	0.947537	2961.79	2686.9	2821.35	2832.4	2526.33	2636.7	ROCK1
ENSG00000167524	0.970131	0.00225964	0.0481889	65.9616	20.7572	61.5674	37.7905	74.5416	43.7231	SGK494
ENSG00000067992	-0.147178	0.494142	0.808897	102.727	102.633	111.408	146.438	119.446	119.763	PDK3
ENSG00000068001	0.0317769	0.877939	0.968427	125.435	149.913	164.18	167.223	157.166	120.714	HYAL2
ENSG00000068024	-0.0195855	0.899675	0.977128	645.559	643.472	706.559	827.612	675.365	583.609	HDAC4
ENSG00000068028	0.13309	0.352318	0.71136	581.76	568.515	635.219	530.956	514.607	480.004	RASSF1
ENSG00000068078	-0.454377	0.0234679	0.188092	124.354	222.563	185.679	243.749	201.173	235.725	FGFR3
ENSG00000068079	-0.152705	0.226665	0.589633	597.98	709.203	616.651	627.322	630.461	715.729	IFI35
ENSG00000068097	-0.0590605	0.722174	0.915697	245.464	232.941	207.179	265.478	241.587	224.319	HEATR6
ENSG00000068120	0.107628	0.413226	0.757562	1024.03	994.037	1209.85	1059.08	1235.77	1167.22	COASY
ENSG00000068137	-0.261698	0.12923	0.456581	458.487	638.859	600.038	804.938	634.053	586.46	PLEKHH3
ENSG00000068305	0.0649308	0.629497	0.876673	952.659	836.052	773.013	844.618	814.569	747.096	MEF2A
ENSG00000068308	-0.188781	0.0987086	0.396639	953.74	1138.18	926.442	1083.64	1020.23	1085.47	OTUD5
ENSG00000068323	0.19642	0.218394	0.580558	2190.79	1944.25	1848	1378.41	2096.15	2032.18	TFE3
ENSG00000068354	-0.188997	0.295482	0.662972	162.201	185.661	172.975	216.351	164.351	167.289	TBC1D25
ENSG00000068366	0.158356	0.22033	0.583031	1766.91	1560.25	1772.75	1781.82	1718.05	1368.72	ACSL4
ENSG00000225492	0.961405	0.000678874	0.0234792	67.043	32.2889	77.2035	36.8457	83.5226	47.5252	GBP1P1
ENSG00000068394	-0.153056	0.236899	0.60195	415.234	452.045	408.495	457.265	414.02	466.697	GPKOW
ENSG00000068400	0.159093	0.218392	0.580558	2256.75	1871.6	2129.45	1830	2326.96	2309.72	GRIPAP1
ENSG00000068438	0.0761643	0.579857	0.8585	512.554	554.677	530.652	509.227	552.327	451.489	FTSJ1
ENSG00000068489	-0.194819	0.209057	0.56833	1075.93	1201.61	1263.6	1540.91	1436.95	1579.74	PRR11
ENSG00000068615	0.115148	0.793474	NA	15.1387	24.2167	20.5225	19.84	35.0256	21.8616	REEP1
ENSG00000068650	0.421404	0.00497948	0.0774718	1973.44	1295.02	1826.5	1746.87	1922.81	1229.95	ATP11A
ENSG00000112159	0.947152	6.4595e-11	4.31172e-07	3297	1307.7	3061.76	1870.63	3013.1	1679.54	MDN1
ENSG00000068697	0.119901	0.369052	0.724109	899.673	878.719	913.738	724.633	789.423	792.72	LAPTM4A
ENSG00000068724	-0.47484	0.00433062	0.0717414	1987.5	2515.07	1828.45	3490.9	2107.82	2226.08	TTC7A
ENSG00000068745	-0.060589	0.592619	0.864195	1242.46	1341.14	1272.39	1206.46	1206.14	1333.56	IP6K2
ENSG00000068784	-0.164882	0.314391	0.682016	196.804	246.779	230.633	227.688	229.013	262.339	SRBD1
ENSG00000068796	-0.24847	0.112409	0.423917	495.253	585.813	625.446	777.539	609.804	691.966	KIF2A
ENSG00000068831	-0.339343	0.011914	0.128891	1147.3	1484.14	1136.55	1715.69	1313.01	1351.62	RASGRP2
ENSG00000068878	0.033504	0.78851	0.941473	1826.38	1632.9	1704.34	1645.78	1451.32	1587.34	PSME4
ENSG00000068885	0.161685	0.397301	0.745568	138.411	123.39	166.134	135.101	150.879	148.279	IFT80
ENSG00000068903	-0.00748124	0.96005	0.991252	1087.83	1225.83	932.306	912.64	1033.7	933.394	SIRT2
ENSG00000068912	-0.145488	0.21718	0.579617	827.224	855.656	752.49	909.806	797.506	863.057	ERLEC1
ENSG00000068971	0.392094	0.027277	0.203096	297.368	247.933	258.974	181.394	258.65	192.952	PPP2R5B
ENSG00000068976	-0.589995	0.203775	NA	23.7894	19.604	14.6589	34.0114	11.6752	20.9111	PYGM
ENSG00000069011	0.250686	0.267448	0.633165	113.541	100.326	173.952	139.825	140.102	118.813	PITX1
ENSG00000069020	0.649032	0.00812543	0.104827	83.263	59.9651	118.248	61.4096	105.077	74.1393	MAST4
ENSG00000069188	0.329273	0.634207	NA	2.16268	16.1445	36.1586	13.2267	12.5733	11.406	SDK2
ENSG00000069248	-0.0979249	0.373206	0.727131	1473.86	1561.4	1517.68	1636.33	1401.92	1503.7	NUP133
ENSG00000069275	-0.326696	0.00305256	0.0580508	9343.84	10940.2	10041.3	12845.9	9332.07	12227.3	NUCKS1
ENSG00000069329	-0.0810453	0.436304	0.772091	1527.93	1593.69	1532.34	1625.94	1490.83	1593.99	VPS35
ENSG00000069345	-0.00962758	0.940155	0.987846	1962.63	1986.92	1809.89	1609.88	1707.27	1920.02	DNAJA2
ENSG00000069399	0.0337628	0.821137	0.9505	1710.68	1658.27	1264.57	1317	1522.27	1419.1	BCL3
ENSG00000069424	-0.371124	0.0128316	0.133643	11501.1	15149.3	9121.74	12574.8	9332.97	11020.1	KCNAB2
ENSG00000069482	0.182567	0.345667	0.706662	245.464	235.248	375.268	261.699	301.759	315.567	GAL
ENSG00000069493	1.03076	0.051519	0.284677	1285.71	633.093	1284.12	239.97	1060.65	903.929	CLEC2D
ENSG00000069667	1.14027	0.0570352	NA	10.8134	8.07223	24.4315	3.77905	24.2485	15.2081	RORA
ENSG00000069702	0.434662	0.0068945	0.0941121	374.143	303.285	445.631	261.699	412.224	346.934	TGFBR3
ENSG00000069849	0.0895663	0.478529	0.800647	1937.76	1922.34	1907.61	1553.19	1712.66	1748.93	ATP1B3
ENSG00000069869	0.400962	0.00351675	0.0630182	735.31	502.784	759.331	562.134	621.48	536.084	NEDD4
ENSG00000069943	-0.413497	0.0161184	0.152608	278.985	343.646	292.201	434.591	248.771	312.716	PIGB
ENSG00000069956	-0.0950655	0.437784	0.772317	4062.59	4436.26	4223.72	4488.57	3612.13	3783.95	MAPK6
ENSG00000069966	-0.306466	0.0611027	0.310325	519.042	665.382	487.653	715.185	502.033	485.707	GNB5
ENSG00000069974	-0.216627	0.0621256	0.313282	2646.03	3036.31	2365.95	2960.89	2404.19	2620.54	RAB27A
ENSG00000069998	-0.222477	0.124884	0.447862	620.688	800.303	675.287	842.728	654.709	633.986	HDHD5
ENSG00000070010	0.0363179	0.768271	0.93381	1333.29	1366.51	1482.5	1219.69	1316.6	1443.81	UFD1
ENSG00000070018	0.275737	0.183616	0.538252	192.478	149.913	141.703	136.991	149.981	113.11	LRP6
ENSG00000070047	0.0823449	0.458637	0.78592	2064.27	1880.83	1965.27	2071.86	2189.55	1920.97	PHRF1
ENSG00000070061	0.139089	0.304883	0.672203	1400.33	1140.49	1297.8	1387.86	1266.31	1070.27	ELP1
ENSG00000070081	-0.29882	0.017349	0.159401	2803.91	3481.44	3434.09	4122	3053.51	3825.78	NUCB2
ENSG00000070087	0.231844	0.629242	NA	11.8947	13.8381	23.4542	15.1162	19.758	18.0596	PFN2
ENSG00000070159	-0.000628121	0.997668	0.999553	104.89	124.543	110.43	102.979	103.281	92.1988	PTPN3
ENSG00000070182	0.193869	0.593049	0.864315	56.2296	25.3699	30.2951	42.5143	52.9874	53.2282	SPTB
ENSG00000070190	0.703801	0.00329052	0.0607586	2064.27	1244.28	2282.88	741.638	1878.81	1836.37	DAPP1
ENSG00000070193	1.15973	0.0122073	NA	23.7894	9.2254	36.1586	10.3924	26.9428	19.0101	FGF10
ENSG00000070214	-0.0900611	0.445339	0.775591	5409.93	5191.59	5376.88	5975.62	4672.77	5285.75	SLC44A1
ENSG00000070269	0.378179	0.00805869	0.104315	396.851	319.429	462.244	324.053	435.575	352.637	TMEM260
ENSG00000070366	-0.205823	0.231825	0.595969	154.631	177.589	169.066	196.511	169.739	194.853	SMG6
ENSG00000070367	0.142508	0.220614	0.583245	1933.43	1790.88	2161.7	1828.12	1816.84	1736.57	EXOC5
ENSG00000070371	-0.0125074	0.955409	0.99058	540.669	488.946	806.239	930.591	646.626	590.262	CLTCL1
ENSG00000070404	0.0934714	0.729952	0.918026	90.8324	83.0286	110.43	80.3048	129.325	146.377	FSTL3
ENSG00000070413	-0.16196	0.199795	0.5581	1522.52	1562.55	1347.64	1828.12	1523.16	1523.66	DGCR2
ENSG00000070423	-0.383057	0.0134022	0.137174	1108.37	1484.14	1084.76	1709.08	1129.8	1140.6	RNF126
ENSG00000070444	-0.0271456	0.898933	0.976624	120.029	114.164	112.385	136.046	108.669	96.9513	MNT
ENSG00000070476	0.0593934	0.669254	0.895874	687.731	618.102	794.512	778.484	739.13	733.788	ZXDC
ENSG00000070495	-0.0641478	0.634227	0.879042	1034.84	1081.68	893.216	893.745	870.251	950.503	JMJD6
ENSG00000070501	0.0999317	0.513415	0.820364	408.746	350.565	402.631	328.777	338.581	392.558	POLB
ENSG00000070540	-0.650055	0.0475617	0.272979	29.1961	42.6675	30.2951	57.6305	46.7008	66.5352	WIPI1
ENSG00000070610	0.180266	0.159381	0.5058	1651.2	1394.19	1535.28	1208.35	1476.46	1512.25	GBA2
ENSG00000226435	0.942011	4.3643e-07	0.000138722	208.698	113.011	201.316	105.813	190.395	94.0998	ANKRD18DP
ENSG00000070669	0.223584	0.187805	0.542213	2207.01	1849.69	1785.45	1285.82	2009.93	2005.56	ASNS
ENSG00000070718	0.152433	0.464505	0.790906	139.493	147.606	192.52	121.874	150.879	165.388	AP3M2
ENSG00000070729	0.0272747	0.968877	NA	2.16268	10.3786	18.5679	12.2819	9.87901	7.60403	CNGB1
ENSG00000128512	0.934635	0.000159902	0.00920125	473.626	194.887	282.428	127.543	333.192	247.131	DOCK4
ENSG00000070756	0.0141143	0.920048	0.981635	51610.1	53932.8	46469.7	38888.3	43888	47765.6	PABPC1
ENSG00000070759	-0.304635	0.182379	0.537333	108.134	115.318	77.2035	106.758	78.134	102.654	TESK2
ENSG00000070761	-0.25402	0.0490024	0.277549	503.904	600.804	549.22	666.057	510.116	596.916	CFAP20
ENSG00000070770	-0.060228	0.591472	0.863345	1725.82	1811.64	1562.64	1625.94	1653.39	1715.66	CSNK2A2
ENSG00000070778	-0.235516	0.246592	0.612456	95.1578	118.777	103.59	128.488	108.669	115.011	PTPN21
ENSG00000070785	0.285078	0.0396013	0.247624	643.396	546.605	676.264	463.878	586.454	554.143	EIF2B3
ENSG00000070814	0.274484	0.0233349	0.187824	1158.11	946.757	1274.35	1089.31	1193.56	960.959	TCOF1
ENSG00000070831	-0.143167	0.270997	0.637426	8497.16	9507.93	7347.04	7505.19	7156.89	8388.19	CDC42
ENSG00000070882	0.263996	0.150501	0.491606	217.349	159.138	252.133	228.632	236.198	198.655	OSBPL3
ENSG00000070950	0.0140367	0.924728	0.983518	471.463	494.712	555.084	468.602	419.409	468.598	RAD18
ENSG00000070961	0.936219	0.0255906	0.19628	12475.4	6974.4	10049.2	2816.34	9404.82	6895.9	ATP2B1
ENSG00000071051	-0.40734	0.00655325	0.0908473	2648.2	3293.47	2363.01	4065.31	2634.1	2780.22	NCK2
ENSG00000071054	-0.0234929	0.846199	0.95815	2580.07	2579.65	2968.92	3047.8	2909.82	2969.37	MAP4K4
ENSG00000071073	-0.505793	0.203722	0.562692	1164.6	1471.45	610.787	1173.39	653.811	804.126	MGAT4A
ENSG00000071082	0.0125707	0.93914	0.98783	15300.9	14398.5	11408.5	10276.2	10988.2	12695.9	RPL31
ENSG00000071127	-0.0271553	0.782973	0.938387	14486.7	15178.1	14096	13969.3	13870.1	14113.1	WDR1
ENSG00000071189	0.00866723	0.944576	0.988251	870.477	818.754	868.784	842.728	746.314	807.928	SNX13
ENSG00000071205	0.541456	0.010704	0.12218	151.387	98.0199	134.862	112.427	136.51	79.8423	ARHGAP10
ENSG00000071242	0.0196018	0.902847	0.977863	567.703	499.325	437.812	420.419	424.797	490.46	RPS6KA2
ENSG00000071243	-0.26653	0.101504	0.4002	751.53	930.612	632.287	752.031	575.677	674.857	ING3
ENSG00000071246	0.269014	0.574179	0.855127	3719.8	2754.94	1380.87	1573.97	2106.03	1651.97	VASH1
ENSG00000071462	-0.019887	0.86031	0.961519	1618.76	1805.87	1877.32	1721.36	1744.09	1786.95	BUD23
ENSG00000071537	-0.119887	0.401535	0.749211	2402.73	2339.79	1856.79	2251.37	1808.76	2001.76	SEL1L
ENSG00000071539	-0.0344441	0.768898	0.933842	1501.98	1521.04	1668.18	1759.15	1643.51	1649.12	TRIP13
ENSG00000071553	0.165799	0.149558	0.489965	3359.72	3171.23	3746.81	3105.43	3872.57	3511.16	ATP6AP1
ENSG00000071564	-0.128103	0.255108	0.621703	2247.02	2541.6	2249.65	2617.94	2267.68	2233.68	TCF3
ENSG00000071575	-0.0862383	0.80705	0.945991	34.6028	29.9826	29.3178	49.1276	39.516	30.4161	TRIB2
ENSG00000071626	-0.115068	0.303725	0.67098	3385.67	3821.62	3780.04	4239.15	3860.9	3881.86	DAZAP1
ENSG00000071655	0.0295803	0.789024	0.941686	2372.46	2477.02	2525.24	2450.71	2367.37	2190.91	MBD3
ENSG00000071794	0.219434	0.179237	0.533991	548.238	422.062	629.355	611.261	655.607	539.886	HLTF
ENSG00000071859	0.164434	0.177035	0.531463	1318.15	1186.62	1234.28	1009.95	1228.59	1177.67	FAM50A
ENSG00000071889	0.023938	0.872321	0.965949	368.736	374.782	438.79	447.817	419.409	384.003	FAM3A
ENSG00000071894	0.112056	0.284381	0.653553	4518.91	4166.42	4533.51	4484.79	4966.45	4320.04	CPSF1
ENSG00000071967	-0.222777	0.296779	0.664288	135.167	148.76	174.93	225.798	190.395	209.111	CYBRD1
ENSG00000071994	0.123373	0.314796	0.682339	1749.61	1548.71	1633	1471.94	1439.64	1405.79	PDCD2
ENSG00000072042	-0.091821	0.479785	0.801482	555.808	585.813	577.561	610.316	618.785	671.055	RDH11
ENSG00000072062	0.0569036	0.667199	0.894377	848.85	871.8	773.013	750.141	798.404	706.224	PRKACA
ENSG00000072071	-0.0172071	0.888234	0.972549	1188.39	1075.91	1041.76	1216.85	1099.26	1075.02	ADGRL1
ENSG00000072110	-0.10194	0.353036	0.71136	8013.8	9209.26	8201.17	9483.52	9082.4	8458.53	ACTN1
ENSG00000072121	-0.34411	0.0463126	0.269547	217.349	249.086	198.384	304.213	202.071	230.022	ZFYVE26
ENSG00000072134	-0.154685	0.450185	0.779503	101.646	115.318	101.635	125.653	108.669	106.456	EPN2
ENSG00000072135	-0.110296	0.347326	0.707909	738.554	817.601	773.013	861.623	793.913	809.829	PTPN18
ENSG00000072163	-0.0897017	0.828434	0.952182	18.3827	36.9016	28.3405	43.4591	58.376	32.3171	LIMS2
ENSG00000072201	-0.287327	0.57503	NA	35.6842	16.1445	12.7044	29.2876	10.7771	25.6636	LNX1
ENSG00000072210	-0.0459152	0.76051	0.931109	249.789	262.924	263.86	254.141	254.16	275.646	ALDH3A2
ENSG00000072274	0.322691	0.00313417	0.0590978	7442.85	5544.47	7228.79	5793.28	6388.13	5499.61	TFRC
ENSG00000072310	-0.401786	0.00471897	0.0749979	1428.45	1720.54	1302.69	2124.77	1348.04	1542.67	SREBF1
ENSG00000072364	-0.0501024	0.740469	0.922197	1255.43	1176.24	1163.92	1495.56	1163.03	1036.05	AFF4
ENSG00000072401	0.14517	0.45308	0.781855	356.842	352.872	274.61	228.632	298.167	260.438	UBE2D1
ENSG00000072415	-0.243443	0.15946	0.5058	244.382	304.438	260.928	374.126	302.657	278.497	MPP5
ENSG00000072422	0.29659	0.273641	0.640151	89.7511	79.5691	154.407	139.825	140.102	93.1493	RHOBTB1
ENSG00000072501	0.134002	0.208955	0.56833	4940.63	4119.14	4936.14	4500.85	4797.61	4750.62	SMC1A
ENSG00000072506	0.1888	0.121859	0.442671	995.912	899.477	1091.6	848.397	1029.21	986.622	HSD17B10
ENSG00000072518	-0.0551923	0.642331	0.882497	1317.07	1426.48	1396.5	1570.2	1483.65	1364.92	MARK2
ENSG00000072571	-0.215701	0.184869	0.538972	735.31	762.249	874.648	998.614	876.538	1125.4	HMMR
ENSG00000072609	-0.103589	0.402221	0.749742	1689.05	1691.71	1712.16	2095.48	1772.83	1770.79	CHFR
ENSG00000072657	0.257206	0.107828	0.413583	1107.29	892.557	863.898	730.301	810.977	705.273	TRHDE
ENSG00000072682	-0.169701	0.344417	0.705389	197.885	201.806	205.225	277.76	231.708	233.824	P4HA2
ENSG00000072694	-0.200477	0.352695	0.71136	187.072	201.806	116.294	155.886	170.637	187.249	FCGR2B
ENSG00000072736	-0.483078	0.0233413	0.187824	432.535	487.793	359.632	776.595	410.428	415.37	NFATC3
ENSG00000072756	0.448521	0.0112845	0.125076	551.482	398.999	491.562	279.65	450.842	416.32	TRNT1
ENSG00000072778	0.0267652	0.803875	0.945694	4464.85	4633.46	4649.8	4298.67	4918.85	4844.71	ACADVL
ENSG00000255443	0.932337	0.000717102	0.0243596	78.9377	47.2802	74.2718	32.1219	86.2168	46.5747	CD44-AS1
ENSG00000072803	0.0630147	0.585029	0.860741	1318.15	1183.16	1321.26	1274.48	1183.69	1200.49	FBXW11
ENSG00000072818	-0.0243017	0.949636	0.988857	25.9521	29.9826	31.2723	30.2324	22.4523	20.9111	ACAP1
ENSG00000072832	-0.0638956	0.906133	NA	8.65071	14.9913	12.7044	12.2819	15.2676	11.406	CRMP1
ENSG00000072840	-0.0441355	0.892121	0.973884	49.7416	34.5953	51.7948	60.4648	35.0256	44.6737	EVC
ENSG00000072849	-0.143576	0.417878	0.759817	223.837	253.699	174.93	216.351	229.013	224.319	DERL2
ENSG00000072864	-0.367555	0.00788253	0.103067	430.373	547.758	431.949	637.715	482.275	549.391	NDE1
ENSG00000072952	-0.531091	0.315936	NA	16.2201	14.9913	9.7726	21.7295	8.98092	13.307	MRVI1
ENSG00000072954	-0.0537322	0.851351	0.958999	62.7176	81.8754	87.9534	91.642	64.6626	50.3767	TMEM38A
ENSG00000072958	-0.109672	0.317287	0.684151	2185.38	2450.5	2270.17	2611.32	2425.75	2363.9	AP1M1
ENSG00000073008	0.114844	0.372975	0.726999	1035.92	897.17	940.124	804.938	918.748	970.464	PVR
ENSG00000073050	0.182191	0.206768	0.566459	942.927	838.358	1054.46	1019.4	1226.79	983.771	XRCC1
ENSG00000073060	-0.0941158	0.377792	0.729442	1889.1	2125.3	1895.88	2098.32	2043.16	1998.91	SCARB1
ENSG00000073111	-0.0978564	0.424839	0.764057	4233.44	4718.79	4840.37	5489.07	4659.3	4489.23	MCM2
ENSG00000073150	-0.583379	0.03311	0.224489	67.043	130.309	124.112	156.831	140.102	210.061	PANX2
ENSG00000073169	-0.00690467	0.960859	0.991302	482.277	426.675	471.039	510.172	429.288	450.539	SELENOO
ENSG00000073282	0.824255	0.0528882	0.288411	32.4401	24.2167	81.1126	20.7848	67.3569	57.0302	TP63
ENSG00000073331	0.198939	0.289252	0.658283	309.263	198.346	245.292	265.478	312.536	289.903	ALPK1
ENSG00000073350	0.147817	0.346474	0.707578	320.076	312.51	395.79	348.617	412.224	357.389	LLGL2
ENSG00000073417	0.216934	0.107351	0.41275	467.138	382.854	476.903	406.248	487.664	441.984	PDE8A
ENSG00000073464	-0.18002	0.381186	0.731891	339.54	336.727	273.633	451.596	308.944	255.685	CLCN4
ENSG00000073536	0.262401	0.101203	0.399839	341.703	291.753	382.109	273.036	383.485	358.34	NLE1
ENSG00000073578	-0.198322	0.060335	0.30861	3166.16	3844.69	3544.52	4007.68	3510.64	3876.15	SDHA
ENSG00000073584	-0.164252	0.140864	0.475934	1195.96	1280.02	1119.94	1289.6	1086.69	1242.31	SMARCE1
ENSG00000073605	0.192853	0.625583	0.874903	29.1961	32.2889	26.386	18.8952	45.8027	38.0201	GSDMB
ENSG00000073614	-0.112207	0.386453	0.73663	996.994	912.161	910.806	1039.24	821.754	996.127	KDM5A
ENSG00000073670	0.296335	0.174203	0.527957	139.493	100.326	141.703	124.709	181.415	151.13	ADAM11
ENSG00000073711	0.18116	0.25786	0.624761	275.741	213.337	279.496	250.362	280.205	271.844	PPP2R3A
ENSG00000073712	-0.201388	0.498778	0.810922	50.8229	49.5865	35.1814	49.1276	52.0893	59.8817	FERMT2
ENSG00000073734	-0.149992	0.741197	NA	19.4641	11.5318	18.5679	28.3429	21.5542	25.6636	ABCB11
ENSG00000073737	-0.331941	0.112561	0.424125	586.085	635.399	702.65	1157.33	676.263	679.61	DHRS9
ENSG00000073756	0.00438319	0.992011	0.998104	3447.31	3753.58	2144.11	2093.59	1926.41	1648.17	PTGS2
ENSG00000073792	0.00678003	0.946091	0.988562	2524.92	2449.34	2430.45	2511.18	2497.59	2457.05	IGF2BP2
ENSG00000073803	-0.16231	0.269848	0.635469	463.894	513.163	392.858	425.143	439.167	512.321	MAP3K13
ENSG00000182050	0.930957	0.0009467	0.0289365	114.622	64.5778	152.453	44.4038	131.121	99.8028	MGAT4C
ENSG00000175471	0.930594	1.32026e-08	1.10159e-05	714.765	374.782	719.263	290.987	668.18	437.231	MCTP1
ENSG00000073921	-0.0164576	0.909694	0.980258	3359.72	3196.6	2633.72	2658.56	2502.98	2738.4	PICALM
ENSG00000073969	0.00364656	0.979877	0.995681	1640.39	1568.32	1337.87	1301.88	1242.96	1340.21	NSF
ENSG00000074054	-0.00104523	0.994576	0.999366	803.434	719.581	836.535	1019.4	869.353	770.858	CLASP1
ENSG00000074071	0.0248378	0.836454	0.953649	975.367	1019.41	1119.94	1095.92	1068.73	995.177	MRPS34
ENSG00000074181	-0.399164	0.253482	0.619551	25.9521	48.4334	29.3178	33.0667	44.0065	50.3767	NOTCH3
ENSG00000074201	-0.0223708	0.84647	0.95815	1227.32	1352.67	1329.07	1209.3	1211.53	1266.07	CLNS1A
ENSG00000074211	-0.209323	0.757069	NA	3.24401	9.2254	8.79534	7.5581	16.1657	16.1586	PPP2R2C
ENSG00000074219	-0.393169	0.304999	0.672348	16.2201	47.2802	33.2268	33.0667	36.8218	34.2181	TEAD2
ENSG00000074266	0.089539	0.521571	0.824949	526.612	513.163	544.334	433.646	482.275	513.272	EED
ENSG00000074276	-0.237778	0.680955	NA	6.48803	17.2976	12.7044	13.2267	13.4714	8.55453	CDHR2
ENSG00000074319	-0.135131	0.309337	0.676992	1557.13	1755.13	1340.8	1463.44	1338.16	1434.31	TSG101
ENSG00000074356	-0.0545741	0.693204	0.905595	456.325	483.18	480.812	467.657	405.039	442.934	NCBP3
ENSG00000074370	-0.316513	0.0285901	0.207321	945.09	1213.14	1002.67	1474.77	1080.4	1083.57	ATP2A3
ENSG00000074416	-0.584349	0.0189603	0.167269	127.598	181.048	70.3627	161.554	114.058	125.466	MGLL
ENSG00000074582	0.381975	0.00801034	0.104228	456.325	408.224	540.425	351.452	519.097	404.914	BCS1L
ENSG00000140403	0.930256	5.66575e-09	7.04103e-06	1335.45	637.706	1354.48	575.36	1268.11	863.057	DNAJA4
ENSG00000105976	0.922482	0.00196102	0.043852	204.373	113.011	171.998	45.3486	160.758	125.466	MET
ENSG00000074621	0.308504	0.0952974	0.392176	200.048	154.525	177.861	143.604	217.338	182.497	SLC24A1
ENSG00000074657	-0.0227714	0.868211	0.964519	396.851	374.782	398.722	410.972	366.422	393.508	ZNF532
ENSG00000074660	-0.358476	0.228756	0.592281	43.2535	56.5056	36.1586	63.2991	49.3951	45.6242	SCARF1
ENSG00000074695	0.114927	0.29201	0.660174	3114.25	2611.94	3079.35	2998.68	2937.66	2819.19	LMAN1
ENSG00000074696	0.133421	0.325024	0.691927	871.559	721.888	745.649	682.118	686.142	694.818	HACD3
ENSG00000074706	0.120869	0.349227	0.709083	1092.15	1096.67	1071.08	1007.12	1064.24	865.908	IPCEF1
ENSG00000074755	0.0762918	0.583003	0.860282	1198.12	1112.81	1117.99	1300.94	1260.92	979.018	ZZEF1
ENSG00000074800	-0.083131	0.424082	0.763086	36643.3	42763.2	41850.2	42423.6	41443.4	41865.9	ENO1
ENSG00000074842	-0.0844548	0.473856	0.797656	2354.07	2632.7	2244.77	2208.85	2145.54	2310.67	MYDGF
ENSG00000074855	-0.0993886	0.67333	0.898088	114.622	113.011	86.9761	142.659	128.427	97.9018	ANO8
ENSG00000235531	0.919938	0.000129989	0.00810914	257.358	132.615	250.179	104.869	334.09	207.21	MSC-AS1
ENSG00000074964	-0.521776	0.0122121	0.130232	548.238	651.544	347.905	747.307	401.447	462.895	ARHGEF10L
ENSG00000074966	-0.234179	0.594706	NA	16.2201	18.4508	30.2951	30.2324	16.1657	24.7131	TXK
ENSG00000075089	-0.0456471	0.760037	0.930828	308.181	287.141	311.746	316.495	274.816	318.419	ACTR6
ENSG00000075131	0.0155155	0.925207	0.983576	288.717	251.392	325.428	332.556	277.51	296.557	TIPIN
ENSG00000075142	0.115085	0.409716	0.754962	1153.79	1183.16	1175.64	909.806	1016.64	998.028	SRI
ENSG00000075151	-0.0114249	0.91548	0.980512	4285.34	4007.28	3879.72	4159.79	3782.76	3874.25	EIF4G3
ENSG00000075188	-0.0151288	0.911168	0.980412	437.942	434.747	491.562	473.326	459.823	495.212	NUP37
ENSG00000075213	0.672016	0.102382	0.401724	31.3588	11.5318	29.3178	26.4533	43.1084	26.6141	SEMA3A
ENSG00000075218	-0.435862	0.00634858	0.0890268	536.344	776.087	615.674	906.027	771.461	921.038	GTSE1
ENSG00000075223	1.04311	0.00826123	0.106046	88.6697	38.0548	76.2263	15.1162	89.8092	70.3372	SEMA3C
ENSG00000075234	-0.126977	0.336524	0.699597	457.406	533.92	465.176	488.442	442.759	469.549	TTC38
ENSG00000075239	-0.156199	0.182892	0.537798	1068.36	1239.66	1223.53	1231.03	1075.91	1282.23	ACAT1
ENSG00000075240	-0.485081	0.0169319	0.157338	1803.67	2425.13	1194.21	2185.24	1317.5	1429.56	GRAMD4
ENSG00000075275	0.260047	0.0586833	0.304719	1015.38	719.581	854.125	888.077	971.735	763.254	CELSR1
ENSG00000075292	0.359433	0.00349	0.0627073	3633.3	2752.63	3464.39	2367.57	3188.23	2897.13	ZNF638
ENSG00000075303	-0.0205187	0.905937	0.978275	1085.66	1131.26	866.83	875.795	792.117	777.512	SLC25A40
ENSG00000075336	0.34886	0.0248659	0.193687	413.071	328.655	419.245	270.202	378.097	351.686	TIMM21
ENSG00000075340	-0.405668	0.0211336	0.178452	373.062	482.027	459.312	708.572	467.008	530.381	ADD2
ENSG00000075391	-0.432384	0.00719707	0.0970514	906.161	1057.46	832.625	1488	907.073	1023.69	RASAL2
ENSG00000075399	-0.0642303	0.699845	0.909199	604.468	689.599	501.334	466.713	546.938	573.153	VPS9D1
ENSG00000075407	0.276459	0.123574	0.446077	260.602	214.491	259.951	175.726	264.039	257.586	ZNF37A
ENSG00000075413	0.142858	0.252131	0.617471	2411.38	2069.95	2028.79	1797.88	2158.11	2108.22	MARK3
ENSG00000075415	-0.155723	0.134912	0.465604	8803.17	10452.4	8868.63	9187.81	8512.12	9529.75	SLC25A3
ENSG00000110911	0.915411	2.21101e-05	0.00250609	1472.78	837.205	1605.64	504.503	1506.1	1089.28	SLC11A2
ENSG00000075426	-0.361681	0.0569064	0.300302	1657.69	2063.03	1294.87	2166.34	1339.95	1286.03	FOSL2
ENSG00000075539	0.196657	0.136247	0.468064	1412.23	1058.61	1326.14	1373.68	1384.86	1163.42	FRYL
ENSG00000075568	0.0073518	0.950516	0.988857	1433.85	1346.91	1360.35	1453.04	1286.07	1258.47	TMEM131
ENSG00000075618	0.120935	0.298853	0.666281	12104.5	11581.3	10865.2	9645.08	12052.4	10981.2	FSCN1
ENSG00000075624	-0.107061	0.359041	0.715751	181785	229921	191965	193535	193761	187775	ACTB
ENSG00000075643	0.184524	0.488331	0.806245	74.6123	68.0373	68.4082	69.9124	66.4588	46.5747	MOCOS
ENSG00000075651	0.0808465	0.617673	0.872808	247.626	246.779	252.133	222.964	282.899	270.893	PLD1
ENSG00000075702	-0.135553	0.384491	0.735381	444.43	589.272	592.22	650.941	596.333	555.094	WDR62
ENSG00000075711	0.193874	0.13783	0.470235	1379.79	1150.87	1257.73	1100.65	1102.86	1017.99	DLG1
ENSG00000075785	-0.0901092	0.500835	0.81282	7248.21	8166.79	6325.8	6262.83	6283.05	6708.65	RAB7A
ENSG00000075790	-0.139932	0.22359	0.586271	1117.02	1205.07	1126.78	1205.52	1003.17	1166.27	BCAP29
ENSG00000075826	0.121169	0.597984	0.86666	134.086	144.147	108.476	129.432	158.064	96.0008	SEC31B
ENSG00000075856	0.120912	0.260609	0.626984	1702.03	1472.6	1647.66	1540.91	1568.07	1507.5	SART3
ENSG00000171509	0.89905	2.99287e-07	0.000120952	1011.05	537.38	1306.6	513.951	1060.65	759.452	RXFP1
ENSG00000075914	-0.0896106	0.549753	0.841828	511.473	599.651	466.153	466.713	466.11	471.45	EXOSC7
ENSG00000075945	-0.128377	0.409332	0.754672	257.358	284.834	309.791	305.158	272.122	326.973	KIFAP3
ENSG00000075975	0.0168118	0.905344	0.978111	519.042	512.01	578.538	570.636	484.97	480.955	MKRN2
ENSG00000076003	-0.13084	0.270363	0.636345	3757.65	4145.66	3916.86	4342.13	3419.04	3658.49	MCM6
ENSG00000076043	0.112031	0.54253	0.837799	173.014	202.959	231.611	171.947	220.033	204.358	REXO2
ENSG00000076053	0.0863475	0.631439	0.87801	439.023	432.441	378.2	288.153	346.663	376.399	RBM7
ENSG00000076067	0.118371	0.457061	0.784656	298.449	254.852	251.156	280.594	298.167	245.23	RBMS2
ENSG00000076108	-0.155227	0.311434	0.679686	2079.41	2022.67	2047.36	2928.76	2234.45	2131.03	BAZ2A
ENSG00000076201	-0.0613212	0.654988	0.888124	657.454	736.879	720.241	833.28	788.525	691.016	PTPN23
ENSG00000076242	8.18997e-05	0.999492	0.999917	1115.94	1089.75	1297.8	1231.03	1231.28	1323.1	MLH1
ENSG00000076248	-0.224412	0.124048	0.446735	1022.95	1200.46	1036.87	1299.05	900.786	959.058	UNG
ENSG00000076258	0.638018	0.0146268	0.145613	100.564	71.4969	94.7942	42.5143	90.7073	70.3372	FMO4
ENSG00000076321	0.06184	0.696082	0.906792	312.507	269.843	330.314	283.429	278.409	327.924	KLHL20
ENSG00000076351	0.607467	0.124409	0.446888	36.7655	20.7572	35.1814	29.2876	27.8409	15.2081	SLC46A1
ENSG00000076356	0.573696	0.32963	NA	8.65071	14.9913	21.4997	4.72381	19.758	14.2575	PLXNA2
ENSG00000076382	-0.24203	0.068739	0.331287	1247.86	1403.41	1377.94	1770.48	1459.4	1656.73	SPAG5
ENSG00000146281	0.894165	4.06716e-08	2.46803e-05	893.185	438.207	965.533	407.193	783.136	575.054	PM20D2
ENSG00000076554	0.524738	0.00360943	0.0639919	4450.79	3070.91	3664.72	1939.6	3288.81	2917.09	TPD52
ENSG00000076555	-0.248911	0.298273	0.665924	141.655	137.228	172.975	264.533	198.478	207.21	ACACB
ENSG00000076604	0.261788	0.0580126	0.303118	581.76	590.426	708.513	529.067	671.773	518.975	TRAF4
ENSG00000076641	-0.560561	0.0174315	0.159763	1153.79	1464.53	704.604	1585.31	766.971	821.235	PAG1
ENSG00000076650	-0.166979	0.282154	0.650337	246.545	256.005	230.633	293.821	257.752	274.695	GPATCH1
ENSG00000076662	0.178376	0.631444	0.87801	45.4162	29.9826	26.386	27.3981	26.9428	29.4656	ICAM3
ENSG00000076685	-0.229769	0.0547313	0.294503	1221.91	1397.65	1207.89	1476.66	1107.35	1272.72	NT5C2
ENSG00000050344	0.893429	9.07552e-06	0.00144902	3420.27	1729.76	2987.48	1079.86	2564.95	2020.77	NFE2L3
ENSG00000076770	-0.0567842	0.725409	0.917103	413.071	389.773	495.471	530.956	413.122	452.44	MBNL3
ENSG00000272645	0.891011	0.000135263	0.00821611	150.306	87.6413	182.748	80.3048	214.644	127.367	GTF2IP20
ENSG00000076864	-0.319794	0.279763	0.64818	47.5789	44.9738	40.0677	70.8572	52.0893	57.9807	RAP1GAP
ENSG00000076924	-0.0685934	0.524939	0.827563	1535.5	1590.23	1468.82	1651.44	1605.79	1593.04	XAB2
ENSG00000076928	-0.27319	0.0231032	0.186984	3941.48	4959.81	3692.09	5052.59	4097.1	4165.11	ARHGEF1
ENSG00000076944	-0.204984	0.0790376	0.35623	2201.6	2881.78	2396.24	2822.95	2622.43	2620.54	STXBP2
ENSG00000076984	-0.303064	0.0152675	0.148389	715.846	824.52	707.536	970.271	720.27	848.799	MAP2K7
ENSG00000077044	-0.285013	0.11122	0.421574	1035.92	1071.3	1152.19	1770.48	1130.7	1200.49	DGKD
ENSG00000077097	-0.226638	0.124222	0.446834	4239.93	4331.33	4733.85	6330.85	4654.81	5282.9	TOP2B
ENSG00000077147	-0.0108923	0.929052	0.984624	5064.99	4980.56	4452.4	4255.21	4194.09	4579.52	TM9SF3
ENSG00000077150	0.408392	0.0472346	0.272272	15135.5	12435.8	14958.9	7025.25	14951.4	14480	NFKB2
ENSG00000077152	0.220005	0.0764445	0.350579	595.817	522.388	576.583	506.393	619.683	510.42	UBE2T
ENSG00000077157	0.19509	0.265825	0.631717	517.961	395.539	362.563	361.844	369.116	333.627	PPP1R12B
ENSG00000077232	0.279516	0.0283971	0.207159	1509.55	1214.29	1316.37	1026.96	1295.95	1154.86	DNAJC10
ENSG00000077235	0.117047	0.406345	0.75313	1308.42	1104.74	1448.3	1501.23	1471.97	1291.73	GTF3C1
ENSG00000077238	-0.388867	0.00369144	0.0649285	809.922	1027.48	687.991	1083.64	808.283	908.681	IL4R
ENSG00000077254	-0.239603	0.0694802	0.333798	981.855	1044.78	902.011	1199.85	849.595	980.919	USP33
ENSG00000077274	-0.44049	0.361353	NA	14.0574	16.1445	23.4542	31.1772	11.6752	19.0101	CAPN6
ENSG00000077312	-0.115488	0.434229	0.770975	1139.73	1363.05	1517.68	1670.34	1449.52	1416.25	SNRPA
ENSG00000077327	-0.446022	0.0651728	0.321797	67.043	109.552	106.521	138.88	85.3187	104.555	SPAG6
ENSG00000077348	0.140369	0.319197	0.686417	536.344	487.793	463.221	427.977	473.294	421.073	EXOSC5
ENSG00000077380	0.086247	0.452262	0.781478	1558.21	1454.15	1567.52	1348.18	1396.53	1457.12	DYNC1I2
ENSG00000077420	-0.0709083	0.604402	0.868543	2433.01	2708.81	2063	2052.97	2310.79	2389.57	APBB1IP
ENSG00000077454	-0.180231	0.209052	0.56833	708.277	867.188	653.787	842.728	734.639	667.253	LRCH4
ENSG00000077458	-0.00589593	0.963174	0.991744	665.023	656.157	639.128	614.096	576.575	617.827	FAM76B
ENSG00000077463	-0.0568452	0.664463	0.893492	449.837	478.568	465.176	512.061	498.441	480.004	SIRT6
ENSG00000077514	-0.156689	0.184254	0.538573	1052.14	1138.18	1023.19	1249.92	1031.01	1074.07	POLD3
ENSG00000077549	-0.043517	0.690386	0.904291	8467.96	9326.88	8327.23	7850.98	8202.27	8586.85	CAPZB
ENSG00000077585	0.491479	0.00268543	0.0533489	608.793	439.36	715.354	391.132	637.645	564.599	GPR137B
ENSG00000077684	-0.330875	0.046499	0.270249	266.009	311.357	264.837	403.414	277.51	301.31	JADE1
ENSG00000077713	0.122988	0.447505	0.777688	316.832	275.609	294.155	260.754	246.975	250.933	SLC25A43
ENSG00000077721	0.0820394	0.549643	0.841781	2502.22	2407.83	2334.67	1847.96	2221.88	2413.33	UBE2A
ENSG00000077782	0.147242	0.220701	0.583321	1242.46	1078.22	1064.24	1041.13	1233.98	1077.87	FGFR1
ENSG00000077935	-0.083896	0.742326	0.922638	91.9137	116.471	120.203	161.554	179.618	137.823	SMC1B
ENSG00000077942	-0.0906166	0.650618	0.886489	131.923	142.994	158.316	164.389	177.822	191.051	FBLN1
ENSG00000077984	0.452568	0.199919	0.558138	36.7655	33.4421	39.0904	22.6743	34.1275	24.7131	CST7
ENSG00000078043	-0.198602	0.170818	0.523298	426.047	418.603	393.836	491.276	358.339	440.083	PIAS2
ENSG00000078061	-0.134558	0.221596	0.584531	1413.31	1681.33	1565.57	1586.26	1517.78	1670.03	ARAF
ENSG00000078070	-0.0352961	0.835472	0.953444	387.119	455.504	576.583	549.852	496.645	491.41	MCCC1
ENSG00000078081	0.510236	0.109866	0.417746	143.818	93.4072	163.202	58.5753	172.434	184.398	LAMP3
ENSG00000078098	-0.207851	0.745376	NA	6.48803	6.91905	14.6589	9.44762	7.18474	16.1586	FAP
ENSG00000078114	-0.354642	0.215759	0.578257	42.1722	48.4334	55.7038	70.8572	52.9874	73.1887	NEBL
ENSG00000078124	0.088467	0.583819	0.860643	592.573	571.975	518.925	435.535	455.333	466.697	ACER3
ENSG00000078140	-0.186414	0.118927	0.437015	2408.14	2767.62	2283.86	2709.58	2162.61	2323.03	UBE2K
ENSG00000078142	-0.292407	0.0248568	0.193687	692.056	778.393	593.197	743.528	574.779	754.7	PIK3C3
ENSG00000078177	0.0235735	0.860975	0.961656	670.43	681.526	690.923	728.412	662.792	581.708	N4BP2
ENSG00000078237	-0.045207	0.840809	0.955981	89.7511	119.93	93.817	95.421	119.446	98.8523	TIGAR
ENSG00000078246	-0.1355	0.538098	0.836355	84.3444	87.6413	91.8624	96.3658	81.7264	98.8523	TULP3
ENSG00000132330	0.890902	0.000561982	0.0206111	129.761	78.4159	186.657	73.6915	202.071	127.367	SCLY
ENSG00000145703	0.888499	4.02327e-07	0.000138722	267.091	128.002	251.156	128.488	225.421	144.476	IQGAP2
ENSG00000078319	-0.000419529	0.998059	0.999553	181.665	198.346	227.702	196.511	189.497	204.358	PMS2P1
ENSG00000078369	-0.079488	0.467813	0.793054	13584.9	14735.3	12588.1	13367.4	12428.7	12686.4	GNB1
ENSG00000078399	-0.389836	0.0243839	0.192234	517.961	678.067	650.855	974.05	612.499	681.511	HOXA9
ENSG00000078401	-0.291105	0.445859	0.776241	42.1722	66.8842	43.9767	46.2934	26.9428	25.6636	EDN1
ENSG00000078403	-0.541016	0.00608999	0.0868604	865.071	1050.54	712.422	1512.56	755.295	829.789	MLLT10
ENSG00000078487	-0.0162602	0.942687	0.988106	92.9951	83.0286	85.0216	107.703	107.771	97.9018	ZCWPW1
ENSG00000078596	-0.253558	0.451111	0.780296	35.6842	31.1357	28.3405	39.68	34.1275	45.6242	ITM2A
ENSG00000078618	0.0713206	0.482835	0.802858	9225.98	8587.69	8884.27	8064.49	8377.4	8557.38	NRDC
ENSG00000078668	-0.103743	0.311759	0.679801	2414.63	2601.56	2506.67	2759.65	2463.47	2573.96	VDAC3
ENSG00000078674	-0.355822	0.0128069	0.133572	4399.97	4853.71	3762.45	5994.52	3747.74	4391.32	PCM1
ENSG00000078687	-0.308132	0.126427	0.451403	232.488	238.707	226.724	388.297	256.854	258.537	TNRC6C
ENSG00000078699	-0.231175	0.18637	0.540408	294.124	282.528	235.52	373.181	273.918	286.101	CBFA2T2
ENSG00000078747	-0.277189	0.0652223	0.321892	748.286	863.728	607.856	767.147	572.085	705.273	ITCH
ENSG00000078804	-0.269555	0.140379	0.474686	2938	3932.33	2201.77	2537.63	2365.57	2578.72	TP53INP2
ENSG00000078808	0.12163	0.274318	0.641244	4864.94	4535.44	5082.73	4411.1	5334.67	5100.4	SDF4
ENSG00000078814	0.249695	0.536861	0.836105	18.3827	27.6762	32.2496	23.6191	45.8027	30.4161	MYH7B
ENSG00000078900	-0.606052	0.00363667	0.0641341	256.277	351.718	217.929	503.558	280.205	292.755	TP73
ENSG00000078902	-0.161317	0.154451	0.496847	1273.82	1466.84	1209.85	1414.31	1253.74	1299.34	TOLLIP
ENSG00000078967	0.0792443	0.633566	0.878947	223.837	230.635	233.565	189.897	211.052	212.913	UBE2D4
ENSG00000079102	0.632263	0.0321951	0.22132	96.2391	63.4246	95.7715	40.6248	57.4779	57.0302	RUNX1T1
ENSG00000079134	0.263102	0.0434138	0.260015	743.961	598.498	799.399	623.543	787.627	719.531	THOC1
ENSG00000079150	0.0352362	0.87738	0.968427	76.775	78.4159	90.8852	85.0286	82.6245	80.7928	FKBP7
ENSG00000079215	0.648187	0.00518171	0.0795124	140.574	78.4159	104.567	65.1886	111.363	83.6443	SLC1A3
ENSG00000079246	-0.000685659	0.994615	0.999366	10317	9683.21	9967.07	9828.36	9196.46	9981.23	XRCC5
ENSG00000079277	-0.166322	0.235717	0.600292	1255.43	1399.95	1049.58	1340.62	1110.04	1092.13	MKNK1
ENSG00000079308	-0.19062	0.232165	0.596153	496.334	505.091	493.516	707.627	544.244	537.034	TNS1
ENSG00000079313	0.0842964	0.498823	0.810922	1247.86	1305.39	1304.64	1315.11	1402.82	1112.09	REXO1
ENSG00000079332	-0.0052965	0.963671	0.991744	2583.32	2592.34	2454.88	2230.58	2349.41	2592.02	SAR1A
ENSG00000205213	0.882367	5.4474e-07	0.000165279	1295.44	630.787	1729.75	773.76	1348.93	966.662	LGR4
ENSG00000079337	-0.0921142	0.820163	NA	19.4641	18.4508	24.4315	25.5086	26.9428	31.3666	RAPGEF3
ENSG00000079387	0.077565	0.600551	0.867585	364.411	324.042	349.859	302.324	320.619	353.587	SENP1
ENSG00000079432	-0.103777	0.352536	0.71136	2894.74	3236.96	2885.85	3335.96	2986.16	2848.66	CIC
ENSG00000079435	0.0277274	0.935375	0.986901	29.1961	27.6762	42.0222	44.4038	42.2103	38.9706	LIPE
ENSG00000251136	0.881137	9.11742e-06	0.00144902	416.315	266.383	514.039	177.615	448.148	305.112	AF117829.1
ENSG00000079462	0.0566922	0.716722	0.914392	271.416	283.681	326.405	288.153	329.6	320.32	PAFAH1B3
ENSG00000204389	0.879782	0.000247482	0.0121915	431.454	317.123	702.65	191.787	490.358	374.498	HSPA1A
ENSG00000079616	-0.222855	0.0976405	0.395733	1424.12	1666.34	1618.34	1958.49	1783.61	2007.46	KIF22
ENSG00000079691	-0.143325	0.596607	0.86666	76.775	73.8032	74.2718	84.0839	49.3951	62.7332	CARMIL1
ENSG00000079739	-0.349792	0.0630356	0.315784	261.684	336.727	283.405	453.486	387.078	398.261	PGM1
ENSG00000079785	0.0439065	0.668393	0.89517	2371.37	2231.39	2321.97	2220.19	2211.1	2245.09	DDX1
ENSG00000079805	-0.0179698	0.866496	0.963435	5167.72	5538.7	5098.37	4782.39	5168.52	5308.56	DNM2
ENSG00000079819	0.0148439	0.89189	0.973816	3315.38	3140.1	3557.23	3581.59	3468.43	3512.11	EPB41L2
ENSG00000079931	0.718066	0.00554488	0.0829867	158.957	93.4072	246.27	113.371	236.198	182.497	MOXD1
ENSG00000079950	-0.486829	0.00415895	0.0696637	407.664	532.767	343.018	579.139	334.988	408.716	STX7
ENSG00000079974	0.0161422	0.914673	0.980434	298.449	311.357	294.155	262.644	292.778	302.26	RABL2B
ENSG00000079999	-0.0673254	0.617245	0.872808	2594.13	2769.93	3018.76	2835.23	3067.88	3490.25	KEAP1
ENSG00000080031	-0.572204	0.0158661	0.151403	84.3444	101.479	89.9079	171.002	99.6882	134.021	PTPRH
ENSG00000080189	0.0286528	0.799737	0.944407	1268.41	1297.32	1374.03	1244.25	1352.53	1375.38	SLC35C2
ENSG00000080200	0.326551	0.0753615	0.348173	352.516	202.959	338.132	287.208	273.918	276.596	CRYBG3
ENSG00000086758	0.877193	1.17079e-09	2.60501e-06	10957.2	4796.05	9916.26	5525.92	10758.2	6896.85	HUWE1
ENSG00000080345	0.21267	0.132525	0.461815	3594.37	2659.22	3049.05	2752.09	2550.58	2520.73	RIF1
ENSG00000080371	0.105135	0.405265	0.752264	2243.78	2225.63	2208.61	1756.31	2069.2	2082.55	RAB21
ENSG00000080493	-0.139755	0.716963	0.914392	19.4641	31.1357	31.2723	22.6743	28.7389	34.2181	SLC4A4
ENSG00000080503	-0.351073	0.0327126	0.223768	3002.88	3408.79	3403.8	5321.85	3498.07	3901.82	SMARCA2
ENSG00000080546	0.436154	0.0122308	0.130232	702.87	452.045	859.989	549.852	751.703	707.174	SESN1
ENSG00000080561	0.360836	0.0356103	0.23488	325.483	245.626	266.792	229.577	266.733	193.903	MID2
ENSG00000080573	0.334902	0.600359	NA	5.40669	12.6849	16.6134	9.44762	12.5733	5.70302	COL5A3
ENSG00000080603	0.0761558	0.64674	0.884062	453.081	407.071	364.518	409.082	373.606	313.666	SRCAP
ENSG00000080608	0.38046	0.0133225	0.136497	2983.41	2274.06	2706.03	1722.3	2185.06	2053.09	PUM3
ENSG00000080709	0.439697	0.00326924	0.0606171	1210.02	862.575	1486.41	948.541	1349.83	1171.02	KCNN2
ENSG00000080802	0.253697	0.158808	0.504813	663.942	522.388	681.15	438.37	669.078	728.085	CNOT4
ENSG00000080815	0.0109253	0.947703	0.988562	6174.44	6072.62	4902.91	4104.05	4587.45	5370.34	PSEN1
ENSG00000080819	0.412076	0.00946867	0.11438	384.956	292.906	456.38	282.484	404.141	360.241	CPOX
ENSG00000080822	0.302099	0.0918345	0.385334	926.707	759.942	983.123	546.073	790.321	883.968	CLDND1
ENSG00000080823	-0.0217725	0.936071	0.987089	56.2296	55.3524	52.772	49.1276	53.8855	60.8322	MOK
ENSG00000278619	0.874074	0.000846767	0.0273052	180.583	102.633	214.02	68.0229	207.459	157.784	MRM1
ENSG00000080839	-0.205176	0.184242	0.538573	939.683	1017.1	1025.15	1395.41	987.003	989.474	RBL1
ENSG00000080845	-0.155263	0.260311	0.626605	706.114	814.142	771.058	928.701	898.99	903.929	DLGAP4
ENSG00000080947	-0.215985	0.617433	NA	21.6268	32.2889	17.5907	22.6743	21.5542	16.1586	CROCCP3
ENSG00000153976	0.873071	0.00205521	0.045201	65.9616	31.1357	79.1581	40.6248	69.1531	44.6737	HS3ST3A1
ENSG00000081014	-0.254775	0.0782236	0.354394	453.081	475.108	429.994	545.128	373.606	477.153	AP4E1
ENSG00000081019	0.257274	0.105489	0.408789	418.478	329.808	417.29	291.932	342.173	363.092	RSBN1
ENSG00000081026	0.275508	0.0597364	0.306932	299.531	254.852	304.905	248.473	303.555	247.131	MAGI3
ENSG00000081041	-0.161177	0.365653	0.721421	5767.86	6605.39	4194.4	4213.64	4363.83	5201.15	CXCL2
ENSG00000081052	0.231046	0.598611	0.866673	19.4641	13.8381	39.0904	30.2324	40.4141	39.9211	COL4A4
ENSG00000081059	-0.145703	0.462529	0.788837	141.655	153.372	157.339	210.682	181.415	167.289	TCF7
ENSG00000081087	0.370757	0.0271556	0.202756	2938	2280.98	2386.47	1570.2	2112.31	1901.01	OSTM1
ENSG00000081154	-0.0254818	0.839411	0.955177	1805.83	1790.88	1610.52	1578.7	1477.36	1611.1	PCNP
ENSG00000081177	0.023061	0.904982	0.978102	158.957	134.921	144.634	172.892	147.287	134.971	EXD2
ENSG00000081181	0.604661	0.251548	NA	17.3014	6.91905	14.6589	11.3371	17.9618	14.2575	ARG2
ENSG00000081189	0.0504147	0.696702	0.906792	4587.04	4392.44	5146.25	5314.29	4618.89	4151.8	MEF2C
ENSG00000081237	-0.0758789	0.433482	0.7705	4589.2	4756.85	4626.35	4778.61	4425.8	4841.86	PTPRC
ENSG00000081307	-0.0546761	0.675476	0.899725	430.373	448.585	441.721	433.646	416.715	456.242	UBA5
ENSG00000081320	0.0104491	0.931597	0.985875	1384.11	1338.84	1235.26	1189.46	1185.48	1248.96	STK17B
ENSG00000081377	-0.0448675	0.768324	0.93381	344.947	318.276	352.791	407.193	338.581	342.181	CDC14B
ENSG00000081386	0.339378	0.0744015	0.346107	196.804	137.228	193.497	135.101	188.599	184.398	ZNF510
ENSG00000081665	0.0826566	0.575112	0.855417	392.526	334.421	422.176	405.303	414.02	419.172	ZNF506
ENSG00000081692	0.0989719	0.455867	0.78375	469.301	439.36	449.54	434.591	444.556	399.211	JMJD4
ENSG00000081721	-0.339225	0.0345269	0.230352	290.88	388.62	272.656	364.678	265.835	296.557	DUSP12
ENSG00000081760	-0.062706	0.677848	0.900513	560.133	611.183	654.764	734.08	749.907	707.174	AACS
ENSG00000081791	-0.0753071	0.518317	0.823535	949.415	1050.54	1048.6	1111.04	1014.84	1013.24	KIAA0141
ENSG00000081870	-0.192018	0.13117	0.459935	1078.09	1225.83	1003.65	1061.91	1070.53	1313.6	HSPB11
ENSG00000241058	0.868493	0.000937777	0.0288832	134.086	69.1905	102.612	43.4591	100.586	72.2382	NSUN6
ENSG00000081923	0.152096	0.485519	0.803991	233.569	174.129	153.43	143.604	146.389	161.586	ATP8B1
ENSG00000126016	0.867449	0.000938975	0.0288832	123.273	50.7397	94.7942	52.9067	78.134	57.9807	AMOT
ENSG00000082014	-0.0723052	0.69773	0.907545	179.502	216.797	230.633	239.97	265.835	254.735	SMARCD3
ENSG00000082068	-0.260591	0.0243522	0.19214	1159.19	1376.89	1071.08	1324.56	1057.05	1236.6	WDR70
ENSG00000082074	-0.231961	0.187918	0.542265	158.957	190.274	182.748	188.952	148.185	195.804	FYB1
ENSG00000082146	-0.0425149	0.770012	0.934188	353.598	418.603	405.563	393.966	371.81	353.587	STRADB
ENSG00000082153	-0.00880971	0.946355	0.988562	7389.87	7139.31	6542.76	6123.01	5685.82	6475.78	BZW1
ENSG00000082175	-0.28345	0.297501	0.665155	109.215	103.786	109.453	187.063	96.0958	91.2483	PGR
ENSG00000082196	-0.340674	0.359055	0.715751	20.5454	29.9826	24.4315	30.2324	32.3313	38.0201	C1QTNF3
ENSG00000082212	0.171247	0.129965	0.457646	1600.38	1361.9	1524.53	1330.23	1398.33	1324.05	ME2
ENSG00000082213	-0.0765203	0.489774	0.806651	1241.38	1255.81	1154.14	1266.93	1148.66	1213.79	C5orf22
ENSG00000082258	0.355922	0.00770671	0.101417	907.243	643.472	938.17	662.278	811.875	768.957	CCNT2
ENSG00000082269	0.342136	0.0527413	0.288118	261.684	189.121	260.928	177.615	204.765	206.259	FAM135A
ENSG00000082397	-0.229359	0.245757	0.612276	414.153	452.045	254.088	350.507	390.67	439.132	EPB41L3
ENSG00000082458	-0.116423	0.818512	NA	9.73204	14.9913	14.6589	13.2267	20.6561	20.9111	DLG3
ENSG00000082515	-0.184974	0.157844	0.503155	455.243	520.082	473.971	519.619	422.103	496.163	MRPL22
ENSG00000137872	0.866982	0.00107004	0.0309199	184.909	103.786	136.816	56.6857	186.803	118.813	SEMA6D
ENSG00000082641	0.118202	0.301488	0.668617	2761.74	2393.99	2639.58	2570.7	2978.97	2755.51	NFE2L1
ENSG00000082701	-0.210452	0.239042	0.604256	1204.61	1225.83	836.535	1190.4	831.633	906.78	GSK3B
ENSG00000047936	0.866563	0.000617574	0.0220197	213.024	74.9564	257.019	140.77	243.383	173.942	ROS1
ENSG00000082805	0.107098	0.480373	0.80169	481.195	373.629	373.313	410.972	399.651	378.3	ERC1
ENSG00000082898	0.306696	0.0112896	0.125076	4560	3549.47	5337.79	4057.75	4652.12	4154.65	XPO1
ENSG00000082996	-0.440392	0.00996192	0.118215	497.416	660.769	409.472	630.157	390.67	469.549	RNF13
ENSG00000083093	0.21823	0.142296	0.47872	325.483	279.068	316.632	250.362	309.842	288.953	PALB2
ENSG00000083097	0.238012	0.107023	0.412346	581.76	413.99	500.357	507.337	502.033	420.122	DOPEY1
ENSG00000083099	-0.115549	0.35168	0.711354	1574.43	1717.08	1397.48	1426.59	1419.88	1614.9	LYRM2
ENSG00000083123	-0.140814	0.304089	0.671092	365.492	392.08	357.677	428.922	389.772	405.865	BCKDHB
ENSG00000083168	0.0903003	0.45127	0.780393	2336.77	1918.88	2290.7	2336.4	2143.75	2102.51	KAT6A
ENSG00000083223	0.0983535	0.485908	0.803991	919.137	751.87	711.445	735.97	725.658	711.927	ZCCHC6
ENSG00000083290	0.216288	0.21226	0.572923	194.641	181.048	220.861	185.173	193.988	158.734	ULK2
ENSG00000083312	-0.104768	0.478459	0.800647	5023.9	5001.32	6035.56	6968.57	5163.13	5473	TNPO1
ENSG00000083444	-0.121673	0.340942	0.702808	1534.42	1744.75	1583.16	1967	1751.28	1586.39	PLOD1
ENSG00000083457	0.0135346	0.939761	0.98783	183.827	189.121	186.657	157.775	159.86	178.695	ITGAE
ENSG00000083520	-0.0265303	0.811174	0.946518	1571.18	1572.93	1637.89	1732.69	1559.99	1551.22	DIS3
ENSG00000083535	0.148929	0.334313	0.697901	275.741	257.158	274.61	235.246	252.364	231.923	PIBF1
ENSG00000083544	-0.165025	0.295706	0.663363	246.545	272.149	254.088	309.882	244.281	252.834	TDRD3
ENSG00000083635	0.0457332	0.782203	0.938325	349.272	319.429	298.064	257.92	287.389	327.924	NUFIP1
ENSG00000083642	-0.227135	0.0836504	0.366382	978.611	1002.11	940.124	1269.76	936.71	1068.37	PDS5B
ENSG00000083720	-0.0118265	0.932378	0.986022	1108.37	1073.61	1357.41	1341.56	1238.47	1318.35	OXCT1
ENSG00000083750	0.0853289	0.687185	0.903618	152.469	124.543	120.203	128.488	110.465	107.407	RRAGB
ENSG00000083799	0.134911	0.363517	0.719669	2413.55	2146.06	1982.86	1601.37	1971.31	2052.14	CYLD
ENSG00000083807	0.156878	0.564506	0.850711	52.9856	50.7397	68.4082	51.9619	55.6817	56.0797	SLC27A5
ENSG00000083812	-0.0668513	0.686025	0.903087	270.335	239.86	213.043	252.252	222.727	246.18	ZNF324
ENSG00000083814	0.441457	0.0279199	0.205513	177.339	122.237	193.497	121.874	197.58	173.942	ZNF671
ENSG00000083817	0.588806	0.0112631	0.125048	137.33	86.4881	106.521	66.1334	104.179	78.8918	ZNF416
ENSG00000083828	0.214362	0.255239	0.621761	195.722	168.364	227.702	153.052	195.784	211.962	ZNF586
ENSG00000083838	-0.558213	0.101164	0.399839	31.3588	61.1183	39.0904	44.4038	26.0447	37.0696	ZNF446
ENSG00000083844	0.197062	0.275384	0.642614	444.43	332.114	427.063	320.274	440.963	491.41	ZNF264
ENSG00000083845	7.00506e-05	0.999489	0.999917	14959.2	15812.3	14675.5	13406.2	13960.8	14376.4	RPS5
ENSG00000083857	0.358256	0.0445373	0.263318	2536.82	1551.02	2225.22	2513.07	2544.29	1633.92	FAT1
ENSG00000083896	-0.0111498	0.919112	0.981428	1764.74	1645.58	1694.57	1791.27	1615.67	1675.74	YTHDC1
ENSG00000083937	-0.0895828	0.59999	0.867244	551.482	619.255	521.857	425.143	441.861	568.401	CHMP2B
ENSG00000084070	-0.330243	0.00414103	0.069538	18071.3	22431.6	17249.6	24618.6	17935.8	19905.4	SMAP2
ENSG00000084072	0.0837884	0.400571	0.748688	3873.35	3608.28	3983.31	3675.13	3959.69	3865.7	PPIE
ENSG00000084073	0.217003	0.0921655	0.385829	19173.2	16619.6	17824.2	13257.9	15916	15647.2	ZMPSTE24
ENSG00000084090	0.173965	0.122282	0.443137	4657.32	4160.66	5354.41	4284.5	4609.01	4513.94	STARD7
ENSG00000084092	-0.080522	0.580573	0.858828	360.086	366.71	414.358	426.088	357.441	403.013	NOA1
ENSG00000084093	0.0933095	0.513398	0.820364	626.095	482.027	586.356	609.372	613.397	617.827	REST
ENSG00000084110	-0.400927	0.0526597	0.287999	204.373	224.869	191.543	363.734	236.198	245.23	HAL
ENSG00000084112	-0.525848	0.00863123	0.108432	830.468	1039.01	558.993	1181.9	647.524	710.976	SSH1
ENSG00000084207	0.0393126	0.733518	0.919482	3826.86	4204.48	4342.94	3862.19	4522.79	4286.77	GSTP1
ENSG00000084234	-0.0911802	0.320571	0.687718	27918	30003.3	28081.6	29715.6	27904.6	29659.5	APLP2
ENSG00000084444	0.0327055	0.896993	0.975946	84.3444	79.5691	90.8852	115.261	94.2997	68.4362	FAM234B
ENSG00000084463	-0.126143	0.244844	0.610966	1374.38	1560.25	1445.37	1590.04	1410.9	1467.58	WBP11
ENSG00000084623	0.103916	0.404983	0.752112	4030.15	3903.5	3970.61	3130	3668.71	3825.78	EIF3I
ENSG00000084628	-0.422377	0.273781	0.640325	21.6268	29.9826	32.2496	38.7353	18.8599	28.5151	NKAIN1
ENSG00000084652	0.212481	0.0701002	0.335503	2125.91	1832.4	2284.83	1768.6	2194.94	2099.66	TXLNA
ENSG00000084676	-0.192737	0.199477	0.557699	510.392	525.848	416.313	565.913	431.084	459.093	NCOA1
ENSG00000084693	-0.0569661	0.694956	0.906558	356.842	379.395	415.335	444.983	400.549	395.409	AGBL5
ENSG00000084710	-0.10455	0.788243	0.941314	27.0335	19.604	37.1359	45.3486	27.8409	33.2676	EFR3B
ENSG00000084731	-0.439449	0.0429524	0.258127	98.4018	160.291	115.317	183.284	132.02	126.417	KIF3C
ENSG00000084733	0.246815	0.0370692	0.238264	2950.97	2390.53	2630.78	2096.43	2562.26	2376.26	RAB10
ENSG00000084754	-0.0959489	0.353293	0.711457	5882.48	6273.27	6389.33	6615.23	6250.72	6907.31	HADHA
ENSG00000084764	0.470379	0.096241	0.393765	61.6363	40.3611	59.6129	57.6305	75.4397	43.7231	MAPRE3
ENSG00000196730	0.862445	6.8441e-09	7.48547e-06	536.344	349.412	567.788	268.313	544.244	290.854	DAPK1
ENSG00000085063	0.308714	0.108768	0.415466	274.66	200.652	375.268	273.036	308.046	298.458	CD59
ENSG00000085117	-0.131708	0.410556	0.75511	2481.67	2895.62	3183.91	3548.53	3622.9	3732.63	CD82
ENSG00000085185	0.372942	0.0935463	0.388322	187.072	152.219	291.223	198.4	286.491	239.527	BCORL1
ENSG00000085224	0.0918816	0.423699	0.763086	1827.46	1571.78	1648.64	1564.53	1553.7	1581.64	ATRX
ENSG00000085231	-0.0352052	0.796786	0.943288	577.435	543.145	473.971	528.122	498.441	516.123	AK6
ENSG00000085274	0.0595758	0.719916	0.914914	397.932	351.718	399.699	320.274	299.065	379.251	MYNN
ENSG00000085365	-0.435203	0.0218696	0.181365	221.674	275.609	229.656	346.728	184.109	235.725	SCAMP1
ENSG00000085377	0.0283981	0.794347	0.943086	1907.48	1970.78	1986.77	1949.99	1907.55	1768.89	PREP
ENSG00000085382	-0.0125952	0.928912	0.984624	467.138	464.73	498.403	546.073	475.091	441.984	HACE1
ENSG00000085415	0.0371129	0.741601	0.92258	1344.1	1336.53	1328.1	1248.03	1239.37	1228.05	SEH1L
ENSG00000085433	0.0875659	0.635445	0.879797	367.655	290.6	328.359	270.202	239.791	318.419	WDR47
ENSG00000085449	-0.308923	0.0275112	0.204155	2169.16	2554.28	2287.77	3274.55	2174.28	2384.81	WDFY1
ENSG00000085465	-0.325534	0.489374	NA	23.7894	32.2889	14.6589	17.0057	14.3695	17.1091	OVGP1
ENSG00000085491	-0.248558	0.0345149	0.230352	1202.45	1352.67	1117.99	1430.37	1084	1260.37	SLC25A24
ENSG00000152380	0.862013	0.00064574	0.0226859	84.3444	46.127	111.408	53.8515	102.382	63.6837	FAM151B
ENSG00000085514	0.18423	0.457596	0.7849	135.167	125.696	96.7487	73.6915	110.465	102.654	PILRA
ENSG00000085552	-0.774499	0.0777383	NA	16.2201	21.9103	20.5225	28.3429	10.7771	30.4161	IGSF9
ENSG00000085563	-0.337354	0.283041	0.65182	52.9856	77.2627	42.0222	40.6248	42.2103	56.0797	ABCB1
ENSG00000085644	-0.179876	0.3238	0.689981	202.21	291.753	285.36	307.048	310.74	307.013	ZNF213
ENSG00000085662	0.113505	0.455687	0.783723	1044.57	1022.87	1321.26	1065.69	1329.18	1326.9	AKR1B1
ENSG00000085719	-0.0610946	0.670513	0.896315	1097.56	1028.63	982.146	1195.12	920.544	904.879	CPNE3
ENSG00000085721	0.0947025	0.53886	0.836355	1432.77	1331.92	1280.21	1108.21	1035.5	1070.27	RRN3
ENSG00000085733	-0.0562713	0.767049	0.933315	143.818	161.445	164.18	189.897	195.784	172.992	CTTN
ENSG00000085741	-0.0304341	0.950399	NA	15.1387	12.6849	14.6589	16.061	14.3695	16.1586	WNT11
ENSG00000085760	-0.145457	0.229539	0.593175	722.334	758.789	755.422	806.827	713.085	856.403	MTIF2
ENSG00000085788	-0.118246	0.312787	0.680637	971.042	1073.61	966.51	1013.73	888.213	979.969	DDHD2
ENSG00000085831	0.0854176	0.778455	0.937094	37.8468	46.127	63.5219	44.4038	53.8855	56.0797	TTC39A
ENSG00000085832	-0.26314	0.0175948	0.160238	1341.94	1612.14	1341.78	1595.7	1239.37	1499.89	EPS15
ENSG00000085840	-0.47285	0.00892324	0.110199	578.516	814.142	659.65	1146.94	684.346	707.174	ORC1
ENSG00000085871	0.222258	0.0844692	0.368224	686.65	623.868	762.263	566.857	663.69	620.679	MGST2
ENSG00000085872	0.00367687	0.974168	0.994508	1757.17	1774.74	1838.23	1971.72	1976.7	1811.66	CHERP
ENSG00000085978	0.130841	0.374554	0.728519	406.583	326.349	380.154	339.17	334.988	357.389	ATG16L1
ENSG00000085982	0.324107	0.0262762	0.199264	729.903	553.524	763.24	574.416	825.346	723.333	USP40
ENSG00000085998	0.187725	0.131603	0.460163	685.568	665.382	787.672	663.223	765.174	637.788	POMGNT1
ENSG00000085999	0.0279803	0.833468	0.953027	718.009	678.067	754.445	681.174	755.295	825.037	RAD54L
ENSG00000086015	0.208607	0.0630129	0.315784	1068.36	935.225	1055.44	915.475	1122.61	959.058	MAST2
ENSG00000162825	0.856751	0.000181789	0.00990565	108.134	64.5778	106.521	56.6857	123.039	65.5847	NBPF20
ENSG00000086062	0.138235	0.465665	0.791578	6071.71	5758.96	4359.56	3600.49	4310.84	4036.79	B4GALT1
ENSG00000086065	0.0958714	0.451881	0.780971	1838.27	1645.58	1881.23	1544.69	1792.59	1966.59	CHMP5
ENSG00000086102	0.0597089	0.57812	0.857486	1962.63	1781.66	2013.16	1898.03	1915.63	1971.34	NFX1
ENSG00000086189	-0.0758298	0.561051	0.848281	699.626	687.292	641.083	677.395	577.473	655.847	DIMT1
ENSG00000086200	0.0607952	0.651821	0.887123	430.373	385.16	397.745	416.64	419.409	393.508	IPO11
ENSG00000086205	-0.366826	0.493623	NA	9.73204	9.2254	17.5907	25.5086	26.9428	35.1686	FOLH1
ENSG00000086232	-0.196494	0.0963194	0.393765	1822.05	2184.11	2072.77	2394.97	1897.67	2058.79	EIF2AK1
ENSG00000086289	-0.0545882	0.771229	0.934301	256.277	238.707	306.86	370.347	312.536	299.409	EPDR1
ENSG00000086300	-0.179742	0.172583	0.52575	447.674	476.261	401.654	486.553	416.715	470.499	SNX10
ENSG00000086475	-0.0137782	0.915627	0.980512	838.037	847.584	984.101	982.553	861.27	878.265	SEPHS1
ENSG00000086504	-0.0642531	0.542126	0.837799	1336.53	1412.64	1331.03	1387.86	1360.61	1411.5	MRPL28
ENSG00000086544	0.234619	0.190893	0.546121	213.024	153.372	201.316	162.499	176.924	185.348	ITPKC
ENSG00000086548	-0.110408	0.61822	0.872808	179.502	191.427	298.064	281.539	224.523	284.2	CEACAM6
ENSG00000086589	-0.0723166	0.522341	0.825238	1942.08	2124.15	1905.66	1846.07	1797.08	1965.64	RBM22
ENSG00000086598	0.0349341	0.75947	0.930586	4795.73	4653.06	4506.15	4012.41	4303.66	4614.69	TMED2
ENSG00000086619	0.469248	0.00815063	0.104827	419.559	334.421	554.106	290.042	469.702	418.221	ERO1B
ENSG00000086666	-0.351417	0.00248531	0.0510908	953.74	1299.63	925.465	1156.39	956.468	1163.42	ZFAND6
ENSG00000086712	0.185033	0.242089	0.607384	402.258	340.187	371.359	332.556	317.925	287.052	TXLNG
ENSG00000086730	-0.304007	0.0488912	0.277036	4821.69	5764.72	3653	5435.22	4006.39	4208.83	LAT2
ENSG00000003989	0.856682	4.34601e-06	0.000817172	695.3	357.484	669.423	268.313	591.843	454.341	SLC7A2
ENSG00000086827	0.0179364	0.902657	0.977863	540.669	540.839	517.948	432.701	484.072	550.341	ZW10
ENSG00000086848	0.225617	0.401627	0.749211	54.0669	56.5056	61.5674	51.0172	68.255	50.3767	ALG9
ENSG00000086967	0.723548	0.30693	NA	5.40669	11.5318	25.4088	7.5581	8.08283	4.75252	MYBPC2
ENSG00000087008	-0.0436163	0.759006	0.930379	455.243	517.776	495.471	557.41	551.428	474.301	ACOX3
ENSG00000087053	0.178175	0.127462	0.453523	1655.53	1496.82	1686.75	1319.83	1605.79	1556.92	MTMR2
ENSG00000087074	-0.478129	0.0109363	0.12331	14576.4	20234.8	10675.6	17573.5	10630.7	12174	PPP1R15A
ENSG00000087076	-0.0965937	0.809898	0.94629	38.9282	53.0461	25.4088	37.7905	37.7199	19.0101	HSD17B14
ENSG00000087077	-0.0286991	0.787412	0.940632	1561.45	1665.18	1642.77	1659	1701.88	1681.44	TRIP6
ENSG00000087085	0.933212	0.11958	NA	7.56937	8.07223	18.5679	6.61334	21.5542	10.4555	ACHE
ENSG00000087086	0.0836001	0.604249	0.868418	83154.9	82985.9	81061.8	59431.2	87696	95313.6	FTL
ENSG00000087087	0.0111187	0.912926	0.980412	4501.61	4453.56	4154.33	4185.3	4413.22	4330.49	SRRT
ENSG00000087088	-0.0731355	0.550413	0.841828	1151.63	1323.84	1276.3	1319.83	1406.41	1391.54	BAX
ENSG00000087095	0.0657836	0.705341	0.910499	401.176	365.556	320.541	277.76	300.861	333.627	NLK
ENSG00000087111	-0.141959	0.248763	0.614136	1579.84	1858.92	1860.7	2102.1	1808.76	1831.62	PIGS
ENSG00000087116	0.0629779	0.608144	0.869472	1319.23	1381.5	1524.53	1479.5	1467.48	1267.02	ADAMTS2
ENSG00000087152	-0.219981	0.056555	0.299332	1932.35	2076.87	1822.59	2348.68	1783.61	2023.62	ATXN7L3
ENSG00000087157	0.162041	0.207513	0.567335	722.334	645.778	743.695	596.145	726.556	717.63	PGS1
ENSG00000087191	0.0877355	0.457256	0.784724	2294.6	2328.26	2459.76	1988.72	2359.29	2378.16	PSMC5
ENSG00000087206	0.0693318	0.597616	0.86666	615.281	562.749	559.97	557.41	537.059	511.371	UIMC1
ENSG00000087245	-0.19334	0.326551	0.692621	1081.34	1373.43	741.74	834.225	937.608	950.503	MMP2
ENSG00000087253	-0.217414	0.153861	0.495836	2196.2	2566.97	1875.36	2197.52	1660.57	1900.06	LPCAT2
ENSG00000087263	0.0390928	0.737742	0.92092	758.018	724.194	733.922	717.075	761.582	751.848	OGFOD1
ENSG00000087266	-0.278493	0.0366406	0.237395	1438.18	1785.11	1370.12	1938.65	1478.26	1476.13	SH3BP2
ENSG00000087269	0.0657988	0.567318	0.852125	2782.28	2689.2	2653.26	2317.5	2480.53	2556.85	NOP14
ENSG00000087274	-0.308679	0.00830583	0.106094	2699.02	3364.96	2675.74	3767.71	2926.88	3149.97	ADD1
ENSG00000087299	0.12095	0.547447	0.840821	137.33	128.002	134.862	141.714	134.714	104.555	L2HGDH
ENSG00000087301	0.0590756	0.75192	0.926395	257.358	194.887	250.179	214.461	211.95	279.448	TXNDC16
ENSG00000087302	-0.103444	0.425197	0.764274	1228.4	1351.52	1182.48	1136.55	1032.81	1211.89	RTRAF
ENSG00000239306	0.855309	3.22738e-07	0.000123101	1529.01	839.511	1860.7	826.667	1815.04	1209.99	RBM14
ENSG00000087365	-0.145965	0.149699	0.490064	5145.01	5937.7	5162.86	5812.18	5648.1	5906.43	SF3B2
ENSG00000087448	0.353489	0.0163648	0.154069	1102.96	824.52	1246.01	839.894	1193.56	1107.34	KLHL42
ENSG00000087460	-0.0575666	0.626698	0.875423	12340.2	14779.1	14763.5	14102.5	15220.9	15168.1	GNAS
ENSG00000087470	0.23484	0.0918039	0.385334	1450.07	1217.75	1471.75	1014.67	1272.6	1331.66	DNM1L
ENSG00000152484	0.849431	3.93398e-06	0.000761139	3867.95	2304.04	5003.57	1824.34	4191.4	3121.45	USP12
ENSG00000087502	0.0561017	0.683816	0.90259	1423.04	1319.23	1254.8	1070.42	1177.4	1318.35	ERGIC2
ENSG00000160117	0.848271	0.00021489	0.0111193	155.713	98.0199	231.611	100.145	228.115	143.526	ANKLE1
ENSG00000087589	-1.52301	0.0192669	NA	4.32535	16.1445	3.90904	21.7295	8.08283	9.50503	CASS4
ENSG00000087842	0.455185	0.0234508	0.188092	303.856	243.32	397.745	223.909	415.817	347.884	PIR
ENSG00000087884	-0.209255	0.232406	0.596487	158.957	201.806	167.111	211.627	188.599	182.497	AAMDC
ENSG00000080298	0.844415	0.000380144	0.0159589	249.789	118.777	171.02	84.0839	153.574	116.912	RFX3
ENSG00000087995	0.0840813	0.55634	0.845575	361.167	334.421	405.563	353.341	361.033	375.449	METTL2A
ENSG00000088002	-0.358149	0.39202	NA	16.2201	27.6762	27.3633	21.7295	17.0637	28.5151	SULT2B1
ENSG00000088035	0.332101	0.0455183	0.266582	316.832	247.933	284.383	210.682	252.364	219.566	ALG6
ENSG00000088038	-0.107841	0.354365	0.711576	1459.81	1759.75	1504.98	1650.5	1674.04	1591.14	CNOT3
ENSG00000088179	0.108146	0.626219	0.874937	92.9951	100.326	126.067	99.2001	96.0958	93.1493	PTPN4
ENSG00000088205	0.20301	0.10601	0.410211	3174.81	2761.85	3066.64	2561.25	2608.06	2364.85	DDX18
ENSG00000088247	-0.110879	0.258612	0.625787	8993.49	10169.9	9023.04	9961.57	9328.48	9399.53	KHSRP
ENSG00000088256	0.0538395	0.726443	0.91733	323.32	356.331	383.086	384.518	417.613	343.132	GNA11
ENSG00000088298	0.0565872	0.665196	0.893496	456.325	428.981	484.721	451.596	449.944	456.242	EDEM2
ENSG00000088305	-0.35477	0.101696	0.400604	80.019	133.768	104.567	119.985	116.752	133.07	DNMT3B
ENSG00000088325	-0.21776	0.134658	0.465239	1953.98	2226.78	2192.97	2877.75	2551.48	2685.17	TPX2
ENSG00000088340	0.339089	0.353098	0.71136	24.8708	35.7484	65.4764	37.7905	50.2931	38.0201	FER1L4
ENSG00000088356	0.236302	0.164703	0.513735	649.884	536.226	636.196	408.137	507.422	577.906	PDRG1
ENSG00000088367	-0.40962	0.102305	0.401724	115.703	139.534	72.3172	111.482	76.3378	99.8028	EPB41L1
ENSG00000088387	0.166051	0.590217	0.862764	42.1722	35.7484	53.7493	46.2934	41.3122	39.9211	DOCK9
ENSG00000088448	0.0801058	0.561772	0.848762	751.53	734.572	659.65	687.787	711.289	586.46	ANKRD10
ENSG00000088451	0.457453	0.0121107	0.129653	248.708	167.21	257.019	153.996	203.867	194.853	TGDS
ENSG00000088543	-0.466316	0.246116	0.612456	21.6268	32.2889	25.4088	22.6743	16.1657	32.3171	C3orf18
ENSG00000088682	0.11986	0.355091	0.71244	486.602	424.368	495.471	457.265	476.887	460.044	COQ9
ENSG00000088727	-0.418605	0.0223304	0.18334	176.258	181.048	155.384	226.743	149.981	233.824	KIF9
ENSG00000088766	0.0988144	0.539414	0.836488	318.995	283.681	370.382	293.821	294.574	340.28	CRLS1
ENSG00000088808	-0.0893657	0.747485	0.92408	52.9856	57.6588	44.954	51.9619	61.9683	60.8322	PPP1R13B
ENSG00000088812	-0.543984	0.0064772	0.0903559	1277.06	1564.86	832.625	1689.24	865.761	1082.62	ATRN
ENSG00000134762	0.839081	0.000829063	0.026956	318.995	208.725	614.696	237.135	524.486	368.795	DSC3
ENSG00000088827	0.305714	0.53609	0.835782	207.617	163.751	288.292	286.263	509.218	363.092	SIGLEC1
ENSG00000088832	-0.01683	0.866953	0.963762	2453.56	2518.53	2541.85	2471.5	2434.73	2527.39	FKBP1A
ENSG00000088833	-0.147107	0.252387	0.617665	458.487	548.911	511.107	550.796	511.014	540.836	NSFL1C
ENSG00000088836	0.487541	0.0453506	0.26624	81.1004	64.5778	100.658	62.3543	79.9302	59.8817	SLC4A11
ENSG00000088854	-0.574582	0.00353722	0.0631308	808.841	974.433	510.13	1063.8	544.244	734.739	C20orf194
ENSG00000088876	0.627492	0.0862762	0.372352	57.3109	46.127	95.7715	25.5086	80.8283	79.8423	ZNF343
ENSG00000088882	0.060857	0.798078	0.943667	80.019	65.731	81.1126	75.581	77.2359	86.4958	CPXM1
ENSG00000088888	-0.0183911	0.873009	0.966311	1100.8	1090.9	1036.87	1157.33	1159.44	1091.18	MAVS
ENSG00000088899	-0.604697	0.147649	0.487296	34.6028	61.1183	14.6589	28.3429	42.2103	50.3767	LZTS3
ENSG00000088930	-0.0946479	0.379263	0.730258	5155.82	5439.53	5224.43	5319.96	4558.71	5191.65	XRN2
ENSG00000088970	-0.162072	0.291915	0.660174	253.033	282.528	253.11	301.379	245.179	256.636	KIZ
ENSG00000088986	0.427178	0.0129322	0.134237	4338.33	3476.82	4149.45	2239.09	4161.76	3692.7	DYNLL1
ENSG00000088992	-0.325147	0.194453	0.550806	70.287	96.8667	65.4764	66.1334	68.255	93.1493	TESC
ENSG00000089006	0.152527	0.16773	0.518571	1453.32	1346.91	1515.73	1264.09	1496.22	1406.74	SNX5
ENSG00000089009	-0.039946	0.736212	0.920265	18941.8	20480.4	18589.4	17127.6	16504.2	17945.5	RPL6
ENSG00000089022	0.0306254	0.794788	0.943086	754.774	789.925	786.694	754.865	823.55	771.809	MAPKAPK5
ENSG00000089041	0.565166	0.0227285	0.185299	101.646	68.0373	76.2263	64.2438	115.854	66.5352	P2RX7
ENSG00000089048	0.233532	0.196695	0.553631	432.535	354.025	367.45	254.141	370.912	387.805	ESF1
ENSG00000089050	0.10911	0.72976	0.918026	37.8468	34.5953	39.0904	44.4038	50.2931	38.9706	RBBP9
ENSG00000089053	-0.0972949	0.415435	0.758798	2623.33	2656.92	2672.81	3120.55	2506.57	2568.26	ANAPC5
ENSG00000089057	-0.0142402	0.907689	0.979283	960.228	922.54	940.124	1016.56	882.824	870.661	SLC23A2
ENSG00000089060	0.124523	0.352224	0.71136	1160.28	1104.74	1038.83	867.292	1056.16	1015.14	SLC8B1
ENSG00000089063	-0.0087251	0.943084	0.988106	1094.31	1139.34	1083.78	967.437	1029.21	1120.64	TMEM230
ENSG00000089091	0.0166948	0.900495	0.977128	2817.97	2555.44	3302.16	3195.19	2988.85	3251.67	DZANK1
ENSG00000089094	-0.386593	0.0047512	0.0753308	1535.5	1916.58	1524.53	2342.07	1517.78	1725.16	KDM2B
ENSG00000089123	0.124174	0.567191	0.852125	98.4018	113.011	117.271	86.9181	107.771	97.9018	TASP1
ENSG00000089127	0.0204328	0.936733	0.987163	366.574	432.441	662.582	439.315	662.792	796.522	OAS1
ENSG00000168944	0.833443	1.68964e-05	0.0021081	1823.14	1112.81	2010.22	697.235	1662.37	1274.62	CEP120
ENSG00000089157	0.0568064	0.569072	0.8529	45209.7	42457.6	43331.7	39967.2	41031.1	42144.4	RPLP0
ENSG00000089159	-0.266482	0.0615148	0.311741	720.171	853.35	684.082	997.669	757.99	749.947	PXN
ENSG00000089177	0.294777	0.152627	0.494197	128.679	108.398	119.226	109.592	127.529	88.3968	KIF16B
ENSG00000089195	-0.0408222	0.769453	0.934006	521.205	548.911	464.198	458.21	469.702	490.46	TRMT6
ENSG00000089220	-0.0504861	0.653101	0.88751	2371.37	2527.76	2621.99	2392.14	2355.7	2690.87	PEBP1
ENSG00000089234	-0.032367	0.791149	0.942247	720.171	733.419	748.581	702.903	716.677	798.423	BRAP
ENSG00000089248	-0.108312	0.415407	0.758798	2486	2750.32	2956.21	3077.09	3093.03	3373.34	ERP29
ENSG00000089250	0.0756743	0.89904	NA	5.40669	16.1445	20.5225	11.3371	12.5733	9.50503	NOS1
ENSG00000089280	-0.164532	0.102861	0.402458	15458.8	18223.6	15190.5	16186.6	15521.7	17340	FUS
ENSG00000089289	-0.23993	0.0496457	0.279148	718.009	878.719	665.514	799.269	700.512	784.165	IGBP1
ENSG00000089327	-0.0992999	0.489454	0.806617	1115.94	1541.79	1232.32	1176.23	1344.44	1241.36	FXYD5
ENSG00000089335	0.320127	0.0647346	0.320314	311.425	217.95	312.723	222.964	306.249	303.211	ZNF302
ENSG00000211445	0.827632	0.000113131	0.00766648	280.067	146.453	197.407	102.034	239.791	155.883	GPX3
ENSG00000089486	0.0467403	0.719945	0.914914	557.97	611.183	605.901	533.791	575.677	540.836	CDIP1
ENSG00000089505	0.784984	0.118441	NA	33.5215	18.4508	11.7271	18.8952	36.8218	10.4555	CMTM1
ENSG00000089558	0.3206	0.380881	0.731728	27.0335	34.5953	43.9767	25.5086	34.1275	24.7131	KCNH4
ENSG00000089597	0.0263307	0.841457	0.956119	8467.96	8418.18	10099	9846.31	10539.1	10314.9	GANAB
ENSG00000136059	0.8213	6.28306e-05	0.0051777	1923.7	1048.24	1843.11	714.24	1929.1	1460.92	VILL
ENSG00000089682	0.000568865	0.99794	0.999553	158.957	115.318	151.475	136.991	133.816	190.101	RBM41
ENSG00000089685	-0.261747	0.0539899	0.291719	1565.78	1834.7	1814.77	2219.25	1909.34	2287.86	BIRC5
ENSG00000089693	-0.0469655	0.686339	0.903256	1361.4	1602.91	1475.66	1429.43	1542.02	1494.19	MLF2
ENSG00000089723	0.0173535	0.959878	0.991252	28.1148	35.7484	31.2723	31.1772	39.516	31.3666	OTUB2
ENSG00000089737	0.0152205	0.888042	0.972531	3365.12	3106.65	3160.46	3022.29	3075.07	3369.53	DDX24
ENSG00000089775	0.22085	0.325938	0.692501	115.703	91.1008	105.544	85.9734	85.3187	85.5453	ZBTB25
ENSG00000089818	0.229362	0.124965	0.447862	636.908	515.469	518.925	461.989	503.83	438.182	NECAP1
ENSG00000089820	-0.0525144	0.622031	0.873664	4316.7	4775.3	4293.1	4694.52	4686.24	4320.99	ARHGAP4
ENSG00000089847	0.247489	0.501334	0.813319	31.3588	48.4334	41.0449	22.6743	46.7008	30.4161	ANKRD24
ENSG00000089876	-0.186913	0.350145	0.709849	109.215	137.228	117.271	150.217	135.612	125.466	DHX32
ENSG00000089902	-0.256912	0.0627216	0.314744	1905.32	2109.16	1772.75	2386.47	1603.09	1813.56	RCOR1
ENSG00000089916	-0.0190177	0.864665	0.962924	2695.78	2447.04	2534.04	2552.75	2350.31	2678.52	GPATCH2L
ENSG00000090006	-0.377319	0.0152145	0.148367	442.267	672.301	534.561	754.865	572.085	586.46	LTBP4
ENSG00000090013	-0.117804	0.520406	0.824468	366.574	437.053	286.337	295.711	323.313	327.924	BLVRB
ENSG00000090020	0.00230131	0.988007	0.997349	673.674	774.934	608.833	580.084	648.422	575.054	SLC9A1
ENSG00000090054	0.0121132	0.930619	0.985387	1669.59	1824.32	1595.87	1364.24	1465.69	1504.65	SPTLC1
ENSG00000090060	0.0828663	0.467115	0.792777	7548.82	6894.83	6948.32	6333.69	6300.11	6407.34	PAPOLA
ENSG00000090061	-0.160509	0.178376	0.533174	798.028	998.65	848.262	899.414	862.168	907.731	CCNK
ENSG00000090097	-0.0541133	0.711706	0.913321	380.631	467.036	417.29	431.756	428.39	376.399	PCBP4
ENSG00000138821	0.820599	5.68184e-05	0.00480079	4501.61	2408.98	4484.65	1619.32	3921.97	3280.19	SLC39A8
ENSG00000198886	0.816959	0.000108637	0.00752421	74959.4	29002.4	52044	28971.1	65434.1	51259.7	MT-ND4
ENSG00000090263	0.246698	0.0860681	0.371727	475.789	404.764	445.631	337.28	426.594	394.459	MRPS33
ENSG00000090266	0.229053	0.120266	0.439199	701.788	629.634	644.992	480.884	693.327	631.134	NDUFB2
ENSG00000090273	0.0713728	0.513394	0.820364	2920.69	3002.87	3002.14	2590.54	2911.61	2816.34	NUDC
ENSG00000090316	0.0169309	0.883519	0.970924	1563.61	1559.09	1393.57	1447.38	1489.04	1388.69	MAEA
ENSG00000090339	0.0894343	0.597153	0.86666	10469.5	10355.5	8377.07	6556.65	9239.57	9486.97	ICAM1
ENSG00000090372	-0.226391	0.0447213	0.263502	2201.6	2543.9	2062.02	2634	2103.33	2270.75	STRN4
ENSG00000090376	0.110119	0.307313	0.674967	2650.36	2487.4	2469.54	2300.5	2474.24	2248.89	IRAK3
ENSG00000090382	0.0285239	0.813484	0.94736	5489.95	5258.48	4612.67	4469.67	4893.7	4974.93	LYZ
ENSG00000090432	0.0405027	0.774821	0.935053	656.372	657.31	604.924	526.233	560.409	588.361	MUL1
ENSG00000090447	-0.0447486	0.857239	0.960796	67.043	65.731	65.4764	79.36	70.0512	63.6837	TFAP4
ENSG00000090470	0.0560043	0.66508	0.893496	765.587	744.951	715.354	630.157	714.881	737.59	PDCD7
ENSG00000090487	0.143344	0.381132	0.731891	1780.96	1590.23	1393.57	1157.33	1297.74	1302.19	SPG21
ENSG00000090520	0.144812	0.287261	0.65622	2124.83	2049.19	2011.2	1539.96	1872.52	1846.83	DNAJB11
ENSG00000090530	-0.351522	0.366809	0.721938	24.8708	55.3524	27.3633	23.6191	37.7199	37.0696	P3H2
ENSG00000090554	-0.31179	0.546722	NA	20.5454	16.1445	19.5452	20.7848	6.28664	19.9606	FLT3LG
ENSG00000090565	-0.0544682	0.689457	0.90416	449.837	462.423	467.13	532.846	507.422	483.806	RAB11FIP3
ENSG00000090581	-0.0158558	0.903058	0.977863	684.487	806.069	775.944	735.97	832.531	778.462	GNPTG
ENSG00000090612	0.304845	0.032769	0.223768	618.525	435.9	600.038	470.492	601.722	565.549	ZNF268
ENSG00000090615	0.0571481	0.59531	0.86554	1499.82	1389.58	1445.37	1420.92	1523.16	1483.74	GOLGA3
ENSG00000090621	0.10831	0.375392	0.728838	22399.9	22180.2	21229	17645.3	19945.7	19152.6	PABPC4
ENSG00000090659	-0.160993	0.720811	0.915107	879.128	966.361	382.109	504.503	552.327	556.995	CD209
ENSG00000090661	-0.0707634	0.739391	0.921436	142.737	138.381	140.725	164.389	114.058	114.06	CERS4
ENSG00000090674	-0.192791	0.202097	0.560973	313.588	433.594	395.79	385.463	379.893	427.726	MCOLN1
ENSG00000090686	0.0309223	0.797586	0.943366	1579.84	1386.12	1424.84	1594.76	1447.72	1375.38	USP48
ENSG00000090776	-0.460592	0.0586841	0.304719	121.11	163.751	130.953	257.92	154.472	137.823	EFNB1
ENSG00000090857	-0.15254	0.301428	0.668617	608.793	645.778	653.787	845.562	733.741	727.135	PDPR
ENSG00000090861	0.0162536	0.895947	0.975524	4965.5	4691.12	4696.71	5001.57	5722.64	5519.57	AARS
ENSG00000090863	0.267305	0.017205	0.158812	3016.93	2374.39	2905.39	2381.75	3088.54	2729.85	GLG1
ENSG00000090889	-0.132918	0.370799	0.724942	959.147	893.711	963.578	1123.32	1065.14	1257.52	KIF4A
ENSG00000090905	0.107289	0.432915	0.770075	682.324	544.299	687.014	663.223	678.059	691.016	TNRC6A
ENSG00000090924	0.0806769	0.537785	0.836355	1826.38	1699.78	1619.32	1862.13	2082.68	1666.23	PLEKHG2
ENSG00000090971	-0.301662	0.120228	0.439199	139.493	144.147	137.794	162.499	132.918	197.705	NAT14
ENSG00000090975	0.00669289	0.970674	0.994055	218.43	217.95	239.429	279.65	237.994	194.853	PITPNM2
ENSG00000090989	-0.137833	0.248433	0.614097	687.731	733.419	689.946	744.473	635.849	736.64	EXOC1
ENSG00000091009	0.123667	0.37905	0.730253	541.75	453.198	512.084	432.701	455.333	498.064	RBM27
ENSG00000091039	-0.148565	0.283748	0.652659	2610.35	2545.06	2212.52	2595.26	1910.24	2321.13	OSBPL8
ENSG00000091073	0.134321	0.458617	0.78592	222.756	223.716	287.314	218.24	285.593	283.25	DTX2
ENSG00000091106	-0.418709	0.366077	NA	21.6268	31.1357	17.5907	17.9505	11.6752	19.0101	NLRC4
ENSG00000091127	0.441998	0.00514997	0.0791163	313.588	222.563	333.246	257.92	297.268	213.863	PUS7
ENSG00000091129	0.138746	0.675279	0.899608	68.1243	48.4334	72.3172	45.3486	82.6245	108.357	NRCAM
ENSG00000091136	0.0662522	0.829351	0.952418	60.5549	51.8929	106.521	104.869	105.077	102.654	LAMB1
ENSG00000091140	-0.0119914	0.91857	0.981263	2292.44	2520.84	2775.42	2454.49	2423.95	2579.67	DLD
ENSG00000091157	0.352352	0.0363949	0.236895	328.727	222.563	336.177	257.92	258.65	241.428	WDR7
ENSG00000091164	0.0496272	0.687224	0.903618	1212.18	1186.62	1175.64	1049.63	1248.35	1277.48	TXNL1
ENSG00000091262	-0.20202	0.347813	0.707928	134.086	147.606	176.884	231.467	185.007	191.051	ABCC6
ENSG00000091317	-0.189144	0.193759	0.549423	3954.45	4188.33	3198.57	3568.37	2836.17	3630.92	CMTM6
ENSG00000091409	-0.509113	0.256536	0.62308	599.061	829.133	294.155	498.835	322.415	402.063	ITGA6
ENSG00000091428	-0.504814	0.307079	NA	16.2201	10.3786	13.6816	29.2876	15.2676	23.7626	RAPGEF4
ENSG00000091436	0.0925097	0.51363	0.820505	968.879	769.168	1007.55	1043.02	924.137	905.83	MAP3K20
ENSG00000091483	0.101187	0.382433	0.73312	1336.53	1248.89	1445.37	1230.08	1242.96	1272.72	FH
ENSG00000091490	-0.0638838	0.727005	0.917548	2568.18	2585.42	3645.18	4054.92	3553.75	3568.19	SEL1L3
ENSG00000091513	0.301292	0.448204	NA	27.0335	24.2167	28.3405	17.9505	23.3504	21.8616	TF
ENSG00000091527	0.0687162	0.582311	0.860091	5194.75	4768.38	4396.69	4045.47	4301.86	4433.15	CDV3
ENSG00000091536	0.0334351	0.943495	NA	15.1387	17.2976	16.6134	21.7295	20.6561	12.3565	MYO15A
ENSG00000091542	0.155972	0.276159	0.643406	522.286	471.649	587.333	465.768	574.779	574.104	ALKBH5
ENSG00000091592	-0.0408435	0.849445	0.958999	123.273	124.543	106.521	94.4762	107.771	128.318	NLRP1
ENSG00000091640	-0.0759202	0.598919	0.866813	426.047	476.261	394.813	388.297	390.67	413.469	SPAG7
ENSG00000091651	-0.0635968	0.667935	0.895072	659.616	668.842	781.808	675.505	589.148	776.561	ORC6
ENSG00000091732	0.0831551	0.562267	0.849027	407.664	380.548	432.926	364.678	419.409	443.885	ZC3HC1
ENSG00000091947	-0.147349	0.405075	0.752112	378.468	366.71	463.221	559.299	442.759	495.212	TMEM101
ENSG00000092010	-0.0744384	0.508644	0.817364	2282.7	2584.27	2358.13	2206.02	2256.01	2473.21	PSME1
ENSG00000092020	-0.116467	0.35787	0.714777	1286.79	1433.4	1183.46	1191.35	1120.82	1268.92	PPP2R3C
ENSG00000092036	-0.0562515	0.648333	0.884904	613.119	588.119	593.197	646.217	590.046	632.085	HAUS4
ENSG00000092094	0.0402123	0.744908	0.923415	751.53	753.023	710.468	656.61	727.454	720.481	OSGEP
ENSG00000092098	-0.221362	0.110268	0.4188	486.602	582.353	507.198	668.892	556.817	556.995	RNF31
ENSG00000092108	-0.0516522	0.724838	0.916951	674.755	735.726	621.537	551.741	606.212	685.313	SCFD1
ENSG00000092140	0.0102269	0.937157	0.98737	466.057	455.504	472.994	444.983	453.536	481.905	G2E3
ENSG00000092148	-0.119454	0.433969	0.770735	2598.46	2379	2211.54	3137.56	2291.03	2195.66	HECTD1
ENSG00000092199	0.26267	0.028641	0.207578	20458.9	16722.2	19214.9	14136.5	18160.3	17348.6	HNRNPC
ENSG00000092200	-1.26434	0.0411181	NA	4.32535	19.604	8.79534	17.9505	6.28664	9.50503	RPGRIP1
ENSG00000092201	-0.0532712	0.62016	0.873446	6199.31	6153.34	6574.03	7012.97	6066.61	6380.73	SUPT16H
ENSG00000092203	-0.14831	0.216192	0.578641	1589.57	1843.93	1474.69	1691.12	1504.3	1529.36	TOX4
ENSG00000092208	0.139813	0.477929	0.800546	153.55	131.462	138.771	114.316	147.287	153.031	GEMIN2
ENSG00000092295	0.0325305	0.938169	NA	28.1148	24.2167	22.477	25.5086	17.9618	17.1091	TGM1
ENSG00000092330	-0.0719105	0.607133	0.869286	806.678	847.584	687.014	731.246	673.569	699.57	TINF2
ENSG00000228477	0.814642	5.63777e-09	7.04103e-06	475.789	266.383	506.221	272.092	497.543	302.26	AL663070.1
ENSG00000092439	0.200042	0.0954845	0.392452	1576.59	1314.62	1573.39	1373.68	1364.2	1240.41	TRPM7
ENSG00000092445	-0.0303483	0.875439	0.967716	155.713	134.921	152.453	188.952	159.86	153.031	TYRO3
ENSG00000092470	-0.309499	0.0423869	0.256163	583.923	622.715	501.334	749.197	484.97	572.203	WDR76
ENSG00000092531	0.0541942	0.635105	0.879613	1075.93	1057.46	1191.28	1120.49	1105.55	1070.27	SNAP23
ENSG00000092607	-0.432055	0.0504911	0.281443	236.813	344.799	165.157	261.699	194.886	199.606	TBX15
ENSG00000092621	0.277994	0.0528822	0.288411	5254.22	4221.77	4562.83	3535.3	5498.12	4874.18	PHGDH
ENSG00000092758	-0.371193	0.207239	0.567327	38.9282	46.127	48.863	71.8019	52.0893	62.7332	COL9A3
ENSG00000092820	-0.307282	0.0145676	0.145425	3997.71	4969.03	4539.37	6118.28	4635.95	5212.56	EZR
ENSG00000092841	0.0422786	0.741705	0.92258	18197.8	18048.3	15819.9	14065.6	16565.3	17009.3	MYL6
ENSG00000092847	-0.17075	0.263578	0.629701	593.655	672.301	561.924	778.484	628.664	557.945	AGO1
ENSG00000092853	-0.1497	0.226413	0.589318	1292.2	1359.59	1452.21	1519.18	1327.38	1636.77	CLSPN
ENSG00000092871	-0.103353	0.45817	0.785384	660.698	718.428	596.129	591.421	652.015	741.393	RFFL
ENSG00000092929	-0.0159804	0.917883	0.980911	670.43	663.076	819.921	892.8	842.41	802.225	UNC13D
ENSG00000092931	-0.37993	0.023226	0.187465	400.095	528.154	306.86	460.099	352.95	391.607	MFSD11
ENSG00000092964	0.0505933	0.719094	0.914845	2787.69	2751.48	2365.95	2067.14	2587.4	2656.66	DPYSL2
ENSG00000092969	-0.28375	0.606181	NA	7.56937	18.4508	15.6362	16.061	12.5733	9.50503	TGFB2
ENSG00000092978	0.0564729	0.714064	0.913837	527.693	458.964	406.54	405.303	414.918	432.479	GPATCH2
ENSG00000093000	-0.0286066	0.810773	0.946518	2253.51	2154.13	2388.42	2205.08	2017.11	2431.39	NUP50
ENSG00000093009	-0.205228	0.154259	0.496471	861.827	997.496	1018.3	1290.55	1006.76	1039.85	CDC45
ENSG00000093010	-0.00226422	0.984832	0.997086	4948.2	5386.48	5926.1	5843.36	6039.67	5711.57	COMT
ENSG00000093072	-0.102798	0.549648	0.841781	206.536	244.473	241.383	275.871	233.504	211.962	ADA2
ENSG00000093144	0.0118336	0.92122	0.982156	1598.22	1519.88	1540.16	1396.36	1368.69	1553.12	ECHDC1
ENSG00000093167	-0.0946411	0.438419	0.772762	876.965	987.118	913.738	857.844	859.474	985.672	LRRFIP2
ENSG00000145423	0.810607	0.0019441	0.0435465	141.655	85.335	108.476	46.2934	123.039	81.7433	SFRP2
ENSG00000093217	0.484469	0.00979152	0.11695	173.014	111.858	195.452	138.88	177.822	138.773	XYLB
ENSG00000094631	-0.171183	0.174433	0.527981	844.525	994.037	912.761	1099.7	1014.84	1028.44	HDAC6
ENSG00000094804	-0.261525	0.0538326	0.291548	892.104	1012.49	947.942	1231.03	846.901	976.167	CDC6
ENSG00000094841	-0.0125306	0.934369	0.986549	284.392	307.898	279.496	261.699	270.326	272.794	UPRT
ENSG00000094880	-0.155223	0.170905	0.523298	910.487	995.19	927.42	1079.86	934.914	1012.29	CDC23
ENSG00000094914	0.062245	0.643032	0.882497	625.013	687.292	763.24	673.616	770.563	708.125	AAAS
ENSG00000094916	-0.0171626	0.898338	0.976455	5020.65	4544.66	5402.29	5953.89	5714.56	5830.39	CBX5
ENSG00000094975	0.0496995	0.707949	0.911566	703.951	697.671	773.013	718.964	645.728	633.986	SUCO
ENSG00000095002	-0.0374847	0.775825	0.935381	1126.75	1052.85	1147.3	1147.89	920.544	1075.97	MSH2
ENSG00000095015	0.0107749	0.956394	0.99088	487.684	411.683	621.537	724.633	598.129	556.995	MAP3K1
ENSG00000095059	-0.120485	0.310135	0.677849	1051.06	1245.43	1177.6	1272.59	1246.55	1261.32	DHPS
ENSG00000095066	0.132713	0.431926	0.769679	202.21	223.716	227.702	199.345	241.587	191.051	HOOK2
ENSG00000095139	-0.000590339	0.995671	0.999366	7374.73	7071.27	6613.12	6608.61	6370.17	6685.84	ARCN1
ENSG00000095209	0.29658	0.0446432	0.263455	682.324	523.541	724.15	516.785	541.549	544.638	TMEM38B
ENSG00000095261	0.0140474	0.946332	0.988562	180.583	139.534	187.634	222.964	161.657	160.635	PSMD5
ENSG00000095303	-0.276884	0.0283742	0.207119	806.678	909.855	676.264	924.922	737.333	854.502	PTGS1
ENSG00000095319	0.282469	0.00649862	0.0905601	2447.07	2014.6	2623.94	2119.1	2486.82	2079.7	NUP188
ENSG00000273136	0.808594	1.40596e-07	6.25651e-05	477.951	224.869	413.381	246.583	403.243	266.141	NBPF26
ENSG00000095370	-0.265922	0.473441	0.797491	27.0335	29.9826	42.9994	52.9067	26.9428	33.2676	SH2D3C
ENSG00000095380	0.000222289	0.998583	0.999829	916.975	929.459	870.739	799.269	814.569	873.512	NANS
ENSG00000184058	0.808285	0.000684577	0.0235544	118.947	62.2715	145.612	99.2001	139.204	68.4362	TBX1
ENSG00000095397	-0.309668	0.353046	0.71136	46.4975	36.9016	29.3178	42.5143	35.0256	57.0302	WHRN
ENSG00000095485	-0.213213	0.0958607	0.393162	498.497	620.408	528.698	579.139	555.021	635.887	CWF19L1
ENSG00000095539	-0.0124059	0.983118	NA	6.48803	12.6849	18.5679	11.3371	9.87901	11.406	SEMA4G
ENSG00000095564	0.270115	0.0285242	0.207204	2298.92	1710.16	2008.27	1646.72	1840.19	1739.42	BTAF1
ENSG00000095574	-0.0615254	0.684787	0.90259	274.66	297.519	319.564	316.495	274.816	292.755	IKZF5
ENSG00000095585	-0.64766	0.168471	NA	19.4641	19.604	11.7271	24.5638	10.7771	20.9111	BLNK
ENSG00000095637	-0.489107	0.298014	NA	10.8134	19.604	14.6589	24.5638	17.9618	17.1091	SORBS1
ENSG00000095739	-0.571468	0.0996773	0.398233	30.2775	49.5865	30.2951	61.4096	35.0256	31.3666	BAMBI
ENSG00000095787	-0.130676	0.207933	0.567374	3670.06	3802.02	3340.27	3795.11	3320.25	3711.72	WAC
ENSG00000095794	-0.0567794	0.760203	0.930903	227.081	253.699	195.452	190.842	251.466	257.586	CREM
ENSG00000095906	-0.0213751	0.850746	0.958999	849.932	906.396	873.67	860.679	883.722	880.166	NUBP2
ENSG00000095932	-0.0542482	0.939175	NA	6.48803	16.1445	9.7726	1.88952	14.3695	14.2575	SMIM24
ENSG00000197461	0.805792	0.000540359	0.0200383	901.836	571.975	1542.12	615.04	1419.88	1022.74	PDGFA
ENSG00000095970	0.344879	0.0201615	0.172757	803.434	641.165	773.99	566.857	916.054	755.65	TREM2
ENSG00000096060	0.21361	0.195899	0.552674	1248.95	1092.06	1538.21	1067.58	1499.81	1536.96	FKBP5
ENSG00000156531	0.804595	1.44631e-06	0.000364307	1268.41	783.006	1875.36	838.004	1425.27	994.226	PHF6
ENSG00000096070	0.0306577	0.813212	0.947163	2292.44	2052.65	1815.75	1838.51	2033.28	2120.57	BRPF3
ENSG00000096080	-0.0766797	0.539929	0.836899	625.013	721.888	670.4	697.235	728.353	716.679	MRPS18A
ENSG00000096092	0.0345079	0.823454	0.950809	262.765	290.6	316.632	278.705	315.23	305.112	TMEM14A
ENSG00000096093	-0.0335442	0.83559	0.953444	221.674	202.959	212.065	237.135	217.338	225.269	EFHC1
ENSG00000096384	0.226652	0.0408785	0.251576	52948.8	46592.9	54396.2	40583.2	48377.5	45907.4	HSP90AB1
ENSG00000096401	-0.0605554	0.614076	0.871978	2621.16	2551.98	2368.88	2507.4	2131.17	2365.8	CDC5L
ENSG00000096433	-0.00523169	0.975848	0.994508	422.803	354.025	439.767	525.288	396.059	382.102	ITPR3
ENSG00000096654	0.243358	0.279963	0.648225	113.541	98.0199	91.8624	82.1943	99.6882	77.9413	ZNF184
ENSG00000096717	-0.0504658	0.729956	0.918026	796.946	746.104	644.014	718.964	606.212	653.946	SIRT1
ENSG00000096746	0.352509	0.00287316	0.0559136	3441.9	2776.85	3507.39	2459.22	3613.92	3037.81	HNRNPH3
ENSG00000096872	-0.304841	0.0971099	0.395346	160.038	184.508	166.134	206.903	133.816	175.843	IFT74
ENSG00000096968	-0.148096	0.328284	0.693194	825.061	857.962	755.422	936.26	669.977	698.62	JAK2
ENSG00000096996	-0.280085	0.267864	0.633362	89.7511	88.7945	114.339	168.168	118.548	134.021	IL12RB1
ENSG00000097007	-0.115339	0.344108	0.705075	1366.81	1435.7	1388.69	1702.46	1483.65	1453.32	ABL1
ENSG00000097021	-0.0244179	0.859936	0.961519	610.956	680.373	734.899	729.357	778.646	751.848	ACOT7
ENSG00000097033	-0.121993	0.2911	0.65987	1509.55	1575.24	1418.98	1523.9	1293.25	1494.19	SH3GLB1
ENSG00000097046	-0.132322	0.331751	0.696042	721.253	744.951	841.421	871.071	749.009	916.285	CDC7
ENSG00000097096	-0.0345906	0.944486	NA	17.3014	8.07223	18.5679	29.2876	21.5542	20.9111	SYDE2
ENSG00000099194	-0.292471	0.0365753	0.237393	7410.41	8488.52	6761.66	10488.8	8955.77	9348.2	SCD
ENSG00000099203	-0.342387	0.0681575	0.330099	161.119	192.58	164.18	257.92	183.211	193.903	TMED1
ENSG00000099219	0.227794	0.0798073	0.358007	1651.2	1281.18	1535.28	1568.31	1606.69	1242.31	ERMP1
ENSG00000099246	0.0730412	0.543105	0.837919	1219.75	1142.8	1203.01	1047.74	1202.55	1255.61	RAB18
ENSG00000099250	-0.355719	0.0675843	0.328091	656.372	747.257	368.427	647.162	581.964	661.55	NRP1
ENSG00000099251	0.763469	0.0376988	0.240114	32.4401	20.7572	38.1131	18.8952	38.618	24.7131	HSD17B7P2
ENSG00000099256	-0.203503	0.555794	0.845575	27.0335	40.3611	54.7266	53.8515	59.2741	68.4362	PRTFDC1
ENSG00000099282	-0.648594	0.0154824	0.14967	185.99	270.996	90.8852	192.732	122.141	161.586	TSPAN15
ENSG00000099284	0.0495784	0.782692	0.938387	215.186	235.248	232.588	256.031	250.568	184.398	H2AFY2
ENSG00000099290	0.0937062	0.428737	0.766529	931.032	883.332	1024.17	976.884	1013.95	921.988	WASHC2A
ENSG00000099308	-0.266432	0.228438	0.59205	156.794	214.491	199.361	300.434	220.033	178.695	MAST3
ENSG00000099326	0.0897962	0.6558	0.888555	188.153	179.895	218.906	209.737	276.612	252.834	MZF1
ENSG00000099330	-0.191144	0.307225	0.674967	141.655	177.589	148.544	190.842	162.555	149.229	OCEL1
ENSG00000099331	-0.0868672	0.428941	0.766529	3712.23	3958.85	3350.05	3942.49	3791.74	3627.12	MYO9B
ENSG00000099337	-0.330941	0.0437844	0.261064	221.674	294.06	202.293	291.932	263.141	279.448	KCNK6
ENSG00000099338	0.312872	0.456917	0.784656	19.4641	24.2167	42.0222	17.9505	26.0447	28.5151	CATSPERG
ENSG00000099341	0.0505777	0.650807	0.886489	2775.8	2922.15	2823.3	2471.5	2767.92	2687.07	PSMD8
ENSG00000099364	-0.0902699	0.463828	0.790364	987.262	995.19	1044.69	1197.96	1039.09	1075.02	FBXL19
ENSG00000099365	-0.866787	0.111409	NA	5.40669	16.1445	8.79534	23.6191	19.758	22.8121	STX1B
ENSG00000099377	-0.172521	0.643656	0.882507	22.7081	34.5953	23.4542	30.2324	37.7199	30.4161	HSD3B7
ENSG00000099381	-0.1102	0.460423	0.787224	976.448	989.424	1037.85	1346.29	1077.71	1000.88	SETD1A
ENSG00000099385	0.0602488	0.672372	0.897526	437.942	413.99	469.085	496.945	473.294	412.518	BCL7C
ENSG00000099399	0.34374	0.137235	0.469887	162.201	148.76	268.746	202.179	284.695	212.913	MAGEB2
ENSG00000173531	0.800918	0.000178846	0.0098255	169.77	80.7223	147.566	78.4153	149.981	108.357	MST1
ENSG00000099624	0.0965588	0.400638	0.748688	1315.99	1335.38	1489.34	1317.94	1357.92	1241.36	ATP5F1D
ENSG00000099625	-0.206475	0.631935	NA	14.0574	19.604	25.4088	32.1219	24.2485	21.8616	CBARP
ENSG00000099725	-0.0920799	0.80588	0.945722	18.3827	40.3611	43.9767	40.6248	50.2931	39.9211	PRKY
ENSG00000099783	0.0228469	0.828331	0.952182	11706.6	12312.4	12142.5	10828.9	11226.1	11384.2	HNRNPM
ENSG00000099785	-0.192387	0.249433	0.614874	353.598	445.126	307.837	329.722	311.638	338.379	2002-03-01
ENSG00000099795	-0.00598123	0.961857	0.991302	969.96	1027.48	913.738	874.85	892.703	886.819	NDUFB7
ENSG00000099797	-0.0207479	0.886191	0.971906	2491.4	3107.81	3495.66	3345.4	3346.29	3016.9	TECR
ENSG00000099800	0.145311	0.227769	0.591004	1351.67	1391.88	1474.69	1167.73	1405.51	1268.92	TIMM13
ENSG00000099804	-0.197521	0.140073	0.474213	511.473	604.264	561.924	676.45	612.499	652.996	CDC34
ENSG00000099812	0.466245	0.525444	NA	1.08134	11.5318	19.5452	7.5581	17.0637	8.55453	MISP
ENSG00000099814	-0.0262828	0.848866	0.958999	585.004	659.616	716.332	735.025	709.493	653.946	CEP170B
ENSG00000099817	-0.0148436	0.891972	0.973816	3559.77	4018.81	3662.77	3499.4	3727.08	3547.28	POLR2E
ENSG00000099821	0.141261	0.297351	0.665043	976.448	949.063	1111.14	1078.92	1080.4	844.997	POLRMT
ENSG00000099822	-0.164619	0.39464	0.743185	236.813	311.357	290.246	381.684	386.18	331.726	HCN2
ENSG00000099840	0.29049	0.443076	0.774686	23.7894	24.2167	42.9994	40.6248	48.497	29.4656	IZUMO4
ENSG00000099849	-0.326368	0.132924	0.462241	120.029	115.318	129.976	186.118	125.733	168.239	RASSF7
ENSG00000099860	0.196936	0.276714	0.644363	700.707	655.003	889.307	517.73	682.55	809.829	GADD45B
ENSG00000099864	-0.179989	0.253565	0.619639	304.937	352.872	266.792	358.065	316.128	295.606	PALM
ENSG00000099866	0.32078	0.544153	NA	12.9761	13.8381	16.6134	11.3371	13.4714	9.50503	MADCAM1
ENSG00000099875	-0.14748	0.205393	0.564777	2268.65	2478.17	2001.43	2472.44	2163.5	2175.7	MKNK2
ENSG00000099889	-0.740036	0.0439956	0.261623	19.4641	49.5865	26.386	43.4591	26.9428	29.4656	ARVCF
ENSG00000099899	0.217627	0.0607188	0.309034	1419.8	1245.43	1566.55	1306.61	1595.01	1387.73	TRMT2A
ENSG00000099901	-0.00590938	0.958977	0.991047	3340.25	3415.7	3342.23	2956.16	3029.26	3379.99	RANBP1
ENSG00000099904	0.207116	0.161496	0.508484	435.779	409.377	392.858	342.949	471.498	375.449	ZDHHC8
ENSG00000099910	-0.375604	0.0315831	0.218463	177.339	197.193	159.293	245.638	169.739	212.913	KLHL22
ENSG00000099917	-0.128589	0.326797	0.692621	1339.78	1551.02	1453.19	1762.93	1693.8	1592.09	MED15
ENSG00000099937	0.153411	0.810588	NA	14.0574	16.1445	3.90904	7.5581	20.6561	11.406	SERPIND1
ENSG00000099940	-0.189309	0.148781	0.488714	1147.3	1273.11	968.465	1111.04	956.468	1118.74	SNAP29
ENSG00000099942	-0.0196132	0.86069	0.961552	2647.12	2583.11	2393.31	2378.91	2308.99	2487.47	CRKL
ENSG00000198804	0.800154	0.000246473	0.0121915	127741	52698.9	79478.6	46401.1	113207	84916.1	MT-CO1
ENSG00000099954	-0.225123	0.570233	0.853145	16.2201	34.5953	35.1814	24.5638	28.7389	35.1686	CECR2
ENSG00000099956	-0.283076	0.0120854	0.129653	1947.49	2500.08	1920.32	2371.35	1886.89	2131.98	SMARCB1
ENSG00000099958	0.00711039	0.979378	0.995681	63.799	65.731	89.9079	86.9181	109.567	109.308	DERL3
ENSG00000099968	0.113246	0.407174	0.753398	2094.55	1877.37	1912.5	1523.9	1859.95	2022.67	BCL2L13
ENSG00000099974	-0.446003	0.153227	0.495057	47.5789	55.3524	35.1814	41.5695	36.8218	65.5847	DDTL
ENSG00000099977	0.156821	0.33016	0.694553	475.789	389.773	573.652	488.442	428.39	445.786	DDT
ENSG00000099985	-0.797009	0.027732	0.205187	40.0095	72.65	26.386	65.1886	31.4332	32.3171	OSM
ENSG00000099991	-0.0942919	0.602193	0.868418	1013.21	1055.16	1258.71	1647.67	1379.47	1194.78	CABIN1
ENSG00000099992	-0.0325377	0.894686	0.974866	103.808	116.471	112.385	119.04	172.434	162.536	TBC1D10A
ENSG00000099995	-0.0976078	0.368046	0.722774	3723.05	4379.76	3721.41	4000.12	4096.2	3971.2	SF3A1
ENSG00000099998	-0.197872	0.690784	0.904291	7.56937	27.6762	44.954	28.3429	23.3504	31.3666	GGT5
ENSG00000099999	-0.0499752	0.777482	0.93643	189.234	228.329	183.725	190.842	200.275	175.843	RNF215
ENSG00000100003	-0.595027	0.102402	0.401724	23.7894	26.523	28.3405	46.2934	26.0447	44.6737	SEC14L2
ENSG00000100014	0.126497	0.363952	0.719946	362.248	318.276	364.518	327.833	340.377	330.775	SPECC1L
ENSG00000100023	-0.135456	0.237114	0.60226	900.755	1015.95	979.214	1078.92	975.328	1041.75	PPIL2
ENSG00000259768	0.796813	0.00237368	0.0498767	97.3204	47.2802	133.885	80.3048	135.612	82.6938	AC004943.2
ENSG00000100027	0.520906	0.426408	NA	10.8134	2.30635	11.7271	15.1162	15.2676	8.55453	YPEL1
ENSG00000100028	0.107243	0.327336	0.692762	2222.15	2097.63	2328.81	1949.04	2176.08	2198.51	SNRPD3
ENSG00000100029	0.161986	0.141939	0.478145	3079.65	2882.94	3038.3	2495.12	2888.26	2672.82	PES1
ENSG00000100030	-0.0588559	0.602311	0.868418	2730.38	2662.68	2428.49	2834.29	2515.56	2496.02	MAPK1
ENSG00000100031	0.113974	0.419731	0.760815	1019.7	1065.53	1311.48	1181.9	1356.12	1160.56	GGT1
ENSG00000100034	0.172961	0.129992	0.457646	1739.87	1449.54	1594.89	1507.84	1545.62	1370.63	PPM1F
ENSG00000100036	-0.32103	0.549478	NA	16.2201	10.3786	7.81808	17.0057	13.4714	19.0101	SLC35E4
ENSG00000100038	0.0349417	0.927813	0.984212	32.4401	28.8294	30.2951	19.84	23.3504	35.1686	TOP3B
ENSG00000154265	0.795693	0.000331463	0.0146747	178.421	94.5604	220.861	125.653	253.262	154.932	ABCA5
ENSG00000100056	-0.00124559	0.99213	0.998111	525.53	537.38	501.334	501.669	525.384	515.173	ESS2
ENSG00000100058	0.308515	0.105479	0.408789	182.746	153.372	208.156	147.383	226.319	197.705	CRYBB2P1
ENSG00000100060	-0.0395683	0.769747	0.934188	453.081	499.325	484.721	525.288	498.441	452.44	MFNG
ENSG00000100065	-0.442375	0.146896	0.486437	54.0669	77.2627	56.6811	103.924	57.4779	47.5252	CARD10
ENSG00000100068	0.0794547	0.826827	0.951727	33.5215	28.8294	26.386	24.5638	28.7389	30.4161	LRP5L
ENSG00000100075	-0.0564827	0.732735	0.919328	2912.04	3655.56	4180.72	4428.1	4516.5	3990.21	SLC25A1
ENSG00000113302	0.792992	0.000125284	0.00798709	2598.46	1619.06	2490.06	878.629	2132.97	1670.98	IL12B
ENSG00000100083	-0.111176	0.357377	0.714464	803.434	874.107	812.103	956.1	890.009	876.364	GGA1
ENSG00000100084	0.0640776	0.666518	0.894004	473.626	410.53	442.699	478.05	411.326	380.201	HIRA
ENSG00000110944	0.790327	6.00445e-05	0.00500996	13232.3	7940.76	11807.3	4514.07	10815.7	8277.93	IL23A
ENSG00000100097	0.00670439	0.96307	0.991744	12997.7	15021.3	16744.4	14665.5	17840.6	17676.5	LGALS1
ENSG00000100099	-0.383163	0.0409127	0.251576	317.913	358.637	321.519	542.294	319.721	348.835	HPS4
ENSG00000100100	-0.318692	0.523853	NA	8.65071	14.9913	15.6362	25.5086	22.4523	18.0596	PIK3IP1
ENSG00000100104	-0.00797201	0.956673	0.990952	324.401	333.268	368.427	345.783	309.842	328.874	SRRD
ENSG00000100105	-0.15495	0.332738	0.697777	490.928	528.154	518.925	688.732	516.403	481.905	PATZ1
ENSG00000100106	-0.206901	0.0638334	0.317976	2021.02	2317.88	1914.45	2314.67	2204.82	2455.15	TRIOBP
ENSG00000100109	-0.0620138	0.624394	0.874125	900.755	908.702	818.944	801.159	825.346	946.701	TFIP11
ENSG00000100116	-0.107531	0.55128	0.84225	187.072	206.418	202.293	227.688	174.23	172.992	GCAT
ENSG00000100122	0.0826142	0.811382	0.946518	28.1148	33.4421	57.6583	44.4038	52.9874	53.2282	CRYBB1
ENSG00000100124	0.0219825	0.872252	0.965949	424.966	430.134	495.471	461.044	465.212	473.351	ANKRD54
ENSG00000100129	-0.194619	0.0636229	0.317814	4003.11	4737.24	4033.15	4404.48	3726.18	4320.04	EIF3L
ENSG00000100138	0.164741	0.153709	0.495836	1988.58	1820.86	1904.68	1576.81	1796.18	1678.59	SNU13
ENSG00000100139	-0.280676	0.0362483	0.236518	1015.38	1203.91	864.875	1278.26	1033.7	1057.91	MICALL1
ENSG00000100147	-0.346479	0.238572	0.604115	42.1722	46.127	40.0677	65.1886	46.7008	52.2777	CCDC134
ENSG00000100150	-0.379051	0.0167205	0.156097	315.751	423.215	341.064	464.823	297.268	352.637	DEPDC5
ENSG00000100151	-0.426746	0.0180067	0.161988	151.387	253.699	171.998	239.97	195.784	206.259	PICK1
ENSG00000100154	0.0745581	0.684834	0.90259	223.837	176.436	206.202	240.914	202.071	181.546	TTC28
ENSG00000100156	0.392594	0.476802	NA	17.3014	12.6849	8.79534	14.1714	37.7199	21.8616	SLC16A8
ENSG00000100162	-0.143273	0.314749	0.682339	376.306	463.576	449.54	454.431	456.231	499.014	CENPM
ENSG00000100167	-0.167446	0.400532	0.748688	219.512	209.878	162.225	245.638	177.822	172.041	2003-09-01
ENSG00000100181	0.406349	0.34503	0.706032	23.7894	12.6849	25.4088	20.7848	35.9237	30.4161	TPTEP1
ENSG00000100196	-0.0501299	0.825092	0.951129	87.5884	99.1731	123.135	119.985	127.529	131.169	KDELR3
ENSG00000100201	-0.101342	0.330534	0.694866	7811.59	7827.75	6806.62	7828.3	7306.88	7863.51	DDX17
ENSG00000100207	-0.145242	0.298169	0.665924	721.253	713.815	753.467	944.762	755.295	806.027	TCF20
ENSG00000100209	-0.253961	0.329134	0.693637	49.7416	86.4881	85.0216	78.4153	73.6435	84.5948	HSCB
ENSG00000100211	-0.0249436	0.902871	0.977863	110.296	118.777	127.044	124.709	143.695	144.476	CBY1
ENSG00000100216	-0.00779562	0.950744	0.988857	1484.68	1521.04	1290.96	1277.32	1326.48	1326.9	TOMM22
ENSG00000100219	-0.0162645	0.920844	0.981969	11706.6	12520	9234.13	9491.08	9195.56	8468.03	XBP1
ENSG00000100220	-0.0551944	0.620679	0.873597	1823.14	1896.97	1671.11	1710.96	1679.43	1767.94	RTCB
ENSG00000100221	-0.0294956	0.808498	0.945991	1006.73	962.901	912.761	900.359	878.334	991.375	JOSD1
ENSG00000100225	-0.278805	0.0100446	0.118799	1669.59	2069.95	1664.27	2052.02	1608.48	1874.39	FBXO7
ENSG00000100226	-0.111637	0.41813	0.759817	700.707	776.087	808.194	945.707	828.041	803.175	GTPBP1
ENSG00000100227	-0.0403581	0.71766	0.914544	2790.93	2628.09	2493.97	2569.75	2560.46	2868.62	POLDIP3
ENSG00000151292	0.78617	2.71505e-05	0.00297098	1838.27	1062.07	1978.95	748.252	1543.82	1298.39	CSNK1G3
ENSG00000100239	0.00320308	0.976351	0.994508	1719.33	1712.46	1830.41	1827.17	1851.87	1849.68	PPP6R2
ENSG00000100241	0.0456058	0.652237	0.887236	2990.98	2903.69	2919.08	2961.83	2991.54	2759.31	SBF1
ENSG00000142207	0.785818	2.04486e-09	3.89984e-06	1336.53	689.599	1445.37	804.938	1279.78	859.255	URB1
ENSG00000100243	0.00564096	0.961201	0.991302	3320.79	3611.74	3696	3578.76	4030.64	3815.32	CYB5R3
ENSG00000100246	-0.310247	0.0961744	0.393765	149.225	170.67	133.885	202.179	173.332	192.952	DNAL4
ENSG00000100258	0.0384242	0.765763	0.933176	1208.94	1261.57	1228.42	1210.24	1480.06	1344.01	LMF2
ENSG00000100263	0.360909	0.027845	0.205446	461.731	410.53	618.606	402.469	605.314	499.965	RHBDD3
ENSG00000237181	0.782791	5.35354e-05	0.0046409	446.593	330.961	647.923	254.141	584.658	391.607	AC147651.4
ENSG00000100271	-0.224051	0.399512	0.74751	71.3683	132.615	139.748	154.941	121.242	101.704	TTLL1
ENSG00000100276	0.309883	0.511167	NA	20.5454	11.5318	17.5907	16.061	30.5351	27.5646	RASL10A
ENSG00000100280	0.167036	0.169335	0.520911	2848.24	2650	3155.57	2639.67	3362.46	3053.02	AP1B1
ENSG00000100281	-0.246875	0.0358004	0.235605	1181.9	1356.13	1157.08	1381.24	1037.3	1267.97	HMGXB4
ENSG00000100284	0.454278	0.00747831	0.0994377	1666.34	1375.74	1785.45	1009.95	2018.91	1608.25	TOM1
ENSG00000100285	0.21004	0.0644266	0.319355	1253.27	1054	1266.53	1084.59	1147.76	1031.3	NEFH
ENSG00000100288	0.302994	0.201575	0.560515	98.4018	89.9477	97.726	93.5315	149.083	96.9513	CHKB
ENSG00000185433	0.765039	0.0011093	0.0314661	138.411	91.1008	143.657	57.6305	132.918	96.0008	LINC00158
ENSG00000100292	-0.374835	0.496292	0.809765	2320.55	3349.97	1422.89	1586.26	3517.83	4479.72	HMOX1
ENSG00000100294	-0.157961	0.328377	0.693194	234.65	295.213	292.201	329.722	300.861	299.409	MCAT
ENSG00000100296	0.0145949	0.908103	0.979498	804.516	769.168	872.693	823.833	860.372	918.186	THOC5
ENSG00000100297	-0.287033	0.0330684	0.224434	3161.83	4254.06	3869.95	4994.01	4089.01	4321.94	MCM5
ENSG00000100298	-0.212119	0.578524	0.857858	24.8708	27.6762	21.4997	25.5086	23.3504	27.5646	APOBEC3H
ENSG00000100299	-0.107296	0.438946	0.773037	538.506	697.671	607.856	606.537	668.18	652.996	ARSA
ENSG00000100300	-0.0678428	0.50867	0.817364	2537.9	2772.23	2749.03	2836.18	2727.51	2792.58	TSPO
ENSG00000100304	0.0372477	0.744218	0.923329	1725.82	1732.07	1843.11	1905.59	1862.64	1655.78	TTLL12
ENSG00000100307	-0.26449	0.121669	0.442158	233.569	272.149	232.588	344.838	266.733	263.289	CBX7
ENSG00000100311	-0.463926	0.0598267	0.306978	78.9377	115.318	59.6129	93.5315	96.9939	116.912	PDGFB
ENSG00000100316	-0.0411671	0.716492	0.914392	41167.6	43635	38923.3	37390.9	36169.8	38600.9	RPL3
ENSG00000100319	0.205046	0.182607	0.537686	285.473	237.554	254.088	229.577	263.141	229.071	ZMAT5
ENSG00000100320	-0.0799993	0.582408	0.860091	477.951	495.865	419.245	531.901	482.275	430.578	RBFOX2
ENSG00000100321	-0.0862102	0.650376	0.886489	198.966	235.248	232.588	296.655	269.428	212.913	SYNGR1
ENSG00000100324	-0.251501	0.101069	0.399839	314.669	355.178	306.86	436.48	351.154	365.944	TAB1
ENSG00000100325	-0.0440704	0.686671	0.903423	1924.78	2188.73	2037.59	1950.93	2052.14	2063.54	ASCC2
ENSG00000100330	-0.433278	0.0681347	0.330099	83.263	107.245	75.249	117.151	69.1531	82.6938	MTMR3
ENSG00000100335	0.115606	0.353815	0.711576	1659.85	1401.11	1662.32	1709.08	1580.64	1413.4	MIEF1
ENSG00000100342	-0.180463	0.334274	0.697901	222.756	217.95	261.906	330.667	261.345	295.606	APOL1
ENSG00000100344	-0.351231	0.0972044	0.395346	215.186	220.256	145.612	280.594	178.72	186.299	PNPLA3
ENSG00000100345	-0.00589091	0.955841	0.990746	35252.7	33567.8	33499.5	38029.5	37006.8	34593.6	MYH9
ENSG00000100347	-0.0624223	0.584619	0.860741	813.166	870.647	818.944	845.562	801.996	825.987	SAMM50
ENSG00000100348	0.0241821	0.831765	0.953027	1557.13	1542.95	1738.55	1661.84	1706.37	1713.76	TXN2
ENSG00000100350	-0.0867762	0.593713	0.86463	395.77	385.16	438.79	533.791	412.224	403.964	FOXRED2
ENSG00000100353	-0.0658707	0.534629	0.834673	4659.49	5199.67	5325.09	5262.33	5173.91	5405.51	EIF3D
ENSG00000100354	-0.254703	0.118634	0.43654	421.722	404.764	340.086	542.294	408.632	447.687	TNRC6B
ENSG00000100359	0.0509213	0.672615	0.897757	1460.89	1386.12	1339.82	1294.32	1528.55	1498.94	SGSM3
ENSG00000100360	0.268999	0.174247	0.527957	179.502	176.436	169.066	140.77	175.128	118.813	IFT27
ENSG00000100364	-0.238786	0.116474	0.432405	7658.04	8742.22	5959.33	8107.95	6090.86	6405.44	KIAA0930
ENSG00000100365	-0.172201	0.206398	0.566209	2110.77	2350.17	1809.89	2331.67	1871.62	1844.93	NCF4
ENSG00000100368	-0.154162	0.396746	0.744899	514.717	558.137	363.541	505.448	426.594	388.756	CSF2RB
ENSG00000100372	-0.109761	0.469995	0.794892	348.191	363.25	329.337	359.954	288.288	318.419	SLC25A17
ENSG00000100376	-0.117128	0.430269	0.768046	368.736	439.36	380.154	416.64	360.135	347.884	FAM118A
ENSG00000100379	0.164824	0.341684	0.703065	211.942	174.129	178.839	172.892	184.109	165.388	KCTD17
ENSG00000100380	0.141999	0.178494	0.533174	5564.57	5285	5519.56	4684.13	5244.86	4830.46	ST13
ENSG00000100385	-0.375379	0.187014	0.54142	81.1004	77.2627	95.7715	172.892	121.242	135.922	IL2RB
ENSG00000100387	-0.0439792	0.74071	0.922197	1263	1380.35	1207.89	1074.19	1210.63	1342.11	RBX1
ENSG00000100393	-0.011299	0.935929	0.987017	3449.47	2944.06	2937.64	3803.61	3172.06	2884.78	EP300
ENSG00000100395	0.0423741	0.709091	0.912295	1124.59	1033.24	1016.35	1056.24	1102.86	1059.81	L3MBTL2
ENSG00000100399	-0.0608355	0.837499	0.954095	47.5789	49.5865	45.9312	38.7353	44.9046	56.0797	CHADL
ENSG00000100401	0.0758331	0.493547	0.808467	2506.54	2462.03	2756.85	2530.07	2838.87	2695.63	RANGAP1
ENSG00000100403	0.290764	0.00596264	0.086274	2483.83	2001.91	2630.78	2037.85	2493.1	2178.55	ZC3H7B
ENSG00000100410	0.159741	0.234079	0.598888	1275.98	1070.15	1074.01	933.425	1018.44	1011.34	PHF5A
ENSG00000100412	-0.051616	0.640562	0.881508	2157.27	2492.01	2267.24	2201.3	2354.8	2335.39	ACO2
ENSG00000100413	0.0679308	0.585245	0.860741	1264.08	1265.03	1203.98	1136.55	1144.17	1045.55	POLR3H
ENSG00000100416	0.235392	0.0825878	0.364809	538.506	461.27	527.72	419.474	562.206	502.816	TRMU
ENSG00000100417	-0.266465	0.072201	0.340341	294.124	362.097	335.2	423.254	334.09	373.548	PMM1
ENSG00000100418	0.28204	0.0368211	0.23772	1428.45	1255.81	1500.09	997.669	1285.17	1212.84	DESI1
ENSG00000100422	-0.317042	0.0638738	0.318047	1479.27	1650.19	1176.62	1791.27	1090.28	1224.25	CERK
ENSG00000100425	-0.161643	0.241911	0.607384	791.54	833.746	819.921	1043.02	793.015	811.73	BRD1
ENSG00000100426	-0.0412017	0.761514	0.931737	972.123	936.378	1021.24	1197.01	1009.46	955.256	ZBED4
ENSG00000100427	-0.0144114	0.943598	0.988106	3123.99	3159.7	4856	4900.48	4964.65	5013.9	MLC1
ENSG00000100429	0.081046	0.578682	0.857902	333.052	348.259	405.563	365.623	388.874	352.637	HDAC10
ENSG00000100433	0.0526478	0.91876	NA	18.3827	9.2254	11.7271	16.061	14.3695	17.1091	KCNK10
ENSG00000100439	-0.115067	0.615999	0.872729	95.1578	87.6413	100.658	115.261	116.752	134.971	ABHD4
ENSG00000100441	-0.175983	0.116899	0.433248	1854.49	1866.99	1706.3	2085.09	1680.33	1966.59	KHNYN
ENSG00000100442	0.0416074	0.767206	0.933315	706.114	712.662	720.241	595.2	729.251	787.017	FKBP3
ENSG00000100445	0.304439	0.0606992	0.309034	276.823	214.491	257.019	195.566	272.122	242.378	SDR39U1
ENSG00000100448	-0.0415951	0.851546	0.958999	11105.3	12215.6	19101.5	18834.8	19951.1	20574.6	CTSG
ENSG00000100461	-0.258218	0.0225477	0.184443	2606.02	3157.39	2338.58	2785.16	2393.42	2834.4	RBM23
ENSG00000100462	0.23729	0.0360219	0.236223	1448.99	1305.39	1655.48	1288.66	1539.33	1345.91	PRMT5
ENSG00000100473	-0.0968917	0.709099	0.912295	103.808	85.335	128.998	153.996	148.185	167.289	COCH
ENSG00000100478	-0.158843	0.40501	0.752112	149.225	149.913	133.885	188.008	156.268	152.081	AP4S1
ENSG00000100479	-0.05262	0.817192	0.948604	87.5884	94.5604	114.339	131.322	117.65	105.506	POLE2
ENSG00000100483	0.107931	0.60228	0.868418	217.349	181.048	151.475	175.726	163.453	136.872	VCPKMT
ENSG00000100485	-0.450735	0.00737746	0.0987855	767.75	898.323	629.355	1114.82	625.072	748.997	SOS2
ENSG00000100490	-0.603821	0.180504	NA	16.2201	20.7572	13.6816	39.68	24.2485	21.8616	CDKL1
ENSG00000100503	0.07945	0.547044	0.840739	2312.98	1935.03	2304.38	2518.74	2213.8	2009.36	NIN
ENSG00000100504	-0.153122	0.244508	0.610355	2599.54	3103.19	3347.12	3623.16	3041.84	3268.78	PYGL
ENSG00000100505	0.386471	0.52995	NA	16.2201	2.30635	14.6589	16.061	12.5733	14.2575	TRIM9
ENSG00000100519	0.145038	0.260372	0.626639	1518.2	1351.52	1529.41	1174.34	1357.02	1457.12	PSMC6
ENSG00000100522	0.0372285	0.812231	0.947094	309.263	294.06	360.609	338.225	290.982	303.211	GNPNAT1
ENSG00000100523	-0.106432	0.572648	0.854577	370.899	320.583	431.949	503.558	438.269	510.42	DDHD1
ENSG00000100526	0.00885453	0.953276	0.989676	413.071	480.874	456.38	417.585	528.078	492.361	CDKN3
ENSG00000100528	0.0484141	0.713257	0.913784	1567.94	1562.55	1428.75	1248.98	1338.16	1381.08	CNIH1
ENSG00000100532	-0.0918036	0.755579	0.928474	68.1243	66.8842	43.9767	45.3486	51.1912	61.7827	CGRRF1
ENSG00000100554	0.174193	0.21576	0.578257	719.09	633.093	793.535	581.974	693.327	739.492	ATP6V1D
ENSG00000100564	0.295868	0.124241	0.446834	273.579	235.248	202.293	170.057	247.873	185.348	PIGH
ENSG00000100567	-0.0428949	0.744735	0.923396	2088.06	2231.39	2199.81	1881.02	2132.07	2501.72	PSMA3
ENSG00000100568	-0.0241494	0.858572	0.961411	2760.66	2814.9	2413.83	2341.12	2192.24	2335.39	VTI1B
ENSG00000100575	0.301268	0.0898716	0.380281	317.913	266.383	288.292	189.897	273.918	258.537	TIMM9
ENSG00000100577	-0.0488381	0.802243	0.94541	221.674	226.022	303.928	317.44	308.046	318.419	GSTZ1
ENSG00000100578	-0.141675	0.413689	0.758079	246.545	267.537	302.951	364.678	294.574	298.458	KIAA0586
ENSG00000100580	-0.211127	0.196858	0.553872	991.587	1057.46	965.533	1407.7	957.366	907.731	TMED8
ENSG00000100583	-0.39103	0.303298	0.670597	29.1961	26.523	21.4997	30.2324	20.6561	36.1191	SAMD15
ENSG00000089351	0.763335	0.00053499	0.0199501	4542.7	3080.13	4909.75	1696.79	5100.26	3797.26	GRAMD1A
ENSG00000198938	0.763082	0.000461843	0.0181876	63033.4	25093.1	34514.9	22635.6	46977.4	37429.9	MT-CO3
ENSG00000100596	-0.310912	0.100084	0.398454	337.378	347.106	297.087	479.939	280.205	306.062	SPTLC2
ENSG00000100599	-0.292739	0.142748	0.479055	357.923	453.198	240.406	382.629	326.905	298.458	RIN3
ENSG00000100600	0.110372	0.793209	NA	32.4401	25.3699	17.5907	23.6191	22.4523	18.0596	LGMN
ENSG00000100601	0.288269	0.132258	0.461413	222.756	161.445	225.747	152.107	204.765	220.517	ALKBH1
ENSG00000100603	-0.0311443	0.771158	0.934301	2278.38	2332.87	2305.36	2183.35	2243.43	2459.9	SNW1
ENSG00000100605	-0.416831	0.00286697	0.0558745	1358.16	1747.06	1119.94	1800.72	1237.57	1412.45	ITPK1
ENSG00000100612	-0.160426	0.286576	0.655572	299.531	372.476	335.2	352.396	294.574	314.617	DHRS7
ENSG00000100614	-0.187232	0.225637	0.588445	501.741	509.703	515.993	701.958	521.791	539.886	PPM1A
ENSG00000100625	-0.392641	0.509423	NA	11.8947	8.07223	5.86356	21.7295	15.2676	13.307	SIX4
ENSG00000100628	-1.03609	0.022279	NA	17.3014	34.5953	7.81808	33.0667	18.8599	22.8121	ASB2
ENSG00000100629	0.103637	0.47691	0.799685	424.966	341.34	399.699	369.402	394.262	422.023	CEP128
ENSG00000100632	0.0354318	0.783372	0.938444	3738.19	3805.48	3459.5	2959.94	3280.73	3459.83	ERH
ENSG00000100644	0.357893	0.00386354	0.0666387	3351.07	2641.92	3087.16	2154.06	3081.35	2632.89	HIF1A
ENSG00000100647	-0.0514398	0.709649	0.912633	4015.01	4293.27	3266.98	3405.87	3467.53	3441.77	SUSD6
ENSG00000105136	0.762737	0.000880663	0.027926	121.11	65.731	107.499	66.1334	137.408	83.6443	ZNF419
ENSG00000100664	-0.0289543	0.804458	0.945701	9862.89	9584.04	8806.09	8500.03	8204.97	9333.94	EIF5
ENSG00000100697	0.219567	0.158355	0.504119	721.253	541.992	734.899	775.65	775.951	597.867	DICER1
ENSG00000100711	0.100836	0.580494	0.858828	226	215.644	271.678	222.019	284.695	291.804	ZFYVE21
ENSG00000100714	0.011412	0.918666	0.981263	2373.54	2437.81	2705.06	2618.88	2670.03	2630.99	MTHFD1
ENSG00000100722	-0.0484189	0.689513	0.90416	687.731	684.986	697.764	766.202	699.614	704.323	ZC3H14
ENSG00000100726	-0.143901	0.287134	0.656152	1337.62	1583.31	1520.62	1864.02	1683.92	1572.13	TELO2
ENSG00000100731	-0.0129261	0.917578	0.980837	1433.85	1353.83	1221.57	1439.82	1330.97	1228.05	PCNX1
ENSG00000100744	-0.139222	0.444394	0.775029	165.445	204.112	180.793	169.112	149.981	173.942	GSKIP
ENSG00000100749	-0.170901	0.152405	0.493958	1272.74	1424.17	1192.26	1243.31	1195.36	1453.32	VRK1
ENSG00000100764	-0.0786598	0.492294	0.807188	2295.68	2490.86	2134.34	2171.06	2081.78	2215.62	PSMC1
ENSG00000100767	0.228702	0.172312	0.525319	214.105	178.742	207.179	201.234	229.013	174.893	PAPLN
ENSG00000100784	-0.702547	0.00487181	0.076516	65.9616	100.326	58.6356	131.322	70.9493	86.4958	RPS6KA5
ENSG00000100796	0.0171259	0.884738	0.971428	2170.25	2033.05	1935.95	1931.09	1810.55	1882	PPP4R3A
ENSG00000100802	0.101504	0.757002	0.929355	36.7655	58.8119	88.9307	68.9677	62.8664	48.4757	C14orf93
ENSG00000100804	0.192293	0.133141	0.462633	1364.65	1267.34	1615.41	1206.46	1492.63	1440.96	PSMB5
ENSG00000100811	-0.259228	0.0445586	0.263328	3009.36	3694.77	2720.69	3493.73	2691.58	2891.43	YY1
ENSG00000100813	-0.0822898	0.439936	0.774004	3128.31	3202.37	3227.89	3632.61	3273.55	3359.08	ACIN1
ENSG00000100814	-0.178396	0.216902	0.579245	1178.66	1308.85	963.578	1132.77	937.608	1043.65	CCNB1IP1
ENSG00000100815	0.30335	0.0766061	0.351199	888.86	665.382	901.034	571.581	865.761	914.384	TRIP11
ENSG00000100823	0.0838661	0.421544	0.762246	4429.16	4327.87	4423.08	4302.45	4390.77	3865.7	APEX1
ENSG00000100836	0.0473066	0.718971	0.914845	2145.37	2015.75	1953.54	1662.78	1898.57	2125.33	PABPN1
ENSG00000100865	0.0659251	0.616676	0.872808	522.286	490.099	500.357	446.873	478.683	497.113	CINP
ENSG00000100883	-0.0175439	0.877933	0.968427	1359.24	1303.09	1427.78	1390.69	1348.93	1491.34	SRP54
ENSG00000100888	-0.103751	0.414064	0.758105	1801.51	1720.54	1762	2178.62	1741.4	1799.3	CHD8
ENSG00000100889	0.17717	0.225213	0.588002	1166.76	1010.18	1055.44	888.077	1272.6	1192.88	PCK2
ENSG00000100890	0.0456347	0.856245	0.960658	67.043	57.6588	64.4992	71.8019	68.255	63.6837	KIAA0391
ENSG00000100897	0.00358197	0.976556	0.994523	1208.94	1173.93	1373.05	1334	1297.74	1361.12	DCAF11
ENSG00000100902	0.01908	0.869197	0.964904	1405.74	1433.4	1375.98	1240.47	1354.32	1408.65	PSMA6
ENSG00000100906	-0.125054	0.349639	0.709201	25646.1	28499.6	21763.6	23460.3	21054	22703.7	NFKBIA
ENSG00000100908	-0.255309	0.23062	0.59413	107.052	104.939	91.8624	118.095	104.179	137.823	EMC9
ENSG00000100911	0.0119981	0.911119	0.980412	2288.11	2360.55	2306.33	2152.17	2382.64	2407.62	PSME2
ENSG00000100916	-0.346221	0.0966793	0.394459	98.4018	149.913	108.476	124.709	98.7901	115.011	BRMS1L
ENSG00000100918	0.240096	0.299663	0.667229	149.225	137.228	178.839	171.002	261.345	191.051	REC8
ENSG00000100926	-0.140456	0.410212	0.75511	178.421	197.193	162.225	189.897	172.434	178.695	TM9SF1
ENSG00000100934	-0.124291	0.427122	0.765162	355.76	306.745	312.723	385.463	307.147	368.795	SEC23A
ENSG00000100938	-0.0660325	0.629041	0.876673	659.616	616.949	663.559	779.429	713.085	733.788	GMPR2
ENSG00000100941	-0.108922	0.320505	0.687718	3023.42	3234.66	2910.28	3245.26	2763.43	2899.03	PNN
ENSG00000100949	-0.290323	0.0195473	0.16999	659.616	861.422	681.15	749.197	632.257	803.175	RABGGTA
ENSG00000100979	-0.0671559	0.688204	0.903795	365.492	424.368	476.903	515.84	523.588	491.41	PLTP
ENSG00000100982	-0.390699	0.003156	0.0592656	532.018	749.564	545.311	725.578	522.69	623.53	PCIF1
ENSG00000100983	-0.142135	0.364647	0.720555	637.99	834.899	934.26	931.536	844.206	901.077	GSS
ENSG00000100985	0.500045	0.0945533	0.39068	58.3923	34.5953	48.863	39.68	49.3951	36.1191	MMP9
ENSG00000100991	-0.201592	0.0736627	0.344206	1637.15	1947.71	1674.05	1940.54	1568.97	1724.21	TRPC4AP
ENSG00000100994	-0.123823	0.267933	0.633362	1540.91	1627.13	1473.71	1518.23	1400.13	1664.33	PYGB
ENSG00000100997	-0.163528	0.156641	0.500322	1048.9	1207.37	1154.14	1256.53	1038.19	1166.27	ABHD12
ENSG00000101000	0.0436346	0.828286	0.952182	111.378	110.705	114.339	122.819	128.427	110.258	PROCR
ENSG00000101003	-0.0157871	0.902658	0.977863	602.305	616.949	650.855	698.179	689.735	649.194	GINS1
ENSG00000101004	-0.534859	0.0077905	0.102265	177.339	251.392	186.657	363.734	243.383	265.19	NINL
ENSG00000101017	0.390417	0.0672211	0.327017	3147.78	2563.51	3514.23	1758.2	3862.69	3707.91	CD40
ENSG00000101019	0.0203706	0.89073	0.973594	511.473	520.082	490.584	408.137	451.74	505.668	UQCC1
ENSG00000101040	0.0646694	0.741124	0.922197	266.009	253.699	248.224	334.446	361.033	249.032	ZMYND8
ENSG00000101052	-0.119125	0.413216	0.757562	494.172	486.64	509.152	489.387	417.613	565.549	IFT52
ENSG00000101057	-0.190667	0.137691	0.470235	4897.38	5908.87	6044.35	6992.19	6000.15	6434.91	MYBL2
ENSG00000101079	0.115095	0.457999	0.785239	288.717	280.222	287.314	292.876	304.453	240.477	NDRG3
ENSG00000101082	-0.449316	0.127524	0.453624	43.2535	49.5865	48.863	71.8019	37.7199	55.1292	SLA2
ENSG00000101084	-0.000676074	0.995249	0.999366	1496.57	1537.18	1439.5	1381.24	1374.98	1395.34	C20orf24
ENSG00000101096	0.0408046	0.828046	0.952182	259.521	252.545	323.473	366.568	325.109	263.289	NFATC2
ENSG00000101098	0.276046	0.333867	0.697901	61.6363	47.2802	77.2035	83.1391	94.2997	61.7827	RIMS4
ENSG00000101104	0.163091	0.594386	0.86493	48.6602	61.1183	79.1581	41.5695	72.7454	76.9908	PABPC1L
ENSG00000101109	-0.275389	0.0737168	0.344339	2015.61	2345.56	1504	2160.67	1658.78	1761.28	STK4
ENSG00000101115	0.525593	0.152377	0.493958	34.6028	23.0635	58.6356	38.7353	70.0512	51.3272	SALL4
[truncated: 13,448 more rows]

## Sheet: Table 3 shNR4A3 basal
ID	log2FoldChange	pvalue	padj	A6	A12	B6	B12	C6	C12	Gene.name	shNR4A3 Cells	Differential gene expression analysis
ENSG00000000003	-0.127517	0.692876	0.891171	37.5794	40.5017	39.3149	53.8502	73.4069	70.0559	TSPAN6		shNR4A3 5% CO2 + LPS Vs shNR4A3 10% CO2 + LPS
ENSG00000000419	-0.11034	0.277286	0.616453	993.008	1070.1	952.038	986.133	1031.32	1154.89	DPM1		Ranked by fold change
ENSG00000000457	-0.319243	0.0464188	0.260009	153.734	197.179	179.615	213.157	174.908	225.621	SCYL3		Padj </=0.05
ENSG00000000460	0.252172	0.138185	0.447546	240.281	225.957	262.87	155.941	229.283	232.833	C1orf112
ENSG00000000938	-0.406101	0.0209843	0.169122	618.353	847.338	381.586	539.624	489.379	581.052	FGR		shNR4A3 5% CO2 + LPS samples			shNR4A3 10% CO2 +LPS samples
ENSG00000001036	0.00838435	0.928053	0.979479	2626.01	2892.67	2684.98	2404.19	2728.74	2696.12	FUCA2
ENSG00000001084	0.0318268	0.75923	0.916819	737.924	754.61	749.296	676.494	744.944	752.07	GCLC		A11			A5
ENSG00000001167	0.100427	0.241818	0.581561	2414.19	2227.59	2483.01	2164.11	2277.43	2300.51	NFYA		B11			B5
ENSG00000001460	0.196245	0.288571	0.626838	160.567	124.703	129.508	141.357	154.064	120.537	STPG1		C11			C5
ENSG00000001461	0.0403772	0.738098	0.908052	449.815	459.374	531.137	476.799	512.036	518.207	NIPAL3
ENSG00000001497	0.0636251	0.521132	0.804751	1307.31	1367.46	1517.09	1447.23	1451.82	1281.61	LAS1L
ENSG00000001561	0.37871	0.014626	0.138218	394.015	274.985	336.875	218.767	302.69	298.768	ENPP4
ENSG00000001617	0.19426	0.242712	0.581971	178.787	144.953	168.052	153.698	175.814	157.626	SEMA3F
ENSG00000001629	0.247794	0.0139601	0.134504	991.87	784.453	908.098	788.682	885.414	770.614	ANKIB1
ENSG00000001630	-0.289584	0.0793453	0.340918	153.734	185.455	141.842	180.623	150.439	178.23	CYP51A1
ENSG00000001631	0.121525	0.279723	0.618192	734.507	683.199	778.59	610.303	688.756	730.435	KRIT1
ENSG00000002016	0.341413	0.18091	0.508985	112.738	63.95	64.754	69.5566	78.8444	66.9652	RAD52
ENSG00000002330	-0.162545	0.255599	0.595527	404.264	394.358	356.147	448.752	308.128	351.31	BAD
ENSG00000002549	0.0704934	0.456671	0.761407	2063.45	2060.26	2075.21	1744.52	1984.7	2025.44	LAP3
ENSG00000002586	-0.177202	0.0656872	0.313017	3212.47	3727.22	3459.71	3877.22	3839.81	4283.71	CD99
ENSG00000002726	-0.0415183	0.761464	0.917438	637.712	672.541	493.364	512.699	541.942	532.631	AOC1
ENSG00000002822	-0.199969	0.057306	0.289743	963.4	1216.12	962.83	1193.68	1063.04	1025.08	MAD1L1
ENSG00000002834	0.00514371	0.954899	0.988129	4934.3	4594.81	4444.9	5040.61	5260.83	4950.27	LASP1
ENSG00000002919	-0.0155504	0.874793	0.959475	1289.09	1301.38	1191.01	1163.39	1139.17	1190.95	SNX11
ENSG00000003056	0.0307262	0.746596	0.912366	3367.35	3180.45	2890.8	2935.96	2891.87	2836.23	M6PR
ENSG00000003096	0.44329	0.052018	0.27642	107.044	61.8183	125.654	84.141	99.6883	98.9024	KLHL13
ENSG00000003137	-0.440588	0.402026	NA	7.9714	12.79	10.7923	20.1938	18.1252	17.514	CYP26B1
ENSG00000003147	-0.259106	0.116249	0.410081	151.457	207.838	201.971	236.717	200.283	221.5	ICA1
ENSG00000003249	-0.564345	0.0324095	0.213515	58.0773	88.4642	50.1073	112.188	70.6881	63.8745	DBNDD1
ENSG00000003393	0.112887	0.330003	0.669294	460.064	462.572	504.156	439.777	486.66	440.94	ALS2
ENSG00000003400	-0.162881	0.295225	0.634117	200.424	218.496	228.952	226.62	212.971	275.072	CASP10
ENSG00000274012	1.93945	0.00022666	0.0114005	409.958	125.768	1194.87	261.398	772.132	232.833	RN7SL2	Basal	shNR4A3 5% CO2 Vs shNR4A3 10% CO2
ENSG00000003436	-0.404806	0.110407	0.402171	63.7712	67.1475	63.2122	102.091	87.907	115.386	TFPI
ENSG00000003509	-0.0360957	0.828093	0.939917	257.362	250.471	222.014	188.476	200.283	255.498	NDUFAF7
ENSG00000003756	-0.139911	0.113009	0.405774	1852.78	2128.47	1845.49	1918.42	1896.8	2117.13	RBM5
ENSG00000003987	-0.0747212	0.789712	0.929029	74.0201	81.0033	57.0452	54.9721	48.0317	51.5117	MTMR7
ENSG00000003989	0.307256	0.111816	0.403723	132.097	109.781	182.699	144.723	174.908	143.202	SLC7A2
ENSG00000004059	-0.0594641	0.546927	0.817912	1474.71	1514.55	1263.47	1459.57	1482.64	1420.69	ARF5
ENSG00000004139	-0.198939	0.605885	NA	42.1345	42.6333	24.6682	23.5595	20.8439	32.9675	SARM1
ENSG00000004142	0.0740355	0.391826	0.719651	2080.53	1953.67	2044.38	1950.95	1935.77	1852.36	POLDIP2
ENSG00000004399	-0.250691	0.0352385	0.224806	796.001	835.613	800.175	1112.91	892.664	1013.75	PLXND1
ENSG00000004455	0.0653976	0.398913	0.72573	9355	8728.11	9256.74	8964.94	8758.98	8464.4	AK2
ENSG00000165449	1.5155	6.38534e-07	0.000224193	77.4364	30.9092	96.3601	28.047	61.6255	23.6954	SLC16A9		Ranked by fold change
ENSG00000185875	1.15787	0.000738988	0.0241019	52.3835	27.7117	80.1716	16.8282	51.6567	38.1186	THNSL1		Padj </=0.05
ENSG00000004487	0.109415	0.220745	0.557539	2257.04	2214.8	2593.24	2321.17	2457.77	2242.82	KDM1A
ENSG00000004534	-0.228771	0.0128731	0.129498	1701.32	2126.34	1710.59	2068.75	1737.3	1840	RBM6
ENSG00000004660	-0.296683	0.1084	0.397894	137.791	173.731	142.613	209.792	145.001	140.112	CAMKK1
ENSG00000004700	-0.0562338	0.599196	0.844999	717.426	747.149	794.778	765.122	764.882	857.154	RECQL
ENSG00000004766	0.399433	0.00409566	0.0670653	340.493	267.524	327.624	224.376	346.19	276.103	VPS50
ENSG00000004777	-0.466171	0.0189686	0.160217	236.864	448.716	316.832	475.677	288.19	242.105	ARHGAP33
ENSG00000004779	0.0946427	0.357073	0.691006	1139.91	1049.85	1078.46	990.62	974.227	947.815	NDUFAB1
ENSG00000258701	1.096	6.50617e-05	0.00530847	79.714	47.9625	111.007	35.9002	73.4069	40.1791	LINC00638
ENSG00000004809	0.211722	0.0280923	0.197479	1169.52	943.263	1153.24	1020.91	1078.45	972.54	SLC22A16
ENSG00000004838	-0.0363035	0.931322	NA	26.1917	35.1725	18.5011	31.4126	34.4378	14.4233	ZMYND10
ENSG00000004848	-0.0772868	0.747615	0.912568	70.6038	61.8183	70.9211	83.0191	68.8756	77.2675	ARX
ENSG00000004864	0.0998868	0.442933	0.75264	350.741	354.923	359.231	348.905	422.316	353.37	SLC25A13
ENSG00000004866	0.119355	0.406539	0.729014	281.276	316.553	360.772	271.495	311.753	292.586	ST7
ENSG00000004897	-5.61866e-05	0.999557	0.99982	1867.58	1736.24	2005.83	2036.21	2048.14	2151.13	CDC27
ENSG00000004961	0.183242	0.117976	0.413591	651.377	583.011	696.106	514.943	616.255	631.533	HCCS
ENSG00000004975	0.118251	0.304421	0.644456	505.614	468.967	551.18	526.162	541.036	479.058	DVL2
ENSG00000005007	0.00802173	0.92203	0.976887	4971.87	4723.77	5114.8	5233.57	4840.32	4888.46	UPF1
ENSG00000005020	0.276712	0.00324277	0.0576044	1997.4	1613.67	1811.57	1451.71	1910.39	1652.49	SKAP2
[truncated: 15,225 more rows]

## Sheet: Table 4 shNR4A3 + LPS
ID	log2FoldChange	pvalue	padj	A5	A11	B5	B11	C5	C11	Gene.name	shNR4A3 Cells	Differential gene expression analysis
[truncated: 15,332 more rows]

[truncated: 1 more sheets: Table 5 Metacore TF analysis]
